# Supplementary material for: Pathogenesis of Enamel-Renal Syndrome Associated Gingival Fibromatosis: A Proteomic Approach
Source: Front Endocrinol (Lausanne). 2021 Oct 29;12:752568. doi: 10.3389/fendo.2021.752568 (PMC8586505; doi:10.3389/fendo.2021.752568)
Supplement: Supplementary file 3 [file Table_2.xlsx]

## Sheet: Controls
				Normalized abundance
				ECS
Accession	Description	Peptides used for quantitation	Confidence score	Surn_Ctl_1_01	Surn_Ctl_2_01	Surn_Ctl_3_01	Average abundance
MMP1_HUMAN	Interstitial collagenase OS=Homo sapiens GN=MMP1 PE=1 SV=3	29	1487.43	1.99916e+07	2.1718e+07	2.14725e+07	2.10607e+07
CO1A2_HUMAN	Collagen alpha-2(I) chain OS=Homo sapiens GN=COL1A2 PE=1 SV=7	78	4061.73	1.67994e+07	2.21901e+07	1.81832e+07	1.90576e+07
TIMP1_HUMAN	Metalloproteinase inhibitor 1 OS=Homo sapiens GN=TIMP1 PE=1 SV=1	9	446.08	1.79467e+07	1.37422e+07	1.40422e+07	1.52437e+07
PTX3_HUMAN	Pentraxin-related protein PTX3 OS=Homo sapiens GN=PTX3 PE=1 SV=3	15	901.14	1.54385e+07	1.11705e+07	1.14961e+07	1.27017e+07
FINC_HUMAN	Fibronectin OS=Homo sapiens GN=FN1 PE=1 SV=4	59	3015.54	1.12594e+07	1.2783e+07	1.1268e+07	1.17701e+07
C1R_HUMAN	Complement C1r subcomponent OS=Homo sapiens GN=C1R PE=1 SV=2	29	1511.67	1.01542e+07	7.92165e+06	8.94122e+06	9.00568e+06
PCOC1_HUMAN	Procollagen C-endopeptidase enhancer 1 OS=Homo sapiens GN=PCOLCE PE=1 SV=2	19	962.47	8.21958e+06	8.43802e+06	7.06244e+06	7.90668e+06
MMP2_HUMAN	72 kDa type IV collagenase OS=Homo sapiens GN=MMP2 PE=1 SV=2	36	1715.92	6.89984e+06	8.09204e+06	6.35764e+06	7.11651e+06
CO3_HUMAN	Complement C3 OS=Homo sapiens GN=C3 PE=1 SV=2	55	2612.93	5.35973e+06	5.92714e+06	4.82415e+06	5.37034e+06
PGS2_HUMAN	Decorin OS=Homo sapiens GN=DCN PE=1 SV=1	21	1002.48	4.77406e+06	6.32711e+06	4.14976e+06	5.08364e+06
FBLN1_HUMAN	Fibulin-1 OS=Homo sapiens GN=FBLN1 PE=1 SV=4	21	1126.34	5.0586e+06	4.94545e+06	4.81995e+06	4.94133e+06
BGH3_HUMAN	Transforming growth factor-beta-induced protein ig-h3 OS=Homo sapiens GN=TGFBI PE=1 SV=1	25	1167.75	4.96182e+06	5.80062e+06	4.01857e+06	4.927e+06
C1S_HUMAN	Complement C1s subcomponent OS=Homo sapiens GN=C1S PE=1 SV=1	29	1436.16	4.39238e+06	5.46943e+06	4.47881e+06	4.78021e+06
TSP1_HUMAN	Thrombospondin-1 OS=Homo sapiens GN=THBS1 PE=1 SV=2	40	2186.63	5.09548e+06	5.04934e+06	4.14621e+06	4.76367e+06
CO1A1_HUMAN	Collagen alpha-1(I) chain OS=Homo sapiens GN=COL1A1 PE=1 SV=5	43	1992.32	3.84752e+06	5.21119e+06	4.03777e+06	4.3655e+06
CO6A1_HUMAN	Collagen alpha-1(VI) chain OS=Homo sapiens GN=COL6A1 PE=1 SV=3	28	1347.67	3.34279e+06	4.11734e+06	3.62525e+06	3.69513e+06
GDN_HUMAN	Glia-derived nexin OS=Homo sapiens GN=SERPINE2 PE=1 SV=1	19	959.15	3.9982e+06	3.63061e+06	3.28893e+06	3.63925e+06
VIME_HUMAN	Vimentin OS=Homo sapiens GN=VIM PE=1 SV=4	41	2000.4	3.37185e+06	3.78195e+06	2.91532e+06	3.35637e+06
ACTB_HUMAN	Actin, cytoplasmic 1 OS=Homo sapiens GN=ACTB PE=1 SV=1	6	848.99	3.43902e+06	3.35309e+06	2.64607e+06	3.14606e+06
COCA1_HUMAN	Collagen alpha-1(XII) chain OS=Homo sapiens GN=COL12A1 PE=1 SV=2	70	3196.23	2.82301e+06	3.3909e+06	2.87923e+06	3.03105e+06
SPRC_HUMAN	SPARC OS=Homo sapiens GN=SPARC PE=1 SV=1	13	543.92	2.42076e+06	2.68792e+06	2.56764e+06	2.55877e+06
ALBU_HUMAN	Serum albumin OS=Homo sapiens GN=ALB PE=1 SV=2	6	288.15	1.92161e+06	3.67712e+06	1.58108e+06	2.39327e+06
KPYM_HUMAN	Pyruvate kinase PKM OS=Homo sapiens GN=PKM PE=1 SV=4	18	898.65	2.19994e+06	2.55839e+06	2.07919e+06	2.27917e+06
MFGM_HUMAN	Lactadherin OS=Homo sapiens GN=MFGE8 PE=1 SV=2	14	834.19	2.61572e+06	1.99797e+06	2.10296e+06	2.23888e+06
FETUA_HUMAN	Alpha-2-HS-glycoprotein OS=Homo sapiens GN=AHSG PE=1 SV=1	3	215.83	2.0637e+06	2.85295e+06	1.79317e+06	2.2366e+06
LMNA_HUMAN	Prelamin-A/C OS=Homo sapiens GN=LMNA PE=1 SV=1	37	1803.18	2.07942e+06	2.36179e+06	1.91452e+06	2.11857e+06
CFAB_HUMAN	Complement factor B OS=Homo sapiens GN=CFB PE=1 SV=2	24	1086	1.95862e+06	2.17817e+06	1.88898e+06	2.00859e+06
HMGC2_HUMAN	3-hydroxymethyl-3-methylglutaryl-CoA lyase, cytoplasmic OS=Homo sapiens GN=HMGCLL1 PE=1 SV=3	1	28.09	1.97439e+06	2.3087e+06	1.60907e+06	1.96405e+06
G3P_HUMAN	Glyceraldehyde-3-phosphate dehydrogenase OS=Homo sapiens GN=GAPDH PE=1 SV=3	11	553.01	2.01133e+06	1.99485e+06	1.76653e+06	1.92424e+06
CATB_HUMAN	Cathepsin B OS=Homo sapiens GN=CTSB PE=1 SV=3	14	635.3	1.8171e+06	1.77679e+06	1.73072e+06	1.77487e+06
QSOX1_HUMAN	Sulfhydryl oxidase 1 OS=Homo sapiens GN=QSOX1 PE=1 SV=3	28	1410.62	1.61957e+06	1.51282e+06	1.51074e+06	1.54771e+06
PEDF_HUMAN	Pigment epithelium-derived factor OS=Homo sapiens GN=SERPINF1 PE=1 SV=4	14	737.18	1.30012e+06	1.81215e+06	1.20592e+06	1.4394e+06
FLNA_HUMAN	Filamin-A OS=Homo sapiens GN=FLNA PE=1 SV=4	44	1872	1.35812e+06	1.57101e+06	1.30111e+06	1.41008e+06
IBP7_HUMAN	Insulin-like growth factor-binding protein 7 OS=Homo sapiens GN=IGFBP7 PE=1 SV=1	16	796.77	1.26144e+06	1.60115e+06	1.34826e+06	1.40362e+06
PAI1_HUMAN	Plasminogen activator inhibitor 1 OS=Homo sapiens GN=SERPINE1 PE=1 SV=1	6	330.22	1.41307e+06	1.45026e+06	1.21056e+06	1.35796e+06
LAMB2_HUMAN	Laminin subunit beta-2 OS=Homo sapiens GN=LAMB2 PE=1 SV=2	27	1297.31	1.19553e+06	1.45723e+06	1.18261e+06	1.27846e+06
GRP78_HUMAN	78 kDa glucose-regulated protein OS=Homo sapiens GN=HSPA5 PE=1 SV=2	21	1136.91	1.15875e+06	1.48689e+06	1.12416e+06	1.2566e+06
MMP3_HUMAN	Stromelysin-1 OS=Homo sapiens GN=MMP3 PE=1 SV=2	18	971.32	1.16872e+06	1.2358e+06	1.31422e+06	1.23958e+06
TRFL_HUMAN	Lactotransferrin OS=Homo sapiens GN=LTF PE=1 SV=6	4	150.05	1.16238e+06	1.71283e+06	714177	1.19646e+06
ANXA2_HUMAN	Annexin A2 OS=Homo sapiens GN=ANXA2 PE=1 SV=2	13	755.74	1.3562e+06	1.1186e+06	1.09712e+06	1.19064e+06
CO6A3_HUMAN	Collagen alpha-3(VI) chain OS=Homo sapiens GN=COL6A3 PE=1 SV=5	59	2724.17	1.1683e+06	1.23228e+06	1.13961e+06	1.18006e+06
ENPL_HUMAN	Endoplasmin OS=Homo sapiens GN=HSP90B1 PE=1 SV=1	23	1121.52	1.06762e+06	1.29148e+06	1.07732e+06	1.14547e+06
CO9_HUMAN	Complement component C9 OS=Homo sapiens GN=C9 PE=1 SV=2	2	109.51	1.22537e+06	923504	976296	1.04172e+06
CO6A2_HUMAN	Collagen alpha-2(VI) chain OS=Homo sapiens GN=COL6A2 PE=1 SV=4	23	1091.94	934706	1.17122e+06	907103	1.00434e+06
GELS_HUMAN	Gelsolin OS=Homo sapiens GN=GSN PE=1 SV=1	17	742.45	975142	1.09288e+06	894985	987668
SERPH_HUMAN	Serpin H1 OS=Homo sapiens GN=SERPINH1 PE=1 SV=2	13	611.7	965403	917809	837934	907049
CLUS_HUMAN	Clusterin OS=Homo sapiens GN=CLU PE=1 SV=1	12	578.27	779454	1.00668e+06	747002	844379
LDHA_HUMAN	L-lactate dehydrogenase A chain OS=Homo sapiens GN=LDHA PE=1 SV=2	10	657.56	800181	927455	682227	803288
LG3BP_HUMAN	Galectin-3-binding protein OS=Homo sapiens GN=LGALS3BP PE=1 SV=1	13	681.34	820865	813599	731220	788562
ENOA_HUMAN	Alpha-enolase OS=Homo sapiens GN=ENO1 PE=1 SV=2	12	628.78	673342	902352	656380	744025
TSP2_HUMAN	Thrombospondin-2 OS=Homo sapiens GN=THBS2 PE=1 SV=2	27	1601.45	689108	887895	638866	738623
HTRA1_HUMAN	Serine protease HTRA1 OS=Homo sapiens GN=HTRA1 PE=1 SV=1	11	437.8	804854	645336	678810	709667
CO3A1_HUMAN	Collagen alpha-1(III) chain OS=Homo sapiens GN=COL3A1 PE=1 SV=4	19	855.62	683625	800467	635622	706572
TENA_HUMAN	Tenascin OS=Homo sapiens GN=TNC PE=1 SV=3	21	1039.02	637395	827699	653118	706070
RF1M_HUMAN	Peptide chain release factor 1, mitochondrial OS=Homo sapiens GN=MTRF1 PE=1 SV=2	1	20.85	612533	490124	843224	648627
LEG1_HUMAN	Galectin-1 OS=Homo sapiens GN=LGALS1 PE=1 SV=2	8	341.81	676063	738577	495323	636654
HSP7C_HUMAN	Heat shock cognate 71 kDa protein OS=Homo sapiens GN=HSPA8 PE=1 SV=1	15	1090.52	563597	679615	511465	584893
POF1B_HUMAN	Protein POF1B OS=Homo sapiens GN=POF1B PE=1 SV=3	1	22.84	487610	781362	435166	568046
HSP74_HUMAN	Heat shock 70 kDa protein 4 OS=Homo sapiens GN=HSPA4 PE=1 SV=4	2	67.84	428956	926983	265419	540453
TBB5_HUMAN	Tubulin beta chain OS=Homo sapiens GN=TUBB PE=1 SV=2	3	693.63	505769	639656	442978	529468
LAMC1_HUMAN	Laminin subunit gamma-1 OS=Homo sapiens GN=LAMC1 PE=1 SV=3	15	702.19	425008	578088	416658	473251
CALR_HUMAN	Calreticulin OS=Homo sapiens GN=CALR PE=1 SV=1	8	392.52	495300	441440	454908	463883
MASP1_HUMAN	Mannan-binding lectin serine protease 1 OS=Homo sapiens GN=MASP1 PE=1 SV=3	7	380.95	435045	513097	394238	447460
EF2_HUMAN	Elongation factor 2 OS=Homo sapiens GN=EEF2 PE=1 SV=4	15	579.13	462666	424620	375820	421035
HS90B_HUMAN	Heat shock protein HSP 90-beta OS=Homo sapiens GN=HSP90AB1 PE=1 SV=4	12	884.06	420559	442572	375937	413023
ANXA5_HUMAN	Annexin A5 OS=Homo sapiens GN=ANXA5 PE=1 SV=2	13	522.91	409698	434514	360398	401537
TERA_HUMAN	Transitional endoplasmic reticulum ATPase OS=Homo sapiens GN=VCP PE=1 SV=4	13	577.69	411738	368509	413518	397922
ALDOA_HUMAN	Fructose-bisphosphate aldolase A OS=Homo sapiens GN=ALDOA PE=1 SV=2	11	574.38	333797	455973	388141	392637
OLFL3_HUMAN	Olfactomedin-like protein 3 OS=Homo sapiens GN=OLFML3 PE=2 SV=1	11	506.87	356905	409481	402199	389528
FBLN5_HUMAN	Fibulin-5 OS=Homo sapiens GN=FBLN5 PE=1 SV=1	5	224.02	426633	328379	379361	378124
PGBM_HUMAN	Basement membrane-specific heparan sulfate proteoglycan core protein OS=Homo sapiens GN=HSPG2 PE=1 SV=4	22	988.07	372420	377464	347769	365884
PDIA3_HUMAN	Protein disulfide-isomerase A3 OS=Homo sapiens GN=PDIA3 PE=1 SV=4	13	543.28	360622	369270	351475	360456
FSTL1_HUMAN	Follistatin-related protein 1 OS=Homo sapiens GN=FSTL1 PE=1 SV=1	10	453.72	364885	358129	357997	360337
PROF1_HUMAN	Profilin-1 OS=Homo sapiens GN=PFN1 PE=1 SV=2	5	217.36	361445	386419	266014	337959
ENPP2_HUMAN	Ectonucleotide pyrophosphatase/phosphodiesterase family member 2 OS=Homo sapiens GN=ENPP2 PE=1 SV=3	4	157.9	414811	360529	204636	326659
TPIS_HUMAN	Triosephosphate isomerase OS=Homo sapiens GN=TPI1 PE=1 SV=3	9	413.4	304330	377318	295458	325702
FBLN4_HUMAN	EGF-containing fibulin-like extracellular matrix protein 2 OS=Homo sapiens GN=EFEMP2 PE=1 SV=3	4	167.06	334890	334760	306735	325462
PPIB_HUMAN	Peptidyl-prolyl cis-trans isomerase B OS=Homo sapiens GN=PPIB PE=1 SV=2	6	285.99	318006	402152	249482	323213
SODE_HUMAN	Extracellular superoxide dismutase [Cu-Zn] OS=Homo sapiens GN=SOD3 PE=1 SV=2	7	333.45	326469	297936	332476	318960
OVOS1_HUMAN	Ovostatin homolog 1 OS=Homo sapiens GN=OVOS1 PE=2 SV=2	1	22.79	240026	489139	208201	312456
CSPG2_HUMAN	Versican core protein OS=Homo sapiens GN=VCAN PE=1 SV=3	8	319.28	292180	229932	413598	311903
TKT_HUMAN	Transketolase OS=Homo sapiens GN=TKT PE=1 SV=3	11	465.54	293090	312570	276745	294135
PLOD1_HUMAN	Procollagen-lysine,2-oxoglutarate 5-dioxygenase 1 OS=Homo sapiens GN=PLOD1 PE=1 SV=2	7	299.98	288919	305287	265678	286628
RS27A_HUMAN	Ubiquitin-40S ribosomal protein S27a OS=Homo sapiens GN=RPS27A PE=1 SV=2	3	75.5	263630	367733	206808	279390
MLH1_HUMAN	DNA mismatch repair protein Mlh1 OS=Homo sapiens GN=MLH1 PE=1 SV=1	2	51.11	197313	388917	240062	275431
TIMP2_HUMAN	Metalloproteinase inhibitor 2 OS=Homo sapiens GN=TIMP2 PE=1 SV=2	8	361.17	252515	377530	193814	274620
CPXM2_HUMAN	Inactive carboxypeptidase-like protein X2 OS=Homo sapiens GN=CPXM2 PE=2 SV=3	7	330.16	307811	243865	268218	273298
CTHR1_HUMAN	Collagen triple helix repeat-containing protein 1 OS=Homo sapiens GN=CTHRC1 PE=1 SV=1	6	246.26	249799	280679	252270	260916
FBLN3_HUMAN	EGF-containing fibulin-like extracellular matrix protein 1 OS=Homo sapiens GN=EFEMP1 PE=1 SV=2	9	399.51	249793	263934	266149	259959
PXDN_HUMAN	Peroxidasin homolog OS=Homo sapiens GN=PXDN PE=1 SV=2	15	631.15	228119	304024	247143	259762
FBN1_HUMAN	Fibrillin-1 OS=Homo sapiens GN=FBN1 PE=1 SV=3	7	286.72	261439	272957	233517	255971
PDIA1_HUMAN	Protein disulfide-isomerase OS=Homo sapiens GN=P4HB PE=1 SV=3	10	526.11	235470	295086	237147	255901
ITIH2_HUMAN	Inter-alpha-trypsin inhibitor heavy chain H2 OS=Homo sapiens GN=ITIH2 PE=1 SV=2	5	201.54	229126	328272	206260	254553
FBLN2_HUMAN	Fibulin-2 OS=Homo sapiens GN=FBLN2 PE=1 SV=2	10	496.07	267490	268685	224886	253687
HSPB1_HUMAN	Heat shock protein beta-1 OS=Homo sapiens GN=HSPB1 PE=1 SV=2	7	352.7	263117	281115	215942	253391
HS90A_HUMAN	Heat shock protein HSP 90-alpha OS=Homo sapiens GN=HSP90AA1 PE=1 SV=5	6	623.67	249283	251410	212844	237845
LDHB_HUMAN	L-lactate dehydrogenase B chain OS=Homo sapiens GN=LDHB PE=1 SV=2	6	359.55	225142	273641	212992	237259
LAMA4_HUMAN	Laminin subunit alpha-4 OS=Homo sapiens GN=LAMA4 PE=1 SV=4	12	426.35	209621	254021	240509	234717
ANT3_HUMAN	Antithrombin-III OS=Homo sapiens GN=SERPINC1 PE=1 SV=1	2	120.07	221751	289961	187105	232939
PRDX1_HUMAN	Peroxiredoxin-1 OS=Homo sapiens GN=PRDX1 PE=1 SV=1	4	263.23	253790	260811	184032	232878
FNBP4_HUMAN	Formin-binding protein 4 OS=Homo sapiens GN=FNBP4 PE=1 SV=3	1	21.03	292833	214449	185791	231024
LOXL2_HUMAN	Lysyl oxidase homolog 2 OS=Homo sapiens GN=LOXL2 PE=1 SV=1	10	390.12	220435	261522	200912	227623
CATZ_HUMAN	Cathepsin Z OS=Homo sapiens GN=CTSZ PE=1 SV=1	7	302.45	208924	256213	209580	224906
NUCL_HUMAN	Nucleolin OS=Homo sapiens GN=NCL PE=1 SV=3	12	490.07	214197	222775	234491	223821
SRPX_HUMAN	Sushi repeat-containing protein SRPX OS=Homo sapiens GN=SRPX PE=1 SV=1	9	367.24	209609	252648	193722	218660
ATPA_HUMAN	ATP synthase subunit alpha, mitochondrial OS=Homo sapiens GN=ATP5A1 PE=1 SV=1	11	444.81	228562	242088	183893	218181
PLEC_HUMAN	Plectin OS=Homo sapiens GN=PLEC PE=1 SV=3	18	711	208825	234440	202277	215181
CALU_HUMAN	Calumenin OS=Homo sapiens GN=CALU PE=1 SV=2	10	409.12	182415	252572	205979	213655
GAS6_HUMAN	Growth arrest-specific protein 6 OS=Homo sapiens GN=GAS6 PE=1 SV=2	8	404.75	205858	232328	199117	212434
VASN_HUMAN	Vasorin OS=Homo sapiens GN=VASN PE=1 SV=1	7	392.02	213142	224823	197277	211747
ACTN1_HUMAN	Alpha-actinin-1 OS=Homo sapiens GN=ACTN1 PE=1 SV=2	8	915.57	233066	173574	215112	207251
ACTN4_HUMAN	Alpha-actinin-4 OS=Homo sapiens GN=ACTN4 PE=1 SV=2	13	1021.7	211249	210939	193098	205095
FSCN1_HUMAN	Fascin OS=Homo sapiens GN=FSCN1 PE=1 SV=3	10	374.22	197442	207260	208769	204491
CBPE_HUMAN	Carboxypeptidase E OS=Homo sapiens GN=CPE PE=1 SV=1	9	328.11	232269	163116	211823	202403
CATL1_HUMAN	Cathepsin L1 OS=Homo sapiens GN=CTSL PE=1 SV=2	2	89.63	203760	242113	160071	201981
TR11B_HUMAN	Tumor necrosis factor receptor superfamily member 11B OS=Homo sapiens GN=TNFRSF11B PE=1 SV=3	4	168.5	194678	171066	222711	196152
5NTD_HUMAN	5'-nucleotidase OS=Homo sapiens GN=NT5E PE=1 SV=1	7	309.53	188125	214491	175200	192605
VTNC_HUMAN	Vitronectin OS=Homo sapiens GN=VTN PE=1 SV=1	1	52.83	232858	134856	206559	191424
POSTN_HUMAN	Periostin OS=Homo sapiens GN=POSTN PE=1 SV=2	15	707.5	202970	180675	186713	190120
ROA2_HUMAN	Heterogeneous nuclear ribonucleoproteins A2/B1 OS=Homo sapiens GN=HNRNPA2B1 PE=1 SV=2	8	300.51	197802	207097	164275	189724
EF1A1_HUMAN	Elongation factor 1-alpha 1 OS=Homo sapiens GN=EEF1A1 PE=1 SV=1	2	328.88	273290	113084	181743	189373
PDIA6_HUMAN	Protein disulfide-isomerase A6 OS=Homo sapiens GN=PDIA6 PE=1 SV=1	5	350.38	201897	180610	183243	188584
ANXA1_HUMAN	Annexin A1 OS=Homo sapiens GN=ANXA1 PE=1 SV=2	10	439.04	170630	222375	165448	186151
INP4B_HUMAN	Type II inositol 3,4-bisphosphate 4-phosphatase OS=Homo sapiens GN=INPP4B PE=2 SV=4	1	20.95	166935	283222	103563	184573
GDIR1_HUMAN	Rho GDP-dissociation inhibitor 1 OS=Homo sapiens GN=ARHGDIA PE=1 SV=3	2	93.05	182080	215370	146794	181415
TBA1B_HUMAN	Tubulin alpha-1B chain OS=Homo sapiens GN=TUBA1B PE=1 SV=1	1	568.26	224272	138207	176566	179682
LAMB1_HUMAN	Laminin subunit beta-1 OS=Homo sapiens GN=LAMB1 PE=1 SV=2	10	341.45	161948	198698	164201	174949
CATK_HUMAN	Cathepsin K OS=Homo sapiens GN=CTSK PE=1 SV=1	6	230.93	174698	179983	161702	172128
NPIA1_HUMAN	Nuclear pore complex-interacting protein family member A1 OS=Homo sapiens GN=NPIPA1 PE=2 SV=3	1	23.96	183247	148869	181846	171320
AEBP1_HUMAN	Adipocyte enhancer-binding protein 1 OS=Homo sapiens GN=AEBP1 PE=1 SV=1	10	446.23	149312	196458	160308	168693
HNRPK_HUMAN	Heterogeneous nuclear ribonucleoprotein K OS=Homo sapiens GN=HNRNPK PE=1 SV=1	5	247.77	174834	199281	130511	168209
AHNK_HUMAN	Neuroblast differentiation-associated protein AHNAK OS=Homo sapiens GN=AHNAK PE=1 SV=2	11	424.78	166007	187130	148796	167311
NID2_HUMAN	Nidogen-2 OS=Homo sapiens GN=NID2 PE=1 SV=3	17	747.36	154290	182562	163518	166790
ARP3_HUMAN	Actin-related protein 3 OS=Homo sapiens GN=ACTR3 PE=1 SV=3	3	67.32	171566	211277	109775	164206
EDIL3_HUMAN	EGF-like repeat and discoidin I-like domain-containing protein 3 OS=Homo sapiens GN=EDIL3 PE=1 SV=1	7	252.74	151112	188284	152010	163802
ATPB_HUMAN	ATP synthase subunit beta, mitochondrial OS=Homo sapiens GN=ATP5B PE=1 SV=3	7	361.39	150219	188402	132620	157080
TSG6_HUMAN	Tumor necrosis factor-inducible gene 6 protein OS=Homo sapiens GN=TNFAIP6 PE=1 SV=2	5	234.22	151669	185599	124741	154003
TBX3_HUMAN	T-box transcription factor TBX3 OS=Homo sapiens GN=TBX3 PE=1 SV=4	1	26.21	143035	169312	148119	153489
RINI_HUMAN	Ribonuclease inhibitor OS=Homo sapiens GN=RNH1 PE=1 SV=2	9	458.13	162276	170159	126977	153137
PGS1_HUMAN	Biglycan OS=Homo sapiens GN=BGN PE=1 SV=2	5	206.3	139000	184043	124959	149334
PDIA4_HUMAN	Protein disulfide-isomerase A4 OS=Homo sapiens GN=PDIA4 PE=1 SV=2	10	431.44	131920	158332	154457	148237
MEP1A_HUMAN	Meprin A subunit alpha OS=Homo sapiens GN=MEP1A PE=1 SV=2	1	23.53	176023	123959	142296	147426
HNRH1_HUMAN	Heterogeneous nuclear ribonucleoprotein H OS=Homo sapiens GN=HNRNPH1 PE=1 SV=4	4	177.37	154424	162590	124556	147190
PLTP_HUMAN	Phospholipid transfer protein OS=Homo sapiens GN=PLTP PE=1 SV=1	6	262.73	157357	134817	131091	141088
IC1_HUMAN	Plasma protease C1 inhibitor OS=Homo sapiens GN=SERPING1 PE=1 SV=2	4	162.27	118503	176329	128406	141079
SODC_HUMAN	Superoxide dismutase [Cu-Zn] OS=Homo sapiens GN=SOD1 PE=1 SV=2	6	252.21	139352	176582	102044	139326
PLOD3_HUMAN	Procollagen-lysine,2-oxoglutarate 5-dioxygenase 3 OS=Homo sapiens GN=PLOD3 PE=1 SV=1	9	431.76	128192	149503	134093	137262
SYNE2_HUMAN	Nesprin-2 OS=Homo sapiens GN=SYNE2 PE=1 SV=3	1	26.85	118031	176542	116854	137142
APOA1_HUMAN	Apolipoprotein A-I OS=Homo sapiens GN=APOA1 PE=1 SV=1	1	37.35	155578	156456	97981.6	136672
CASP2_HUMAN	Caspase-2 OS=Homo sapiens GN=CASP2 PE=1 SV=2	1	21.56	159254	124962	124727	136314
LOXL1_HUMAN	Lysyl oxidase homolog 1 OS=Homo sapiens GN=LOXL1 PE=1 SV=2	6	232.04	131849	135463	140728	136013
THY1_HUMAN	Thy-1 membrane glycoprotein OS=Homo sapiens GN=THY1 PE=1 SV=2	3	166.47	137127	144486	126036	135883
GRP75_HUMAN	Stress-70 protein, mitochondrial OS=Homo sapiens GN=HSPA9 PE=1 SV=2	12	605.22	124080	151786	127907	134591
GPC1_HUMAN	Glypican-1 OS=Homo sapiens GN=GPC1 PE=1 SV=2	7	254.58	143799	149623	109000	134141
MOES_HUMAN	Moesin OS=Homo sapiens GN=MSN PE=1 SV=3	5	353.54	155030	111939	132991	133320
CC171_HUMAN	Coiled-coil domain-containing protein 171 OS=Homo sapiens GN=CCDC171 PE=2 SV=1	2	54.74	144313	151234	98524.4	131357
SMRD2_HUMAN	SWI/SNF-related matrix-associated actin-dependent regulator of chromatin subfamily D member 2 OS=Homo sapiens GN=SMARCD2 PE=1 SV=3	1	20.46	129847	150322	111337	130502
FKB10_HUMAN	Peptidyl-prolyl cis-trans isomerase FKBP10 OS=Homo sapiens GN=FKBP10 PE=1 SV=1	9	335.34	171290	94510.8	122150	129317
RS3_HUMAN	40S ribosomal protein S3 OS=Homo sapiens GN=RPS3 PE=1 SV=2	5	255.58	145356	128863	108946	127722
MA1A1_HUMAN	Mannosyl-oligosaccharide 1,2-alpha-mannosidase IA OS=Homo sapiens GN=MAN1A1 PE=1 SV=3	5	225.47	143148	117451	121953	127518
BAG2_HUMAN	BAG family molecular chaperone regulator 2 OS=Homo sapiens GN=BAG2 PE=1 SV=1	3	114.92	148495	166845	61216.5	125519
ANGL2_HUMAN	Angiopoietin-related protein 2 OS=Homo sapiens GN=ANGPTL2 PE=1 SV=1	11	521.1	123555	124048	127554	125053
CLIC1_HUMAN	Chloride intracellular channel protein 1 OS=Homo sapiens GN=CLIC1 PE=1 SV=4	6	234.47	123466	151408	94435.6	123103
IF4A1_HUMAN	Eukaryotic initiation factor 4A-I OS=Homo sapiens GN=EIF4A1 PE=1 SV=1	6	252.14	135069	125686	102308	121021
6PGD_HUMAN	6-phosphogluconate dehydrogenase, decarboxylating OS=Homo sapiens GN=PGD PE=1 SV=3	7	268.01	115737	117734	128334	120602
IBP2_HUMAN	Insulin-like growth factor-binding protein 2 OS=Homo sapiens GN=IGFBP2 PE=1 SV=2	7	322.57	122806	107390	131405	120534
ZN362_HUMAN	Zinc finger protein 362 OS=Homo sapiens GN=ZNF362 PE=1 SV=1	1	31.62	9725.8	343635	6250.37	119870
CD44_HUMAN	CD44 antigen OS=Homo sapiens GN=CD44 PE=1 SV=3	6	287.71	127616	90682.8	139277	119192
P3H1_HUMAN	Prolyl 3-hydroxylase 1 OS=Homo sapiens GN=P3H1 PE=1 SV=2	6	234.89	130638	114006	112709	119118
GANAB_HUMAN	Neutral alpha-glucosidase AB OS=Homo sapiens GN=GANAB PE=1 SV=3	11	348.3	123332	125772	107535	118880
COR1C_HUMAN	Coronin-1C OS=Homo sapiens GN=CORO1C PE=1 SV=1	7	413.1	141280	88411.7	123679	117790
HEXA_HUMAN	Beta-hexosaminidase subunit alpha OS=Homo sapiens GN=HEXA PE=1 SV=2	9	376.37	111291	111422	126716	116476
CO5A1_HUMAN	Collagen alpha-1(V) chain OS=Homo sapiens GN=COL5A1 PE=1 SV=3	6	190.89	120155	106700	121701	116185
PGK1_HUMAN	Phosphoglycerate kinase 1 OS=Homo sapiens GN=PGK1 PE=1 SV=3	8	357.75	101566	126831	118387	115595
RSSA_HUMAN	40S ribosomal protein SA OS=Homo sapiens GN=RPSA PE=1 SV=4	3	126.05	85930	163072	80884.5	109962
GNAI2_HUMAN	Guanine nucleotide-binding protein G(i) subunit alpha-2 OS=Homo sapiens GN=GNAI2 PE=1 SV=3	5	182.34	107268	112812	108456	109512
FST_HUMAN	Follistatin OS=Homo sapiens GN=FST PE=1 SV=2	5	223.39	140111	40916.5	129058	103362
TCPG_HUMAN	T-complex protein 1 subunit gamma OS=Homo sapiens GN=CCT3 PE=1 SV=4	6	228.88	109194	115004	84714.6	102971
MDHM_HUMAN	Malate dehydrogenase, mitochondrial OS=Homo sapiens GN=MDH2 PE=1 SV=3	8	317.65	98720.6	112282	95346.7	102116
TUT7_HUMAN	Terminal uridylyltransferase 7 OS=Homo sapiens GN=ZCCHC6 PE=1 SV=1	1	61.07	97998.4	111902	95809.5	101903
CLIC4_HUMAN	Chloride intracellular channel protein 4 OS=Homo sapiens GN=CLIC4 PE=1 SV=4	3	150.63	107080	84737.8	112745	101521
PPIA_HUMAN	Peptidyl-prolyl cis-trans isomerase A OS=Homo sapiens GN=PPIA PE=1 SV=2	7	239.04	125336	85811.5	88871.6	100006
ROA1_HUMAN	Heterogeneous nuclear ribonucleoprotein A1 OS=Homo sapiens GN=HNRNPA1 PE=1 SV=5	4	178.23	92638.4	106671	94651.5	97987
ISLR_HUMAN	Immunoglobulin superfamily containing leucine-rich repeat protein OS=Homo sapiens GN=C PE=2 SV=1	2	84.53	99041	116122	77828	97663.6
ANXA6_HUMAN	Annexin A6 OS=Homo sapiens GN=ANXA6 PE=1 SV=3	10	395.32	102397	101103	88236.5	97245.7
GSTP1_HUMAN	Glutathione S-transferase P OS=Homo sapiens GN=GSTP1 PE=1 SV=2	3	149.6	119210	80452	91956.7	97206.3
PENK_HUMAN	Proenkephalin-A OS=Homo sapiens GN=PENK PE=1 SV=1	7	366.83	83359.2	93388.8	114778	97175.2
FBN2_HUMAN	Fibrillin-2 OS=Homo sapiens GN=FBN2 PE=1 SV=3	6	275.79	94626.5	104802	92032.8	97153.7
LYOX_HUMAN	Protein-lysine 6-oxidase OS=Homo sapiens GN=LOX PE=1 SV=2	5	203.82	91098.4	105355	94559.6	97004.2
B4GT1_HUMAN	Beta-1,4-galactosyltransferase 1 OS=Homo sapiens GN=B4GALT1 PE=1 SV=5	6	208.66	111499	71798	105421	96239.2
CAVN1_HUMAN	Caveolae-associated protein 1 OS=Homo sapiens GN=CAVIN1 PE=1 SV=1	4	307.83	107136	87965.1	87752.4	94284.5
UFO_HUMAN	Tyrosine-protein kinase receptor UFO OS=Homo sapiens GN=AXL PE=1 SV=3	3	143.43	112327	87307	82774.5	94136.2
GCNT3_HUMAN	Beta-1,3-galactosyl-O-glycosyl-glycoprotein beta-1,6-N-acetylglucosaminyltransferase 3 OS=Homo sapiens GN=GCNT3 PE=2 SV=1	1	23.45	83901.5	126223	69919.1	93348.1
NID1_HUMAN	Nidogen-1 OS=Homo sapiens GN=NID1 PE=1 SV=3	9	331.69	92918	87992.1	99026.1	93312.1
RLA0_HUMAN	60S acidic ribosomal protein P0 OS=Homo sapiens GN=RPLP0 PE=1 SV=1	6	269.98	90575.2	112631	75867.9	93024.8
UGDH_HUMAN	UDP-glucose 6-dehydrogenase OS=Homo sapiens GN=UGDH PE=1 SV=1	9	316.03	88867.6	102693	84186.6	91915.7
RACK1_HUMAN	Receptor of activated protein C kinase 1 OS=Homo sapiens GN=RACK1 PE=1 SV=3	3	101.93	93693	105280	74166.2	91046.4
ACTA_HUMAN	Actin, aortic smooth muscle OS=Homo sapiens GN=ACTA2 PE=1 SV=1	2	634.58	92740	87519.1	90858.9	90372.6
IMB1_HUMAN	Importin subunit beta-1 OS=Homo sapiens GN=KPNB1 PE=1 SV=2	4	203.71	100362	79612.6	89215	89729.7
GDIB_HUMAN	Rab GDP dissociation inhibitor beta OS=Homo sapiens GN=GDI2 PE=1 SV=2	5	403.02	78263.6	106276	83525.6	89355.1
CSTN1_HUMAN	Calsyntenin-1 OS=Homo sapiens GN=CLSTN1 PE=1 SV=1	7	259.54	85996.3	97851.9	79139.4	87662.5
FMOD_HUMAN	Fibromodulin OS=Homo sapiens GN=FMOD PE=1 SV=2	2	114.69	86579.7	94035.1	81830.3	87481.7
DYH8_HUMAN	Dynein heavy chain 8, axonemal OS=Homo sapiens GN=DNAH8 PE=1 SV=2	1	26.24	57461.1	117860	86716.1	87345.6
EF1G_HUMAN	Elongation factor 1-gamma OS=Homo sapiens GN=EEF1G PE=1 SV=3	6	297.33	92489.1	88328.7	79456.4	86758.1
DPYL2_HUMAN	Dihydropyrimidinase-related protein 2 OS=Homo sapiens GN=DPYSL2 PE=1 SV=1	3	174.75	83757.7	85144.6	88643	85848.4
SPON2_HUMAN	Spondin-2 OS=Homo sapiens GN=SPON2 PE=1 SV=3	3	133.89	80996.2	104339	72144.7	85826.5
EMIL1_HUMAN	EMILIN-1 OS=Homo sapiens GN=EMILIN1 PE=1 SV=3	8	331.32	71200	99760.5	84627.9	85196.1
LUM_HUMAN	Lumican OS=Homo sapiens GN=LUM PE=1 SV=2	7	378.84	75559	82975.9	96505.6	85013.5
COF1_HUMAN	Cofilin-1 OS=Homo sapiens GN=CFL1 PE=1 SV=3	3	87.48	95153.6	87829.3	68369.1	83784
RS8_HUMAN	40S ribosomal protein S8 OS=Homo sapiens GN=RPS8 PE=1 SV=2	3	142.42	97166.6	86249.6	65894.8	83103.7
PSG4_HUMAN	Pregnancy-specific beta-1-glycoprotein 4 OS=Homo sapiens GN=PSG4 PE=2 SV=3	2	261.38	79927.3	84382.5	81911.9	82073.9
HEXB_HUMAN	Beta-hexosaminidase subunit beta OS=Homo sapiens GN=HEXB PE=1 SV=3	9	321.58	78760.4	71068.7	96271	82033.4
CKAP4_HUMAN	Cytoskeleton-associated protein 4 OS=Homo sapiens GN=CKAP4 PE=1 SV=2	8	466.72	86576.7	84835.6	74231	81881.1
MED16_HUMAN	Mediator of RNA polymerase II transcription subunit 16 OS=Homo sapiens GN=MED16 PE=1 SV=2	1	22.41	86143.5	71000.5	86307.9	81150.6
DAG1_HUMAN	Dystroglycan OS=Homo sapiens GN=DAG1 PE=1 SV=2	3	111.86	75270.5	96004.2	70367.6	80547.4
WNT5A_HUMAN	Protein Wnt-5a OS=Homo sapiens GN=WNT5A PE=1 SV=2	6	334.65	81017.9	84589.4	73923.8	79843.7
TBB4B_HUMAN	Tubulin beta-4B chain OS=Homo sapiens GN=TUBB4B PE=1 SV=1	2	558.53	84031.4	87830.9	66982	79614.7
LTBP2_HUMAN	Latent-transforming growth factor beta-binding protein 2 OS=Homo sapiens GN=LTBP2 PE=1 SV=3	6	234.51	69210.8	82242	86820.7	79424.5
CH60_HUMAN	60 kDa heat shock protein, mitochondrial OS=Homo sapiens GN=HSPD1 PE=1 SV=2	8	315.78	78244.2	81760.8	76254.4	78753.1
PCBP1_HUMAN	Poly(rC)-binding protein 1 OS=Homo sapiens GN=PCBP1 PE=1 SV=2	3	166.28	73054.3	103660	59202.2	78638.8
HBA_HUMAN	Hemoglobin subunit alpha OS=Homo sapiens GN=HBA1 PE=1 SV=2	4	120.19	86478.5	84736.1	63036.7	78083.8
UBA1_HUMAN	Ubiquitin-like modifier-activating enzyme 1 OS=Homo sapiens GN=UBA1 PE=1 SV=3	5	274.67	60625.9	97307.6	75112.3	77682
MYH9_HUMAN	Myosin-9 OS=Homo sapiens GN=MYH9 PE=1 SV=4	11	520.5	78680.7	74773.1	79009	77487.6
HNRPC_HUMAN	Heterogeneous nuclear ribonucleoproteins C1/C2 OS=Homo sapiens GN=HNRNPC PE=1 SV=4	5	230.65	107202	64430.3	56240.9	75957.7
PAMR1_HUMAN	Inactive serine protease PAMR1 OS=Homo sapiens GN=PAMR1 PE=1 SV=1	4	153.37	70334	86326.2	70735.7	75798.6
FLNC_HUMAN	Filamin-C OS=Homo sapiens GN=FLNC PE=1 SV=3	9	393.6	61645.4	96833.3	68564.2	75681
DKK3_HUMAN	Dickkopf-related protein 3 OS=Homo sapiens GN=DKK3 PE=1 SV=2	4	204.75	69723.1	83530.2	69964.1	74405.8
WDR1_HUMAN	WD repeat-containing protein 1 OS=Homo sapiens GN=WDR1 PE=1 SV=4	5	182.4	71329	81720.1	69966.9	74338.7
SC23A_HUMAN	Protein transport protein Sec23A OS=Homo sapiens GN=SEC23A PE=1 SV=2	4	139.96	79809.3	78067.8	64473.4	74116.8
IBP5_HUMAN	Insulin-like growth factor-binding protein 5 OS=Homo sapiens GN=IGFBP5 PE=1 SV=1	4	139.86	69871.2	74583.4	77784.2	74079.6
TRFE_HUMAN	Serotransferrin OS=Homo sapiens GN=TF PE=1 SV=3	2	43.7	63585.2	112665	44019.8	73423.4
PKHA6_HUMAN	Pleckstrin homology domain-containing family A member 6 OS=Homo sapiens GN=PLEKHA6 PE=1 SV=4	1	22.76	68304.5	82520.6	67140.3	72655.1
TCPQ_HUMAN	T-complex protein 1 subunit theta OS=Homo sapiens GN=CCT8 PE=1 SV=4	4	196.86	77812.7	77912.5	60507.2	72077.5
ECM1_HUMAN	Extracellular matrix protein 1 OS=Homo sapiens GN=ECM1 PE=1 SV=2	5	186.4	67552.4	76109.8	72239.5	71967.2
TRXR1_HUMAN	Thioredoxin reductase 1, cytoplasmic OS=Homo sapiens GN=TXNRD1 PE=1 SV=3	6	198.66	110918	33256	70200.1	71457.9
VINC_HUMAN	Vinculin OS=Homo sapiens GN=VCL PE=1 SV=4	4	156.68	72397.6	53847.5	83759.4	70001.5
DDAH2_HUMAN	N(G),N(G)-dimethylarginine dimethylaminohydrolase 2 OS=Homo sapiens GN=DDAH2 PE=1 SV=1	2	49.54	58307.5	58980.3	90754.8	69347.5
GARS_HUMAN	Glycine--tRNA ligase OS=Homo sapiens GN=GARS PE=1 SV=3	5	240.61	73766.9	48027.9	81083.2	67626
RS4X_HUMAN	40S ribosomal protein S4, X isoform OS=Homo sapiens GN=RPS4X PE=1 SV=2	4	194.33	75564.7	72831.2	52773.1	67056.3
KIF2C_HUMAN	Kinesin-like protein KIF2C OS=Homo sapiens GN=KIF2C PE=1 SV=2	1	21.74	64750.6	77981.5	56177.6	66303.3
CD166_HUMAN	CD166 antigen OS=Homo sapiens GN=ALCAM PE=1 SV=2	5	203.11	78063.4	18474.3	102355	66297.5
GNS_HUMAN	N-acetylglucosamine-6-sulfatase OS=Homo sapiens GN=GNS PE=1 SV=3	5	192.92	67983	63402.3	66813.6	66066.3
PICAL_HUMAN	Phosphatidylinositol-binding clathrin assembly protein OS=Homo sapiens GN=PICALM PE=1 SV=2	1	31.81	97006.3	12407.6	88650.6	66021.5
SRSF1_HUMAN	Serine/arginine-rich splicing factor 1 OS=Homo sapiens GN=SRSF1 PE=1 SV=2	6	211.44	64243.2	84165.6	48579.6	65662.8
SPON1_HUMAN	Spondin-1 OS=Homo sapiens GN=SPON1 PE=1 SV=2	4	147.01	53872.1	81997.6	58454.5	64774.7
ACADV_HUMAN	Very long-chain specific acyl-CoA dehydrogenase, mitochondrial OS=Homo sapiens GN=ACADVL PE=1 SV=1	2	41.91	84270.6	65949	42412.3	64210.6
IBP4_HUMAN	Insulin-like growth factor-binding protein 4 OS=Homo sapiens GN=IGFBP4 PE=1 SV=2	3	88.77	53781.6	77801.4	58642.9	63408.6
MDHC_HUMAN	Malate dehydrogenase, cytoplasmic OS=Homo sapiens GN=MDH1 PE=1 SV=4	4	146.52	52569.7	88258.4	47774.4	62867.5
SHRM3_HUMAN	Protein Shroom3 OS=Homo sapiens GN=SHROOM3 PE=1 SV=2	2	61.5	56067.5	59382.3	71914.5	62454.8
KCD12_HUMAN	BTB/POZ domain-containing protein KCTD12 OS=Homo sapiens GN=KCTD12 PE=1 SV=1	5	174.68	70112.2	61121.5	56018.8	62417.5
SHOC2_HUMAN	Leucine-rich repeat protein SHOC-2 OS=Homo sapiens GN=SHOC2 PE=1 SV=2	1	39.38	59109	45446.3	82144.6	62233.3
PPGB_HUMAN	Lysosomal protective protein OS=Homo sapiens GN=CTSA PE=1 SV=2	5	182.74	66415.8	67022.1	51119.7	61519.2
B2MG_HUMAN	Beta-2-microglobulin OS=Homo sapiens GN=B2M PE=1 SV=1	2	74.01	98931.9	20887.9	63473.3	61097.7
NSMA2_HUMAN	Sphingomyelin phosphodiesterase 3 OS=Homo sapiens GN=SMPD3 PE=1 SV=1	1	24.61	68723.8	63792.4	50100.5	60872.2
RPC1_HUMAN	DNA-directed RNA polymerase III subunit RPC1 OS=Homo sapiens GN=POLR3A PE=1 SV=2	1	40.77	90281.4	12611	79392.7	60761.7
LRP1_HUMAN	Prolow-density lipoprotein receptor-related protein 1 OS=Homo sapiens GN=LRP1 PE=1 SV=2	8	274.68	63779.2	52425	64763.9	60322.7
LOXL3_HUMAN	Lysyl oxidase homolog 3 OS=Homo sapiens GN=LOXL3 PE=1 SV=1	3	140.63	63025.1	61460.9	56331.8	60272.6
CAPZB_HUMAN	F-actin-capping protein subunit beta OS=Homo sapiens GN=CAPZB PE=1 SV=4	3	122.84	58297.3	69199.4	51391.6	59629.4
FAM9B_HUMAN	Protein FAM9B OS=Homo sapiens GN=FAM9B PE=1 SV=1	1	27.47	36734.3	107287	34754.7	59592.1
CAP1_HUMAN	Adenylyl cyclase-associated protein 1 OS=Homo sapiens GN=CAP1 PE=1 SV=5	5	198.25	60445.9	65786.9	52438.4	59557.1
KS6A6_HUMAN	Ribosomal protein S6 kinase alpha-6 OS=Homo sapiens GN=RPS6KA6 PE=1 SV=1	1	26.59	54947.1	16359.1	106895	59400.4
HBB_HUMAN	Hemoglobin subunit beta OS=Homo sapiens GN=HBB PE=1 SV=2	2	70.81	74850.2	39255.7	64061.2	59389
CLC11_HUMAN	C-type lectin domain family 11 member A OS=Homo sapiens GN=CLEC11A PE=1 SV=1	5	192.62	49347.2	62362.3	62874.3	58194.6
1433T_HUMAN	14-3-3 protein theta OS=Homo sapiens GN=YWHAQ PE=1 SV=1	5	433.56	60686.2	60194.6	52959.7	57946.8
CATD_HUMAN	Cathepsin D OS=Homo sapiens GN=CTSD PE=1 SV=1	6	229.57	54563.2	63885.5	54382.4	57610.4
HNRPU_HUMAN	Heterogeneous nuclear ribonucleoprotein U OS=Homo sapiens GN=HNRNPU PE=1 SV=6	2	118.42	55469.3	48408.8	67896.7	57258.3
FKBP9_HUMAN	Peptidyl-prolyl cis-trans isomerase FKBP9 OS=Homo sapiens GN=FKBP9 PE=1 SV=2	3	86.52	52704	63845.9	53162.6	56570.8
TGFB1_HUMAN	Transforming growth factor beta-1 OS=Homo sapiens GN=TGFB1 PE=1 SV=2	4	133.14	55768.5	66290.6	47079.8	56379.6
NUCB1_HUMAN	Nucleobindin-1 OS=Homo sapiens GN=NUCB1 PE=1 SV=4	5	233.37	57716.7	57257.8	53227.6	56067.4
HS71L_HUMAN	Heat shock 70 kDa protein 1-like OS=Homo sapiens GN=HSPA1L PE=1 SV=2	1	452.58	55171.2	55315.5	57145.4	55877.4
PRDX6_HUMAN	Peroxiredoxin-6 OS=Homo sapiens GN=PRDX6 PE=1 SV=3	5	210.66	57182.6	61441.7	43832.8	54152.4
NPM_HUMAN	Nucleophosmin OS=Homo sapiens GN=NPM1 PE=1 SV=2	5	219.99	48376	67406.2	46186.3	53989.5
ZN550_HUMAN	Zinc finger protein 550 OS=Homo sapiens GN=ZNF550 PE=1 SV=2	2	64.69	70167.7	43849.3	46973.9	53663.6
PODN_HUMAN	Podocan OS=Homo sapiens GN=PODN PE=1 SV=2	11	413.55	50078.5	59894.6	48693	52888.7
IBP3_HUMAN	Insulin-like growth factor-binding protein 3 OS=Homo sapiens GN=IGFBP3 PE=1 SV=2	4	142.77	44853.9	68711.1	44649.3	52738.1
SVEP1_HUMAN	Sushi, von Willebrand factor type A, EGF and pentraxin domain-containing protein 1 OS=Homo sapiens GN=SVEP1 PE=1 SV=3	8	321.23	51413.6	54738.4	52062.2	52738
PRDX3_HUMAN	Thioredoxin-dependent peroxide reductase, mitochondrial OS=Homo sapiens GN=PRDX3 PE=1 SV=3	4	148.87	74557.5	46681.6	36704.1	52647.7
SFRP4_HUMAN	Secreted frizzled-related protein 4 OS=Homo sapiens GN=SFRP4 PE=1 SV=2	3	182.56	65803	43244	47327	52124.7
1433Z_HUMAN	14-3-3 protein zeta/delta OS=Homo sapiens GN=YWHAZ PE=1 SV=1	5	354.93	54714.2	56321.8	43045.2	51360.4
DSG4_HUMAN	Desmoglein-4 OS=Homo sapiens GN=DSG4 PE=1 SV=1	1	21.76	37575.8	74729.6	39090	50465.1
STAT1_HUMAN	Signal transducer and activator of transcription 1-alpha/beta OS=Homo sapiens GN=STAT1 PE=1 SV=2	4	157.46	47469.5	52361.6	51093.3	50308.1
MFAP4_HUMAN	Microfibril-associated glycoprotein 4 OS=Homo sapiens GN=MFAP4 PE=1 SV=2	3	138.46	96331.8	14609.7	39167.5	50036.3
MYL6_HUMAN	Myosin light polypeptide 6 OS=Homo sapiens GN=MYL6 PE=1 SV=2	5	171.55	52036.2	61491	36534.1	50020.4
A2AP_HUMAN	Alpha-2-antiplasmin OS=Homo sapiens GN=SERPINF2 PE=1 SV=3	1	53.29	46283.3	76215.9	27405.1	49968.1
CO7_HUMAN	Complement component C7 OS=Homo sapiens GN=C7 PE=1 SV=2	1	23.49	52439.9	57862	38409.8	49570.6
GLCM_HUMAN	Glucosylceramidase OS=Homo sapiens GN=GBA PE=1 SV=3	4	184.77	60667.1	43799.8	42806	49091
TCPH_HUMAN	T-complex protein 1 subunit eta OS=Homo sapiens GN=CCT7 PE=1 SV=2	5	192.58	49134.3	53391.5	44243.3	48923
ZBTB4_HUMAN	Zinc finger and BTB domain-containing protein 4 OS=Homo sapiens GN=ZBTB4 PE=1 SV=3	1	20.02	58276.7	28657	58033	48322.2
FETA_HUMAN	Alpha-fetoprotein OS=Homo sapiens GN=AFP PE=1 SV=1	2	80.93	41217.5	69445.8	34163	48275.4
TB182_HUMAN	182 kDa tankyrase-1-binding protein OS=Homo sapiens GN=TNKS1BP1 PE=1 SV=4	2	53.78	34800.5	64097.6	42725	47207.7
STOM_HUMAN	Erythrocyte band 7 integral membrane protein OS=Homo sapiens GN=STOM PE=1 SV=3	3	124.96	53282.3	45469.6	40216.2	46322.7
NPTX1_HUMAN	Neuronal pentraxin-1 OS=Homo sapiens GN=NPTX1 PE=2 SV=2	6	257.37	56676.8	14354.1	67632.2	46221
LSAMP_HUMAN	Limbic system-associated membrane protein OS=Homo sapiens GN=LSAMP PE=1 SV=2	1	32.45	48060.5	27915.6	61635.8	45870.6
CO5_HUMAN	Complement C5 OS=Homo sapiens GN=C5 PE=1 SV=4	1	60.1	44317.4	50378.6	41955.4	45550.5
BMP1_HUMAN	Bone morphogenetic protein 1 OS=Homo sapiens GN=BMP1 PE=1 SV=2	7	238.41	44001.8	53078.7	38861.5	45314
CO6_HUMAN	Complement component C6 OS=Homo sapiens GN=C6 PE=1 SV=3	1	43.97	34286.3	51647.6	49081.8	45005.2
PLOD2_HUMAN	Procollagen-lysine,2-oxoglutarate 5-dioxygenase 2 OS=Homo sapiens GN=PLOD2 PE=1 SV=2	4	221.9	42815.4	53860.7	38252.7	44976.3
TLS1_HUMAN	Telomere length and silencing protein 1 homolog OS=Homo sapiens GN=C9orf78 PE=1 SV=1	1	22.43	46156.7	45749.7	42862.6	44923
DPYL3_HUMAN	Dihydropyrimidinase-related protein 3 OS=Homo sapiens GN=DPYSL3 PE=1 SV=1	4	186.05	39793.1	54476.9	40420.4	44896.8
MXRA5_HUMAN	Matrix-remodeling-associated protein 5 OS=Homo sapiens GN=MXRA5 PE=1 SV=3	8	375.64	39773.4	47493.3	46849	44705.2
RTN4_HUMAN	Reticulon-4 OS=Homo sapiens GN=RTN4 PE=1 SV=2	3	98.73	38972.7	60416	34310.3	44566.3
NR0B1_HUMAN	Nuclear receptor subfamily 0 group B member 1 OS=Homo sapiens GN=NR0B1 PE=1 SV=2	1	21.21	30792.9	79593.5	23257.6	44548
XRCC6_HUMAN	X-ray repair cross-complementing protein 6 OS=Homo sapiens GN=XRCC6 PE=1 SV=2	4	155	46685.5	45181.9	41477.2	44448.2
B3A4_HUMAN	Anion exchange protein 4 OS=Homo sapiens GN=SLC4A9 PE=2 SV=2	1	20.97	37148.9	61366.2	34413.2	44309.4
CYTC_HUMAN	Cystatin-C OS=Homo sapiens GN=CST3 PE=1 SV=1	1	36.52	44449.5	49714.1	38745.7	44303.1
WDR11_HUMAN	WD repeat-containing protein 11 OS=Homo sapiens GN=WDR11 PE=1 SV=1	1	23.76	40843.5	48227.2	42832	43967.6
G6PI_HUMAN	Glucose-6-phosphate isomerase OS=Homo sapiens GN=GPI PE=1 SV=4	3	75.61	35708.2	53392.1	42671.2	43923.8
TCPA_HUMAN	T-complex protein 1 subunit alpha OS=Homo sapiens GN=TCP1 PE=1 SV=1	4	186.04	35151.2	55001.1	41476.5	43876.3
CALD1_HUMAN	Caldesmon OS=Homo sapiens GN=CALD1 PE=1 SV=3	9	427.41	42106.5	39370.1	49583.9	43686.8
STC1_HUMAN	Stanniocalcin-1 OS=Homo sapiens GN=STC1 PE=1 SV=1	2	82.6	34267.7	52481.1	43326.7	43358.5
PEBP1_HUMAN	Phosphatidylethanolamine-binding protein 1 OS=Homo sapiens GN=PEBP1 PE=1 SV=3	3	152.44	39852.4	56259.3	31643.1	42584.9
SODM_HUMAN	Superoxide dismutase [Mn], mitochondrial OS=Homo sapiens GN=SOD2 PE=1 SV=2	4	190.05	55672.2	23029.8	48792.6	42498.2
NB5R3_HUMAN	NADH-cytochrome b5 reductase 3 OS=Homo sapiens GN=CYB5R3 PE=1 SV=3	4	167.9	38406.3	52032.5	36992.4	42477.1
COPB2_HUMAN	Coatomer subunit beta' OS=Homo sapiens GN=COPB2 PE=1 SV=2	4	160.35	40894.1	43959.5	41943.1	42265.6
ADHX_HUMAN	Alcohol dehydrogenase class-3 OS=Homo sapiens GN=ADH5 PE=1 SV=4	2	52.29	48866.4	33571.1	43369.5	41935.7
CO5A2_HUMAN	Collagen alpha-2(V) chain OS=Homo sapiens GN=COL5A2 PE=1 SV=3	8	259.89	30822.8	64454.4	29672.5	41649.9
COEA1_HUMAN	Collagen alpha-1(XIV) chain OS=Homo sapiens GN=COL14A1 PE=1 SV=3	6	234.43	42577.3	37626.6	44625.8	41609.9
TARA_HUMAN	TRIO and F-actin-binding protein OS=Homo sapiens GN=TRIOBP PE=1 SV=3	1	22.37	40470.4	53131.8	29432.5	41011.6
ZN423_HUMAN	Zinc finger protein 423 OS=Homo sapiens GN=ZNF423 PE=1 SV=1	1	27.94	36160	52389.8	32801.1	40450.3
SRPX2_HUMAN	Sushi repeat-containing protein SRPX2 OS=Homo sapiens GN=SRPX2 PE=1 SV=1	2	68.43	35025.2	50007.3	35448.2	40160.2
PLST_HUMAN	Plastin-3 OS=Homo sapiens GN=PLS3 PE=1 SV=4	7	209.44	42803.4	42768.8	34600.4	40057.5
A2MG_HUMAN	Alpha-2-macroglobulin OS=Homo sapiens GN=A2M PE=1 SV=3	2	94.41	31769.4	61200.1	27171.4	40046.9
ARC1B_HUMAN	Actin-related protein 2/3 complex subunit 1B OS=Homo sapiens GN=ARPC1B PE=1 SV=3	4	164.12	36274.2	43312.1	40435.7	40007.3
SPB6_HUMAN	Serpin B6 OS=Homo sapiens GN=SERPINB6 PE=1 SV=3	5	152.6	36046.6	48961.3	34476.7	39828.2
VPS35_HUMAN	Vacuolar protein sorting-associated protein 35 OS=Homo sapiens GN=VPS35 PE=1 SV=2	5	206.91	38255.1	47194.3	33670.1	39706.5
ILF3_HUMAN	Interleukin enhancer-binding factor 3 OS=Homo sapiens GN=ILF3 PE=1 SV=3	5	150.38	34173.1	50930.5	32959.8	39354.5
MMS19_HUMAN	MMS19 nucleotide excision repair protein homolog OS=Homo sapiens GN=MMS19 PE=1 SV=2	1	22.25	33609.6	55973.1	27762.5	39115.1
TCPE_HUMAN	T-complex protein 1 subunit epsilon OS=Homo sapiens GN=CCT5 PE=1 SV=1	4	166.11	36909.9	43236.3	35924.5	38690.2
PDC6I_HUMAN	Programmed cell death 6-interacting protein OS=Homo sapiens GN=PDCD6IP PE=1 SV=1	7	339.15	33300.4	42609.7	38428.6	38112.9
MOT10_HUMAN	Monocarboxylate transporter 10 OS=Homo sapiens GN=SLC16A10 PE=1 SV=1	1	26.58	69013.3	12968.8	32194.5	38058.9
CAD13_HUMAN	Cadherin-13 OS=Homo sapiens GN=CDH13 PE=1 SV=1	4	164.39	33088.5	45472.8	35247.4	37936.2
PRDX2_HUMAN	Peroxiredoxin-2 OS=Homo sapiens GN=PRDX2 PE=1 SV=5	4	195.8	34949.3	47603	30907.1	37819.8
CAPG_HUMAN	Macrophage-capping protein OS=Homo sapiens GN=CAPG PE=1 SV=2	4	166.24	34560.4	50272.6	28527.6	37786.9
MED22_HUMAN	Mediator of RNA polymerase II transcription subunit 22 OS=Homo sapiens GN=MED22 PE=1 SV=2	1	21.38	33143	54646.3	25455.9	37748.4
ILF2_HUMAN	Interleukin enhancer-binding factor 2 OS=Homo sapiens GN=ILF2 PE=1 SV=2	2	102.93	33237.2	49315.9	30564.6	37705.9
CAN2_HUMAN	Calpain-2 catalytic subunit OS=Homo sapiens GN=CAPN2 PE=1 SV=6	6	159.78	35776.2	37088	39909.8	37591.3
AATC_HUMAN	Aspartate aminotransferase, cytoplasmic OS=Homo sapiens GN=GOT1 PE=1 SV=3	2	89.84	36409.9	40929.1	34871.5	37403.5
DSCAM_HUMAN	Down syndrome cell adhesion molecule OS=Homo sapiens GN=DSCAM PE=1 SV=2	1	34.36	55079.1	2303.19	54243.1	37208.5
TALDO_HUMAN	Transaldolase OS=Homo sapiens GN=TALDO1 PE=1 SV=2	4	140.6	30007.1	48222.7	32990.3	37073.4
PEPD_HUMAN	Xaa-Pro dipeptidase OS=Homo sapiens GN=PEPD PE=1 SV=3	6	250.08	34878	36928.6	37221.1	36342.6
NAMPT_HUMAN	Nicotinamide phosphoribosyltransferase OS=Homo sapiens GN=NAMPT PE=1 SV=1	3	125.31	32385.9	43860.6	32665	36303.8
SERC_HUMAN	Phosphoserine aminotransferase OS=Homo sapiens GN=PSAT1 PE=1 SV=2	5	216.63	35365.2	42109.6	31107.4	36194.1
MARCS_HUMAN	Myristoylated alanine-rich C-kinase substrate OS=Homo sapiens GN=MARCKS PE=1 SV=4	5	234.89	27937.8	41710.3	38854.1	36167.4
ATX2_HUMAN	Ataxin-2 OS=Homo sapiens GN=ATXN2 PE=1 SV=2	1	27.77	55907.1	47061.3	3936.42	35634.9
RAP1A_HUMAN	Ras-related protein Rap-1A OS=Homo sapiens GN=RAP1A PE=1 SV=1	3	96.48	35479.3	47420.9	23111	35337.1
AMD_HUMAN	Peptidyl-glycine alpha-amidating monooxygenase OS=Homo sapiens GN=PAM PE=1 SV=2	5	193.83	30218	39315.8	35609.4	35047.7
RAB1B_HUMAN	Ras-related protein Rab-1B OS=Homo sapiens GN=RAB1B PE=1 SV=1	3	137.73	38141.5	42436.8	23357.6	34645.3
VDAC2_HUMAN	Voltage-dependent anion-selective channel protein 2 OS=Homo sapiens GN=VDAC2 PE=1 SV=2	5	172.22	35588.1	41869.1	26077.7	34511.7
UD3A1_HUMAN	UDP-glucuronosyltransferase 3A1 OS=Homo sapiens GN=UGT3A1 PE=2 SV=1	1	26.81	28060	46280.9	28782.5	34374.5
CALX_HUMAN	Calnexin OS=Homo sapiens GN=CANX PE=1 SV=2	4	142.68	33253.2	37716.8	31975.1	34315
TPP1_HUMAN	Tripeptidyl-peptidase 1 OS=Homo sapiens GN=TPP1 PE=1 SV=2	4	241.85	33934.5	33451.6	35236.3	34207.5
DTNB_HUMAN	Dystrobrevin beta OS=Homo sapiens GN=DTNB PE=1 SV=1	1	20.65	51979.7	4748.48	45691.7	34139.9
SCRIB_HUMAN	Protein scribble homolog OS=Homo sapiens GN=SCRIB PE=1 SV=4	1	50.87	31312.5	34105.4	36627.3	34015.1
THIO_HUMAN	Thioredoxin OS=Homo sapiens GN=TXN PE=1 SV=3	4	113.21	31689.8	36718.9	33600.1	34002.9
RASD1_HUMAN	Dexamethasone-induced Ras-related protein 1 OS=Homo sapiens GN=RASD1 PE=1 SV=1	1	24.89	31178.2	41221.9	29302.4	33900.8
TAGL_HUMAN	Transgelin OS=Homo sapiens GN=TAGLN PE=1 SV=4	4	159.85	32479.5	43528.4	25541.5	33849.8
CD14_HUMAN	Monocyte differentiation antigen CD14 OS=Homo sapiens GN=CD14 PE=1 SV=2	5	181.66	44234.2	31432.6	25833	33833.3
IF5A1_HUMAN	Eukaryotic translation initiation factor 5A-1 OS=Homo sapiens GN=EIF5A PE=1 SV=2	2	78.18	59868.6	13470.5	27679.8	33673
PGFRL_HUMAN	Platelet-derived growth factor receptor-like protein OS=Homo sapiens GN=PDGFRL PE=1 SV=1	2	61.26	47218.4	18252.8	34568.1	33346.4
TAGL2_HUMAN	Transgelin-2 OS=Homo sapiens GN=TAGLN2 PE=1 SV=3	3	95.16	31724.6	41331	26892.4	33316
TCPD_HUMAN	T-complex protein 1 subunit delta OS=Homo sapiens GN=CCT4 PE=1 SV=4	4	111.75	28810.7	40473.9	30310.7	33198.4
SEPT2_HUMAN	Septin-2 OS=Homo sapiens GN=SEPT2 PE=1 SV=1	4	167.51	31774.8	29206.8	38367.4	33116.3
CO8B_HUMAN	Complement component C8 beta chain OS=Homo sapiens GN=C8B PE=1 SV=3	1	36.85	34744.1	35255.1	29265	33088
GLU2B_HUMAN	Glucosidase 2 subunit beta OS=Homo sapiens GN=PRKCSH PE=1 SV=2	2	97.18	34340.2	16082.9	44402	31608.4
SHPRH_HUMAN	E3 ubiquitin-protein ligase SHPRH OS=Homo sapiens GN=SHPRH PE=1 SV=2	1	52.73	24213.4	46265.7	24176.2	31551.8
CSF1_HUMAN	Macrophage colony-stimulating factor 1 OS=Homo sapiens GN=CSF1 PE=1 SV=2	1	28.11	29119.4	37448.3	27736	31434.6
EHD2_HUMAN	EH domain-containing protein 2 OS=Homo sapiens GN=EHD2 PE=1 SV=2	3	117.71	36317.9	21480	36251.6	31349.8
CBPQ_HUMAN	Carboxypeptidase Q OS=Homo sapiens GN=CPQ PE=1 SV=1	4	173.68	43424.5	27933.6	21752.6	31036.9
N42L2_HUMAN	NEDD4-binding protein 2-like 2 OS=Homo sapiens GN=N4BP2L2 PE=1 SV=1	1	32.99	30715.7	27374.8	34083.5	30724.7
RL23_HUMAN	60S ribosomal protein L23 OS=Homo sapiens GN=RPL23 PE=1 SV=1	1	21.22	39139	31812.3	20344.3	30431.9
KLH15_HUMAN	Kelch-like protein 15 OS=Homo sapiens GN=KLHL15 PE=1 SV=2	1	23.7	26802.3	43342.4	20851	30331.9
PTK7_HUMAN	Inactive tyrosine-protein kinase 7 OS=Homo sapiens GN=PTK7 PE=1 SV=2	3	106.59	25928.3	37819.9	27226.7	30325
ZC3H3_HUMAN	Zinc finger CCCH domain-containing protein 3 OS=Homo sapiens GN=ZC3H3 PE=1 SV=3	1	25.55	29990.7	30738.5	29262.2	29997.1
NPC2_HUMAN	Epididymal secretory protein E1 OS=Homo sapiens GN=NPC2 PE=1 SV=1	3	107.8	28499.6	35114.5	26263.1	29959.1
FERM1_HUMAN	Fermitin family homolog 1 OS=Homo sapiens GN=FERMT1 PE=1 SV=1	1	22.42	54635.5	4607.53	30577.3	29940.1
SERA_HUMAN	D-3-phosphoglycerate dehydrogenase OS=Homo sapiens GN=PHGDH PE=1 SV=4	5	237.24	30092.2	31341	28135.5	29856.2
CEMIP_HUMAN	Cell migration-inducing and hyaluronan-binding protein OS=Homo sapiens GN=CEMIP PE=1 SV=2	4	174.83	26990.5	31245.9	31104.1	29780.2
CD244_HUMAN	Natural killer cell receptor 2B4 OS=Homo sapiens GN=CD244 PE=1 SV=2	1	24.86	31538	35653.5	21849.6	29680.4
TCPB_HUMAN	T-complex protein 1 subunit beta OS=Homo sapiens GN=CCT2 PE=1 SV=4	2	135.27	43941.1	21386.6	23541.9	29623.2
1433E_HUMAN	14-3-3 protein epsilon OS=Homo sapiens GN=YWHAE PE=1 SV=1	3	212.41	29003.3	32076.1	27161.9	29413.8
CBR1_HUMAN	Carbonyl reductase [NADPH] 1 OS=Homo sapiens GN=CBR1 PE=1 SV=3	6	206.94	31219.9	27478.3	29367.7	29355.3
RENR_HUMAN	Renin receptor OS=Homo sapiens GN=ATP6AP2 PE=1 SV=2	4	137.33	27054	37809.6	21823.9	28895.8
RL18A_HUMAN	60S ribosomal protein L18a OS=Homo sapiens GN=RPL18A PE=1 SV=2	1	57.6	29916.8	21379.3	35146	28814
NP1L1_HUMAN	Nucleosome assembly protein 1-like 1 OS=Homo sapiens GN=NAP1L1 PE=1 SV=1	1	35.65	34432	32288.5	19712.9	28811.2
IBP6_HUMAN	Insulin-like growth factor-binding protein 6 OS=Homo sapiens GN=IGFBP6 PE=1 SV=1	1	23.59	27960.2	29976.7	26865.8	28267.6
CLH1_HUMAN	Clathrin heavy chain 1 OS=Homo sapiens GN=CLTC PE=1 SV=5	3	151.92	26937.7	33969.3	23333.9	28080.3
G6PD_HUMAN	Glucose-6-phosphate 1-dehydrogenase OS=Homo sapiens GN=G6PD PE=1 SV=4	2	118.84	33833.2	23265.8	26751	27950
VGFR1_HUMAN	Vascular endothelial growth factor receptor 1 OS=Homo sapiens GN=FLT1 PE=1 SV=2	1	28.49	34596.1	15034.8	33949.8	27860.2
PSA6_HUMAN	Proteasome subunit alpha type-6 OS=Homo sapiens GN=PSMA6 PE=1 SV=1	2	93.03	27489.8	34556.8	21074.4	27707
RD23B_HUMAN	UV excision repair protein RAD23 homolog B OS=Homo sapiens GN=RAD23B PE=1 SV=1	1	32.43	23409.9	42331.7	16798.8	27513.4
ASAH1_HUMAN	Acid ceramidase OS=Homo sapiens GN=ASAH1 PE=1 SV=5	3	115.3	26722.2	32379.8	23072.6	27391.5
CD248_HUMAN	Endosialin OS=Homo sapiens GN=CD248 PE=1 SV=1	3	69.55	28802.7	22829.8	30498.6	27377.1
DX39A_HUMAN	ATP-dependent RNA helicase DDX39A OS=Homo sapiens GN=DDX39A PE=1 SV=2	2	79.87	27444.5	26967.6	27065.6	27159.2
NTNG2_HUMAN	Netrin-G2 OS=Homo sapiens GN=NTNG2 PE=1 SV=2	1	24.98	27635.7	26881	25450.4	26655.7
GRID2_HUMAN	Glutamate receptor ionotropic, delta-2 OS=Homo sapiens GN=GRID2 PE=1 SV=2	1	24.31	25941.5	37862.6	16136.5	26646.9
NEGR1_HUMAN	Neuronal growth regulator 1 OS=Homo sapiens GN=NEGR1 PE=1 SV=3	2	75.62	23014.4	30772.9	25514.7	26434
H2A1B_HUMAN	Histone H2A type 1-B/E OS=Homo sapiens GN=HIST1H2AB PE=1 SV=2	2	53.7	24941	31046.7	22603.1	26196.9
VITRN_HUMAN	Vitrin OS=Homo sapiens GN=VIT PE=2 SV=1	2	77.8	27783.2	28639.4	21929.4	26117.3
TR19L_HUMAN	Tumor necrosis factor receptor superfamily member 19L OS=Homo sapiens GN=RELT PE=1 SV=1	1	22.7	24711.5	31301.8	22109	26040.8
PCBP2_HUMAN	Poly(rC)-binding protein 2 OS=Homo sapiens GN=PCBP2 PE=1 SV=1	1	78.78	25067.8	33949.5	18865.8	25961
SYDC_HUMAN	Aspartate--tRNA ligase, cytoplasmic OS=Homo sapiens GN=DARS PE=1 SV=2	3	158.56	23107	33508.5	20545.6	25720.4
RAB5C_HUMAN	Ras-related protein Rab-5C OS=Homo sapiens GN=RAB5C PE=1 SV=2	3	171.49	23911.2	29355.4	23805	25690.5
FUCO_HUMAN	Tissue alpha-L-fucosidase OS=Homo sapiens GN=FUCA1 PE=1 SV=4	1	78.46	37730.6	6495.54	32680.9	25635.7
PTGDS_HUMAN	Prostaglandin-H2 D-isomerase OS=Homo sapiens GN=PTGDS PE=1 SV=1	2	95.62	24969.7	25094	26421	25494.9
LTBP1_HUMAN	Latent-transforming growth factor beta-binding protein 1 OS=Homo sapiens GN=LTBP1 PE=1 SV=4	4	171.45	20660.9	27806.3	27521.8	25329.7
CD109_HUMAN	CD109 antigen OS=Homo sapiens GN=CD109 PE=1 SV=2	6	257.79	18334	30033.7	27467.7	25278.5
HNRPM_HUMAN	Heterogeneous nuclear ribonucleoprotein M OS=Homo sapiens GN=HNRNPM PE=1 SV=3	2	73.47	26494	28284	20792.6	25190.2
TBB2A_HUMAN	Tubulin beta-2A chain OS=Homo sapiens GN=TUBB2A PE=1 SV=1	1	463.87	28490.1	21761.6	25148.7	25133.5
MK_HUMAN	Midkine OS=Homo sapiens GN=MDK PE=1 SV=1	2	75.04	27860.6	20815.3	26392.2	25022.7
TFR1_HUMAN	Transferrin receptor protein 1 OS=Homo sapiens GN=TFRC PE=1 SV=2	7	252.98	23583.6	32334	18595.2	24837.6
TLN1_HUMAN	Talin-1 OS=Homo sapiens GN=TLN1 PE=1 SV=3	6	227.77	20499.6	27917.4	25130.9	24516
NUP50_HUMAN	Nuclear pore complex protein Nup50 OS=Homo sapiens GN=NUP50 PE=1 SV=2	1	25.44	16926.5	30095.7	24972.8	23998.4
MAP1B_HUMAN	Microtubule-associated protein 1B OS=Homo sapiens GN=MAP1B PE=1 SV=2	3	175.88	21693.3	29039.4	21177.1	23969.9
MVP_HUMAN	Major vault protein OS=Homo sapiens GN=MVP PE=1 SV=4	2	99.77	12056.9	37311.1	22030.8	23799.6
GLGB_HUMAN	1,4-alpha-glucan-branching enzyme OS=Homo sapiens GN=GBE1 PE=1 SV=3	4	134.7	23977.9	21385.7	25939	23767.5
PSB3_HUMAN	Proteasome subunit beta type-3 OS=Homo sapiens GN=PSMB3 PE=1 SV=2	2	74.38	24313.2	30797	15470.7	23526.9
H2B1A_HUMAN	Histone H2B type 1-A OS=Homo sapiens GN=HIST1H2BA PE=1 SV=3	1	52.59	25326.7	23804.5	21102.2	23411.1
LMAN2_HUMAN	Vesicular integral-membrane protein VIP36 OS=Homo sapiens GN=LMAN2 PE=1 SV=1	3	98.09	21807.8	30541.1	17560.4	23303.1
UGPA_HUMAN	UTP--glucose-1-phosphate uridylyltransferase OS=Homo sapiens GN=UGP2 PE=1 SV=5	2	105.5	16396.9	31396.6	21884.5	23226
TAF3_HUMAN	Transcription initiation factor TFIID subunit 3 OS=Homo sapiens GN=TAF3 PE=1 SV=1	1	23.58	29242.9	20949.4	19389.7	23194
AATM_HUMAN	Aspartate aminotransferase, mitochondrial OS=Homo sapiens GN=GOT2 PE=1 SV=3	5	217.71	23872.8	28060.4	17601	23178.1
ADCK1_HUMAN	Uncharacterized aarF domain-containing protein kinase 1 OS=Homo sapiens GN=ADCK1 PE=2 SV=2	1	23.2	24360.8	25448.5	19248.3	23019.2
CATF_HUMAN	Cathepsin F OS=Homo sapiens GN=CTSF PE=1 SV=1	3	128.64	20356.9	24187.3	24086.4	22876.9
IQGA1_HUMAN	Ras GTPase-activating-like protein IQGAP1 OS=Homo sapiens GN=IQGAP1 PE=1 SV=1	4	188.34	21107.3	25735.1	21133.6	22658.6
4F2_HUMAN	4F2 cell-surface antigen heavy chain OS=Homo sapiens GN=SLC3A2 PE=1 SV=3	5	212.45	27025.2	20073.1	20872	22656.8
CAV1_HUMAN	Caveolin-1 OS=Homo sapiens GN=CAV1 PE=1 SV=4	1	32.2	30264.2	26160.3	11533.2	22652.6
PCYOX_HUMAN	Prenylcysteine oxidase 1 OS=Homo sapiens GN=PCYOX1 PE=1 SV=3	2	67.87	22838.7	28822.7	15770.4	22477.3
AMPL_HUMAN	Cytosol aminopeptidase OS=Homo sapiens GN=LAP3 PE=1 SV=3	1	41.08	16352.2	26555.3	24330.7	22412.7
PRGC2_HUMAN	Peroxisome proliferator-activated receptor gamma coactivator 1-beta OS=Homo sapiens GN=PPARGC1B PE=1 SV=2	1	31.74	24647.3	11571.2	30892.7	22370.4
TXND5_HUMAN	Thioredoxin domain-containing protein 5 OS=Homo sapiens GN=TXNDC5 PE=1 SV=2	4	111.69	18952	17818.2	30261.7	22344
GRM2A_HUMAN	GRAM domain-containing protein 2A OS=Homo sapiens GN=GRAMD2A PE=1 SV=2	1	22.06	21120.9	33201.9	12363.7	22228.8
ROA3_HUMAN	Heterogeneous nuclear ribonucleoprotein A3 OS=Homo sapiens GN=HNRNPA3 PE=1 SV=2	3	117.07	21332.9	22081	22936.6	22116.8
FNDC1_HUMAN	Fibronectin type III domain-containing protein 1 OS=Homo sapiens GN=FNDC1 PE=2 SV=4	4	203.48	14179.1	32126.9	19274.9	21860.3
1433G_HUMAN	14-3-3 protein gamma OS=Homo sapiens GN=YWHAG PE=1 SV=2	2	159.59	20334.9	25347.9	19897.9	21860.2
OMD_HUMAN	Osteomodulin OS=Homo sapiens GN=OMD PE=1 SV=1	2	78.05	26084.2	12228.7	27236.2	21849.7
PCP_HUMAN	Lysosomal Pro-X carboxypeptidase OS=Homo sapiens GN=PRCP PE=1 SV=1	2	57.91	20439.7	26847.9	17889.1	21725.6
H3C_HUMAN	Histone H3.3C OS=Homo sapiens GN=H3F3C PE=1 SV=3	1	42.69	23669.8	24814.8	16596.2	21693.6
PSB5_HUMAN	Proteasome subunit beta type-5 OS=Homo sapiens GN=PSMB5 PE=1 SV=3	2	58.8	24600.9	22512.1	17864.1	21659.1
TLN2_HUMAN	Talin-2 OS=Homo sapiens GN=TLN2 PE=1 SV=4	1	56.78	30430	9802.81	24502.8	21578.5
CO4A_HUMAN	Complement C4-A OS=Homo sapiens GN=C4A PE=1 SV=2	4	150.06	24374.1	24807.8	15390.5	21524.1
ZFR2_HUMAN	Zinc finger RNA-binding protein 2 OS=Homo sapiens GN=ZFR2 PE=2 SV=3	1	24.21	20076.7	21552.7	22423.2	21350.9
NOG1_HUMAN	Nucleolar GTP-binding protein 1 OS=Homo sapiens GN=GTPBP4 PE=1 SV=3	1	26.86	22082.1	26576.8	15391.5	21350.2
EHD1_HUMAN	EH domain-containing protein 1 OS=Homo sapiens GN=EHD1 PE=1 SV=2	1	33.63	21451.3	28740.4	13822.7	21338.1
LARP1_HUMAN	La-related protein 1 OS=Homo sapiens GN=LARP1 PE=1 SV=2	1	27.26	26454.8	12468.3	25029.7	21317.6
LYAG_HUMAN	Lysosomal alpha-glucosidase OS=Homo sapiens GN=GAA PE=1 SV=4	2	111.63	23628.5	20905.8	19070.2	21201.5
NIBL1_HUMAN	Niban-like protein 1 OS=Homo sapiens GN=FAM129B PE=1 SV=3	3	117.96	21880	21479.5	20128.1	21162.5
RS3A_HUMAN	40S ribosomal protein S3a OS=Homo sapiens GN=RPS3A PE=1 SV=2	3	103.04	24693.4	19408.2	18805.9	20969.2
SFRP2_HUMAN	Secreted frizzled-related protein 2 OS=Homo sapiens GN=SFRP2 PE=1 SV=2	2	55.8	20081.6	26898.2	15729.6	20903.1
SAHH_HUMAN	Adenosylhomocysteinase OS=Homo sapiens GN=AHCY PE=1 SV=4	3	91.59	22311.1	20228.4	19903.9	20814.4
MAMC2_HUMAN	MAM domain-containing protein 2 OS=Homo sapiens GN=MAMDC2 PE=2 SV=3	8	318.63	19196.6	25597.5	17358.6	20717.6
TRPM5_HUMAN	Transient receptor potential cation channel subfamily M member 5 OS=Homo sapiens GN=TRPM5 PE=2 SV=1	1	24.29	24192.8	16372.1	21071	20545.3
PSMD2_HUMAN	26S proteasome non-ATPase regulatory subunit 2 OS=Homo sapiens GN=PSMD2 PE=1 SV=3	3	159.6	19724.9	20678.8	21020.7	20474.8
APAF_HUMAN	Apoptotic protease-activating factor 1 OS=Homo sapiens GN=APAF1 PE=1 SV=2	1	23.44	24616.5	15564.2	20903.5	20361.4
A4_HUMAN	Amyloid-beta A4 protein OS=Homo sapiens GN=APP PE=1 SV=3	3	134.8	20111.8	19618.5	21298.8	20343.1
ALDOC_HUMAN	Fructose-bisphosphate aldolase C OS=Homo sapiens GN=ALDOC PE=1 SV=2	1	61.89	24507.4	31031.6	4982.89	20174
COGA1_HUMAN	Collagen alpha-1(XVI) chain OS=Homo sapiens GN=COL16A1 PE=1 SV=2	3	87.57	18152	22897.3	19062.4	20037.2
DPP2_HUMAN	Dipeptidyl peptidase 2 OS=Homo sapiens GN=DPP7 PE=1 SV=3	6	234.1	17824.7	23026.7	18540.5	19797.3
APOE_HUMAN	Apolipoprotein E OS=Homo sapiens GN=APOE PE=1 SV=1	1	31.08	18510.3	18950.5	21825.1	19762
RUVB1_HUMAN	RuvB-like 1 OS=Homo sapiens GN=RUVBL1 PE=1 SV=1	4	129.66	14538.4	27951.9	16777	19755.7
CCBE1_HUMAN	Collagen and calcium-binding EGF domain-containing protein 1 OS=Homo sapiens GN=CCBE1 PE=1 SV=1	2	89.34	19964.2	22044.3	16688.8	19565.8
SYWC_HUMAN	Tryptophan--tRNA ligase, cytoplasmic OS=Homo sapiens GN=WARS PE=1 SV=2	5	227.2	20881.1	18334.2	19092.4	19435.9
H15_HUMAN	Histone H1.5 OS=Homo sapiens GN=HIST1H1B PE=1 SV=3	2	68.53	21463.7	21712.4	15046.5	19407.5
SET_HUMAN	Protein SET OS=Homo sapiens GN=SET PE=1 SV=3	2	114.46	15421.6	19351.5	22747.5	19173.5
IDHC_HUMAN	Isocitrate dehydrogenase [NADP] cytoplasmic OS=Homo sapiens GN=IDH1 PE=1 SV=2	3	102.43	18821.6	19110.2	19510.2	19147.4
ARF4_HUMAN	ADP-ribosylation factor 4 OS=Homo sapiens GN=ARF4 PE=1 SV=3	2	101.29	22871.1	20366.7	14134.5	19124.1
HNRPQ_HUMAN	Heterogeneous nuclear ribonucleoprotein Q OS=Homo sapiens GN=SYNCRIP PE=1 SV=2	2	136.76	17211.4	22097.9	17924.1	19077.8
ECHA_HUMAN	Trifunctional enzyme subunit alpha, mitochondrial OS=Homo sapiens GN=HADHA PE=1 SV=2	5	158.9	16318.8	22928.5	17533.1	18926.8
PSB1_HUMAN	Proteasome subunit beta type-1 OS=Homo sapiens GN=PSMB1 PE=1 SV=2	2	78.41	22469.1	22442.7	11809.8	18907.2
P5CS_HUMAN	Delta-1-pyrroline-5-carboxylate synthase OS=Homo sapiens GN=ALDH18A1 PE=1 SV=2	1	31.25	19551.8	18911.3	18230.5	18897.9
NSD1_HUMAN	Histone-lysine N-methyltransferase, H3 lysine-36 and H4 lysine-20 specific OS=Homo sapiens GN=NSD1 PE=1 SV=1	1	20.79	8694.36	10552.7	36932	18726.3
GBB1_HUMAN	Guanine nucleotide-binding protein G(I)/G(S)/G(T) subunit beta-1 OS=Homo sapiens GN=GNB1 PE=1 SV=3	1	86.78	24069.6	18732.2	13170.4	18657.4
ANGP1_HUMAN	Angiopoietin-1 OS=Homo sapiens GN=ANGPT1 PE=1 SV=2	3	125.99	18961.1	13892.4	22673.7	18509.1
SFRP1_HUMAN	Secreted frizzled-related protein 1 OS=Homo sapiens GN=SFRP1 PE=1 SV=1	3	85	15042.7	17091.5	22564.9	18233
CAB45_HUMAN	45 kDa calcium-binding protein OS=Homo sapiens GN=SDF4 PE=1 SV=1	2	109.06	11905.9	24941.9	17785.2	18211
RHG01_HUMAN	Rho GTPase-activating protein 1 OS=Homo sapiens GN=ARHGAP1 PE=1 SV=1	2	75.51	18431.5	19481.4	16569.7	18160.9
SC31A_HUMAN	Protein transport protein Sec31A OS=Homo sapiens GN=SEC31A PE=1 SV=3	1	47.58	20387.3	19340.4	14506	18077.9
FREM3_HUMAN	FRAS1-related extracellular matrix protein 3 OS=Homo sapiens GN=FREM3 PE=3 SV=2	1	32.48	17761.1	17904.1	17728.7	17798
RL5_HUMAN	60S ribosomal protein L5 OS=Homo sapiens GN=RPL5 PE=1 SV=3	1	50.15	20877.9	17453.2	14439.9	17590.3
CO2_HUMAN	Complement C2 OS=Homo sapiens GN=C2 PE=1 SV=2	3	92.08	21384.8	17469.3	12833.1	17229.1
HNRPD_HUMAN	Heterogeneous nuclear ribonucleoprotein D0 OS=Homo sapiens GN=HNRNPD PE=1 SV=1	3	189.66	13443.5	22436.4	15693.4	17191.1
ERP44_HUMAN	Endoplasmic reticulum resident protein 44 OS=Homo sapiens GN=ERP44 PE=1 SV=1	3	136.62	17761.3	21319.5	12477.9	17186.2
RS9_HUMAN	40S ribosomal protein S9 OS=Homo sapiens GN=RPS9 PE=1 SV=3	6	197.8	20115.3	19000.8	12374.7	17163.6
VDAC1_HUMAN	Voltage-dependent anion-selective channel protein 1 OS=Homo sapiens GN=VDAC1 PE=1 SV=2	4	136.04	14134	24290.4	13044	17156.2
RL8_HUMAN	60S ribosomal protein L8 OS=Homo sapiens GN=RPL8 PE=1 SV=2	1	32.15	20167.5	16397.3	14627.6	17064.1
NDKB_HUMAN	Nucleoside diphosphate kinase B OS=Homo sapiens GN=NME2 PE=1 SV=1	1	54.19	22476.7	9482.84	19186.7	17048.7
H4_HUMAN	Histone H4 OS=Homo sapiens GN=HIST1H4A PE=1 SV=2	2	60.48	21225.3	14591.1	15139.6	16985.3
BTD_HUMAN	Biotinidase OS=Homo sapiens GN=BTD PE=1 SV=2	2	99.61	16809.2	17510.1	16280.8	16866.7
MFAP2_HUMAN	Microfibrillar-associated protein 2 OS=Homo sapiens GN=MFAP2 PE=2 SV=1	2	45.46	16668.5	18383.1	14936.4	16662.7
F10A1_HUMAN	Hsc70-interacting protein OS=Homo sapiens GN=ST13 PE=1 SV=2	2	64.61	16614.8	18721.6	14649.1	16661.8
SRCRM_HUMAN	Scavenger receptor cysteine-rich domain-containing protein SCART1 OS=Homo sapiens PE=1 SV=2	1	22.87	21311.5	8400.66	18973.4	16228.5
RL11_HUMAN	60S ribosomal protein L11 OS=Homo sapiens GN=RPL11 PE=1 SV=2	1	51.73	18313.9	16688.7	13584.7	16195.8
COPD_HUMAN	Coatomer subunit delta OS=Homo sapiens GN=ARCN1 PE=1 SV=1	2	96.37	14420.6	16273.7	17778.9	16157.8
RS14_HUMAN	40S ribosomal protein S14 OS=Homo sapiens GN=RPS14 PE=1 SV=3	1	47.08	19265	19386.2	9764.4	16138.5
UBP24_HUMAN	Ubiquitin carboxyl-terminal hydrolase 24 OS=Homo sapiens GN=USP24 PE=1 SV=3	1	20.04	15190.1	17070.1	16094	16118.1
FRPD3_HUMAN	FERM and PDZ domain-containing protein 3 OS=Homo sapiens GN=FRMPD3 PE=2 SV=2	1	26.93	14394.9	11443.5	22416.8	16085.1
DEST_HUMAN	Destrin OS=Homo sapiens GN=DSTN PE=1 SV=3	1	43.39	18509	15965.9	13770.6	16081.8
DDR1_HUMAN	Epithelial discoidin domain-containing receptor 1 OS=Homo sapiens GN=DDR1 PE=1 SV=1	1	44.78	18645.7	14141.9	15421.6	16069.7
ZN638_HUMAN	Zinc finger protein 638 OS=Homo sapiens GN=ZNF638 PE=1 SV=2	1	45.07	15720.7	17415.4	15064.3	16066.8
IGG1_HUMAN	Immunoglobulin gamma-1 heavy chain OS=Homo sapiens PE=1 SV=1	1	24.18	21133.8	15582.9	11058.1	15925
YD022_HUMAN	Putative uncharacterized protein FLJ45721 OS=Homo sapiens PE=5 SV=2	1	28.86	16043	19344.3	12195.7	15861
RS2_HUMAN	40S ribosomal protein S2 OS=Homo sapiens GN=RPS2 PE=1 SV=2	3	101.82	15839.8	15333	15797.4	15656.7
KALRN_HUMAN	Kalirin OS=Homo sapiens GN=KALRN PE=1 SV=2	1	23.31	13903.6	21634.8	11308.4	15615.6
H12_HUMAN	Histone H1.2 OS=Homo sapiens GN=HIST1H1C PE=1 SV=2	2	81.09	19152.3	16538.4	10997.1	15562.6
STON2_HUMAN	Stonin-2 OS=Homo sapiens GN=STON2 PE=1 SV=1	1	59.43	15848.1	17490.2	13226.5	15521.6
CDC42_HUMAN	Cell division control protein 42 homolog OS=Homo sapiens GN=CDC42 PE=1 SV=2	2	76.91	20687.5	13650.4	12066.9	15468.2
TENX_HUMAN	Tenascin-X OS=Homo sapiens GN=TNXB PE=1 SV=4	2	55.07	14875.1	16539.7	14693.5	15369.4
EF1D_HUMAN	Elongation factor 1-delta OS=Homo sapiens GN=EEF1D PE=1 SV=5	3	126.56	19957.7	10532.3	15489.5	15326.5
SEP11_HUMAN	Septin-11 OS=Homo sapiens GN=SEPT11 PE=1 SV=3	1	59.87	13163.1	18776.8	13906.5	15282.1
DHE3_HUMAN	Glutamate dehydrogenase 1, mitochondrial OS=Homo sapiens GN=GLUD1 PE=1 SV=2	1	24.12	14794.5	18429.9	12114	15112.8
DCD_HUMAN	Dermcidin OS=Homo sapiens GN=DCD PE=1 SV=2	1	29.29	17132.6	10449.3	17709.4	15097.1
PTN23_HUMAN	Tyrosine-protein phosphatase non-receptor type 23 OS=Homo sapiens GN=PTPN23 PE=1 SV=1	1	38.44	15428.9	19429.7	10369.7	15076.1
CISY_HUMAN	Citrate synthase, mitochondrial OS=Homo sapiens GN=CS PE=1 SV=2	3	106.04	16393.1	15863	12837	15031.1
TGM2_HUMAN	Protein-glutamine gamma-glutamyltransferase 2 OS=Homo sapiens GN=TGM2 PE=1 SV=2	4	156.99	12096.5	18242.9	14505.8	14948.4
PSG5_HUMAN	Pregnancy-specific beta-1-glycoprotein 5 OS=Homo sapiens GN=PSG5 PE=1 SV=3	1	222.87	16520.1	15754.9	12404.6	14893.2
SIK1_HUMAN	Serine/threonine-protein kinase SIK1 OS=Homo sapiens GN=SIK1 PE=1 SV=2	1	21.47	18937.6	3786.52	21311.7	14678.6
ARP2_HUMAN	Actin-related protein 2 OS=Homo sapiens GN=ACTR2 PE=1 SV=1	2	81.46	15110.1	15692.9	12491.5	14431.5
SFPQ_HUMAN	Splicing factor, proline- and glutamine-rich OS=Homo sapiens GN=SFPQ PE=1 SV=2	2	110.7	14395.3	16948.4	11918.4	14420.7
COFA1_HUMAN	Collagen alpha-1(XV) chain OS=Homo sapiens GN=COL15A1 PE=1 SV=2	4	164.7	14548.7	13935.9	14507.2	14330.6
ESPL1_HUMAN	Separin OS=Homo sapiens GN=ESPL1 PE=1 SV=3	1	23.44	11115.6	17243.1	14428.6	14262.4
OST48_HUMAN	Dolichyl-diphosphooligosaccharide--protein glycosyltransferase 48 kDa subunit OS=Homo sapiens GN=DDOST PE=1 SV=4	2	110.9	16472.9	13473.6	12804.7	14250.4
GSHR_HUMAN	Glutathione reductase, mitochondrial OS=Homo sapiens GN=GSR PE=1 SV=2	2	60.41	11967	19193.9	11371.7	14177.5
WTIP_HUMAN	Wilms tumor protein 1-interacting protein OS=Homo sapiens GN=WTIP PE=1 SV=3	1	22.65	21749.2	268.755	20074.9	14031
AP1B1_HUMAN	AP-1 complex subunit beta-1 OS=Homo sapiens GN=AP1B1 PE=1 SV=2	1	61.71	12995.6	12810.7	15828.4	13878.2
RL17_HUMAN	60S ribosomal protein L17 OS=Homo sapiens GN=RPL17 PE=1 SV=3	1	25.12	15714.4	16563.2	9311.49	13863
RCN1_HUMAN	Reticulocalbin-1 OS=Homo sapiens GN=RCN1 PE=1 SV=1	2	106.49	11735.1	14872.6	14956	13854.6
BGAL_HUMAN	Beta-galactosidase OS=Homo sapiens GN=GLB1 PE=1 SV=2	2	89.01	13227	15900.7	12429.8	13852.5
LAMA5_HUMAN	Laminin subunit alpha-5 OS=Homo sapiens GN=LAMA5 PE=1 SV=8	1	75.21	15448.8	13280.8	12822.8	13850.8
PKCB1_HUMAN	Protein kinase C-binding protein 1 OS=Homo sapiens GN=ZMYND8 PE=1 SV=2	1	20.74	15166.6	11926.8	14293	13795.5
COMP_HUMAN	Cartilage oligomeric matrix protein OS=Homo sapiens GN=COMP PE=1 SV=2	2	85.68	9873.04	20594.9	10527.9	13665.3
IGL1_HUMAN	Immunoglobulin lambda-1 light chain OS=Homo sapiens PE=1 SV=1	1	22.69	11948.3	19024.3	9885.41	13619.4
ARPC2_HUMAN	Actin-related protein 2/3 complex subunit 2 OS=Homo sapiens GN=ARPC2 PE=1 SV=1	2	64.18	13152.7	15911.8	11779	13614.5
AMPB_HUMAN	Aminopeptidase B OS=Homo sapiens GN=RNPEP PE=1 SV=2	1	26.08	13344.3	12342.1	15135.2	13607.2
SCRB2_HUMAN	Lysosome membrane protein 2 OS=Homo sapiens GN=SCARB2 PE=1 SV=2	1	37.89	13046.3	10936.2	16776.7	13586.4
FUBP1_HUMAN	Far upstream element-binding protein 1 OS=Homo sapiens GN=FUBP1 PE=1 SV=3	2	94.04	11324.5	16349.9	12906.4	13526.9
FUBP2_HUMAN	Far upstream element-binding protein 2 OS=Homo sapiens GN=KHSRP PE=1 SV=4	3	129.28	15931.8	13498.7	11017.9	13482.8
ENOG_HUMAN	Gamma-enolase OS=Homo sapiens GN=ENO2 PE=1 SV=3	1	117.17	13181.6	19268.4	7966.19	13472.1
LNX1_HUMAN	E3 ubiquitin-protein ligase LNX OS=Homo sapiens GN=LNX1 PE=1 SV=1	1	20.71	14107.9	8875.14	17236.1	13406.4
ADCL2_HUMAN	Arylacetamide deacetylase-like 2 OS=Homo sapiens GN=AADACL2 PE=2 SV=3	1	21.65	14103.5	12868	12266.7	13079.4
RL14_HUMAN	60S ribosomal protein L14 OS=Homo sapiens GN=RPL14 PE=1 SV=4	1	70.12	19531.7	10718	8940.98	13063.6
SPAG7_HUMAN	Sperm-associated antigen 7 OS=Homo sapiens GN=SPAG7 PE=1 SV=2	1	28.9	20284.6	6051.79	12854.2	13063.5
DDX3X_HUMAN	ATP-dependent RNA helicase DDX3X OS=Homo sapiens GN=DDX3X PE=1 SV=3	2	98.96	13413.8	11997.5	13754.4	13055.2
TGFB2_HUMAN	Transforming growth factor beta-2 OS=Homo sapiens GN=TGFB2 PE=1 SV=1	5	199.97	12899.5	14274.3	11858	13010.6
C1QT1_HUMAN	Complement C1q tumor necrosis factor-related protein 1 OS=Homo sapiens GN=C1QTNF1 PE=1 SV=1	1	73.46	12243.2	12818	13967.5	13009.5
IL6_HUMAN	Interleukin-6 OS=Homo sapiens GN=IL6 PE=1 SV=1	3	212.13	13904.2	12570.8	12314.3	12929.8
EMD_HUMAN	Emerin OS=Homo sapiens GN=EMD PE=1 SV=1	2	52.93	12914.5	14104.1	11632.3	12883.6
ANTR1_HUMAN	Anthrax toxin receptor 1 OS=Homo sapiens GN=ANTXR1 PE=1 SV=2	1	33.83	15703.4	11188.2	11533.4	12808.3
PTGR1_HUMAN	Prostaglandin reductase 1 OS=Homo sapiens GN=PTGR1 PE=1 SV=2	2	67.3	11001.7	14533.2	12424.1	12653
GDIA_HUMAN	Rab GDP dissociation inhibitor alpha OS=Homo sapiens GN=GDI1 PE=1 SV=2	1	178.8	12226.2	16384.1	9292.29	12634.2
NUCKS_HUMAN	Nuclear ubiquitous casein and cyclin-dependent kinase substrate 1 OS=Homo sapiens GN=NUCKS1 PE=1 SV=1	1	54.89	11104.7	15451.6	10920.2	12492.2
MX1_HUMAN	Interferon-induced GTP-binding protein Mx1 OS=Homo sapiens GN=MX1 PE=1 SV=4	3	103.39	12263.2	17886.8	7109.69	12419.9
NET1_HUMAN	Netrin-1 OS=Homo sapiens GN=NTN1 PE=1 SV=2	4	156.61	12049.3	15547.8	9507.2	12368.1
HS71A_HUMAN	Heat shock 70 kDa protein 1A OS=Homo sapiens GN=HSPA1A PE=1 SV=1	3	609.04	8763.92	16257.5	11895.2	12305.6
CAD11_HUMAN	Cadherin-11 OS=Homo sapiens GN=CDH11 PE=2 SV=2	2	71.65	11512.5	15080.6	10284.2	12292.4
MY18B_HUMAN	Unconventional myosin-XVIIIb OS=Homo sapiens GN=MYO18B PE=1 SV=1	1	21.95	15709.1	8527.38	12541	12259.2
1433F_HUMAN	14-3-3 protein eta OS=Homo sapiens GN=YWHAH PE=1 SV=4	2	145.9	11360.9	13828.9	11082.6	12090.8
RL13_HUMAN	60S ribosomal protein L13 OS=Homo sapiens GN=RPL13 PE=1 SV=4	2	66.27	16650.5	12060	7518.92	12076.5
PRDX5_HUMAN	Peroxiredoxin-5, mitochondrial OS=Homo sapiens GN=PRDX5 PE=1 SV=4	2	61.34	16555.4	11598.6	7766.35	11973.4
MYDGF_HUMAN	Myeloid-derived growth factor OS=Homo sapiens GN=MYDGF PE=1 SV=1	1	22.65	11900.3	13128.5	10682.6	11903.8
RL7_HUMAN	60S ribosomal protein L7 OS=Homo sapiens GN=RPL7 PE=1 SV=1	1	66.15	14299.2	12735.5	8602.26	11879
LMAN1_HUMAN	Protein ERGIC-53 OS=Homo sapiens GN=LMAN1 PE=1 SV=2	1	47.8	12725	12760	9987.74	11824.3
PCDA9_HUMAN	Protocadherin alpha-9 OS=Homo sapiens GN=PCDHA9 PE=2 SV=1	1	24.15	5223.27	18894	11194.2	11770.5
AP2M1_HUMAN	AP-2 complex subunit mu OS=Homo sapiens GN=AP2M1 PE=1 SV=2	3	93.87	13685.9	9768.02	11687.3	11713.7
ADT1_HUMAN	ADP/ATP translocase 1 OS=Homo sapiens GN=SLC25A4 PE=1 SV=4	2	62	11450.9	12354.6	11074.2	11626.5
COL12_HUMAN	Collectin-12 OS=Homo sapiens GN=COLEC12 PE=1 SV=3	2	74.03	12099.1	8910.2	13827.4	11612.3
ECHB_HUMAN	Trifunctional enzyme subunit beta, mitochondrial OS=Homo sapiens GN=HADHB PE=1 SV=3	3	84.28	11371.5	14159.6	9296.77	11609.3
LAMP1_HUMAN	Lysosome-associated membrane glycoprotein 1 OS=Homo sapiens GN=LAMP1 PE=1 SV=3	3	125.07	22397.4	4960.29	7081.46	11479.7
PKP2_HUMAN	Plakophilin-2 OS=Homo sapiens GN=PKP2 PE=1 SV=2	1	30.61	10532.3	16782.7	6954.95	11423.3
CNN2_HUMAN	Calponin-2 OS=Homo sapiens GN=CNN2 PE=1 SV=4	1	68.58	11447.5	6745.39	16051.1	11414.7
ATS1_HUMAN	A disintegrin and metalloproteinase with thrombospondin motifs 1 OS=Homo sapiens GN=ADAMTS1 PE=1 SV=4	1	66.13	12800.2	10166.3	11260.4	11409
ADA10_HUMAN	Disintegrin and metalloproteinase domain-containing protein 10 OS=Homo sapiens GN=ADAM10 PE=1 SV=1	3	116.01	11710.8	11392.8	11079.3	11394.3
UBP5_HUMAN	Ubiquitin carboxyl-terminal hydrolase 5 OS=Homo sapiens GN=USP5 PE=1 SV=2	2	66.55	11227	13824	8659.9	11236.9
GCSP_HUMAN	Glycine dehydrogenase (decarboxylating), mitochondrial OS=Homo sapiens GN=GLDC PE=1 SV=2	1	22.17	12013.9	12353.1	9139.54	11168.9
SRSF3_HUMAN	Serine/arginine-rich splicing factor 3 OS=Homo sapiens GN=SRSF3 PE=1 SV=1	1	44.22	14313.4	10283.5	8774.32	11123.7
COR1B_HUMAN	Coronin-1B OS=Homo sapiens GN=CORO1B PE=1 SV=1	4	123.28	11983.2	11018.7	10317	11106.3
CDAC1_HUMAN	Cytidine and dCMP deaminase domain-containing protein 1 OS=Homo sapiens GN=CDADC1 PE=2 SV=1	1	21.84	18818.6	6121.61	8153.7	11031.3
PZP_HUMAN	Pregnancy zone protein OS=Homo sapiens GN=PZP PE=1 SV=4	1	79.05	17956.4	5668.8	9348.7	10991.3
RBM10_HUMAN	RNA-binding protein 10 OS=Homo sapiens GN=RBM10 PE=1 SV=3	1	21.53	15856.8	15438.1	1552.27	10949.1
PSA3_HUMAN	Proteasome subunit alpha type-3 OS=Homo sapiens GN=PSMA3 PE=1 SV=2	3	103.08	10067.2	11212.4	11542.3	10940.6
SRC8_HUMAN	Src substrate cortactin OS=Homo sapiens GN=CTTN PE=1 SV=2	1	24.42	9724.9	13486.8	9162.35	10791.4
CSRP1_HUMAN	Cysteine and glycine-rich protein 1 OS=Homo sapiens GN=CSRP1 PE=1 SV=3	1	33.92	9619.43	15619.9	6872.49	10703.9
THIL_HUMAN	Acetyl-CoA acetyltransferase, mitochondrial OS=Homo sapiens GN=ACAT1 PE=1 SV=1	1	58.06	14005.6	7552.71	10544	10700.8
OLFL1_HUMAN	Olfactomedin-like protein 1 OS=Homo sapiens GN=OLFML1 PE=1 SV=2	1	72.39	11845.8	9591.46	10614.5	10683.9
B4GA1_HUMAN	Beta-1,4-glucuronyltransferase 1 OS=Homo sapiens GN=B4GAT1 PE=1 SV=1	2	59.15	9333.83	12156.2	10290.7	10593.6
PDGFD_HUMAN	Platelet-derived growth factor D OS=Homo sapiens GN=PDGFD PE=1 SV=1	2	125.39	10619.8	12224.5	8920.22	10588.2
RL27A_HUMAN	60S ribosomal protein L27a OS=Homo sapiens GN=RPL27A PE=1 SV=2	1	38.23	11542	12467.7	7570.67	10526.8
TCPZ_HUMAN	T-complex protein 1 subunit zeta OS=Homo sapiens GN=CCT6A PE=1 SV=3	1	28.37	8945.62	13540.9	9057.97	10514.8
ZNF26_HUMAN	Zinc finger protein 26 OS=Homo sapiens GN=ZNF26 PE=1 SV=3	1	32.24	9889.94	12087.1	9412.01	10463
FLRT2_HUMAN	Leucine-rich repeat transmembrane protein FLRT2 OS=Homo sapiens GN=FLRT2 PE=1 SV=1	3	116.86	9587.22	11033.5	10664.1	10428.3
RAB14_HUMAN	Ras-related protein Rab-14 OS=Homo sapiens GN=RAB14 PE=1 SV=4	2	78.64	10885.8	8117.15	12073.3	10358.7
GBB2_HUMAN	Guanine nucleotide-binding protein G(I)/G(S)/G(T) subunit beta-2 OS=Homo sapiens GN=GNB2 PE=1 SV=3	1	94.42	10631.2	13851.3	6367.71	10283.4
CFAH_HUMAN	Complement factor H OS=Homo sapiens GN=CFH PE=1 SV=4	2	87.25	15351.1	8151.14	7339.56	10280.6
AK1C1_HUMAN	Aldo-keto reductase family 1 member C1 OS=Homo sapiens GN=AKR1C1 PE=1 SV=1	2	68.35	12919.6	8441.81	9420.84	10260.7
SEC13_HUMAN	Protein SEC13 homolog OS=Homo sapiens GN=SEC13 PE=1 SV=3	1	47.92	11621.6	10448.3	8580.36	10216.7
CCD40_HUMAN	Coiled-coil domain-containing protein 40 OS=Homo sapiens GN=CCDC40 PE=2 SV=2	1	23.77	9588.97	11627.7	9225.37	10147.4
RHOA_HUMAN	Transforming protein RhoA OS=Homo sapiens GN=RHOA PE=1 SV=1	2	57.97	11602.3	12818.4	5930.07	10116.9
SPHM_HUMAN	N-sulphoglucosamine sulphohydrolase OS=Homo sapiens GN=SGSH PE=1 SV=1	2	111.76	12594.1	8219	9270.77	10028
RS6_HUMAN	40S ribosomal protein S6 OS=Homo sapiens GN=RPS6 PE=1 SV=1	2	69.6	10626	12104.4	7192.11	9974.19
SIAT6_HUMAN	CMP-N-acetylneuraminate-beta-1,4-galactoside alpha-2,3-sialyltransferase OS=Homo sapiens GN=ST3GAL3 PE=1 SV=1	1	22.76	11806.9	7989.71	10032.7	9943.11
DDX17_HUMAN	Probable ATP-dependent RNA helicase DDX17 OS=Homo sapiens GN=DDX17 PE=1 SV=2	2	70.75	11891.1	11619.7	6251.41	9920.73
ANAG_HUMAN	Alpha-N-acetylglucosaminidase OS=Homo sapiens GN=NAGLU PE=1 SV=2	2	87	11221.3	11002.2	7399.36	9874.28
S4A5_HUMAN	Electrogenic sodium bicarbonate cotransporter 4 OS=Homo sapiens GN=SLC4A5 PE=2 SV=2	1	26.57	11827.5	12871	4866.28	9854.94
QOR_HUMAN	Quinone oxidoreductase OS=Homo sapiens GN=CRYZ PE=1 SV=1	1	28.48	9569.71	12007.5	7876.06	9817.75
GPNMB_HUMAN	Transmembrane glycoprotein NMB OS=Homo sapiens GN=GPNMB PE=1 SV=2	2	100.07	9069.86	13224.3	7113.61	9802.59
COPG1_HUMAN	Coatomer subunit gamma-1 OS=Homo sapiens GN=COPG1 PE=1 SV=1	3	175.08	8030.47	10321.8	11034.7	9795.64
CPNE3_HUMAN	Copine-3 OS=Homo sapiens GN=CPNE3 PE=1 SV=1	2	70.08	9150.59	10584.4	9639.64	9791.53
ASCC3_HUMAN	Activating signal cointegrator 1 complex subunit 3 OS=Homo sapiens GN=ASCC3 PE=1 SV=3	1	21.3	5733.09	15811.8	7795.03	9779.98
UB2V1_HUMAN	Ubiquitin-conjugating enzyme E2 variant 1 OS=Homo sapiens GN=UBE2V1 PE=1 SV=2	1	21.15	10986.1	11511.8	6716.21	9738.06
CALM1_HUMAN	Calmodulin-1 OS=Homo sapiens GN=CALM1 PE=1 SV=1	2	53.3	10038.2	8089.99	11071.8	9733.32
DJB11_HUMAN	DnaJ homolog subfamily B member 11 OS=Homo sapiens GN=DNAJB11 PE=1 SV=1	3	93.92	11018.6	9255.84	8645.3	9639.93
GRM1C_HUMAN	GRAM domain-containing protein 1C OS=Homo sapiens GN=GRAMD1C PE=1 SV=2	1	20.84	12019.6	879.857	15986.1	9628.52
UBP14_HUMAN	Ubiquitin carboxyl-terminal hydrolase 14 OS=Homo sapiens GN=USP14 PE=1 SV=3	1	37.74	9846.48	10410.5	8617.66	9624.88
AMPN_HUMAN	Aminopeptidase N OS=Homo sapiens GN=ANPEP PE=1 SV=4	2	90.13	7625.98	12557.5	8653.94	9612.47
CNPD1_HUMAN	Protein CNPPD1 OS=Homo sapiens GN=CNPPD1 PE=2 SV=2	1	21.39	5751.92	9932.36	13091.4	9591.9
RCN3_HUMAN	Reticulocalbin-3 OS=Homo sapiens GN=RCN3 PE=1 SV=1	1	75.58	9541.52	9145.81	10056.7	9581.35
MAEL_HUMAN	Protein maelstrom homolog OS=Homo sapiens GN=MAEL PE=1 SV=1	1	28.25	7520.7	16600.1	4327.2	9482.65
HINT1_HUMAN	Histidine triad nucleotide-binding protein 1 OS=Homo sapiens GN=HINT1 PE=1 SV=2	1	25.73	12031.2	3321.31	13082.5	9478.35
ANO1_HUMAN	Anoctamin-1 OS=Homo sapiens GN=ANO1 PE=1 SV=1	1	20	8744.42	12317.9	7007.4	9356.59
XAGE1_HUMAN	X antigen family member 1 OS=Homo sapiens GN=XAGE1A PE=1 SV=3	1	27.46	11492.2	9377.79	7129.87	9333.3
RAN_HUMAN	GTP-binding nuclear protein Ran OS=Homo sapiens GN=RAN PE=1 SV=3	1	32.37	8999.04	11477.4	7461.19	9312.54
NPNT_HUMAN	Nephronectin OS=Homo sapiens GN=NPNT PE=2 SV=3	1	23.14	11978.4	700.243	15208.8	9295.81
RAC1_HUMAN	Ras-related C3 botulinum toxin substrate 1 OS=Homo sapiens GN=RAC1 PE=1 SV=1	1	46.07	11287	10266.7	6275.97	9276.55
MVD1_HUMAN	Diphosphomevalonate decarboxylase OS=Homo sapiens GN=MVD PE=1 SV=1	1	20.85	10364.4	7181.12	10205.6	9250.37
LEG3_HUMAN	Galectin-3 OS=Homo sapiens GN=LGALS3 PE=1 SV=5	2	66.86	8514.15	8038.14	11093.4	9215.24
MYOF_HUMAN	Myoferlin OS=Homo sapiens GN=MYOF PE=1 SV=1	2	57.14	8282.98	8832.1	10365.2	9160.09
CYS1_HUMAN	Cystin-1 OS=Homo sapiens GN=CYS1 PE=1 SV=1	1	32.31	9086.05	2024.41	16303.3	9137.93
MOXD1_HUMAN	DBH-like monooxygenase protein 1 OS=Homo sapiens GN=MOXD1 PE=1 SV=1	1	23.32	9409.18	10008.9	7878.07	9098.72
PRELP_HUMAN	Prolargin OS=Homo sapiens GN=PRELP PE=1 SV=1	2	83.51	8524.71	10440.3	8258.68	9074.55
PRS10_HUMAN	26S proteasome regulatory subunit 10B OS=Homo sapiens GN=PSMC6 PE=1 SV=1	2	64.27	4349.9	15053.9	7754.92	9052.91
CD59_HUMAN	CD59 glycoprotein OS=Homo sapiens GN=CD59 PE=1 SV=1	1	34.24	9659.5	11832.2	5579.32	9023.68
MGAT1_HUMAN	Alpha-1,3-mannosyl-glycoprotein 2-beta-N-acetylglucosaminyltransferase OS=Homo sapiens GN=MGAT1 PE=1 SV=2	1	25.59	8690.73	9866.51	8404.17	8987.14
AN32B_HUMAN	Acidic leucine-rich nuclear phosphoprotein 32 family member B OS=Homo sapiens GN=ANP32B PE=1 SV=1	2	90.54	6663.31	10027.4	10250	8980.24
GALT2_HUMAN	Polypeptide N-acetylgalactosaminyltransferase 2 OS=Homo sapiens GN=GALNT2 PE=1 SV=1	2	56.84	6446.99	9430.63	10983	8953.56
UROK_HUMAN	Urokinase-type plasminogen activator OS=Homo sapiens GN=PLAU PE=1 SV=2	3	103.9	7175.12	10048.2	8926.48	8716.61
PGRC2_HUMAN	Membrane-associated progesterone receptor component 2 OS=Homo sapiens GN=PGRMC2 PE=1 SV=1	2	60.97	8949.05	10394	6782.05	8708.36
DCR1C_HUMAN	Protein artemis OS=Homo sapiens GN=DCLRE1C PE=1 SV=2	1	26.1	7212.18	9139.78	9446.07	8599.34
ATX2L_HUMAN	Ataxin-2-like protein OS=Homo sapiens GN=ATXN2L PE=1 SV=2	1	23.24	12789.8	495.926	12464.4	8583.4
ETHE1_HUMAN	Persulfide dioxygenase ETHE1, mitochondrial OS=Homo sapiens GN=ETHE1 PE=1 SV=2	1	52.69	7459.96	12577.2	5656.94	8564.7
EPCR_HUMAN	Endothelial protein C receptor OS=Homo sapiens GN=PROCR PE=1 SV=1	1	33.38	7150.78	11456.4	6855.15	8487.45
AAPK1_HUMAN	5'-AMP-activated protein kinase catalytic subunit alpha-1 OS=Homo sapiens GN=PRKAA1 PE=1 SV=4	1	20.21	4983.74	10728.2	9433	8381.66
OSBL7_HUMAN	Oxysterol-binding protein-related protein 7 OS=Homo sapiens GN=OSBPL7 PE=1 SV=1	1	23.12	8787.43	11630	4584.91	8334.13
DERM_HUMAN	Dermatopontin OS=Homo sapiens GN=DPT PE=1 SV=2	1	36.83	9398.93	9755.22	5565.57	8239.91
PRS7_HUMAN	26S proteasome regulatory subunit 7 OS=Homo sapiens GN=PSMC2 PE=1 SV=3	2	149.08	7502.01	9723.36	7323.94	8183.1
BTAF1_HUMAN	TATA-binding protein-associated factor 172 OS=Homo sapiens GN=BTAF1 PE=1 SV=2	1	34.1	9666.75	7395.5	7467.15	8176.47
SEM3B_HUMAN	Semaphorin-3B OS=Homo sapiens GN=SEMA3B PE=2 SV=1	1	67.21	9330.6	9319.14	5855.18	8168.31
GOLM1_HUMAN	Golgi membrane protein 1 OS=Homo sapiens GN=GOLM1 PE=1 SV=1	3	94.62	6955.84	8371.28	9049.53	8125.55
GREM1_HUMAN	Gremlin-1 OS=Homo sapiens GN=GREM1 PE=1 SV=1	3	127.13	12024.6	3043.42	9232.45	8100.17
RPN1_HUMAN	Dolichyl-diphosphooligosaccharide--protein glycosyltransferase subunit 1 OS=Homo sapiens GN=RPN1 PE=1 SV=1	2	70.18	7164.46	10131.6	6957.73	8084.6
GRN_HUMAN	Granulins OS=Homo sapiens GN=GRN PE=1 SV=2	1	24.94	10555.7	6355.02	7243.16	8051.29
SYTL5_HUMAN	Synaptotagmin-like protein 5 OS=Homo sapiens GN=SYTL5 PE=1 SV=1	1	26.22	8233.62	12612.5	2958.92	7935.01
CRLF1_HUMAN	Cytokine receptor-like factor 1 OS=Homo sapiens GN=CRLF1 PE=1 SV=1	2	87.52	7039.5	7010.8	9679.46	7909.92
TRY3_HUMAN	Trypsin-3 OS=Homo sapiens GN=PRSS3 PE=1 SV=2	1	61.36	7080.46	8526.38	8077.43	7894.76
DNA2_HUMAN	DNA replication ATP-dependent helicase/nuclease DNA2 OS=Homo sapiens GN=DNA2 PE=1 SV=3	1	24.3	7296.59	9736.23	6636.34	7889.72
SPEE_HUMAN	Spermidine synthase OS=Homo sapiens GN=SRM PE=1 SV=1	1	25.46	9991.81	7903.69	5688.62	7861.38
CNN3_HUMAN	Calponin-3 OS=Homo sapiens GN=CNN3 PE=1 SV=1	1	32.24	10166.5	4006.77	9363.42	7845.58
NTRI_HUMAN	Neurotrimin OS=Homo sapiens GN=NTM PE=1 SV=1	2	57.59	4844.37	11731.5	6879.05	7818.31
SNX9_HUMAN	Sorting nexin-9 OS=Homo sapiens GN=SNX9 PE=1 SV=1	1	48.56	7926.77	8874.73	6564.11	7788.54
ACTZ_HUMAN	Alpha-centractin OS=Homo sapiens GN=ACTR1A PE=1 SV=1	2	88.78	6208.21	7568.7	9472.95	7749.96
RL7A_HUMAN	60S ribosomal protein L7a OS=Homo sapiens GN=RPL7A PE=1 SV=2	1	38.5	10223.6	5943.65	6957.9	7708.4
CADH6_HUMAN	Cadherin-6 OS=Homo sapiens GN=CDH6 PE=1 SV=1	4	151.92	7063.31	10418.3	5636.15	7705.91
EIF3B_HUMAN	Eukaryotic translation initiation factor 3 subunit B OS=Homo sapiens GN=EIF3B PE=1 SV=3	1	75.45	4973.42	9688.59	8441.87	7701.3
KAPCA_HUMAN	cAMP-dependent protein kinase catalytic subunit alpha OS=Homo sapiens GN=PRKACA PE=1 SV=2	2	62.49	6456.19	7716.84	8851.84	7674.96
S3TC1_HUMAN	SH3 domain and tetratricopeptide repeat-containing protein 1 OS=Homo sapiens GN=SH3TC1 PE=1 SV=3	1	26.09	8814.45	7070.97	7079.27	7654.9
ARPC5_HUMAN	Actin-related protein 2/3 complex subunit 5 OS=Homo sapiens GN=ARPC5 PE=1 SV=3	1	38.02	10621	6356.12	5889.1	7622.08
CAZA1_HUMAN	F-actin-capping protein subunit alpha-1 OS=Homo sapiens GN=CAPZA1 PE=1 SV=3	1	106.92	6021.13	11119.4	5718.31	7619.63
CXL17_HUMAN	C-X-C motif chemokine 17 OS=Homo sapiens GN=CXCL17 PE=1 SV=1	1	30.83	12876.2	598.653	9371.77	7615.54
STC2_HUMAN	Stanniocalcin-2 OS=Homo sapiens GN=STC2 PE=1 SV=1	2	134.81	7837.54	7496.27	7298.73	7544.18
PCDGF_HUMAN	Protocadherin gamma-B3 OS=Homo sapiens GN=PCDHGB3 PE=1 SV=4	1	29.92	7261.08	7065.49	8182.49	7503.02
CLIP1_HUMAN	CAP-Gly domain-containing linker protein 1 OS=Homo sapiens GN=CLIP1 PE=1 SV=2	1	21.89	7604.75	5641.18	9260.94	7502.29
ITIH3_HUMAN	Inter-alpha-trypsin inhibitor heavy chain H3 OS=Homo sapiens GN=ITIH3 PE=1 SV=2	1	42.06	5992.77	13296.7	3141.76	7477.08
BACH_HUMAN	Cytosolic acyl coenzyme A thioester hydrolase OS=Homo sapiens GN=ACOT7 PE=1 SV=3	1	20.49	6739.79	10062.6	5489.62	7430.68
NCOR1_HUMAN	Nuclear receptor corepressor 1 OS=Homo sapiens GN=NCOR1 PE=1 SV=2	1	27.26	7561.18	8486.43	6238.65	7428.75
EXT1_HUMAN	Exostosin-1 OS=Homo sapiens GN=EXT1 PE=1 SV=2	1	25.09	8326.54	7720.34	6215.28	7420.72
TGBR3_HUMAN	Transforming growth factor beta receptor type 3 OS=Homo sapiens GN=TGFBR3 PE=1 SV=3	3	153.58	7049.34	4774.34	10290.1	7371.25
GSTO1_HUMAN	Glutathione S-transferase omega-1 OS=Homo sapiens GN=GSTO1 PE=1 SV=2	1	32.85	8054.57	7299.08	6713.79	7355.81
HMCN1_HUMAN	Hemicentin-1 OS=Homo sapiens GN=HMCN1 PE=1 SV=2	1	23.54	5644.33	10951.8	5246.5	7280.88
CC136_HUMAN	Coiled-coil domain-containing protein 136 OS=Homo sapiens GN=CCDC136 PE=1 SV=3	1	23.69	9648.2	10158.2	1896.47	7234.28
PAI2_HUMAN	Plasminogen activator inhibitor 2 OS=Homo sapiens GN=SERPINB2 PE=1 SV=2	3	104.98	5576.16	8920.43	6698.77	7065.12
POP1_HUMAN	Ribonucleases P/MRP protein subunit POP1 OS=Homo sapiens GN=POP1 PE=1 SV=2	2	65.49	6946.59	6545.46	7647.14	7046.39
A1BG_HUMAN	Alpha-1B-glycoprotein OS=Homo sapiens GN=A1BG PE=1 SV=4	1	24.63	7687.66	9330.03	4115.37	7044.35
PD1L2_HUMAN	Programmed cell death 1 ligand 2 OS=Homo sapiens GN=PDCD1LG2 PE=1 SV=2	2	72.71	7340.44	7064.23	6695	7033.22
BICL1_HUMAN	BICD family-like cargo adapter 1 OS=Homo sapiens GN=BICDL1 PE=2 SV=2	1	20.82	3351.03	11928.7	5789.54	7023.08
DBF4B_HUMAN	Protein DBF4 homolog B OS=Homo sapiens GN=DBF4B PE=1 SV=1	1	24.88	9265.62	9632.71	1632.29	6843.54
C1QT5_HUMAN	Complement C1q tumor necrosis factor-related protein 5 OS=Homo sapiens GN=C1QTNF5 PE=1 SV=1	1	27.55	7858.65	6824.64	5843.93	6842.41
SEPT9_HUMAN	Septin-9 OS=Homo sapiens GN=SEPT9 PE=1 SV=2	2	54.2	6196.56	8791.81	5438.55	6808.97
ZN781_HUMAN	Zinc finger protein 781 OS=Homo sapiens GN=ZNF781 PE=2 SV=1	1	22.44	4119.39	9965.36	6142.36	6742.37
PTPRK_HUMAN	Receptor-type tyrosine-protein phosphatase kappa OS=Homo sapiens GN=PTPRK PE=1 SV=2	2	93.35	4932.66	10014.2	5247.56	6731.49
TRIM2_HUMAN	Tripartite motif-containing protein 2 OS=Homo sapiens GN=TRIM2 PE=1 SV=1	1	21.44	5969.99	10069.7	4025.06	6688.25
PPIC_HUMAN	Peptidyl-prolyl cis-trans isomerase C OS=Homo sapiens GN=PPIC PE=1 SV=1	3	97.62	8050.42	6154.84	5757.59	6654.29
ITIH1_HUMAN	Inter-alpha-trypsin inhibitor heavy chain H1 OS=Homo sapiens GN=ITIH1 PE=1 SV=3	1	70.71	6074.42	8234.03	5481.28	6596.58
MYPN_HUMAN	Myopalladin OS=Homo sapiens GN=MYPN PE=1 SV=2	1	21.84	6221.62	7576.42	5971.55	6589.87
MSMB_HUMAN	Beta-microseminoprotein OS=Homo sapiens GN=MSMB PE=1 SV=1	1	21.84	5787.71	5139.87	8583.68	6503.76
NCBP2_HUMAN	Nuclear cap-binding protein subunit 2 OS=Homo sapiens GN=NCBP2 PE=1 SV=1	1	25.74	7394.03	5518.13	6553.22	6488.46
PGM1_HUMAN	Phosphoglucomutase-1 OS=Homo sapiens GN=PGM1 PE=1 SV=3	3	73.58	5053.4	7743.7	6656.11	6484.4
AAAT_HUMAN	Neutral amino acid transporter B(0) OS=Homo sapiens GN=SLC1A5 PE=1 SV=2	2	88.52	4812.02	6420.62	8192.66	6475.1
GSE1_HUMAN	Genetic suppressor element 1 OS=Homo sapiens GN=GSE1 PE=1 SV=3	1	25.59	292.057	18440.1	676.507	6469.57
PRS8_HUMAN	26S proteasome regulatory subunit 8 OS=Homo sapiens GN=PSMC5 PE=1 SV=1	1	94.63	5962.74	6414.99	6926.5	6434.74
CUTA_HUMAN	Protein CutA OS=Homo sapiens GN=CUTA PE=1 SV=2	1	22.12	5503.66	7625.47	6166.37	6431.83
MYO1C_HUMAN	Unconventional myosin-Ic OS=Homo sapiens GN=MYO1C PE=1 SV=4	1	24.72	5657.66	7908.91	5515.77	6360.78
EGLN_HUMAN	Endoglin OS=Homo sapiens GN=ENG PE=1 SV=2	2	82.84	7201.83	5502.72	6316.75	6340.43
TEX2_HUMAN	Testis-expressed protein 2 OS=Homo sapiens GN=TEX2 PE=1 SV=2	1	31.01	7800.64	2356.32	8805.64	6320.87
ESM1_HUMAN	Endothelial cell-specific molecule 1 OS=Homo sapiens GN=ESM1 PE=1 SV=2	2	70.79	4347.07	10043	4518.75	6302.93
NFASC_HUMAN	Neurofascin OS=Homo sapiens GN=NFASC PE=1 SV=4	3	120.06	8320.56	4305.94	6225.17	6283.89
GGH_HUMAN	Gamma-glutamyl hydrolase OS=Homo sapiens GN=GGH PE=1 SV=2	3	124.4	6074.84	6945.29	5752.86	6257.66
EFTU_HUMAN	Elongation factor Tu, mitochondrial OS=Homo sapiens GN=TUFM PE=1 SV=2	3	82.78	4470.76	6202	8032.5	6235.09
RNH1_HUMAN	Ribonuclease H1 OS=Homo sapiens GN=RNASEH1 PE=1 SV=2	1	22.99	4603.77	10266.5	3744.88	6205.05
NQO1_HUMAN	NAD(P)H dehydrogenase [quinone] 1 OS=Homo sapiens GN=NQO1 PE=1 SV=1	2	82.44	6269.2	7753.3	4579.54	6200.68
PUR6_HUMAN	Multifunctional protein ADE2 OS=Homo sapiens GN=PAICS PE=1 SV=3	2	99.45	4758.7	2716.99	11091.6	6189.09
RS25_HUMAN	40S ribosomal protein S25 OS=Homo sapiens GN=RPS25 PE=1 SV=1	1	44.54	7447.18	7098.31	3976.68	6174.06
PTBP1_HUMAN	Polypyrimidine tract-binding protein 1 OS=Homo sapiens GN=PTBP1 PE=1 SV=1	1	29.33	4262.47	8648.63	5528.19	6146.43
SCRN1_HUMAN	Secernin-1 OS=Homo sapiens GN=SCRN1 PE=1 SV=2	1	47.68	6218.48	6337.54	5815.83	6123.95
FA81B_HUMAN	Protein FAM81B OS=Homo sapiens GN=FAM81B PE=1 SV=3	1	23.02	5112.96	4402.05	8656.25	6057.09
DNJA2_HUMAN	DnaJ homolog subfamily A member 2 OS=Homo sapiens GN=DNAJA2 PE=1 SV=1	1	45.54	6534.41	4989.4	6629.58	6051.13
RL15_HUMAN	60S ribosomal protein L15 OS=Homo sapiens GN=RPL15 PE=1 SV=2	1	36.53	7456.85	6339.28	4290.18	6028.77
MRC2_HUMAN	C-type mannose receptor 2 OS=Homo sapiens GN=MRC2 PE=1 SV=2	4	132.46	5083.29	6001.85	6829.2	5971.45
OLA1_HUMAN	Obg-like ATPase 1 OS=Homo sapiens GN=OLA1 PE=1 SV=2	2	66.16	8398.07	4142.84	5354.79	5965.23
MACF1_HUMAN	Microtubule-actin cross-linking factor 1, isoforms 1/2/3/5 OS=Homo sapiens GN=MACF1 PE=1 SV=4	1	21.96	6509.97	6545.09	4836.41	5963.83
ZCH13_HUMAN	Zinc finger CCHC domain-containing protein 13 OS=Homo sapiens GN=ZCCHC13 PE=1 SV=1	1	26.47	4063.43	8812.89	4973.86	5950.06
PARK7_HUMAN	Protein/nucleic acid deglycase DJ-1 OS=Homo sapiens GN=PARK7 PE=1 SV=2	1	27.34	4601.21	10109.6	3106.25	5939
THIM_HUMAN	3-ketoacyl-CoA thiolase, mitochondrial OS=Homo sapiens GN=ACAA2 PE=1 SV=2	1	41.4	6488.71	7001.66	4282.12	5924.17
CPNE1_HUMAN	Copine-1 OS=Homo sapiens GN=CPNE1 PE=1 SV=1	2	79.69	6720.78	5473.05	5552.68	5915.5
GRAK_HUMAN	Granzyme K OS=Homo sapiens GN=GZMK PE=1 SV=1	1	23.03	9497.81	218.008	7992.32	5902.71
ERAP1_HUMAN	Endoplasmic reticulum aminopeptidase 1 OS=Homo sapiens GN=ERAP1 PE=1 SV=3	1	47.31	4919.6	7142.87	5616.99	5893.15
PP2AA_HUMAN	Serine/threonine-protein phosphatase 2A catalytic subunit alpha isoform OS=Homo sapiens GN=PPP2CA PE=1 SV=1	1	23.85	5940.78	5465.78	6179.59	5862.05
UBP47_HUMAN	Ubiquitin carboxyl-terminal hydrolase 47 OS=Homo sapiens GN=USP47 PE=1 SV=3	1	29.91	5190.62	6242.48	6098.16	5843.75
RECQ1_HUMAN	ATP-dependent DNA helicase Q1 OS=Homo sapiens GN=RECQL PE=1 SV=3	1	20.26	5985.36	6593.94	4759.9	5779.73
DYH1_HUMAN	Dynein heavy chain 1, axonemal OS=Homo sapiens GN=DNAH1 PE=1 SV=4	1	35.84	9023.36	1824.62	6472.08	5773.36
FBRL_HUMAN	rRNA 2'-O-methyltransferase fibrillarin OS=Homo sapiens GN=FBL PE=1 SV=2	1	31.28	5509.21	8073.58	3655.96	5746.25
GBRE_HUMAN	Gamma-aminobutyric acid receptor subunit epsilon OS=Homo sapiens GN=GABRE PE=2 SV=2	1	20.41	5904.29	7130.21	3976.13	5670.21
ADGB_HUMAN	Androglobin OS=Homo sapiens GN=ADGB PE=2 SV=3	1	24.22	4433.32	12347.1	208.037	5662.83
HID1_HUMAN	Protein HID1 OS=Homo sapiens GN=HID1 PE=1 SV=1	1	40.4	6141.52	6301.52	4520.65	5654.56
RL24_HUMAN	60S ribosomal protein L24 OS=Homo sapiens GN=RPL24 PE=1 SV=1	1	30.33	7067.94	6599.29	3245.08	5637.44
WNT7B_HUMAN	Protein Wnt-7b OS=Homo sapiens GN=WNT7B PE=2 SV=2	1	33.57	6599.86	4450.94	5785.62	5612.14
CC112_HUMAN	Coiled-coil domain-containing protein 112 OS=Homo sapiens GN=CCDC112 PE=1 SV=2	1	20.46	5107.18	4913	6725.96	5582.05
SYRC_HUMAN	Arginine--tRNA ligase, cytoplasmic OS=Homo sapiens GN=RARS PE=1 SV=2	1	23.05	5814.45	5606.97	5171.29	5530.9
GPC6_HUMAN	Glypican-6 OS=Homo sapiens GN=GPC6 PE=1 SV=1	2	65.61	5187.63	5607.92	5753.14	5516.23
RL10A_HUMAN	60S ribosomal protein L10a OS=Homo sapiens GN=RPL10A PE=1 SV=2	1	47.47	6291.48	6264.36	3985.89	5513.91
PCKGM_HUMAN	Phosphoenolpyruvate carboxykinase [GTP], mitochondrial OS=Homo sapiens GN=PCK2 PE=1 SV=3	2	62.65	3498.78	9430.83	3600.71	5510.11
MXRA8_HUMAN	Matrix remodeling-associated protein 8 OS=Homo sapiens GN=MXRA8 PE=1 SV=1	1	50.87	4599.48	5897.74	5988.97	5495.4
PRS23_HUMAN	Serine protease 23 OS=Homo sapiens GN=PRSS23 PE=1 SV=1	2	64.88	6151.85	6104.34	4222.24	5492.81
LRC15_HUMAN	Leucine-rich repeat-containing protein 15 OS=Homo sapiens GN=LRRC15 PE=2 SV=2	2	75.6	6497.98	4543.57	5369.59	5470.38
AP2A1_HUMAN	AP-2 complex subunit alpha-1 OS=Homo sapiens GN=AP2A1 PE=1 SV=3	1	24.99	4854.96	7007.88	4530.67	5464.5
PSD11_HUMAN	26S proteasome non-ATPase regulatory subunit 11 OS=Homo sapiens GN=PSMD11 PE=1 SV=3	1	29.64	3940.2	6745.9	5692.27	5459.46
ANXA4_HUMAN	Annexin A4 OS=Homo sapiens GN=ANXA4 PE=1 SV=4	1	69.59	5257.63	5357.03	5611.87	5408.84
GPDM_HUMAN	Glycerol-3-phosphate dehydrogenase, mitochondrial OS=Homo sapiens GN=GPD2 PE=1 SV=3	2	54.06	4580.53	4658.7	6967.31	5402.18
CCD18_HUMAN	Coiled-coil domain-containing protein 18 OS=Homo sapiens GN=CCDC18 PE=1 SV=1	1	41.74	5313.41	5847.18	5028.37	5396.32
ARPC4_HUMAN	Actin-related protein 2/3 complex subunit 4 OS=Homo sapiens GN=ARPC4 PE=1 SV=3	1	27.87	6596.87	6322.38	3256.33	5391.86
RS5_HUMAN	40S ribosomal protein S5 OS=Homo sapiens GN=RPS5 PE=1 SV=4	1	25.87	5044.66	5254.98	5788.11	5362.58
KCC2D_HUMAN	Calcium/calmodulin-dependent protein kinase type II subunit delta OS=Homo sapiens GN=CAMK2D PE=1 SV=3	1	57.67	9500.86	2515.43	4056.96	5357.75
MMP14_HUMAN	Matrix metalloproteinase-14 OS=Homo sapiens GN=MMP14 PE=1 SV=3	1	46.39	6668.9	3761.24	5633.07	5354.4
NASP_HUMAN	Nuclear autoantigenic sperm protein OS=Homo sapiens GN=NASP PE=1 SV=2	1	25.92	5291.98	411.801	10202.1	5301.95
HNRPR_HUMAN	Heterogeneous nuclear ribonucleoprotein R OS=Homo sapiens GN=HNRNPR PE=1 SV=1	1	97.63	4390.32	5696.04	5624.39	5236.92
RGMB_HUMAN	RGM domain family member B OS=Homo sapiens GN=RGMB PE=1 SV=3	1	26.52	4785.09	7490.38	3376.66	5217.38
DLDH_HUMAN	Dihydrolipoyl dehydrogenase, mitochondrial OS=Homo sapiens GN=DLD PE=1 SV=2	1	48.96	3750.04	7532.32	4232.21	5171.52
PLD3_HUMAN	Phospholipase D3 OS=Homo sapiens GN=PLD3 PE=1 SV=1	1	33.29	5778.01	5128.23	4527.78	5144.67
ILEU_HUMAN	Leukocyte elastase inhibitor OS=Homo sapiens GN=SERPINB1 PE=1 SV=1	1	32.87	4352.25	5980.37	5064.05	5132.22
NRP1_HUMAN	Neuropilin-1 OS=Homo sapiens GN=NRP1 PE=1 SV=3	1	56.88	2359.71	7919.16	5103.75	5127.54
HNRDL_HUMAN	Heterogeneous nuclear ribonucleoprotein D-like OS=Homo sapiens GN=HNRNPDL PE=1 SV=3	1	137.52	4686.91	6326.56	4335.73	5116.4
PRS6A_HUMAN	26S proteasome regulatory subunit 6A OS=Homo sapiens GN=PSMC3 PE=1 SV=3	1	36.65	5544.95	6193.79	3606.31	5115.02
DNS2A_HUMAN	Deoxyribonuclease-2-alpha OS=Homo sapiens GN=DNASE2 PE=1 SV=2	1	49.07	4733.67	5557.87	5031.61	5107.72
EIF3F_HUMAN	Eukaryotic translation initiation factor 3 subunit F OS=Homo sapiens GN=EIF3F PE=1 SV=1	1	41.13	4648.25	4667.02	5956.47	5090.58
TPM3_HUMAN	Tropomyosin alpha-3 chain OS=Homo sapiens GN=TPM3 PE=1 SV=2	1	104.02	5158.38	5234.15	4726.21	5039.58
GAS8_HUMAN	Growth arrest-specific protein 8 OS=Homo sapiens GN=GAS8 PE=1 SV=1	1	22.52	4627.82	5479.5	4854.07	4987.13
ASPH_HUMAN	Aspartyl/asparaginyl beta-hydroxylase OS=Homo sapiens GN=ASPH PE=1 SV=3	2	108.63	2184.67	11555.8	1057.28	4932.6
FAAA_HUMAN	Fumarylacetoacetase OS=Homo sapiens GN=FAH PE=1 SV=2	2	63.57	3216.03	7208.02	4135.25	4853.1
FA10_HUMAN	Coagulation factor X OS=Homo sapiens GN=F10 PE=1 SV=2	1	37.62	4978.71	5984.92	3584.87	4849.5
S22AP_HUMAN	Solute carrier family 22 member 25 OS=Homo sapiens GN=SLC22A25 PE=2 SV=2	1	33.84	3668.65	8770.61	2100.58	4846.62
ML12A_HUMAN	Myosin regulatory light chain 12A OS=Homo sapiens GN=MYL12A PE=1 SV=2	1	40.06	5721.26	3544.14	5266.18	4843.86
CSPG4_HUMAN	Chondroitin sulfate proteoglycan 4 OS=Homo sapiens GN=CSPG4 PE=1 SV=2	1	34.07	6541.96	5093.66	2892.65	4842.76
TRFM_HUMAN	Melanotransferrin OS=Homo sapiens GN=MELTF PE=1 SV=2	1	28.3	6787.96	1198.23	6444.43	4810.21
PP1A_HUMAN	Serine/threonine-protein phosphatase PP1-alpha catalytic subunit OS=Homo sapiens GN=PPP1CA PE=1 SV=1	2	65.84	8495.43	3922.21	1989.17	4802.27
PCDGK_HUMAN	Protocadherin gamma-C3 OS=Homo sapiens GN=PCDHGC3 PE=1 SV=1	1	31.17	3856.06	5624.28	4907.44	4795.93
RRAS_HUMAN	Ras-related protein R-Ras OS=Homo sapiens GN=RRAS PE=1 SV=1	1	25.5	5200.51	4820.23	4280.01	4766.92
PSB6_HUMAN	Proteasome subunit beta type-6 OS=Homo sapiens GN=PSMB6 PE=1 SV=4	1	38.76	5780.39	3897.13	4579.35	4752.29
MRP2_HUMAN	Canalicular multispecific organic anion transporter 1 OS=Homo sapiens GN=ABCC2 PE=1 SV=3	1	25.26	6307.71	1315.11	6624.17	4749
ARSB_HUMAN	Arylsulfatase B OS=Homo sapiens GN=ARSB PE=1 SV=1	1	24.1	4038.76	3060.88	7075.65	4725.1
PDK2_HUMAN	[Pyruvate dehydrogenase (acetyl-transferring)] kinase isozyme 2, mitochondrial OS=Homo sapiens GN=PDK2 PE=1 SV=2	1	21.11	3558.31	7464.98	2880.26	4634.52
SC24D_HUMAN	Protein transport protein Sec24D OS=Homo sapiens GN=SEC24D PE=1 SV=2	1	36.58	4066.77	4447.02	5324.08	4612.62
SND1_HUMAN	Staphylococcal nuclease domain-containing protein 1 OS=Homo sapiens GN=SND1 PE=1 SV=1	1	44.45	4597.27	3930.26	5287.48	4605.01
CRCC2_HUMAN	Putative ciliary rootlet coiled-coil protein 2 OS=Homo sapiens GN=CROCC2 PE=5 SV=3	1	25.45	6613.96	1852.1	5342.68	4602.91
CATS_HUMAN	Cathepsin S OS=Homo sapiens GN=CTSS PE=1 SV=3	1	42.75	3401.78	6863.39	3486.06	4583.74
CH3L1_HUMAN	Chitinase-3-like protein 1 OS=Homo sapiens GN=CHI3L1 PE=1 SV=2	1	22.85	4182.42	5551.46	3951.53	4561.8
SRSF2_HUMAN	Serine/arginine-rich splicing factor 2 OS=Homo sapiens GN=SRSF2 PE=1 SV=4	1	37.43	5212.48	4416.13	3986.41	4538.34
CLCF1_HUMAN	Cardiotrophin-like cytokine factor 1 OS=Homo sapiens GN=CLCF1 PE=1 SV=1	1	21.61	5224.29	2184.39	6099.08	4502.59
CUBN_HUMAN	Cubilin OS=Homo sapiens GN=CUBN PE=1 SV=5	1	23.95	5002.74	5946.69	2531.7	4493.71
PSA2_HUMAN	Proteasome subunit alpha type-2 OS=Homo sapiens GN=PSMA2 PE=1 SV=2	1	54.48	4205.11	4551.4	4708.09	4488.2
DPP3_HUMAN	Dipeptidyl peptidase 3 OS=Homo sapiens GN=DPP3 PE=1 SV=2	1	32.75	4344.91	5106.17	3983.43	4478.17
WDR75_HUMAN	WD repeat-containing protein 75 OS=Homo sapiens GN=WDR75 PE=1 SV=1	1	20.6	7808.72	386.805	5229.98	4475.17
CAZA2_HUMAN	F-actin-capping protein subunit alpha-2 OS=Homo sapiens GN=CAPZA2 PE=1 SV=3	1	68.65	4477.58	5068.34	3816.83	4454.25
SNIP1_HUMAN	Smad nuclear-interacting protein 1 OS=Homo sapiens GN=SNIP1 PE=1 SV=1	1	23.24	4747.96	3975.9	4634.94	4452.93
ACSL4_HUMAN	Long-chain-fatty-acid--CoA ligase 4 OS=Homo sapiens GN=ACSL4 PE=1 SV=2	1	20.93	1087.58	4563.89	7695.95	4449.14
MTG2_HUMAN	Mitochondrial ribosome-associated GTPase 2 OS=Homo sapiens GN=MTG2 PE=1 SV=1	1	22.55	4413.01	5353.96	3403.27	4390.08
RALYL_HUMAN	RNA-binding Raly-like protein OS=Homo sapiens GN=RALYL PE=1 SV=2	1	38.21	4273.73	5815.28	3052.9	4380.64
EWS_HUMAN	RNA-binding protein EWS OS=Homo sapiens GN=EWSR1 PE=1 SV=1	1	39.37	2430.89	8463.11	2244.2	4379.4
SEPT7_HUMAN	Septin-7 OS=Homo sapiens GN=SEPT7 PE=1 SV=2	1	91.57	4115.28	5174.59	3701.9	4330.59
EXOC7_HUMAN	Exocyst complex component 7 OS=Homo sapiens GN=EXOC7 PE=1 SV=3	1	23.21	3507.44	6518.97	2740.42	4255.61
CLN5_HUMAN	Ceroid-lipofuscinosis neuronal protein 5 OS=Homo sapiens GN=CLN5 PE=1 SV=2	1	23.96	4233.2	4447.21	3910.52	4196.98
TSP3_HUMAN	Thrombospondin-3 OS=Homo sapiens GN=THBS3 PE=1 SV=1	2	136.47	3853.49	4196.18	4502.04	4183.91
SEPR_HUMAN	Prolyl endopeptidase FAP OS=Homo sapiens GN=FAP PE=1 SV=5	4	144.51	3589.24	5970.18	2988.56	4182.66
KLH21_HUMAN	Kelch-like protein 21 OS=Homo sapiens GN=KLHL21 PE=1 SV=4	1	23.98	3478.9	3283.44	5731.37	4164.57
BRE1B_HUMAN	E3 ubiquitin-protein ligase BRE1B OS=Homo sapiens GN=RNF40 PE=1 SV=4	1	21.69	2408.58	8271.89	1745.82	4142.1
TEAD3_HUMAN	Transcriptional enhancer factor TEF-5 OS=Homo sapiens GN=TEAD3 PE=1 SV=2	1	21.81	2177.76	8599.58	1559.85	4112.4
FBX42_HUMAN	F-box only protein 42 OS=Homo sapiens GN=FBXO42 PE=1 SV=1	1	37.07	6617.97	673.233	5022.68	4104.62
VAV3_HUMAN	Guanine nucleotide exchange factor VAV3 OS=Homo sapiens GN=VAV3 PE=1 SV=1	1	22.13	2170.95	7327.66	2777.76	4092.12
DBNL_HUMAN	Drebrin-like protein OS=Homo sapiens GN=DBNL PE=1 SV=1	1	62.56	3059.78	4183.27	4906	4049.68
P4HA1_HUMAN	Prolyl 4-hydroxylase subunit alpha-1 OS=Homo sapiens GN=P4HA1 PE=1 SV=2	1	47.87	5406.46	1760.68	4828.71	3998.62
ZN462_HUMAN	Zinc finger protein 462 OS=Homo sapiens GN=ZNF462 PE=1 SV=3	1	26.25	3645.76	5326.69	3013.5	3995.32
NAGK_HUMAN	N-acetyl-D-glucosamine kinase OS=Homo sapiens GN=NAGK PE=1 SV=4	1	66.91	4457.07	3179.53	4327.2	3987.93
CCD80_HUMAN	Coiled-coil domain-containing protein 80 OS=Homo sapiens GN=CCDC80 PE=1 SV=1	3	139.2	3228.2	3810.37	4777.41	3938.66
EXT2_HUMAN	Exostosin-2 OS=Homo sapiens GN=EXT2 PE=1 SV=1	1	32.77	3837.73	4775.59	3181.75	3931.69
CD9_HUMAN	CD9 antigen OS=Homo sapiens GN=CD9 PE=1 SV=4	1	31.38	3124.13	6196.92	2464.03	3928.36
BASI_HUMAN	Basigin OS=Homo sapiens GN=BSG PE=1 SV=2	1	33.48	4221.15	4026.72	3489.96	3912.61
RB11A_HUMAN	Ras-related protein Rab-11A OS=Homo sapiens GN=RAB11A PE=1 SV=3	1	25.97	3186.42	6016.65	2480.56	3894.54
INT3_HUMAN	Integrator complex subunit 3 OS=Homo sapiens GN=INTS3 PE=1 SV=1	1	28.37	3835.99	852.697	6994.65	3894.45
OAF_HUMAN	Out at first protein homolog OS=Homo sapiens GN=OAF PE=2 SV=1	1	40.72	2298.93	5225.83	4145.81	3890.19
DYH5_HUMAN	Dynein heavy chain 5, axonemal OS=Homo sapiens GN=DNAH5 PE=1 SV=3	1	21.15	4429.33	2534.28	4553.65	3839.09
ETFB_HUMAN	Electron transfer flavoprotein subunit beta OS=Homo sapiens GN=ETFB PE=1 SV=3	2	74.29	4253.77	3443.59	3618.84	3772.06
APOH_HUMAN	Beta-2-glycoprotein 1 OS=Homo sapiens GN=APOH PE=1 SV=3	1	38.05	2516.06	4899.64	3869.54	3761.75
MMP10_HUMAN	Stromelysin-2 OS=Homo sapiens GN=MMP10 PE=1 SV=1	1	210.98	3384.59	4933.43	2956.38	3758.13
SUMO2_HUMAN	Small ubiquitin-related modifier 2 OS=Homo sapiens GN=SUMO2 PE=1 SV=3	1	29.23	3001.63	5498.23	2678.84	3726.24
CRIPT_HUMAN	Cysteine-rich PDZ-binding protein OS=Homo sapiens GN=CRIPT PE=1 SV=1	1	26.12	2424.15	5216.82	3532.52	3724.5
COMT_HUMAN	Catechol O-methyltransferase OS=Homo sapiens GN=COMT PE=1 SV=2	1	22.63	6437.74	2189.04	2534.88	3720.55
ACOC_HUMAN	Cytoplasmic aconitate hydratase OS=Homo sapiens GN=ACO1 PE=1 SV=3	1	33.54	1708.47	5851.78	3572.8	3711.02
EF1A2_HUMAN	Elongation factor 1-alpha 2 OS=Homo sapiens GN=EEF1A2 PE=1 SV=1	1	201.43	4528.45	291.092	6306.15	3708.56
F13A_HUMAN	Coagulation factor XIII A chain OS=Homo sapiens GN=F13A1 PE=1 SV=4	1	41.85	2565.71	3752.09	4805.65	3707.82
SDCB1_HUMAN	Syntenin-1 OS=Homo sapiens GN=SDCBP PE=1 SV=1	1	68.66	3667.06	524.793	6923.32	3705.06
SDHA_HUMAN	Succinate dehydrogenase [ubiquinone] flavoprotein subunit, mitochondrial OS=Homo sapiens GN=SDHA PE=1 SV=2	1	47.46	7508.6	332.775	3221.24	3687.54
METRL_HUMAN	Meteorin-like protein OS=Homo sapiens GN=METRNL PE=2 SV=1	1	26.48	3609.29	4718.76	2688.74	3672.26
SLIT1_HUMAN	Slit homolog 1 protein OS=Homo sapiens GN=SLIT1 PE=2 SV=4	1	30.11	5805.2	461.771	4720.42	3662.47
RL18_HUMAN	60S ribosomal protein L18 OS=Homo sapiens GN=RPL18 PE=1 SV=2	1	49.42	4808.18	4492.14	1632.9	3644.41
IMDH2_HUMAN	Inosine-5'-monophosphate dehydrogenase 2 OS=Homo sapiens GN=IMPDH2 PE=1 SV=2	1	29.09	3612.49	4871.2	2330.63	3604.77
EPDR1_HUMAN	Mammalian ependymin-related protein 1 OS=Homo sapiens GN=EPDR1 PE=1 SV=2	1	46.6	4079.18	3675.93	3055.65	3603.59
AL7A1_HUMAN	Alpha-aminoadipic semialdehyde dehydrogenase OS=Homo sapiens GN=ALDH7A1 PE=1 SV=5	1	20.18	3416.86	5190.32	2193.98	3600.39
TETN_HUMAN	Tetranectin OS=Homo sapiens GN=CLEC3B PE=1 SV=3	1	23.01	4061.47	4058.43	2624.68	3581.53
CRYL1_HUMAN	Lambda-crystallin homolog OS=Homo sapiens GN=CRYL1 PE=1 SV=3	1	23.62	11.1834	9789.6	933.862	3578.22
RS23_HUMAN	40S ribosomal protein S23 OS=Homo sapiens GN=RPS23 PE=1 SV=3	1	38.29	4946.55	3949.13	1838.06	3577.91
2AAA_HUMAN	Serine/threonine-protein phosphatase 2A 65 kDa regulatory subunit A alpha isoform OS=Homo sapiens GN=PPP2R1A PE=1 SV=4	1	32.99	3053.94	3721.09	3668.13	3481.05
FUCO2_HUMAN	Plasma alpha-L-fucosidase OS=Homo sapiens GN=FUCA2 PE=1 SV=2	1	36.97	3408.59	4099.09	2805.03	3437.57
RISC_HUMAN	Retinoid-inducible serine carboxypeptidase OS=Homo sapiens GN=SCPEP1 PE=1 SV=1	1	52.8	3344.67	4038.77	2911.39	3431.61
ASNA_HUMAN	ATPase ASNA1 OS=Homo sapiens GN=ASNA1 PE=1 SV=2	1	24.67	3601.16	4194.65	2398.66	3398.16
SARDH_HUMAN	Sarcosine dehydrogenase, mitochondrial OS=Homo sapiens GN=SARDH PE=1 SV=1	1	24.2	3180.55	2635.27	4303.38	3373.07
O5AC2_HUMAN	Olfactory receptor 5AC2 OS=Homo sapiens GN=OR5AC2 PE=3 SV=2	1	22.06	3468.58	3499.78	3111.18	3359.85
DKK1_HUMAN	Dickkopf-related protein 1 OS=Homo sapiens GN=DKK1 PE=1 SV=1	1	56.52	2978.76	4621.44	2447.5	3349.23
DDX46_HUMAN	Probable ATP-dependent RNA helicase DDX46 OS=Homo sapiens GN=DDX46 PE=1 SV=2	1	25.56	2355.83	4310.86	3371.81	3346.17
NOE1_HUMAN	Noelin OS=Homo sapiens GN=OLFM1 PE=1 SV=4	1	36.53	2931.47	2875.88	4224.18	3343.85
PLIN3_HUMAN	Perilipin-3 OS=Homo sapiens GN=PLIN3 PE=1 SV=3	1	55.95	3608.21	3907.29	2513.67	3343.05
TCTP_HUMAN	Translationally-controlled tumor protein OS=Homo sapiens GN=TPT1 PE=1 SV=1	1	21.16	3032.94	3169.67	3781.98	3328.2
SON_HUMAN	Protein SON OS=Homo sapiens GN=SON PE=1 SV=4	1	22.23	3539.62	4723.78	1710.86	3324.75
BIEA_HUMAN	Biliverdin reductase A OS=Homo sapiens GN=BLVRA PE=1 SV=2	1	37.59	3498	3415.81	3048.41	3320.74
RAB10_HUMAN	Ras-related protein Rab-10 OS=Homo sapiens GN=RAB10 PE=1 SV=1	3	149.82	2160.56	5143.76	2632.64	3312.32
VP26A_HUMAN	Vacuolar protein sorting-associated protein 26A OS=Homo sapiens GN=VPS26A PE=1 SV=2	1	31.67	3281.33	3536.86	3052.56	3290.25
PDGFC_HUMAN	Platelet-derived growth factor C OS=Homo sapiens GN=PDGFC PE=1 SV=2	1	57.86	1536.78	5694.94	2541.44	3257.72
SRCRL_HUMAN	Soluble scavenger receptor cysteine-rich domain-containing protein SSC5D OS=Homo sapiens GN=SSC5D PE=1 SV=3	1	38.28	3276.31	3066.4	3401.06	3247.92
LAMA1_HUMAN	Laminin subunit alpha-1 OS=Homo sapiens GN=LAMA1 PE=1 SV=2	2	69.58	3425.54	2659.93	3643.38	3242.95
THBG_HUMAN	Thyroxine-binding globulin OS=Homo sapiens GN=SERPINA7 PE=1 SV=2	1	65.74	2465.77	5616.01	1635.72	3239.17
CO8A1_HUMAN	Collagen alpha-1(VIII) chain OS=Homo sapiens GN=COL8A1 PE=1 SV=2	4	143.74	2201.87	3568.14	3934.55	3234.86
PFD5_HUMAN	Prefoldin subunit 5 OS=Homo sapiens GN=PFDN5 PE=1 SV=2	1	25.7	3770.15	2062.97	3839.31	3224.14
HSP13_HUMAN	Heat shock 70 kDa protein 13 OS=Homo sapiens GN=HSPA13 PE=1 SV=1	1	34	3033.91	3888.82	2744.54	3222.42
TIGAR_HUMAN	Fructose-2,6-bisphosphatase TIGAR OS=Homo sapiens GN=TIGAR PE=1 SV=1	1	23.96	3991.76	1772.45	3881.49	3215.23
ESYT1_HUMAN	Extended synaptotagmin-1 OS=Homo sapiens GN=ESYT1 PE=1 SV=1	2	60.77	1849.75	4307.24	3451.86	3202.95
IF2G_HUMAN	Eukaryotic translation initiation factor 2 subunit 3 OS=Homo sapiens GN=EIF2S3 PE=1 SV=3	1	21.41	3487.25	3454.36	2620.79	3187.47
RS7_HUMAN	40S ribosomal protein S7 OS=Homo sapiens GN=RPS7 PE=1 SV=1	1	47.77	3194.35	4208.01	2121.05	3174.47
TTLL5_HUMAN	Tubulin polyglutamylase TTLL5 OS=Homo sapiens GN=TTLL5 PE=1 SV=3	1	25.92	2198.14	5061.07	2230.86	3163.36
PTN_HUMAN	Pleiotrophin OS=Homo sapiens GN=PTN PE=1 SV=1	2	54.21	2256.95	4065.75	3118.32	3147
PPCE_HUMAN	Prolyl endopeptidase OS=Homo sapiens GN=PREP PE=1 SV=2	1	32.5	89.1088	5530.2	3813.38	3144.23
CRTC3_HUMAN	CREB-regulated transcription coactivator 3 OS=Homo sapiens GN=CRTC3 PE=1 SV=2	1	21.82	760.764	4354.62	4234.35	3116.58
SIAE_HUMAN	Sialate O-acetylesterase OS=Homo sapiens GN=SIAE PE=1 SV=1	1	27.05	1813.69	3475.19	3966.82	3085.23
NOV_HUMAN	Protein NOV homolog OS=Homo sapiens GN=NOV PE=1 SV=1	3	169.82	1617.91	4137.89	3497.52	3084.44
WFS1_HUMAN	Wolframin OS=Homo sapiens GN=WFS1 PE=1 SV=2	1	26.93	2655.6	3209.47	3360	3075.02
TCPR2_HUMAN	Tectonin beta-propeller repeat-containing protein 2 OS=Homo sapiens GN=TECPR2 PE=1 SV=4	1	28.85	5864.82	252.897	3082.04	3066.58
GBB4_HUMAN	Guanine nucleotide-binding protein subunit beta-4 OS=Homo sapiens GN=GNB4 PE=1 SV=3	1	73.57	2929.52	3503.13	2630.27	3020.98
ATG2A_HUMAN	Autophagy-related protein 2 homolog A OS=Homo sapiens GN=ATG2A PE=1 SV=3	1	30.8	4141.75	3888.97	991.275	3007.33
DECR_HUMAN	2,4-dienoyl-CoA reductase, mitochondrial OS=Homo sapiens GN=DECR1 PE=1 SV=1	1	35.83	2304.24	2957.81	3751.33	3004.46
UBAC1_HUMAN	Ubiquitin-associated domain-containing protein 1 OS=Homo sapiens GN=UBAC1 PE=1 SV=1	1	27.59	2114.22	3201	3690.28	3001.83
OFD1_HUMAN	Oral-facial-digital syndrome 1 protein OS=Homo sapiens GN=OFD1 PE=1 SV=1	1	24.86	2918.37	2255.08	3791.09	2988.18
ADRM1_HUMAN	Proteasomal ubiquitin receptor ADRM1 OS=Homo sapiens GN=ADRM1 PE=1 SV=2	1	50.91	2584.84	2581.25	3717.28	2961.12
HPSE_HUMAN	Heparanase OS=Homo sapiens GN=HPSE PE=1 SV=2	1	21.68	2938.51	1530.29	4347.42	2938.74
CLAT_HUMAN	Choline O-acetyltransferase OS=Homo sapiens GN=CHAT PE=1 SV=4	1	23.42	179.884	8594.3	12.784	2928.99
PLBL2_HUMAN	Putative phospholipase B-like 2 OS=Homo sapiens GN=PLBD2 PE=1 SV=2	4	127.26	2754.04	2867.58	3073.32	2898.31
RBBP4_HUMAN	Histone-binding protein RBBP4 OS=Homo sapiens GN=RBBP4 PE=1 SV=3	1	38.2	2821.93	2296.38	3429.78	2849.36
XRCC5_HUMAN	X-ray repair cross-complementing protein 5 OS=Homo sapiens GN=XRCC5 PE=1 SV=3	1	77.45	2188.48	2844.97	3490.07	2841.17
XPOT_HUMAN	Exportin-T OS=Homo sapiens GN=XPOT PE=1 SV=2	1	32.11	1147.85	4405.4	2896.29	2816.51
ERF1_HUMAN	Eukaryotic peptide chain release factor subunit 1 OS=Homo sapiens GN=ETF1 PE=1 SV=3	1	39.7	1310.68	4090.39	3017.12	2806.07
S10A4_HUMAN	Protein S100-A4 OS=Homo sapiens GN=S100A4 PE=1 SV=1	1	22.12	3185.86	3246.01	1956.97	2796.28
PSA4_HUMAN	Proteasome subunit alpha type-4 OS=Homo sapiens GN=PSMA4 PE=1 SV=1	1	21.08	2902.33	3057.97	2378.06	2779.45
BRE1A_HUMAN	E3 ubiquitin-protein ligase BRE1A OS=Homo sapiens GN=RNF20 PE=1 SV=2	1	23.61	3216.44	2081.48	2958.6	2752.17
T106B_HUMAN	Transmembrane protein 106B OS=Homo sapiens GN=TMEM106B PE=1 SV=2	1	23.93	4651.11	706.543	2821	2726.22
CD151_HUMAN	CD151 antigen OS=Homo sapiens GN=CD151 PE=1 SV=3	1	20.08	2089.09	2579.83	3459.04	2709.32
P4HA2_HUMAN	Prolyl 4-hydroxylase subunit alpha-2 OS=Homo sapiens GN=P4HA2 PE=1 SV=1	1	21.5	3157.26	2034.97	2934.1	2708.78
ACPH_HUMAN	Acylamino-acid-releasing enzyme OS=Homo sapiens GN=APEH PE=1 SV=4	1	42.38	3556.25	1117.73	3440.31	2704.76
CC121_HUMAN	Coiled-coil domain-containing protein 121 OS=Homo sapiens GN=CCDC121 PE=1 SV=1	1	30.95	3205.02	1490.97	3393.25	2696.41
PTPRS_HUMAN	Receptor-type tyrosine-protein phosphatase S OS=Homo sapiens GN=PTPRS PE=1 SV=3	2	74.41	2137.55	3830.58	2001.92	2656.68
ACSL1_HUMAN	Long-chain-fatty-acid--CoA ligase 1 OS=Homo sapiens GN=ACSL1 PE=1 SV=1	1	25.81	2939.34	1961.92	2964.73	2621.99
NOP56_HUMAN	Nucleolar protein 56 OS=Homo sapiens GN=NOP56 PE=1 SV=4	1	20.99	2962.06	3650.27	1224.71	2612.35
IF4G2_HUMAN	Eukaryotic translation initiation factor 4 gamma 2 OS=Homo sapiens GN=EIF4G2 PE=1 SV=1	1	31.88	2351.02	1670.46	3701.17	2574.22
LPAR1_HUMAN	Lysophosphatidic acid receptor 1 OS=Homo sapiens GN=LPAR1 PE=1 SV=3	1	54.32	1921.08	3032.84	2765.66	2573.19
UTP20_HUMAN	Small subunit processome component 20 homolog OS=Homo sapiens GN=UTP20 PE=1 SV=3	1	20.15	3081.7	842.123	3774.69	2566.17
GSTM3_HUMAN	Glutathione S-transferase Mu 3 OS=Homo sapiens GN=GSTM3 PE=1 SV=3	1	24.89	3623.2	2734.66	1333.45	2563.77
MTAP_HUMAN	S-methyl-5'-thioadenosine phosphorylase OS=Homo sapiens GN=MTAP PE=1 SV=2	1	30.1	28.5017	4651.22	2969.19	2549.64
HORN_HUMAN	Hornerin OS=Homo sapiens GN=HRNR PE=1 SV=2	1	21.39	4074.98	2038.83	1522.97	2545.59
ILK_HUMAN	Integrin-linked protein kinase OS=Homo sapiens GN=ILK PE=1 SV=2	1	31.3	2670.87	3028.77	1886.27	2528.64
MED11_HUMAN	Mediator of RNA polymerase II transcription subunit 11 OS=Homo sapiens GN=MED11 PE=1 SV=2	1	27.15	2495.99	1411.19	3662.16	2523.11
EMSY_HUMAN	BRCA2-interacting transcriptional repressor EMSY OS=Homo sapiens GN=EMSY PE=1 SV=2	1	23.13	3954.44	2060.37	1488.39	2501.07
FGF2_HUMAN	Fibroblast growth factor 2 OS=Homo sapiens GN=FGF2 PE=1 SV=3	1	23.82	2829.87	3007.84	1555.75	2464.49
PAPP1_HUMAN	Pappalysin-1 OS=Homo sapiens GN=PAPPA PE=1 SV=3	1	36.91	3399.18	1326.8	2644.39	2456.79
FHR2_HUMAN	Complement factor H-related protein 2 OS=Homo sapiens GN=CFHR2 PE=1 SV=1	1	24.32	628.471	6174.46	535.534	2446.16
NEUR1_HUMAN	Sialidase-1 OS=Homo sapiens GN=NEU1 PE=1 SV=1	2	105.32	2612.19	2731.24	1988.72	2444.05
ADK_HUMAN	Adenosine kinase OS=Homo sapiens GN=ADK PE=1 SV=2	1	25.84	2991.86	1373.56	2767.78	2377.73
IF4B_HUMAN	Eukaryotic translation initiation factor 4B OS=Homo sapiens GN=EIF4B PE=1 SV=2	2	80.42	2502.05	1968.6	2641.36	2370.67
1A03_HUMAN	HLA class I histocompatibility antigen, A-3 alpha chain OS=Homo sapiens GN=HLA-A PE=1 SV=2	1	295.76	3070.83	758.699	3279.73	2369.75
INHBA_HUMAN	Inhibin beta A chain OS=Homo sapiens GN=INHBA PE=1 SV=2	1	48.66	3171.14	1544.5	2345	2353.55
TXNL1_HUMAN	Thioredoxin-like protein 1 OS=Homo sapiens GN=TXNL1 PE=1 SV=3	1	36.77	2660.36	2396.62	1972.43	2343.14
HNRH3_HUMAN	Heterogeneous nuclear ribonucleoprotein H3 OS=Homo sapiens GN=HNRNPH3 PE=1 SV=2	1	33.86	1665.95	4085.93	1238.06	2329.98
GLYM_HUMAN	Serine hydroxymethyltransferase, mitochondrial OS=Homo sapiens GN=SHMT2 PE=1 SV=3	1	21.15	3096.93	2180.85	1644.03	2307.27
ENAM_HUMAN	Enamelin OS=Homo sapiens GN=ENAM PE=1 SV=3	1	27.68	1169.11	3575.21	2175.29	2306.54
CYBP_HUMAN	Calcyclin-binding protein OS=Homo sapiens GN=CACYBP PE=1 SV=2	1	21.04	2166.29	3099.25	1646.41	2303.98
PROS_HUMAN	Vitamin K-dependent protein S OS=Homo sapiens GN=PROS1 PE=1 SV=1	2	68.21	1609.37	2378.69	2869.95	2286
ANS1A_HUMAN	Ankyrin repeat and SAM domain-containing protein 1A OS=Homo sapiens GN=ANKS1A PE=1 SV=4	1	20.15	1871.37	2595.73	2384.14	2283.75
ATL1_HUMAN	ADAMTS-like protein 1 OS=Homo sapiens GN=ADAMTSL1 PE=1 SV=4	1	35.14	1190.83	3358.54	2279.1	2276.16
OR4L1_HUMAN	Olfactory receptor 4L1 OS=Homo sapiens GN=OR4L1 PE=3 SV=1	1	29.87	2142.09	2646.53	1969.02	2252.55
TWF1_HUMAN	Twinfilin-1 OS=Homo sapiens GN=TWF1 PE=1 SV=3	1	22.78	2019.62	2798.4	1931.76	2249.92
IPO5_HUMAN	Importin-5 OS=Homo sapiens GN=IPO5 PE=1 SV=4	1	27.05	2934.52	2458.16	1298.12	2230.27
C1QT3_HUMAN	Complement C1q tumor necrosis factor-related protein 3 OS=Homo sapiens GN=C1QTNF3 PE=1 SV=1	2	64.63	2665.96	2266.77	1694.15	2208.96
ITIH4_HUMAN	Inter-alpha-trypsin inhibitor heavy chain H4 OS=Homo sapiens GN=ITIH4 PE=1 SV=4	1	29.23	894.637	4508.07	1180.38	2194.37
APOL2_HUMAN	Apolipoprotein L2 OS=Homo sapiens GN=APOL2 PE=1 SV=1	2	80.66	1888.77	2563.25	2105.11	2185.71
ITPR2_HUMAN	Inositol 1,4,5-trisphosphate receptor type 2 OS=Homo sapiens GN=ITPR2 PE=1 SV=2	1	22.22	2779.13	1456.79	2240.27	2158.73
TARSH_HUMAN	Target of Nesh-SH3 OS=Homo sapiens GN=ABI3BP PE=1 SV=1	1	29.4	2432	2261.97	1727.14	2140.37
NAGAB_HUMAN	Alpha-N-acetylgalactosaminidase OS=Homo sapiens GN=NAGA PE=1 SV=2	1	36	1720.04	2743.68	1774.66	2079.46
ARSA_HUMAN	Arylsulfatase A OS=Homo sapiens GN=ARSA PE=1 SV=3	1	62.8	2403.66	2328.92	1308.33	2013.64
SYAC_HUMAN	Alanine--tRNA ligase, cytoplasmic OS=Homo sapiens GN=AARS PE=1 SV=2	1	27.16	1757.91	2120.26	2157.11	2011.76
MICU1_HUMAN	Calcium uptake protein 1, mitochondrial OS=Homo sapiens GN=MICU1 PE=1 SV=1	1	26.78	1469.37	3002.17	1454.14	1975.23
DFNA5_HUMAN	Non-syndromic hearing impairment protein 5 OS=Homo sapiens GN=DFNA5 PE=1 SV=2	1	36.25	1424.52	1921.15	2577.96	1974.54
SQOR_HUMAN	Sulfide:quinone oxidoreductase, mitochondrial OS=Homo sapiens GN=SQOR PE=1 SV=1	1	49.84	1781.53	3035.95	1081.73	1966.41
GFPT1_HUMAN	Glutamine--fructose-6-phosphate aminotransferase [isomerizing] 1 OS=Homo sapiens GN=GFPT1 PE=1 SV=3	1	30.34	2172.48	2627.97	1089.74	1963.4
HDGF_HUMAN	Hepatoma-derived growth factor OS=Homo sapiens GN=HDGF PE=1 SV=1	1	21.29	1368.09	2306.01	2078.02	1917.37
EZRI_HUMAN	Ezrin OS=Homo sapiens GN=EZR PE=1 SV=4	1	219.77	1184.06	1676.93	2856.71	1905.9
MXRA7_HUMAN	Matrix-remodeling-associated protein 7 OS=Homo sapiens GN=MXRA7 PE=1 SV=1	1	28.08	1704.39	1943.78	2059.3	1902.49
VASP_HUMAN	Vasodilator-stimulated phosphoprotein OS=Homo sapiens GN=VASP PE=1 SV=3	1	40.25	529.293	1246.84	3923.34	1899.82
SF3B2_HUMAN	Splicing factor 3B subunit 2 OS=Homo sapiens GN=SF3B2 PE=1 SV=2	1	32.88	2324.38	2729.58	638.612	1897.52
DDAH1_HUMAN	N(G),N(G)-dimethylarginine dimethylaminohydrolase 1 OS=Homo sapiens GN=DDAH1 PE=1 SV=3	1	21.69	1509.65	2420.43	1705.56	1878.54
AMBP_HUMAN	Protein AMBP OS=Homo sapiens GN=AMBP PE=1 SV=1	1	23.89	1241.44	2703.94	1674.52	1873.3
FBXW8_HUMAN	F-box/WD repeat-containing protein 8 OS=Homo sapiens GN=FBXW8 PE=1 SV=2	1	24.08	1550.15	2884.1	1183.86	1872.7
SYT16_HUMAN	Synaptotagmin-16 OS=Homo sapiens GN=SYT16 PE=1 SV=2	1	22.09	2049.67	1438.8	2043.82	1844.1
CLU_HUMAN	Clustered mitochondria protein homolog OS=Homo sapiens GN=CLUH PE=1 SV=2	1	21.99	1737.27	2003.94	1763.09	1834.76
EIF3H_HUMAN	Eukaryotic translation initiation factor 3 subunit H OS=Homo sapiens GN=EIF3H PE=1 SV=1	1	45.84	1282.13	2191.88	2019.35	1831.12
PRDX4_HUMAN	Peroxiredoxin-4 OS=Homo sapiens GN=PRDX4 PE=1 SV=1	1	151.86	2177.63	1964.25	1345.54	1829.14
MET16_HUMAN	U6 small nuclear RNA (adenine-(43)-N(6))-methyltransferase OS=Homo sapiens GN=METTL16 PE=1 SV=2	1	27.27	1627.67	1986.06	1817.2	1810.31
PSMD5_HUMAN	26S proteasome non-ATPase regulatory subunit 5 OS=Homo sapiens GN=PSMD5 PE=1 SV=3	1	30.2	1344.26	2439.39	1639.89	1807.85
PGFRB_HUMAN	Platelet-derived growth factor receptor beta OS=Homo sapiens GN=PDGFRB PE=1 SV=1	1	39.2	1669.61	2492.86	1245	1802.49
MSH2_HUMAN	DNA mismatch repair protein Msh2 OS=Homo sapiens GN=MSH2 PE=1 SV=1	1	24.19	1821.36	3282.7	229.242	1777.77
MK13_HUMAN	Mitogen-activated protein kinase 13 OS=Homo sapiens GN=MAPK13 PE=1 SV=1	1	27.49	1128.65	3583.51	604.76	1772.31
MAP4_HUMAN	Microtubule-associated protein 4 OS=Homo sapiens GN=MAP4 PE=1 SV=3	1	31.04	818.185	3174.34	1317.16	1769.9
SBDS_HUMAN	Ribosome maturation protein SBDS OS=Homo sapiens GN=SBDS PE=1 SV=4	1	50.95	1968.57	2287.44	993.56	1749.86
DCBD2_HUMAN	Discoidin, CUB and LCCL domain-containing protein 2 OS=Homo sapiens GN=DCBLD2 PE=1 SV=1	1	37.25	1052.1	3022.93	1157.96	1744.33
PRDM1_HUMAN	PR domain zinc finger protein 1 OS=Homo sapiens GN=PRDM1 PE=1 SV=2	1	25.41	9.38939	4900.51	312.889	1740.93
PUR9_HUMAN	Bifunctional purine biosynthesis protein PURH OS=Homo sapiens GN=ATIC PE=1 SV=3	1	53.38	1962.5	2223.06	979.082	1721.55
AIFM1_HUMAN	Apoptosis-inducing factor 1, mitochondrial OS=Homo sapiens GN=AIFM1 PE=1 SV=1	2	58.28	1606.37	1639.68	1909.09	1718.38
H10_HUMAN	Histone H1.0 OS=Homo sapiens GN=H1F0 PE=1 SV=3	1	39.54	1798.71	1474.09	1824.38	1699.06
PAIRB_HUMAN	Plasminogen activator inhibitor 1 RNA-binding protein OS=Homo sapiens GN=SERBP1 PE=1 SV=2	1	64.07	1452.38	1544.68	2088.91	1695.32
SPSY_HUMAN	Spermine synthase OS=Homo sapiens GN=SMS PE=1 SV=2	1	34.37	946.143	2277.61	1689.16	1637.64
IGF2_HUMAN	Insulin-like growth factor II OS=Homo sapiens GN=IGF2 PE=1 SV=1	1	33.98	1493.24	1664.22	1750.8	1636.09
QCR1_HUMAN	Cytochrome b-c1 complex subunit 1, mitochondrial OS=Homo sapiens GN=UQCRC1 PE=1 SV=3	1	24.1	1871.35	1955.25	1077.35	1634.65
SEM3C_HUMAN	Semaphorin-3C OS=Homo sapiens GN=SEMA3C PE=2 SV=2	1	33.29	1742.55	1816.25	1299.59	1619.46
GOSR1_HUMAN	Golgi SNAP receptor complex member 1 OS=Homo sapiens GN=GOSR1 PE=1 SV=1	1	31.11	1630.44	1045.27	2179.25	1618.32
SAE1_HUMAN	SUMO-activating enzyme subunit 1 OS=Homo sapiens GN=SAE1 PE=1 SV=1	1	52.87	916.11	2800.21	1055.2	1590.51
MICA3_HUMAN	[F-actin]-monooxygenase MICAL3 OS=Homo sapiens GN=MICAL3 PE=1 SV=2	1	20.13	1195.68	1072.49	2499.59	1589.25
B4GT4_HUMAN	Beta-1,4-galactosyltransferase 4 OS=Homo sapiens GN=B4GALT4 PE=1 SV=1	1	28.43	1176.73	1903.04	1670.94	1583.57
YETS4_HUMAN	YEATS domain-containing protein 4 OS=Homo sapiens GN=YEATS4 PE=1 SV=1	1	27.77	1328.78	2345.14	1053.35	1575.76
NEUS_HUMAN	Neuroserpin OS=Homo sapiens GN=SERPINI1 PE=1 SV=1	2	65.37	891.17	1239.14	2561.58	1563.96
SCNND_HUMAN	Amiloride-sensitive sodium channel subunit delta OS=Homo sapiens GN=SCNN1D PE=1 SV=2	1	22.43	132.378	515.157	4034.17	1560.57
TBA8_HUMAN	Tubulin alpha-8 chain OS=Homo sapiens GN=TUBA8 PE=1 SV=1	1	324.43	1456.08	2547.37	658.655	1554.04
FUMH_HUMAN	Fumarate hydratase, mitochondrial OS=Homo sapiens GN=FH PE=1 SV=3	1	34.59	113.855	2648.57	1790.08	1517.5
SYLM_HUMAN	Probable leucine--tRNA ligase, mitochondrial OS=Homo sapiens GN=LARS2 PE=1 SV=2	1	22.4	1270.26	583.655	2663.17	1505.69
RAB2A_HUMAN	Ras-related protein Rab-2A OS=Homo sapiens GN=RAB2A PE=1 SV=1	1	24.13	1370.54	2684.48	445.721	1500.24
MYPT1_HUMAN	Protein phosphatase 1 regulatory subunit 12A OS=Homo sapiens GN=PPP1R12A PE=1 SV=1	1	50.24	1461.83	1207.52	1806.69	1492.01
LRC4B_HUMAN	Leucine-rich repeat-containing protein 4B OS=Homo sapiens GN=LRRC4B PE=2 SV=3	1	22.71	405.57	3903.06	0.328105	1436.32
CORO6_HUMAN	Coronin-6 OS=Homo sapiens GN=CORO6 PE=1 SV=2	1	28.16	1410.3	2896.43	0	1435.58
AGM1_HUMAN	Phosphoacetylglucosamine mutase OS=Homo sapiens GN=PGM3 PE=1 SV=1	1	36.71	1353.66	2134.38	818.353	1435.46
BC11B_HUMAN	B-cell lymphoma/leukemia 11B OS=Homo sapiens GN=BCL11B PE=1 SV=1	2	41.29	837.378	2428.98	1034.16	1433.51
SMYD5_HUMAN	SET and MYND domain-containing protein 5 OS=Homo sapiens GN=SMYD5 PE=1 SV=2	1	21.81	104.426	4096.74	57.2918	1419.49
LRC40_HUMAN	Leucine-rich repeat-containing protein 40 OS=Homo sapiens GN=LRRC40 PE=1 SV=1	1	35.78	2259.21	134.138	1762	1385.11
PLCD4_HUMAN	1-phosphatidylinositol 4,5-bisphosphate phosphodiesterase delta-4 OS=Homo sapiens GN=PLCD4 PE=2 SV=1	1	24.36	1252.75	1381.07	1496.58	1376.8
FAM3C_HUMAN	Protein FAM3C OS=Homo sapiens GN=FAM3C PE=1 SV=1	1	42.45	1143.3	1424.33	1534.99	1367.54
HPLN1_HUMAN	Hyaluronan and proteoglycan link protein 1 OS=Homo sapiens GN=HAPLN1 PE=2 SV=2	3	105.51	2722.95	607.315	737.656	1355.97
NDKA_HUMAN	Nucleoside diphosphate kinase A OS=Homo sapiens GN=NME1 PE=1 SV=1	1	51.03	1864.86	1378.17	815.732	1352.92
CAN1_HUMAN	Calpain-1 catalytic subunit OS=Homo sapiens GN=CAPN1 PE=1 SV=1	1	27.33	1776.65	860.869	1418.31	1351.94
SAS6_HUMAN	Spindle assembly abnormal protein 6 homolog OS=Homo sapiens GN=SASS6 PE=1 SV=1	1	43.4	783.434	1613.99	1646.1	1347.84
T3HPD_HUMAN	Trans-3-hydroxy-L-proline dehydratase OS=Homo sapiens GN=L3HYPDH PE=1 SV=2	1	26.83	1371.52	1501.8	1140.9	1338.07
TPA_HUMAN	Tissue-type plasminogen activator OS=Homo sapiens GN=PLAT PE=1 SV=1	1	35.26	707.941	2324.79	945.973	1326.23
ANK3_HUMAN	Ankyrin-3 OS=Homo sapiens GN=ANK3 PE=1 SV=3	1	27.59	1007.39	2141.75	749.572	1299.57
OR2B3_HUMAN	Putative olfactory receptor 2B3 OS=Homo sapiens GN=OR2B3 PE=3 SV=1	1	23.74	462.504	3362.09	0	1274.87
RET4_HUMAN	Retinol-binding protein 4 OS=Homo sapiens GN=RBP4 PE=1 SV=3	2	62.33	1089.62	2113.19	575.916	1259.57
IF6_HUMAN	Eukaryotic translation initiation factor 6 OS=Homo sapiens GN=EIF6 PE=1 SV=1	1	20.96	1830.71	1461.12	437.613	1243.15
TTI2_HUMAN	TELO2-interacting protein 2 OS=Homo sapiens GN=TTI2 PE=1 SV=1	1	21.67	1127.66	1539.69	973.751	1213.7
CELR1_HUMAN	Cadherin EGF LAG seven-pass G-type receptor 1 OS=Homo sapiens GN=CELSR1 PE=1 SV=1	1	20.85	1308.69	748.532	1566.13	1207.78
NUCB2_HUMAN	Nucleobindin-2 OS=Homo sapiens GN=NUCB2 PE=1 SV=2	1	29.7	798.121	1456.6	1283.69	1179.47
ACOXL_HUMAN	Acyl-coenzyme A oxidase-like protein OS=Homo sapiens GN=ACOXL PE=2 SV=3	1	28.77	1223.65	1711.83	589.667	1175.05
KINH_HUMAN	Kinesin-1 heavy chain OS=Homo sapiens GN=KIF5B PE=1 SV=1	1	61.04	0	2858.25	543.644	1133.97
MORC3_HUMAN	MORC family CW-type zinc finger protein 3 OS=Homo sapiens GN=MORC3 PE=1 SV=3	1	23.83	666.874	1066.64	1667.8	1133.77
VAT1_HUMAN	Synaptic vesicle membrane protein VAT-1 homolog OS=Homo sapiens GN=VAT1 PE=1 SV=2	1	23.29	1038.4	639.48	1631.11	1103
LMNB2_HUMAN	Lamin-B2 OS=Homo sapiens GN=LMNB2 PE=1 SV=4	1	106.18	861.809	1600.89	811.627	1091.44
ADH1A_HUMAN	Alcohol dehydrogenase 1A OS=Homo sapiens GN=ADH1A PE=1 SV=2	1	29.19	805.747	1260.55	1191.6	1085.96
CRK_HUMAN	Adapter molecule crk OS=Homo sapiens GN=CRK PE=1 SV=2	1	66.25	1456.27	840.614	796.164	1031.02
PA1B2_HUMAN	Platelet-activating factor acetylhydrolase IB subunit beta OS=Homo sapiens GN=PAFAH1B2 PE=1 SV=1	1	40.62	921.404	427.698	1735.52	1028.21
PK1L3_HUMAN	Polycystic kidney disease protein 1-like 3 OS=Homo sapiens GN=PKD1L3 PE=1 SV=1	1	22.22	1100.02	588.992	1353.8	1014.27
RABX5_HUMAN	Rab5 GDP/GTP exchange factor OS=Homo sapiens GN=RABGEF1 PE=1 SV=2	1	22.13	1118.63	1240.92	653.759	1004.44
ODO2_HUMAN	Dihydrolipoyllysine-residue succinyltransferase component of 2-oxoglutarate dehydrogenase complex, mitochondrial OS=Homo sapiens GN=DLST PE=1 SV=4	1	30.62	914.974	1044.75	902.855	954.193
HYOU1_HUMAN	Hypoxia up-regulated protein 1 OS=Homo sapiens GN=HYOU1 PE=1 SV=1	1	26.05	1267.63	325.126	1223.9	938.885
RCBT1_HUMAN	RCC1 and BTB domain-containing protein 1 OS=Homo sapiens GN=RCBTB1 PE=1 SV=1	1	23.99	382.236	1999.33	307.504	896.356
FIBB_HUMAN	Fibrinogen beta chain OS=Homo sapiens GN=FGB PE=1 SV=2	1	31.12	460.475	1467.11	759.469	895.684
ITIH5_HUMAN	Inter-alpha-trypsin inhibitor heavy chain H5 OS=Homo sapiens GN=ITIH5 PE=2 SV=2	3	124.36	600.851	1456.03	530.764	862.549
CA123_HUMAN	UPF0587 protein C1orf123 OS=Homo sapiens GN=C1orf123 PE=1 SV=1	1	37.66	611.435	520.338	1405.32	845.697
1B44_HUMAN	HLA class I histocompatibility antigen, B-44 alpha chain OS=Homo sapiens GN=HLA-B PE=1 SV=1	1	215.07	1002.39	749.757	763.071	838.406
ERP29_HUMAN	Endoplasmic reticulum resident protein 29 OS=Homo sapiens GN=ERP29 PE=1 SV=4	1	41.55	425.285	1298.63	735.826	819.913
PSG1_HUMAN	Pregnancy-specific beta-1-glycoprotein 1 OS=Homo sapiens GN=PSG1 PE=1 SV=1	1	177.63	1276.48	231.32	876.995	794.931
RAI1_HUMAN	Retinoic acid-induced protein 1 OS=Homo sapiens GN=RAI1 PE=1 SV=2	1	23.98	648.637	780.707	943.252	790.865
ETFA_HUMAN	Electron transfer flavoprotein subunit alpha, mitochondrial OS=Homo sapiens GN=ETFA PE=1 SV=1	1	44.82	0	2150.55	163.735	771.429
LKHA4_HUMAN	Leukotriene A-4 hydrolase OS=Homo sapiens GN=LTA4H PE=1 SV=2	1	26.81	189.304	1065.32	976.234	743.62
OBAS1_HUMAN	Putative uncharacterized protein OBSCN-AS1 OS=Homo sapiens GN=OBSCN-AS1 PE=5 SV=1	1	52.11	994.666	615.906	618.681	743.084
TICN1_HUMAN	Testican-1 OS=Homo sapiens GN=SPOCK1 PE=1 SV=1	1	43.33	349.523	1124.91	751.771	742.069
ADAM9_HUMAN	Disintegrin and metalloproteinase domain-containing protein 9 OS=Homo sapiens GN=ADAM9 PE=1 SV=1	1	28.61	1303.91	759.302	159.715	740.976
SIR6_HUMAN	NAD-dependent protein deacetylase sirtuin-6 OS=Homo sapiens GN=SIRT6 PE=1 SV=2	1	34.49	916.539	1019.48	261.343	732.455
LSM10_HUMAN	U7 snRNA-associated Sm-like protein LSm10 OS=Homo sapiens GN=LSM10 PE=1 SV=1	1	22.56	1758.58	84.6109	172.668	671.952
PSD12_HUMAN	26S proteasome non-ATPase regulatory subunit 12 OS=Homo sapiens GN=PSMD12 PE=1 SV=3	1	62.12	210.877	622.914	1137.92	657.236
AKA12_HUMAN	A-kinase anchor protein 12 OS=Homo sapiens GN=AKAP12 PE=1 SV=4	1	30.22	0	1685.23	221.109	635.448
VATA_HUMAN	V-type proton ATPase catalytic subunit A OS=Homo sapiens GN=ATP6V1A PE=1 SV=2	1	25.89	1315.37	161.829	372.342	616.515
TPC1_HUMAN	Two pore calcium channel protein 1 OS=Homo sapiens GN=TPCN1 PE=1 SV=3	1	22.46	686.93	0	1156.77	614.566
MSH3_HUMAN	DNA mismatch repair protein Msh3 OS=Homo sapiens GN=MSH3 PE=1 SV=4	1	23.27	704.999	125.389	1006.81	612.401
ANPRC_HUMAN	Atrial natriuretic peptide receptor 3 OS=Homo sapiens GN=NPR3 PE=1 SV=2	2	68.47	575.274	1150.94	39.6375	588.616
PSME4_HUMAN	Proteasome activator complex subunit 4 OS=Homo sapiens GN=PSME4 PE=1 SV=2	1	52.9	727.633	620.217	372.846	573.565
PCD18_HUMAN	Protocadherin-18 OS=Homo sapiens GN=PCDH18 PE=2 SV=3	1	24.1	734.858	86.5241	789.343	536.908
AL1L1_HUMAN	Cytosolic 10-formyltetrahydrofolate dehydrogenase OS=Homo sapiens GN=ALDH1L1 PE=1 SV=2	1	23.2	0	1454.56	0	484.854
ASM3A_HUMAN	Acid sphingomyelinase-like phosphodiesterase 3a OS=Homo sapiens GN=SMPDL3A PE=1 SV=2	1	23.09	270.362	578.039	442.807	430.403
E41L2_HUMAN	Band 4.1-like protein 2 OS=Homo sapiens GN=EPB41L2 PE=1 SV=1	1	26.69	287.979	611.803	386.12	428.634
NEXN_HUMAN	Nexilin OS=Homo sapiens GN=NEXN PE=1 SV=1	1	20.37	43.4774	1224.26	5.33772	424.357
ASPG_HUMAN	N(4)-(beta-N-acetylglucosaminyl)-L-asparaginase OS=Homo sapiens GN=AGA PE=1 SV=2	1	48.89	353.42	377.299	532.667	421.129
PTHR_HUMAN	Parathyroid hormone-related protein OS=Homo sapiens GN=PTHLH PE=1 SV=1	1	36.87	386.682	531.28	321.585	413.183
OSMR_HUMAN	Oncostatin-M-specific receptor subunit beta OS=Homo sapiens GN=OSMR PE=1 SV=1	1	22.16	317.833	863.574	0	393.802
BGLR_HUMAN	Beta-glucuronidase OS=Homo sapiens GN=GUSB PE=1 SV=2	1	24.64	240.564	589.308	310.004	379.959
UBFL1_HUMAN	Upstream-binding factor 1-like protein 1 OS=Homo sapiens GN=UBTFL1 PE=3 SV=1	1	22.4	158.379	462.747	401.166	340.764
CA094_HUMAN	Uncharacterized protein C1orf94 OS=Homo sapiens GN=C1orf94 PE=1 SV=2	1	33.36	0	773.178	213.554	328.911
ST1B1_HUMAN	Sulfotransferase family cytosolic 1B member 1 OS=Homo sapiens GN=SULT1B1 PE=1 SV=2	1	25.29	88.9304	0	849.432	312.787
ELN_HUMAN	Elastin OS=Homo sapiens GN=ELN PE=1 SV=3	1	36.37	185.352	645.035	42.4403	290.942
EST1A_HUMAN	Telomerase-binding protein EST1A OS=Homo sapiens GN=SMG6 PE=1 SV=2	1	22.49	580.393	0	282.325	287.573
CE85L_HUMAN	Centrosomal protein of 85 kDa-like OS=Homo sapiens GN=CEP85L PE=1 SV=1	1	48.15	197.629	328.983	316.206	280.939
PVR_HUMAN	Poliovirus receptor OS=Homo sapiens GN=PVR PE=1 SV=2	1	24.22	77.3493	409.854	228.461	238.555
CCD51_HUMAN	Coiled-coil domain-containing protein 51 OS=Homo sapiens GN=CCDC51 PE=1 SV=2	1	21.66	141.673	111.27	452.589	235.177
FIBIN_HUMAN	Fin bud initiation factor homolog OS=Homo sapiens GN=FIBIN PE=1 SV=1	1	29.08	199.015	428.65	63.0622	230.242
ANGL4_HUMAN	Angiopoietin-related protein 4 OS=Homo sapiens GN=ANGPTL4 PE=1 SV=2	1	30.15	0	221.024	420.028	213.684
HMGA1_HUMAN	High mobility group protein HMG-I/HMG-Y OS=Homo sapiens GN=HMGA1 PE=1 SV=3	1	30.16	154.34	269.381	139.842	187.855
DHB4_HUMAN	Peroxisomal multifunctional enzyme type 2 OS=Homo sapiens GN=HSD17B4 PE=1 SV=3	1	34.27	0	0	525.5	175.167
PTPRG_HUMAN	Receptor-type tyrosine-protein phosphatase gamma OS=Homo sapiens GN=PTPRG PE=1 SV=4	1	33.77	115.541	131.358	250.591	165.83
IMA1_HUMAN	Importin subunit alpha-1 OS=Homo sapiens GN=KPNA2 PE=1 SV=1	1	53.04	0	443.475	0	147.825
SYYC_HUMAN	Tyrosine--tRNA ligase, cytoplasmic OS=Homo sapiens GN=YARS PE=1 SV=4	1	31.07	0	0	329.548	109.849
CO7A1_HUMAN	Collagen alpha-1(VII) chain OS=Homo sapiens GN=COL7A1 PE=1 SV=2	1	32.57	32.6007	197.293	0	76.6314
ANGT_HUMAN	Angiotensinogen OS=Homo sapiens GN=AGT PE=1 SV=1	1	41.07	95.5481	0	57.6446	51.0643
RS21_HUMAN	40S ribosomal protein S21 OS=Homo sapiens GN=RPS21 PE=1 SV=1	1	26.33	45.4871	17.5701	50.3755	37.8109
FADS1_HUMAN	Fatty acid desaturase 1 OS=Homo sapiens GN=FADS1 PE=1 SV=3	1	24.29	0	109.767	0	36.5891
COBA1_HUMAN	Collagen alpha-1(XI) chain OS=Homo sapiens GN=COL11A1 PE=1 SV=4	1	60.66	36.1067	2.45843	44.3542	27.6398
CCL18_HUMAN	C-C motif chemokine 18 OS=Homo sapiens GN=CCL18 PE=1 SV=1	1	26.95	15.9476	0	0	5.31588
COQ5_HUMAN	2-methoxy-6-polyprenyl-1,4-benzoquinol methylase, mitochondrial OS=Homo sapiens GN=COQ5 PE=1 SV=2	1	23.77	0	0	1.24169	0.413896
SULF2_HUMAN	Extracellular sulfatase Sulf-2 OS=Homo sapiens GN=SULF2 PE=1 SV=1	1	22.91	0	0.157563	0	0.0525209

## Sheet: ERS-PAT1
				Normalized abundance
				ERS-Family 1
Accession	Description	Peptides used for quantitation	Confidence score	Surn_ERS_FAM1_1_01	Surn_ERS_FAM1_2_01	Surn_ERS_FAM1_3_01	Average Abundance
CO1A2_HUMAN	Collagen alpha-2(I) chain OS=Homo sapiens GN=COL1A2 PE=1 SV=7	78	4061.73	8.21175e+07	2.43999e+08	1.46488e+08	1.57535e+08
CO1A1_HUMAN	Collagen alpha-1(I) chain OS=Homo sapiens GN=COL1A1 PE=1 SV=5	43	1992.32	1.6121e+07	4.40819e+07	2.80487e+07	2.94172e+07
MMP2_HUMAN;MMP11_HUMAN	72 kDa type IV collagenase OS=Homo sapiens GN=MMP2 PE=1 SV=2	36	1715.92	2.4018e+07	3.29629e+07	2.45415e+07	2.71741e+07
FINC_HUMAN	Fibronectin OS=Homo sapiens GN=FN1 PE=1 SV=4	59	3015.54	1.46164e+07	1.69988e+07	1.79858e+07	1.65336e+07
C1S_HUMAN	Complement C1s subcomponent OS=Homo sapiens GN=C1S PE=1 SV=1	29	1436.16	1.02384e+07	2.3308e+07	1.47714e+07	1.61059e+07
PCOC1_HUMAN	Procollagen C-endopeptidase enhancer 1 OS=Homo sapiens GN=PCOLCE PE=1 SV=2	19	962.47	1.74383e+07	1.34437e+07	1.55836e+07	1.54885e+07
C1R_HUMAN;C1RL_HUMAN	Complement C1r subcomponent OS=Homo sapiens GN=C1R PE=1 SV=2	29	1511.67	1.07536e+07	1.89736e+07	1.38569e+07	1.4528e+07
CO3_HUMAN	Complement C3 OS=Homo sapiens GN=C3 PE=1 SV=2	55	2612.93	8.90947e+06	1.62025e+07	1.13937e+07	1.21686e+07
PGS2_HUMAN	Decorin OS=Homo sapiens GN=DCN PE=1 SV=1	21	1002.48	7.10883e+06	1.58587e+07	8.86549e+06	1.0611e+07
FBLN1_HUMAN	Fibulin-1 OS=Homo sapiens GN=FBLN1 PE=1 SV=4	21	1126.34	6.33166e+06	1.79202e+07	7.08897e+06	1.0447e+07
CFAB_HUMAN	Complement factor B OS=Homo sapiens GN=CFB PE=1 SV=2	24	1086	5.72154e+06	1.6602e+07	6.23019e+06	9.51791e+06
TSP1_HUMAN;RHG35_HUMAN	Thrombospondin-1 OS=Homo sapiens GN=THBS1 PE=1 SV=2	40	2186.63	6.67681e+06	8.49035e+06	1.14378e+07	8.86833e+06
QSOX1_HUMAN	Sulfhydryl oxidase 1 OS=Homo sapiens GN=QSOX1 PE=1 SV=3	28	1410.62	4.84387e+06	1.22093e+07	6.50668e+06	7.85329e+06
IBP7_HUMAN	Insulin-like growth factor-binding protein 7 OS=Homo sapiens GN=IGFBP7 PE=1 SV=1	16	796.77	5.53636e+06	1.16611e+07	6.1168e+06	7.77142e+06
TIMP1_HUMAN	Metalloproteinase inhibitor 1 OS=Homo sapiens GN=TIMP1 PE=1 SV=1	9	446.08	6.1365e+06	8.48173e+06	6.50882e+06	7.04235e+06
CO6A1_HUMAN	Collagen alpha-1(VI) chain OS=Homo sapiens GN=COL6A1 PE=1 SV=3	28	1347.67	4.99078e+06	7.42865e+06	6.7347e+06	6.38471e+06
VIME_HUMAN;AINX_HUMAN;DESM_HUMAN;GFAP_HUMAN;PERI_HUMAN	Vimentin OS=Homo sapiens GN=VIM PE=1 SV=4	41	2000.4	4.24351e+06	1.05744e+07	4.29204e+06	6.36997e+06
BGH3_HUMAN	Transforming growth factor-beta-induced protein ig-h3 OS=Homo sapiens GN=TGFBI PE=1 SV=1	25	1167.75	5.52501e+06	6.11472e+06	5.1557e+06	5.59848e+06
CO3A1_HUMAN	Collagen alpha-1(III) chain OS=Homo sapiens GN=COL3A1 PE=1 SV=4	19	855.62	3.36798e+06	8.08272e+06	5.03873e+06	5.49648e+06
SPRC_HUMAN	SPARC OS=Homo sapiens GN=SPARC PE=1 SV=1	13	543.92	4.69987e+06	6.7462e+06	4.5027e+06	5.31625e+06
MMP1_HUMAN	Interstitial collagenase OS=Homo sapiens GN=MMP1 PE=1 SV=3	29	1487.43	4.69274e+06	5.35324e+06	5.01539e+06	5.02046e+06
PTX3_HUMAN;AN30A_HUMAN	Pentraxin-related protein PTX3 OS=Homo sapiens GN=PTX3 PE=1 SV=3	15	901.14	2.2098e+06	6.09749e+06	3.75216e+06	4.01982e+06
MASP1_HUMAN	Mannan-binding lectin serine protease 1 OS=Homo sapiens GN=MASP1 PE=1 SV=3	7	380.95	1.90425e+06	6.30465e+06	3.2106e+06	3.8065e+06
CO6A3_HUMAN	Collagen alpha-3(VI) chain OS=Homo sapiens GN=COL6A3 PE=1 SV=5	59	2724.17	3.08578e+06	3.94675e+06	3.26332e+06	3.43195e+06
LMNA_HUMAN;LMNB1_HUMAN	Prelamin-A/C OS=Homo sapiens GN=LMNA PE=1 SV=1	37	1803.18	2.48485e+06	4.33021e+06	2.75537e+06	3.19014e+06
COCA1_HUMAN	Collagen alpha-1(XII) chain OS=Homo sapiens GN=COL12A1 PE=1 SV=2	70	3196.23	2.26581e+06	2.86333e+06	3.56944e+06	2.89953e+06
CO6A2_HUMAN	Collagen alpha-2(VI) chain OS=Homo sapiens GN=COL6A2 PE=1 SV=4	23	1091.94	2.56381e+06	3.10704e+06	2.93698e+06	2.86927e+06
ENPL_HUMAN;ENPLL_HUMAN	Endoplasmin OS=Homo sapiens GN=HSP90B1 PE=1 SV=1	23	1121.52	1.32222e+06	4.88022e+06	1.6118e+06	2.60474e+06
ANXA2_HUMAN;AXA2L_HUMAN	Annexin A2 OS=Homo sapiens GN=ANXA2 PE=1 SV=2	13	755.74	2.38745e+06	3.00377e+06	2.41819e+06	2.60314e+06
GRP78_HUMAN	78 kDa glucose-regulated protein OS=Homo sapiens GN=HSPA5 PE=1 SV=2	21	1136.91	1.90198e+06	3.81183e+06	1.89875e+06	2.53752e+06
FLNA_HUMAN;FLNB_HUMAN	Filamin-A OS=Homo sapiens GN=FLNA PE=1 SV=4	44	1872	1.54752e+06	3.5701e+06	1.94521e+06	2.35428e+06
GDN_HUMAN	Glia-derived nexin OS=Homo sapiens GN=SERPINE2 PE=1 SV=1	19	959.15	1.43813e+06	2.77502e+06	1.66682e+06	1.95999e+06
SERPH_HUMAN	Serpin H1 OS=Homo sapiens GN=SERPINH1 PE=1 SV=2	13	611.7	1.80929e+06	2.04354e+06	1.86371e+06	1.90551e+06
KPYM_HUMAN;KPYR_HUMAN	Pyruvate kinase PKM OS=Homo sapiens GN=PKM PE=1 SV=4	18	898.65	1.97439e+06	2.17968e+06	1.41342e+06	1.85583e+06
PEDF_HUMAN	Pigment epithelium-derived factor OS=Homo sapiens GN=SERPINF1 PE=1 SV=4	14	737.18	1.29885e+06	2.45599e+06	1.69967e+06	1.81817e+06
ALBU_HUMAN	Serum albumin OS=Homo sapiens GN=ALB PE=1 SV=2	6	288.15	1.61246e+06	896516	2.68963e+06	1.73287e+06
MMP3_HUMAN	Stromelysin-1 OS=Homo sapiens GN=MMP3 PE=1 SV=2	18	971.32	1.46886e+06	1.79882e+06	1.56421e+06	1.61063e+06
PENK_HUMAN	Proenkephalin-A OS=Homo sapiens GN=PENK PE=1 SV=1	7	366.83	503303	3.1154e+06	1.13112e+06	1.58327e+06
LG3BP_HUMAN	Galectin-3-binding protein OS=Homo sapiens GN=LGALS3BP PE=1 SV=1	13	681.34	1.11929e+06	2.41971e+06	1.13731e+06	1.55877e+06
FETUA_HUMAN	Alpha-2-HS-glycoprotein OS=Homo sapiens GN=AHSG PE=1 SV=1	3	215.83	1.13443e+06	1.57031e+06	1.55327e+06	1.41933e+06
TSP2_HUMAN	Thrombospondin-2 OS=Homo sapiens GN=THBS2 PE=1 SV=2	27	1601.45	1.07741e+06	1.44723e+06	1.72659e+06	1.41708e+06
GELS_HUMAN	Gelsolin OS=Homo sapiens GN=GSN PE=1 SV=1	17	742.45	1.01307e+06	2.33831e+06	891318	1.41423e+06
G3P_HUMAN;G3PT_HUMAN	Glyceraldehyde-3-phosphate dehydrogenase OS=Homo sapiens GN=GAPDH PE=1 SV=3	11	553.01	1.21335e+06	1.55646e+06	1.12293e+06	1.29758e+06
GCSP_HUMAN	Glycine dehydrogenase (decarboxylating), mitochondrial OS=Homo sapiens GN=GLDC PE=1 SV=2	1	22.17	84961.1	3.5408e+06	259863	1.29521e+06
ACTB_HUMAN;ACTBL_HUMAN;ACTBM_HUMAN;POTEE_HUMAN;POTEF_HUMAN;POTEI_HUMAN	Actin, cytoplasmic 1 OS=Homo sapiens GN=ACTB PE=1 SV=1	6	848.99	1.07577e+06	1.29216e+06	1.29731e+06	1.22175e+06
TIMP2_HUMAN	Metalloproteinase inhibitor 2 OS=Homo sapiens GN=TIMP2 PE=1 SV=2	8	361.17	504652	1.57323e+06	621522	899803
LEG1_HUMAN	Galectin-1 OS=Homo sapiens GN=LGALS1 PE=1 SV=2	8	341.81	722202	1.21478e+06	750537	895841
PGBM_HUMAN	Basement membrane-specific heparan sulfate proteoglycan core protein OS=Homo sapiens GN=HSPG2 PE=1 SV=4	22	988.07	736582	1.01781e+06	885994	880128
TKT_HUMAN	Transketolase OS=Homo sapiens GN=TKT PE=1 SV=3	11	465.54	505250	1.66865e+06	452766	875554
OLFL3_HUMAN	Olfactomedin-like protein 3 OS=Homo sapiens GN=OLFML3 PE=2 SV=1	11	506.87	547377	1.10168e+06	968655	872570
LAMB2_HUMAN	Laminin subunit beta-2 OS=Homo sapiens GN=LAMB2 PE=1 SV=2	27	1297.31	508860	1.25753e+06	779570	848655
SRPX_HUMAN	Sushi repeat-containing protein SRPX OS=Homo sapiens GN=SRPX PE=1 SV=1	9	367.24	521376	1.16926e+06	730199	806944
CATB_HUMAN	Cathepsin B OS=Homo sapiens GN=CTSB PE=1 SV=3	14	635.3	544348	1.27308e+06	574568	797332
CALU_HUMAN	Calumenin OS=Homo sapiens GN=CALU PE=1 SV=2	10	409.12	426647	1.23275e+06	650952	770117
HSP7C_HUMAN;HSP72_HUMAN	Heat shock cognate 71 kDa protein OS=Homo sapiens GN=HSPA8 PE=1 SV=1	15	1090.52	716516	853660	624656	731611
ALDOA_HUMAN	Fructose-bisphosphate aldolase A OS=Homo sapiens GN=ALDOA PE=1 SV=2	11	574.38	466204	1.15168e+06	553733	723872
LDHA_HUMAN;LDH6A_HUMAN	L-lactate dehydrogenase A chain OS=Homo sapiens GN=LDHA PE=1 SV=2	10	657.56	537438	917239	653360	702679
CBPE_HUMAN	Carboxypeptidase E OS=Homo sapiens GN=CPE PE=1 SV=1	9	328.11	327286	1.23318e+06	501048	687170
TRFL_HUMAN	Lactotransferrin OS=Homo sapiens GN=LTF PE=1 SV=6	4	150.05	499251	600812	918722	672928
ENOA_HUMAN;ENOB_HUMAN	Alpha-enolase OS=Homo sapiens GN=ENO1 PE=1 SV=2	12	628.78	602929	791681	578542	657717
HS90B_HUMAN;H90B2_HUMAN;H90B3_HUMAN;H90B4_HUMAN;HS904_HUMAN	Heat shock protein HSP 90-beta OS=Homo sapiens GN=HSP90AB1 PE=1 SV=4	12	884.06	474693	949094	549279	657689
MFGM_HUMAN	Lactadherin OS=Homo sapiens GN=MFGE8 PE=1 SV=2	14	834.19	421019	859330	649020	643123
CLUS_HUMAN	Clusterin OS=Homo sapiens GN=CLU PE=1 SV=1	12	578.27	408182	982508	518043	636244
NID2_HUMAN;LRP8_HUMAN	Nidogen-2 OS=Homo sapiens GN=NID2 PE=1 SV=3	17	747.36	376715	833896	669970	626860
CATZ_HUMAN	Cathepsin Z OS=Homo sapiens GN=CTSZ PE=1 SV=1	7	302.45	363696	902575	612607	626293
CSPG2_HUMAN	Versican core protein OS=Homo sapiens GN=VCAN PE=1 SV=3	8	319.28	582779	589738	682582	618367
CO9_HUMAN	Complement component C9 OS=Homo sapiens GN=C9 PE=1 SV=2	2	109.51	536032	518479	761217	605243
PLOD1_HUMAN;ARHGI_HUMAN	Procollagen-lysine,2-oxoglutarate 5-dioxygenase 1 OS=Homo sapiens GN=PLOD1 PE=1 SV=2	7	299.98	478585	780660	550494	603247
PXDN_HUMAN	Peroxidasin homolog OS=Homo sapiens GN=PXDN PE=1 SV=2	15	631.15	427526	736083	568613	577408
TERA_HUMAN;KATL2_HUMAN	Transitional endoplasmic reticulum ATPase OS=Homo sapiens GN=VCP PE=1 SV=4	13	577.69	527510	792426	398273	572736
DKK3_HUMAN	Dickkopf-related protein 3 OS=Homo sapiens GN=DKK3 PE=1 SV=2	4	204.75	496059	726662	434646	552455
PAI1_HUMAN	Plasminogen activator inhibitor 1 OS=Homo sapiens GN=SERPINE1 PE=1 SV=1	6	330.22	417890	758138	459457	545161
LOXL2_HUMAN	Lysyl oxidase homolog 2 OS=Homo sapiens GN=LOXL2 PE=1 SV=1	10	390.12	248162	850740	409270	502724
EF2_HUMAN	Elongation factor 2 OS=Homo sapiens GN=EEF2 PE=1 SV=4	15	579.13	407133	723756	348083	492991
PDIA1_HUMAN	Protein disulfide-isomerase OS=Homo sapiens GN=P4HB PE=1 SV=3	10	526.11	276717	797768	391210	488565
CTHR1_HUMAN	Collagen triple helix repeat-containing protein 1 OS=Homo sapiens GN=CTHRC1 PE=1 SV=1	6	246.26	370021	665112	419875	485003
RF1M_HUMAN	Peptide chain release factor 1, mitochondrial OS=Homo sapiens GN=MTRF1 PE=1 SV=2	1	20.85	299092	1.02485e+06	125380	483107
TPIS_HUMAN	Triosephosphate isomerase OS=Homo sapiens GN=TPI1 PE=1 SV=3	9	413.4	435215	616060	367976	473084
FKB10_HUMAN;CABP7_HUMAN	Peptidyl-prolyl cis-trans isomerase FKBP10 OS=Homo sapiens GN=FKBP10 PE=1 SV=1	9	335.34	348582	745775	305769	466709
B4GT1_HUMAN;B4GT5_HUMAN	Beta-1,4-galactosyltransferase 1 OS=Homo sapiens GN=B4GALT1 PE=1 SV=5	6	208.66	283163	803861	309616	465547
EDIL3_HUMAN	EGF-like repeat and discoidin I-like domain-containing protein 3 OS=Homo sapiens GN=EDIL3 PE=1 SV=1	7	252.74	414818	432881	547386	465028
FSTL1_HUMAN	Follistatin-related protein 1 OS=Homo sapiens GN=FSTL1 PE=1 SV=1	10	453.72	264063	687338	425508	458970
CO5A2_HUMAN;CO2A1_HUMAN	Collagen alpha-2(V) chain OS=Homo sapiens GN=COL5A2 PE=1 SV=3	8	259.89	238392	623610	486801	449601
PDIA3_HUMAN	Protein disulfide-isomerase A3 OS=Homo sapiens GN=PDIA3 PE=1 SV=4	13	543.28	362115	686501	278540	442385
ACTN4_HUMAN;SPTN4_HUMAN	Alpha-actinin-4 OS=Homo sapiens GN=ACTN4 PE=1 SV=2	13	1021.7	150829	885207	266070	434036
NUCL_HUMAN	Nucleolin OS=Homo sapiens GN=NCL PE=1 SV=3	12	490.07	303481	687317	299877	430225
TBB5_HUMAN;TBB1_HUMAN;TBB2B_HUMAN;TBB8L_HUMAN	Tubulin beta chain OS=Homo sapiens GN=TUBB PE=1 SV=2	3	693.63	452459	528628	299147	426745
ACTN1_HUMAN;ACTN3_HUMAN	Alpha-actinin-1 OS=Homo sapiens GN=ACTN1 PE=1 SV=2	8	915.57	160480	838129	251245	416618
PPIB_HUMAN	Peptidyl-prolyl cis-trans isomerase B OS=Homo sapiens GN=PPIB PE=1 SV=2	6	285.99	335085	584073	328905	416021
HS90A_HUMAN;HS902_HUMAN;HS905_HUMAN;XPP3_HUMAN	Heat shock protein HSP 90-alpha OS=Homo sapiens GN=HSP90AA1 PE=1 SV=5	6	623.67	233083	640326	307110	393506
HTRA1_HUMAN	Serine protease HTRA1 OS=Homo sapiens GN=HTRA1 PE=1 SV=1	11	437.8	309439	497152	357034	387875
ANGL2_HUMAN;ANGL1_HUMAN;ANGL6_HUMAN	Angiopoietin-related protein 2 OS=Homo sapiens GN=ANGPTL2 PE=1 SV=1	11	521.1	231924	489969	406428	376107
PLOD3_HUMAN	Procollagen-lysine,2-oxoglutarate 5-dioxygenase 3 OS=Homo sapiens GN=PLOD3 PE=1 SV=1	9	431.76	253773	463702	329218	348898
POF1B_HUMAN	Protein POF1B OS=Homo sapiens GN=POF1B PE=1 SV=3	1	22.84	241017	342435	448489	343980
LAMC1_HUMAN	Laminin subunit gamma-1 OS=Homo sapiens GN=LAMC1 PE=1 SV=3	15	702.19	320776	309479	388741	339665
VASN_HUMAN	Vasorin OS=Homo sapiens GN=VASN PE=1 SV=1	7	392.02	244864	482853	273129	333615
LDHB_HUMAN	L-lactate dehydrogenase B chain OS=Homo sapiens GN=LDHB PE=1 SV=2	6	359.55	241631	452917	274343	322963
SODE_HUMAN	Extracellular superoxide dismutase [Cu-Zn] OS=Homo sapiens GN=SOD3 PE=1 SV=2	7	333.45	135423	511387	321009	322606
PROF1_HUMAN	Profilin-1 OS=Homo sapiens GN=PFN1 PE=1 SV=2	5	217.36	215694	466505	232976	305058
RS27A_HUMAN	Ubiquitin-40S ribosomal protein S27a OS=Homo sapiens GN=RPS27A PE=1 SV=2	3	75.5	207924	477708	228600	304744
CASP2_HUMAN	Caspase-2 OS=Homo sapiens GN=CASP2 PE=1 SV=2	1	21.56	195364	297100	394107	295524
PDIA4_HUMAN	Protein disulfide-isomerase A4 OS=Homo sapiens GN=PDIA4 PE=1 SV=2	10	431.44	189143	435252	254805	293067
TENA_HUMAN	Tenascin OS=Homo sapiens GN=TNC PE=1 SV=3	21	1039.02	283151	195756	360296	279734
CATL1_HUMAN	Cathepsin L1 OS=Homo sapiens GN=CTSL PE=1 SV=2	2	89.63	157143	427607	233066	272605
GPC1_HUMAN	Glypican-1 OS=Homo sapiens GN=GPC1 PE=1 SV=2	7	254.58	151308	311796	354123	272409
AEBP1_HUMAN	Adipocyte enhancer-binding protein 1 OS=Homo sapiens GN=AEBP1 PE=1 SV=1	10	446.23	167093	283464	355867	268808
GAS6_HUMAN	Growth arrest-specific protein 6 OS=Homo sapiens GN=GAS6 PE=1 SV=2	8	404.75	164674	289957	347231	267287
CALR_HUMAN	Calreticulin OS=Homo sapiens GN=CALR PE=1 SV=1	8	392.52	186318	383882	225794	265331
LAMB1_HUMAN	Laminin subunit beta-1 OS=Homo sapiens GN=LAMB1 PE=1 SV=2	10	341.45	172930	357765	258632	263109
FSCN1_HUMAN	Fascin OS=Homo sapiens GN=FSCN1 PE=1 SV=3	10	374.22	212619	363642	209032	261764
FBLN4_HUMAN	EGF-containing fibulin-like extracellular matrix protein 2 OS=Homo sapiens GN=EFEMP2 PE=1 SV=3	4	167.06	207608	221672	350516	259932
CO5A1_HUMAN	Collagen alpha-1(V) chain OS=Homo sapiens GN=COL5A1 PE=1 SV=3	6	190.89	169841	416789	173716	253449
TUT7_HUMAN	Terminal uridylyltransferase 7 OS=Homo sapiens GN=ZCCHC6 PE=1 SV=1	1	61.07	245690	160970	353296	253318
NPTX1_HUMAN	Neuronal pentraxin-1 OS=Homo sapiens GN=NPTX1 PE=2 SV=2	6	257.37	207552	353987	197069	252869
ITIH2_HUMAN	Inter-alpha-trypsin inhibitor heavy chain H2 OS=Homo sapiens GN=ITIH2 PE=1 SV=2	5	201.54	172922	204732	376995	251550
IBP2_HUMAN	Insulin-like growth factor-binding protein 2 OS=Homo sapiens GN=IGFBP2 PE=1 SV=2	7	322.57	206733	240944	305961	251213
POSTN_HUMAN	Periostin OS=Homo sapiens GN=POSTN PE=1 SV=2	15	707.5	268843	281591	198413	249615
STC1_HUMAN	Stanniocalcin-1 OS=Homo sapiens GN=STC1 PE=1 SV=1	2	82.6	197192	276732	269826	247917
IBP4_HUMAN	Insulin-like growth factor-binding protein 4 OS=Homo sapiens GN=IGFBP4 PE=1 SV=2	3	88.77	175686	297976	266474	246712
FBN2_HUMAN	Fibrillin-2 OS=Homo sapiens GN=FBN2 PE=1 SV=3	6	275.79	166485	300404	257451	241447
GDIR1_HUMAN	Rho GDP-dissociation inhibitor 1 OS=Homo sapiens GN=ARHGDIA PE=1 SV=3	2	93.05	180365	329985	184530	231627
EMIL1_HUMAN	EMILIN-1 OS=Homo sapiens GN=EMILIN1 PE=1 SV=3	8	331.32	152605	329730	211310	231215
SYNE2_HUMAN	Nesprin-2 OS=Homo sapiens GN=SYNE2 PE=1 SV=3	1	26.85	133738	349315	209309	230788
GANAB_HUMAN	Neutral alpha-glucosidase AB OS=Homo sapiens GN=GANAB PE=1 SV=3	11	348.3	107331	456918	93176.2	219142
CD14_HUMAN	Monocyte differentiation antigen CD14 OS=Homo sapiens GN=CD14 PE=1 SV=2	5	181.66	197867	249954	206905	218242
UFO_HUMAN	Tyrosine-protein kinase receptor UFO OS=Homo sapiens GN=AXL PE=1 SV=3	3	143.43	213877	256730	176935	215847
HSP74_HUMAN	Heat shock 70 kDa protein 4 OS=Homo sapiens GN=HSPA4 PE=1 SV=4	2	67.84	104461	142892	384475	210609
DAG1_HUMAN	Dystroglycan OS=Homo sapiens GN=DAG1 PE=1 SV=2	3	111.86	276529	189390	153205	206375
MMS19_HUMAN	MMS19 nucleotide excision repair protein homolog OS=Homo sapiens GN=MMS19 PE=1 SV=2	1	22.25	88377.7	338881	186240	204500
FBLN5_HUMAN	Fibulin-5 OS=Homo sapiens GN=FBLN5 PE=1 SV=1	5	224.02	171251	199285	231518	200685
HSPB1_HUMAN	Heat shock protein beta-1 OS=Homo sapiens GN=HSPB1 PE=1 SV=2	7	352.7	167237	322100	110368	199902
PRDX1_HUMAN	Peroxiredoxin-1 OS=Homo sapiens GN=PRDX1 PE=1 SV=1	4	263.23	132312	277400	173137	194283
LTBP1_HUMAN	Latent-transforming growth factor beta-binding protein 1 OS=Homo sapiens GN=LTBP1 PE=1 SV=4	4	171.45	168772	230252	181092	193372
KIF2C_HUMAN	Kinesin-like protein KIF2C OS=Homo sapiens GN=KIF2C PE=1 SV=2	1	21.74	198803	26650.6	337453	187636
SHOC2_HUMAN	Leucine-rich repeat protein SHOC-2 OS=Homo sapiens GN=SHOC2 PE=1 SV=2	1	39.38	321133	162779	76558	186823
PLTP_HUMAN	Phospholipid transfer protein OS=Homo sapiens GN=PLTP PE=1 SV=1	6	262.73	191137	158960	209097	186398
CPXM2_HUMAN	Inactive carboxypeptidase-like protein X2 OS=Homo sapiens GN=CPXM2 PE=2 SV=3	7	330.16	113952	338816	105689	186152
VTNC_HUMAN	Vitronectin OS=Homo sapiens GN=VTN PE=1 SV=1	1	52.83	148151	260643	148563	185786
HMGC2_HUMAN	3-hydroxymethyl-3-methylglutaryl-CoA lyase, cytoplasmic OS=Homo sapiens GN=HMGCLL1 PE=1 SV=3	1	28.09	134807	108768	308287	183954
CD44_HUMAN	CD44 antigen OS=Homo sapiens GN=CD44 PE=1 SV=3	6	287.71	187619	255383	104833	182612
TR11B_HUMAN	Tumor necrosis factor receptor superfamily member 11B OS=Homo sapiens GN=TNFRSF11B PE=1 SV=3	4	168.5	164342	211676	168368	181462
ROA2_HUMAN	Heterogeneous nuclear ribonucleoproteins A2/B1 OS=Homo sapiens GN=HNRNPA2B1 PE=1 SV=2	8	300.51	118086	259613	156755	178152
OVOS1_HUMAN	Ovostatin homolog 1 OS=Homo sapiens GN=OVOS1 PE=2 SV=2	1	22.79	159247	102772	265475	175831
SMRD2_HUMAN	SWI/SNF-related matrix-associated actin-dependent regulator of chromatin subfamily D member 2 OS=Homo sapiens GN=SMARCD2 PE=1 SV=3	1	20.46	92051.7	238353	195123	175176
LUM_HUMAN	Lumican OS=Homo sapiens GN=LUM PE=1 SV=2	7	378.84	153867	210026	155325	173073
MA1A1_HUMAN	Mannosyl-oligosaccharide 1,2-alpha-mannosidase IA OS=Homo sapiens GN=MAN1A1 PE=1 SV=3	5	225.47	155585	160822	202529	172979
IBP5_HUMAN	Insulin-like growth factor-binding protein 5 OS=Homo sapiens GN=IGFBP5 PE=1 SV=1	4	139.86	148164	173346	198122	173211
RAB5C_HUMAN;RAB5A_HUMAN	Ras-related protein Rab-5C OS=Homo sapiens GN=RAB5C PE=1 SV=2	3	171.49	10519.2	494799	10191.2	171836
ENPP2_HUMAN	Ectonucleotide pyrophosphatase/phosphodiesterase family member 2 OS=Homo sapiens GN=ENPP2 PE=1 SV=3	4	157.9	141532	177661	195510	171568
NET1_HUMAN	Netrin-1 OS=Homo sapiens GN=NTN1 PE=1 SV=2	4	156.61	82777.1	246274	174248	167766
LAMA4_HUMAN	Laminin subunit alpha-4 OS=Homo sapiens GN=LAMA4 PE=1 SV=4	12	426.35	166591	120755	205247	164197
BAG2_HUMAN	BAG family molecular chaperone regulator 2 OS=Homo sapiens GN=BAG2 PE=1 SV=1	3	114.92	183625	65624.6	243245	164165
CSTN1_HUMAN	Calsyntenin-1 OS=Homo sapiens GN=CLSTN1 PE=1 SV=1	7	259.54	118479	211649	159018	163048
SODC_HUMAN	Superoxide dismutase [Cu-Zn] OS=Homo sapiens GN=SOD1 PE=1 SV=2	6	252.21	163029	201751	120848	161876
C1QT1_HUMAN	Complement C1q tumor necrosis factor-related protein 1 OS=Homo sapiens GN=C1QTNF1 PE=1 SV=1	1	73.46	101493	261739	114215	159149
IL6_HUMAN	Interleukin-6 OS=Homo sapiens GN=IL6 PE=1 SV=1	3	212.13	65606.2	311458	98273.4	158446
FBN1_HUMAN	Fibrillin-1 OS=Homo sapiens GN=FBN1 PE=1 SV=3	7	286.72	144149	239605	88981.5	157578
MLH1_HUMAN	DNA mismatch repair protein Mlh1 OS=Homo sapiens GN=MLH1 PE=1 SV=1	2	51.11	130467	85883.3	250439	155596
MOES_HUMAN;RADI_HUMAN	Moesin OS=Homo sapiens GN=MSN PE=1 SV=3	5	353.54	111388	165505	184689	153861
GNS_HUMAN	N-acetylglucosamine-6-sulfatase OS=Homo sapiens GN=GNS PE=1 SV=3	5	192.92	125345	219146	114524	153005
P3H1_HUMAN	Prolyl 3-hydroxylase 1 OS=Homo sapiens GN=P3H1 PE=1 SV=2	6	234.89	143716	140272	172607	152198
GRP75_HUMAN	Stress-70 protein, mitochondrial OS=Homo sapiens GN=HSPA9 PE=1 SV=2	12	605.22	136952	261513	57503	151989
GARS_HUMAN	Glycine--tRNA ligase OS=Homo sapiens GN=GARS PE=1 SV=3	5	240.61	375206	23924.9	54124	151085
TGFB1_HUMAN	Transforming growth factor beta-1 OS=Homo sapiens GN=TGFB1 PE=1 SV=2	4	133.14	89331.5	185595	165787	146905
PODN_HUMAN	Podocan OS=Homo sapiens GN=PODN PE=1 SV=2	11	413.55	145894	178635	100395	141641
TSG6_HUMAN	Tumor necrosis factor-inducible gene 6 protein OS=Homo sapiens GN=TNFAIP6 PE=1 SV=2	5	234.22	67429.8	231973	122233	140545
INP4B_HUMAN	Type II inositol 3,4-bisphosphate 4-phosphatase OS=Homo sapiens GN=INPP4B PE=2 SV=4	1	20.95	98654.2	37772.7	282429	139619
PLEC_HUMAN;EPIPL_HUMAN	Plectin OS=Homo sapiens GN=PLEC PE=1 SV=3	18	711	86277.1	216859	115135	139424
SVEP1_HUMAN	Sushi, von Willebrand factor type A, EGF and pentraxin domain-containing protein 1 OS=Homo sapiens GN=SVEP1 PE=1 SV=3	8	321.23	109357	194342	113515	139072
PLOD2_HUMAN	Procollagen-lysine,2-oxoglutarate 5-dioxygenase 2 OS=Homo sapiens GN=PLOD2 PE=1 SV=2	4	221.9	73292.7	243694	94427.1	137138
HEXB_HUMAN	Beta-hexosaminidase subunit beta OS=Homo sapiens GN=HEXB PE=1 SV=3	9	321.58	142135	156762	111937	136945
PDIA6_HUMAN	Protein disulfide-isomerase A6 OS=Homo sapiens GN=PDIA6 PE=1 SV=1	5	350.38	114982	188579	100983	134848
CO8A1_HUMAN	Collagen alpha-1(VIII) chain OS=Homo sapiens GN=COL8A1 PE=1 SV=2	4	143.74	79519.4	239102	76155	131592
ANT3_HUMAN	Antithrombin-III OS=Homo sapiens GN=SERPINC1 PE=1 SV=1	2	120.07	134848	92260.7	167101	131403
CLC11_HUMAN	C-type lectin domain family 11 member A OS=Homo sapiens GN=CLEC11A PE=1 SV=1	5	192.62	102200	122304	169659	131388
PAMR1_HUMAN	Inactive serine protease PAMR1 OS=Homo sapiens GN=PAMR1 PE=1 SV=1	4	153.37	81847.5	200487	106934	129756
AHNK_HUMAN	Neuroblast differentiation-associated protein AHNAK OS=Homo sapiens GN=AHNAK PE=1 SV=2	11	424.78	102251	167415	116593	128753
TGFB2_HUMAN	Transforming growth factor beta-2 OS=Homo sapiens GN=TGFB2 PE=1 SV=1	5	199.97	61504.6	219519	103067	128030
CATK_HUMAN	Cathepsin K OS=Homo sapiens GN=CTSK PE=1 SV=1	6	230.93	90848	173589	115433	126623
SFRP4_HUMAN	Secreted frizzled-related protein 4 OS=Homo sapiens GN=SFRP4 PE=1 SV=2	3	182.56	159002	82108.4	140436	127182
LOXL1_HUMAN	Lysyl oxidase homolog 1 OS=Homo sapiens GN=LOXL1 PE=1 SV=2	6	232.04	97705.4	213696	59483.4	123628
CD166_HUMAN	CD166 antigen OS=Homo sapiens GN=ALCAM PE=1 SV=2	5	203.11	195501	146194	28736.6	123477
GSTP1_HUMAN	Glutathione S-transferase P OS=Homo sapiens GN=GSTP1 PE=1 SV=2	3	149.6	87120.1	152391	130034	123182
6PGD_HUMAN	6-phosphogluconate dehydrogenase, decarboxylating OS=Homo sapiens GN=PGD PE=1 SV=3	7	268.01	69545.6	218576	78887.6	122336
NID1_HUMAN	Nidogen-1 OS=Homo sapiens GN=NID1 PE=1 SV=3	9	331.69	113260	97835.5	153623	121573
NUCB1_HUMAN	Nucleobindin-1 OS=Homo sapiens GN=NUCB1 PE=1 SV=4	5	233.37	83344.4	153253	125610	120736
HNRPK_HUMAN	Heterogeneous nuclear ribonucleoprotein K OS=Homo sapiens GN=HNRNPK PE=1 SV=1	5	247.77	111712	150663	99304.9	120560
MYH9_HUMAN;MYH10_HUMAN;MYH11_HUMAN;MYH14_HUMAN	Myosin-9 OS=Homo sapiens GN=MYH9 PE=1 SV=4	11	520.5	67114.9	231852	52758.3	117242
DYH8_HUMAN	Dynein heavy chain 8, axonemal OS=Homo sapiens GN=DNAH8 PE=1 SV=2	1	26.24	45450.1	248328	57497.9	117092
ANGP1_HUMAN	Angiopoietin-1 OS=Homo sapiens GN=ANGPT1 PE=1 SV=2	3	125.99	66451.2	159031	112050	112511
HEXA_HUMAN	Beta-hexosaminidase subunit alpha OS=Homo sapiens GN=HEXA PE=1 SV=2	9	376.37	111590	120779	101243	111204
PGK1_HUMAN;PGK2_HUMAN	Phosphoglycerate kinase 1 OS=Homo sapiens GN=PGK1 PE=1 SV=3	8	357.75	92710.7	147583	89890.2	110061
MDHM_HUMAN	Malate dehydrogenase, mitochondrial OS=Homo sapiens GN=MDH2 PE=1 SV=3	8	317.65	83629	188430	56035	109365
NPC2_HUMAN	Epididymal secretory protein E1 OS=Homo sapiens GN=NPC2 PE=1 SV=1	3	107.8	86358.7	116760	123388	108835
FNDC1_HUMAN	Fibronectin type III domain-containing protein 1 OS=Homo sapiens GN=FNDC1 PE=2 SV=4	4	203.48	34538.3	212775	77401.6	108238
FBLN2_HUMAN	Fibulin-2 OS=Homo sapiens GN=FBLN2 PE=1 SV=2	10	496.07	110796	50816	162416	108010
FBLN3_HUMAN	EGF-containing fibulin-like extracellular matrix protein 1 OS=Homo sapiens GN=EFEMP1 PE=1 SV=2	9	399.51	127023	78306.5	117432	107587
FST_HUMAN	Follistatin OS=Homo sapiens GN=FST PE=1 SV=2	5	223.39	80230.8	127953	108533	105572
ATPA_HUMAN	ATP synthase subunit alpha, mitochondrial OS=Homo sapiens GN=ATP5A1 PE=1 SV=1	11	444.81	94742.3	141968	77241.2	104651
CALD1_HUMAN	Caldesmon OS=Homo sapiens GN=CALD1 PE=1 SV=3	9	427.41	92300.5	143615	75805	103907
PPIA_HUMAN;PAL4A_HUMAN	Peptidyl-prolyl cis-trans isomerase A OS=Homo sapiens GN=PPIA PE=1 SV=2	7	239.04	62545.6	188535	57513.7	102865
5NTD_HUMAN	5'-nucleotidase OS=Homo sapiens GN=NT5E PE=1 SV=1	7	309.53	102182	117077	86999.7	102086
ROA1_HUMAN;RA1L2_HUMAN	Heterogeneous nuclear ribonucleoprotein A1 OS=Homo sapiens GN=HNRNPA1 PE=1 SV=5	4	178.23	77971.8	158768	67193.4	101311
IMB1_HUMAN	Importin subunit beta-1 OS=Homo sapiens GN=KPNB1 PE=1 SV=2	4	203.71	66562	166194	69439.1	100732
TB182_HUMAN	182 kDa tankyrase-1-binding protein OS=Homo sapiens GN=TNKS1BP1 PE=1 SV=4	2	53.78	150459	22967.3	128686	100704
NPM_HUMAN	Nucleophosmin OS=Homo sapiens GN=NPM1 PE=1 SV=2	5	219.99	76389.7	147761	77183.9	100445
COF1_HUMAN;COF2_HUMAN	Cofilin-1 OS=Homo sapiens GN=CFL1 PE=1 SV=3	3	87.48	90939.6	140484	64935.1	98786.2
LYOX_HUMAN	Protein-lysine 6-oxidase OS=Homo sapiens GN=LOX PE=1 SV=2	5	203.82	71223.5	120934	97097.8	96418.5
CLIC4_HUMAN	Chloride intracellular channel protein 4 OS=Homo sapiens GN=CLIC4 PE=1 SV=4	3	150.63	93323.2	134472	61096.2	96297.3
WNT5A_HUMAN	Protein Wnt-5a OS=Homo sapiens GN=WNT5A PE=1 SV=2	6	334.65	62252.6	109309	112072	94544.6
CC171_HUMAN	Coiled-coil domain-containing protein 171 OS=Homo sapiens GN=CCDC171 PE=2 SV=1	2	54.74	75629.1	117983	85174.5	92928.9
ANXA5_HUMAN	Annexin A5 OS=Homo sapiens GN=ANXA5 PE=1 SV=2	13	522.91	57046.2	134220	87393.9	92886.8
DSG4_HUMAN	Desmoglein-4 OS=Homo sapiens GN=DSG4 PE=1 SV=1	1	21.76	71178.7	27187.8	179431	92599.1
MYL6_HUMAN;MYL6B_HUMAN	Myosin light polypeptide 6 OS=Homo sapiens GN=MYL6 PE=1 SV=2	5	171.55	54652.8	155322	67124.1	92366.4
ECM1_HUMAN	Extracellular matrix protein 1 OS=Homo sapiens GN=ECM1 PE=1 SV=2	5	186.4	92915.5	94183.6	89056.7	92052
MK_HUMAN	Midkine OS=Homo sapiens GN=MDK PE=1 SV=1	2	75.04	43970.2	114830	112218	90339.4
COR1C_HUMAN	Coronin-1C OS=Homo sapiens GN=CORO1C PE=1 SV=1	7	413.1	61969.2	161007	47784.5	90253.5
ANXA1_HUMAN	Annexin A1 OS=Homo sapiens GN=ANXA1 PE=1 SV=2	10	439.04	46794.7	165259	57486.3	89846.8
B3A4_HUMAN	Anion exchange protein 4 OS=Homo sapiens GN=SLC4A9 PE=2 SV=2	1	20.97	155690	5353.43	106615	89219.3
ATPB_HUMAN	ATP synthase subunit beta, mitochondrial OS=Homo sapiens GN=ATP5B PE=1 SV=3	7	361.39	85840.4	112552	67663.1	88685.1
PCBP1_HUMAN;PCBP3_HUMAN	Poly(rC)-binding protein 1 OS=Homo sapiens GN=PCBP1 PE=1 SV=2	3	166.28	85019.6	121157	59212.9	88463.1
MARCS_HUMAN	Myristoylated alanine-rich C-kinase substrate OS=Homo sapiens GN=MARCKS PE=1 SV=4	5	234.89	54871.2	172850	36301.3	88007.6
CYTC_HUMAN	Cystatin-C OS=Homo sapiens GN=CST3 PE=1 SV=1	1	36.52	58203.2	144856	59394.2	87484.3
CD109_HUMAN	CD109 antigen OS=Homo sapiens GN=CD109 PE=1 SV=2	6	257.79	78172	115962	65910	86681.3
HNRH1_HUMAN;HNRH2_HUMAN;HNRPF_HUMAN	Heterogeneous nuclear ribonucleoprotein H OS=Homo sapiens GN=HNRNPH1 PE=1 SV=4	4	177.37	87680.5	110148	61798.8	86542.4
BMP1_HUMAN;TLL2_HUMAN	Bone morphogenetic protein 1 OS=Homo sapiens GN=BMP1 PE=1 SV=2	7	238.41	82367.8	102038	75088	86497.8
CLIC1_HUMAN	Chloride intracellular channel protein 1 OS=Homo sapiens GN=CLIC1 PE=1 SV=4	6	234.47	80464.8	115677	60365.1	85502.3
SC23A_HUMAN;SC23B_HUMAN	Protein transport protein Sec23A OS=Homo sapiens GN=SEC23A PE=1 SV=2	4	139.96	64153.8	90064	102154	85457.2
SRSF1_HUMAN	Serine/arginine-rich splicing factor 1 OS=Homo sapiens GN=SRSF1 PE=1 SV=2	6	211.44	51458.5	123629	79494.1	84860.5
AMD_HUMAN	Peptidyl-glycine alpha-amidating monooxygenase OS=Homo sapiens GN=PAM PE=1 SV=2	5	193.83	57602.3	111896	82503.7	84000.5
ADGB_HUMAN	Androglobin OS=Homo sapiens GN=ADGB PE=2 SV=3	1	24.22	35625.1	147423	65981.1	83009.8
RL23_HUMAN	60S ribosomal protein L23 OS=Homo sapiens GN=RPL23 PE=1 SV=1	1	21.22	39778.2	152492	55184.4	82484.9
RINI_HUMAN	Ribonuclease inhibitor OS=Homo sapiens GN=RNH1 PE=1 SV=2	9	458.13	36694.5	166137	40620.2	81150.6
HBA_HUMAN	Hemoglobin subunit alpha OS=Homo sapiens GN=HBA1 PE=1 SV=2	4	120.19	50942.4	134235	53890.2	79689.3
CATF_HUMAN	Cathepsin F OS=Homo sapiens GN=CTSF PE=1 SV=1	3	128.64	66869.6	107500	64487.3	79619
ACTA_HUMAN	Actin, aortic smooth muscle OS=Homo sapiens GN=ACTA2 PE=1 SV=1	2	634.58	31751	167478	37900.7	79043.3
EF1G_HUMAN	Elongation factor 1-gamma OS=Homo sapiens GN=EEF1G PE=1 SV=3	6	297.33	57801.3	110748	66613.8	78387.7
COEA1_HUMAN	Collagen alpha-1(XIV) chain OS=Homo sapiens GN=COL14A1 PE=1 SV=3	6	234.43	59523.6	87509.4	87794.8	78275.9
PGS1_HUMAN	Biglycan OS=Homo sapiens GN=BGN PE=1 SV=2	5	206.3	35416.4	141760	54036.3	77070.8
PTK7_HUMAN	Inactive tyrosine-protein kinase 7 OS=Homo sapiens GN=PTK7 PE=1 SV=2	3	106.59	57893.3	101543	71601.4	77012.7
B2MG_HUMAN	Beta-2-microglobulin OS=Homo sapiens GN=B2M PE=1 SV=1	2	74.01	77613.3	110437	41858.3	76636.3
FUCO_HUMAN	Tissue alpha-L-fucosidase OS=Homo sapiens GN=FUCA1 PE=1 SV=4	1	78.46	29586.5	107876	90932.6	76131.7
SHPRH_HUMAN	E3 ubiquitin-protein ligase SHPRH OS=Homo sapiens GN=SHPRH PE=1 SV=2	1	52.73	120425	2941.27	104691	76019.1
KS6A6_HUMAN	Ribosomal protein S6 kinase alpha-6 OS=Homo sapiens GN=RPS6KA6 PE=1 SV=1	1	26.59	24009.3	197711	5565.95	75762.2
COGA1_HUMAN	Collagen alpha-1(XVI) chain OS=Homo sapiens GN=COL16A1 PE=1 SV=2	3	87.57	45662.9	126003	54377.5	75347.9
ILF3_HUMAN	Interleukin enhancer-binding factor 3 OS=Homo sapiens GN=ILF3 PE=1 SV=3	5	150.38	39190.9	140182	44466.6	74613.1
PPGB_HUMAN	Lysosomal protective protein OS=Homo sapiens GN=CTSA PE=1 SV=2	5	182.74	60497	86739	72834.5	73356.8
KLH15_HUMAN	Kelch-like protein 15 OS=Homo sapiens GN=KLHL15 PE=1 SV=2	1	23.7	150993	9347.85	58864.6	73068.5
WDR1_HUMAN	WD repeat-containing protein 1 OS=Homo sapiens GN=WDR1 PE=1 SV=4	5	182.4	86410.6	64742	68028.8	73060.5
TBB4B_HUMAN;TBB4A_HUMAN;TBB8_HUMAN	Tubulin beta-4B chain OS=Homo sapiens GN=TUBB4B PE=1 SV=1	2	558.53	58542	88035.7	72445.9	73007.9
CO6_HUMAN	Complement component C6 OS=Homo sapiens GN=C6 PE=1 SV=3	1	43.97	14009.8	192245	12598.6	72951.2
GLU2B_HUMAN	Glucosidase 2 subunit beta OS=Homo sapiens GN=PRKCSH PE=1 SV=2	2	97.18	83983.5	88166.7	45973.4	72707.9
LRP1_HUMAN	Prolow-density lipoprotein receptor-related protein 1 OS=Homo sapiens GN=LRP1 PE=1 SV=2	8	274.68	72812.8	48630.2	89240.1	70227.7
SPON1_HUMAN	Spondin-1 OS=Homo sapiens GN=SPON1 PE=1 SV=2	4	147.01	36851.2	118485	55326.5	70220.9
PCP_HUMAN	Lysosomal Pro-X carboxypeptidase OS=Homo sapiens GN=PRCP PE=1 SV=1	2	57.91	18086.6	162044	24813.2	68314.4
RS4X_HUMAN;RS4Y1_HUMAN;RS4Y2_HUMAN	40S ribosomal protein S4, X isoform OS=Homo sapiens GN=RPS4X PE=1 SV=2	4	194.33	55933.1	56188.9	89987.1	67369.7
IC1_HUMAN	Plasma protease C1 inhibitor OS=Homo sapiens GN=SERPING1 PE=1 SV=2	4	162.27	51604.1	88379	60786	66923
TBX3_HUMAN	T-box transcription factor TBX3 OS=Homo sapiens GN=TBX3 PE=1 SV=4	1	26.21	58440.1	58248.9	82792.8	66493.9
CO5_HUMAN	Complement C5 OS=Homo sapiens GN=C5 PE=1 SV=4	1	60.1	37766.7	93614.8	66214.3	65865.3
GCNT3_HUMAN	Beta-1,3-galactosyl-O-glycosyl-glycoprotein beta-1,6-N-acetylglucosaminyltransferase 3 OS=Homo sapiens GN=GCNT3 PE=2 SV=1	1	23.45	45683.1	55987.4	95151	65607.2
CATD_HUMAN	Cathepsin D OS=Homo sapiens GN=CTSD PE=1 SV=1	6	229.57	41899	94482.4	59189.5	65190.3
FKBP9_HUMAN	Peptidyl-prolyl cis-trans isomerase FKBP9 OS=Homo sapiens GN=FKBP9 PE=1 SV=2	3	86.52	68521.9	68713.5	58161.7	65132.3
TAGL_HUMAN	Transgelin OS=Homo sapiens GN=TAGLN PE=1 SV=4	4	159.85	58255.6	90295	44457.6	64336.1
LTBP2_HUMAN	Latent-transforming growth factor beta-binding protein 2 OS=Homo sapiens GN=LTBP2 PE=1 SV=3	6	234.51	67804.9	59066.6	65611.2	64160.9
AATC_HUMAN	Aspartate aminotransferase, cytoplasmic OS=Homo sapiens GN=GOT1 PE=1 SV=3	2	89.84	40490.3	73926.2	72131.7	62182.7
CAVN1_HUMAN	Caveolae-associated protein 1 OS=Homo sapiens GN=CAVIN1 PE=1 SV=1	4	307.83	40261.4	111255	32730.3	61415.4
UBA1_HUMAN	Ubiquitin-like modifier-activating enzyme 1 OS=Homo sapiens GN=UBA1 PE=1 SV=3	5	274.67	28656.3	130087	20391.9	59711.6
1433F_HUMAN	14-3-3 protein eta OS=Homo sapiens GN=YWHAH PE=1 SV=4	2	145.9	83909.5	17399.4	75586.4	58965.1
TCPG_HUMAN	T-complex protein 1 subunit gamma OS=Homo sapiens GN=CCT3 PE=1 SV=4	6	228.88	55658.2	42271.7	78774.1	58901.3
CBPQ_HUMAN	Carboxypeptidase Q OS=Homo sapiens GN=CPQ PE=1 SV=1	4	173.68	47201.9	80238.7	48142.3	58527.6
UGDH_HUMAN	UDP-glucose 6-dehydrogenase OS=Homo sapiens GN=UGDH PE=1 SV=1	9	316.03	38037.4	100341	36874.7	58417.8
GREM1_HUMAN;GREM2_HUMAN	Gremlin-1 OS=Homo sapiens GN=GREM1 PE=1 SV=1	3	127.13	42306.8	93213.7	39127.5	58216
XRCC6_HUMAN	X-ray repair cross-complementing protein 6 OS=Homo sapiens GN=XRCC6 PE=1 SV=2	4	155	57221.8	71346.8	45964.3	58177.6
ANTR1_HUMAN	Anthrax toxin receptor 1 OS=Homo sapiens GN=ANTXR1 PE=1 SV=2	1	33.83	32577	69751	69662.6	57330.2
CD248_HUMAN	Endosialin OS=Homo sapiens GN=CD248 PE=1 SV=1	3	69.55	29260.8	63396.9	78682.1	57113.3
PRDX6_HUMAN	Peroxiredoxin-6 OS=Homo sapiens GN=PRDX6 PE=1 SV=3	5	210.66	45128.7	91810.7	34273.3	57070.9
NSMA2_HUMAN	Sphingomyelin phosphodiesterase 3 OS=Homo sapiens GN=SMPD3 PE=1 SV=1	1	24.61	75825.2	2725.09	92284.7	56945
DLDH_HUMAN	Dihydrolipoyl dehydrogenase, mitochondrial OS=Homo sapiens GN=DLD PE=1 SV=2	1	48.96	33545.1	129469	5672.29	56228.8
RACK1_HUMAN	Receptor of activated protein C kinase 1 OS=Homo sapiens GN=RACK1 PE=1 SV=3	3	101.93	52205.8	26458.8	88903.6	55856.1
TRY3_HUMAN	Trypsin-3 OS=Homo sapiens GN=PRSS3 PE=1 SV=2	1	61.36	49580.2	28649.9	85221.3	54483.8
FRPD3_HUMAN	FERM and PDZ domain-containing protein 3 OS=Homo sapiens GN=FRMPD3 PE=2 SV=2	1	26.93	81345.2	4472.58	73620.7	53146.1
CSF1_HUMAN	Macrophage colony-stimulating factor 1 OS=Homo sapiens GN=CSF1 PE=1 SV=2	1	28.11	53031.3	66297.6	39958.7	53095.8
STAT1_HUMAN	Signal transducer and activator of transcription 1-alpha/beta OS=Homo sapiens GN=STAT1 PE=1 SV=2	4	157.46	43339.5	85583.9	29956.8	52960.1
CKAP4_HUMAN	Cytoskeleton-associated protein 4 OS=Homo sapiens GN=CKAP4 PE=1 SV=2	8	466.72	48372.8	71419.1	39080.3	52957.4
PEBP1_HUMAN	Phosphatidylethanolamine-binding protein 1 OS=Homo sapiens GN=PEBP1 PE=1 SV=3	3	152.44	31866.3	88554.8	38316.9	52912.7
NEGR1_HUMAN	Neuronal growth regulator 1 OS=Homo sapiens GN=NEGR1 PE=1 SV=3	2	75.62	40286.6	65564.1	52690.2	52846.9
MDHC_HUMAN	Malate dehydrogenase, cytoplasmic OS=Homo sapiens GN=MDH1 PE=1 SV=4	4	146.52	48635.5	59436.6	50081.5	52717.9
CH60_HUMAN	60 kDa heat shock protein, mitochondrial OS=Homo sapiens GN=HSPD1 PE=1 SV=2	8	315.78	54472.6	39137.6	64085	52565.1
RSSA_HUMAN	40S ribosomal protein SA OS=Homo sapiens GN=RPSA PE=1 SV=4	3	126.05	31344.5	58151.5	66638.2	52044.7
CO7_HUMAN	Complement component C7 OS=Homo sapiens GN=C7 PE=1 SV=2	1	23.49	30520.2	94263.7	30406.1	51730
ARP3_HUMAN	Actin-related protein 3 OS=Homo sapiens GN=ACTR3 PE=1 SV=3	3	67.32	33166.3	68842.3	52646.8	51551.8
H2A1B_HUMAN;H2A1A_HUMAN	Histone H2A type 1-B/E OS=Homo sapiens GN=HIST1H2AB PE=1 SV=2	2	53.7	62043.3	47463.4	44391.5	51299.4
SRPX2_HUMAN	Sushi repeat-containing protein SRPX2 OS=Homo sapiens GN=SRPX2 PE=1 SV=1	2	68.43	37807.6	62039.7	53285.8	51044.4
SHRM3_HUMAN	Protein Shroom3 OS=Homo sapiens GN=SHROOM3 PE=1 SV=2	2	61.5	35296.2	49601.7	67430.8	50776.2
THY1_HUMAN	Thy-1 membrane glycoprotein OS=Homo sapiens GN=THY1 PE=1 SV=2	3	166.47	44410.4	46923.1	60101.3	50478.3
CAPZB_HUMAN	F-actin-capping protein subunit beta OS=Homo sapiens GN=CAPZB PE=1 SV=4	3	122.84	40232.2	68128.4	42240.9	50200.5
TPP1_HUMAN	Tripeptidyl-peptidase 1 OS=Homo sapiens GN=TPP1 PE=1 SV=2	4	241.85	47132.6	57937.9	45153	50074.5
CO8B_HUMAN	Complement component C8 beta chain OS=Homo sapiens GN=C8B PE=1 SV=3	1	36.85	37491	49301.9	61413.7	49402.2
PRDX3_HUMAN	Thioredoxin-dependent peroxide reductase, mitochondrial OS=Homo sapiens GN=PRDX3 PE=1 SV=3	4	148.87	43381.9	52136.3	52547.9	49355.4
SODM_HUMAN	Superoxide dismutase [Mn], mitochondrial OS=Homo sapiens GN=SOD2 PE=1 SV=2	4	190.05	49961.7	77255.8	20691.5	49303
RS3_HUMAN	40S ribosomal protein S3 OS=Homo sapiens GN=RPS3 PE=1 SV=2	5	255.58	44562.8	50053.2	53202.9	49273
EF1A1_HUMAN	Elongation factor 1-alpha 1 OS=Homo sapiens GN=EEF1A1 PE=1 SV=1	2	328.88	34366.7	67348.4	45568.9	49094.7
COPB2_HUMAN	Coatomer subunit beta' OS=Homo sapiens GN=COPB2 PE=1 SV=2	4	160.35	36034.5	84665.5	25755.2	48818.4
RENR_HUMAN	Renin receptor OS=Homo sapiens GN=ATP6AP2 PE=1 SV=2	4	137.33	42912.3	43595.2	59782	48763.2
1433T_HUMAN;1433B_HUMAN	14-3-3 protein theta OS=Homo sapiens GN=YWHAQ PE=1 SV=1	5	433.56	26581.3	67700.9	51682.4	48654.9
TBA1B_HUMAN;TBA4A_HUMAN	Tubulin alpha-1B chain OS=Homo sapiens GN=TUBA1B PE=1 SV=1	1	568.26	69037.8	45308.9	31214.6	48520.5
CAPG_HUMAN	Macrophage-capping protein OS=Homo sapiens GN=CAPG PE=1 SV=2	4	166.24	26523.5	84539.2	33843.4	48302
ASAH1_HUMAN	Acid ceramidase OS=Homo sapiens GN=ASAH1 PE=1 SV=5	3	115.3	27766.2	56727.9	60057.7	48184
ACOXL_HUMAN	Acyl-coenzyme A oxidase-like protein OS=Homo sapiens GN=ACOXL PE=2 SV=3	1	28.77	55953	352.779	87119.3	47808.3
TRFE_HUMAN	Serotransferrin OS=Homo sapiens GN=TF PE=1 SV=3	2	43.7	51296.7	8438.52	82642.8	47459.3
IF4A1_HUMAN;IF4A3_HUMAN	Eukaryotic initiation factor 4A-I OS=Homo sapiens GN=EIF4A1 PE=1 SV=1	6	252.14	43021	64513.3	33196.1	46910.1
DPP2_HUMAN	Dipeptidyl peptidase 2 OS=Homo sapiens GN=DPP7 PE=1 SV=3	6	234.1	29483.2	64262.3	44582.2	46109.2
MXRA5_HUMAN	Matrix-remodeling-associated protein 5 OS=Homo sapiens GN=MXRA5 PE=1 SV=3	8	375.64	45375.4	56218.7	35874.9	45823
TRXR1_HUMAN	Thioredoxin reductase 1, cytoplasmic OS=Homo sapiens GN=TXNRD1 PE=1 SV=3	6	198.66	45875	49124.2	42413.7	45804.3
FLNC_HUMAN	Filamin-C OS=Homo sapiens GN=FLNC PE=1 SV=3	9	393.6	39522	57427.6	40280.8	45743.4
RLA0_HUMAN;RLA0L_HUMAN	60S acidic ribosomal protein P0 OS=Homo sapiens GN=RPLP0 PE=1 SV=1	6	269.98	43985.9	58083.6	34974.8	45681.5
TCPQ_HUMAN	T-complex protein 1 subunit theta OS=Homo sapiens GN=CCT8 PE=1 SV=4	4	196.86	56360.9	44381.7	35965.3	45569.3
HBB_HUMAN;HBE_HUMAN;HBG1_HUMAN	Hemoglobin subunit beta OS=Homo sapiens GN=HBB PE=1 SV=2	2	70.81	50672.8	58422	27399.4	45498.1
FMOD_HUMAN	Fibromodulin OS=Homo sapiens GN=FMOD PE=1 SV=2	2	114.69	40317.6	21108.8	74276.7	45234.3
DDAH2_HUMAN	N(G),N(G)-dimethylarginine dimethylaminohydrolase 2 OS=Homo sapiens GN=DDAH2 PE=1 SV=1	2	49.54	53544.1	11084.2	70812.7	45147
GDIB_HUMAN	Rab GDP dissociation inhibitor beta OS=Homo sapiens GN=GDI2 PE=1 SV=2	5	403.02	32275.8	64137.2	38425.6	44946.2
PICAL_HUMAN	Phosphatidylinositol-binding clathrin assembly protein OS=Homo sapiens GN=PICALM PE=1 SV=2	1	31.81	118904	3142.05	11557.5	44534.4
PCDA9_HUMAN	Protocadherin alpha-9 OS=Homo sapiens GN=PCDHA9 PE=2 SV=1	1	24.15	39022.5	16371.6	78167.6	44520.6
4F2_HUMAN	4F2 cell-surface antigen heavy chain OS=Homo sapiens GN=SLC3A2 PE=1 SV=3	5	212.45	46090	51292.7	35588.1	44323.6
TCPE_HUMAN	T-complex protein 1 subunit epsilon OS=Homo sapiens GN=CCT5 PE=1 SV=1	4	166.11	23616.6	67261.2	41397.8	44091.9
FETA_HUMAN	Alpha-fetoprotein OS=Homo sapiens GN=AFP PE=1 SV=1	2	80.93	35648.8	56071.6	39310.4	43676.9
SIAT6_HUMAN	CMP-N-acetylneuraminate-beta-1,4-galactoside alpha-2,3-sialyltransferase OS=Homo sapiens GN=ST3GAL3 PE=1 SV=1	1	22.76	49265.4	52471.5	28844.1	43527
1433Z_HUMAN	14-3-3 protein zeta/delta OS=Homo sapiens GN=YWHAZ PE=1 SV=1	5	354.93	19310	76720.5	33190.7	43073.8
DPYL2_HUMAN	Dihydropyrimidinase-related protein 2 OS=Homo sapiens GN=DPYSL2 PE=1 SV=1	3	174.75	62880.1	25139.8	40550.9	42856.9
MED16_HUMAN	Mediator of RNA polymerase II transcription subunit 16 OS=Homo sapiens GN=MED16 PE=1 SV=2	1	22.41	52183.5	19125.5	57228	42845.7
SCRB2_HUMAN	Lysosome membrane protein 2 OS=Homo sapiens GN=SCARB2 PE=1 SV=2	1	37.89	27194.5	65058.8	36249.7	42834.3
UROK_HUMAN	Urokinase-type plasminogen activator OS=Homo sapiens GN=PLAU PE=1 SV=2	3	103.9	37121.4	47705	43644.1	42823.5
PDC6I_HUMAN	Programmed cell death 6-interacting protein OS=Homo sapiens GN=PDCD6IP PE=1 SV=1	7	339.15	24081.6	74329.1	29223.5	42544.7
TALDO_HUMAN	Transaldolase OS=Homo sapiens GN=TALDO1 PE=1 SV=2	4	140.6	29414.8	66099.8	29869.2	41794.6
CEMIP_HUMAN	Cell migration-inducing and hyaluronan-binding protein OS=Homo sapiens GN=CEMIP PE=1 SV=2	4	174.83	36991.3	52915.5	35355.6	41754.1
HNRPC_HUMAN;HNRC1_HUMAN	Heterogeneous nuclear ribonucleoproteins C1/C2 OS=Homo sapiens GN=HNRNPC PE=1 SV=4	5	230.65	36439.3	62973.6	25749.4	41720.7
TFR1_HUMAN	Transferrin receptor protein 1 OS=Homo sapiens GN=TFRC PE=1 SV=2	7	252.98	41082.6	38126.8	44766.7	41325.3
BICL1_HUMAN	BICD family-like cargo adapter 1 OS=Homo sapiens GN=BICDL1 PE=2 SV=2	1	20.82	34889.9	66527.4	22020.9	41146.1
NPNT_HUMAN	Nephronectin OS=Homo sapiens GN=NPNT PE=2 SV=3	1	23.14	116125	1322.35	5485.08	40977.3
PDGFD_HUMAN	Platelet-derived growth factor D OS=Homo sapiens GN=PDGFD PE=1 SV=1	2	125.39	27838.2	54741.2	40268.7	40949.4
SPON2_HUMAN	Spondin-2 OS=Homo sapiens GN=SPON2 PE=1 SV=3	3	133.89	30176.6	57474	35050.1	40900.2
HNRPU_HUMAN	Heterogeneous nuclear ribonucleoprotein U OS=Homo sapiens GN=HNRNPU PE=1 SV=6	2	118.42	36520.9	66406.2	18629.7	40519
PRGC2_HUMAN	Peroxisome proliferator-activated receptor gamma coactivator 1-beta OS=Homo sapiens GN=PPARGC1B PE=1 SV=2	1	31.74	99794.2	6776.68	14876.5	40482.4
GLCM_HUMAN	Glucosylceramidase OS=Homo sapiens GN=GBA PE=1 SV=3	4	184.77	36943.9	39675.5	43419.7	40013
PSA6_HUMAN	Proteasome subunit alpha type-6 OS=Homo sapiens GN=PSMA6 PE=1 SV=1	2	93.03	27440.2	41615.2	50867.6	39974.3
WTIP_HUMAN	Wilms tumor protein 1-interacting protein OS=Homo sapiens GN=WTIP PE=1 SV=3	1	22.65	2768.52	115980	933.471	39894.1
TAGL2_HUMAN	Transgelin-2 OS=Homo sapiens GN=TAGLN2 PE=1 SV=3	3	95.16	25895.2	53594.9	38769.8	39420
CCBE1_HUMAN	Collagen and calcium-binding EGF domain-containing protein 1 OS=Homo sapiens GN=CCBE1 PE=1 SV=1	2	89.34	34018.2	41729.7	42230.8	39326.2
LOXL3_HUMAN	Lysyl oxidase homolog 3 OS=Homo sapiens GN=LOXL3 PE=1 SV=1	3	140.63	15514.3	67306.4	34595.4	39138.7
IBP6_HUMAN	Insulin-like growth factor-binding protein 6 OS=Homo sapiens GN=IGFBP6 PE=1 SV=1	1	23.59	23060	46059.2	46945.8	38688.3
CAN2_HUMAN	Calpain-2 catalytic subunit OS=Homo sapiens GN=CAPN2 PE=1 SV=6	6	159.78	14374.6	87791.5	11840.7	38002.2
LSAMP_HUMAN	Limbic system-associated membrane protein OS=Homo sapiens GN=LSAMP PE=1 SV=2	1	32.45	59202.7	17697.8	36115.5	37672
VDAC2_HUMAN	Voltage-dependent anion-selective channel protein 2 OS=Homo sapiens GN=VDAC2 PE=1 SV=2	5	172.22	22256.4	50339.4	39827.1	37474.3
HS71L_HUMAN	Heat shock 70 kDa protein 1-like OS=Homo sapiens GN=HSPA1L PE=1 SV=2	1	452.58	52556.8	7390.63	51900	37282.5
LARP1_HUMAN	La-related protein 1 OS=Homo sapiens GN=LARP1 PE=1 SV=2	1	27.26	58185.2	28546.3	25102.5	37278
G6PI_HUMAN;SIX5_HUMAN	Glucose-6-phosphate isomerase OS=Homo sapiens GN=GPI PE=1 SV=4	3	75.61	34046	48861.8	28311	37073
HS71A_HUMAN;HSP77_HUMAN	Heat shock 70 kDa protein 1A OS=Homo sapiens GN=HSPA1A PE=1 SV=1	3	609.04	28035.7	61904.3	21262.6	37067.5
WDR11_HUMAN	WD repeat-containing protein 11 OS=Homo sapiens GN=WDR11 PE=1 SV=1	1	23.76	21815.9	21648.2	67013.3	36825.8
CSRP1_HUMAN	Cysteine and glycine-rich protein 1 OS=Homo sapiens GN=CSRP1 PE=1 SV=3	1	33.92	30388.9	56417.4	22113.9	36306.7
THIO_HUMAN	Thioredoxin OS=Homo sapiens GN=TXN PE=1 SV=3	4	113.21	42370.3	28815.3	37205.7	36130.4
DPYL3_HUMAN;DPYS_HUMAN	Dihydropyrimidinase-related protein 3 OS=Homo sapiens GN=DPYSL3 PE=1 SV=1	4	186.05	51723.6	29926.9	26523.6	36058
SPB6_HUMAN;SPB8_HUMAN	Serpin B6 OS=Homo sapiens GN=SERPINB6 PE=1 SV=3	5	152.6	17454.4	76678.5	13906.7	36013.2
APOA1_HUMAN	Apolipoprotein A-I OS=Homo sapiens GN=APOA1 PE=1 SV=1	1	37.35	76706.5	15970.6	14325.1	35667.4
GNAI2_HUMAN;GNA12_HUMAN;GNAI1_HUMAN	Guanine nucleotide-binding protein G(i) subunit alpha-2 OS=Homo sapiens GN=GNAI2 PE=1 SV=3	5	182.34	23837.3	48971.3	33843	35550.5
NPIA1_HUMAN	Nuclear pore complex-interacting protein family member A1 OS=Homo sapiens GN=NPIPA1 PE=2 SV=3	1	23.96	35011.1	3760.43	67788	35519.8
RL8_HUMAN	60S ribosomal protein L8 OS=Homo sapiens GN=RPL8 PE=1 SV=2	1	32.15	19556.5	60127.4	26135.6	35273.1
NRP1_HUMAN	Neuropilin-1 OS=Homo sapiens GN=NRP1 PE=1 SV=3	1	56.88	17734.8	64426.7	22223.4	34794.9
PSB1_HUMAN	Proteasome subunit beta type-1 OS=Homo sapiens GN=PSMB1 PE=1 SV=2	2	78.41	20081.9	51048.8	32638.6	34589.8
H3C_HUMAN	Histone H3.3C OS=Homo sapiens GN=H3F3C PE=1 SV=3	1	42.69	31073.1	43081.3	28812.8	34322.4
EMD_HUMAN	Emerin OS=Homo sapiens GN=EMD PE=1 SV=1	2	52.93	22442.1	54423.3	25127	33997.5
HPSE_HUMAN	Heparanase OS=Homo sapiens GN=HPSE PE=1 SV=2	1	21.68	41622	29456.4	30296.2	33791.5
ROA3_HUMAN	Heterogeneous nuclear ribonucleoprotein A3 OS=Homo sapiens GN=HNRNPA3 PE=1 SV=2	3	117.07	26611.6	54888.8	18803.9	33434.8
BTD_HUMAN	Biotinidase OS=Homo sapiens GN=BTD PE=1 SV=2	2	99.61	40336.5	36086.6	23361	33261.4
DERM_HUMAN	Dermatopontin OS=Homo sapiens GN=DPT PE=1 SV=2	1	36.83	6967.7	62172.3	29751.2	32963.7
A2MG_HUMAN	Alpha-2-macroglobulin OS=Homo sapiens GN=A2M PE=1 SV=3	2	94.41	23324.9	16610.4	58682.8	32872.7
ECHB_HUMAN	Trifunctional enzyme subunit beta, mitochondrial OS=Homo sapiens GN=HADHB PE=1 SV=3	3	84.28	5494.74	87065	5853.6	32804.4
CAD13_HUMAN	Cadherin-13 OS=Homo sapiens GN=CDH13 PE=1 SV=1	4	164.39	34873.7	35020	28294.6	32729.4
FNBP4_HUMAN	Formin-binding protein 4 OS=Homo sapiens GN=FNBP4 PE=1 SV=3	1	21.03	12826.2	966.556	83479.8	32424.2
H2B1A_HUMAN	Histone H2B type 1-A OS=Homo sapiens GN=HIST1H2BA PE=1 SV=3	1	52.59	33894.2	37005.7	26135.5	32345.1
RASD1_HUMAN	Dexamethasone-induced Ras-related protein 1 OS=Homo sapiens GN=RASD1 PE=1 SV=1	1	24.89	42137.4	2440.87	51945.4	32174.6
NAMPT_HUMAN	Nicotinamide phosphoribosyltransferase OS=Homo sapiens GN=NAMPT PE=1 SV=1	3	125.31	23727.5	46500.8	25979.2	32069.2
CAD11_HUMAN	Cadherin-11 OS=Homo sapiens GN=CDH11 PE=2 SV=2	2	71.65	20685.7	54528.7	20909.7	32041.4
ISLR_HUMAN	Immunoglobulin superfamily containing leucine-rich repeat protein OS=Homo sapiens GN=ISLR PE=2 SV=1	2	84.53	5591.35	83552.4	5993.04	31712.3
MVD1_HUMAN	Diphosphomevalonate decarboxylase OS=Homo sapiens GN=MVD PE=1 SV=1	1	20.85	60134.4	10506.3	24311.1	31650.6
LYAG_HUMAN	Lysosomal alpha-glucosidase OS=Homo sapiens GN=GAA PE=1 SV=4	2	111.63	7598.21	56634	30340.6	31524.3
OSBL7_HUMAN	Oxysterol-binding protein-related protein 7 OS=Homo sapiens GN=OSBPL7 PE=1 SV=1	1	23.12	18899.3	64111.6	11231.5	31414.1
PCDGF_HUMAN	Protocadherin gamma-B3 OS=Homo sapiens GN=PCDHGB3 PE=1 SV=4	1	29.92	17955.8	36915.9	39167.2	31346.3
PKHA6_HUMAN	Pleckstrin homology domain-containing family A member 6 OS=Homo sapiens GN=PLEKHA6 PE=1 SV=4	1	22.76	18887.6	21106.7	53958.6	31317.6
SEC13_HUMAN	Protein SEC13 homolog OS=Homo sapiens GN=SEC13 PE=1 SV=3	1	47.92	4453.29	85138.7	3593.35	31061.8
SFPQ_HUMAN;NONO_HUMAN	Splicing factor, proline- and glutamine-rich OS=Homo sapiens GN=SFPQ PE=1 SV=2	2	110.7	25770.4	52342.1	14532	30881.5
FUBP1_HUMAN	Far upstream element-binding protein 1 OS=Homo sapiens GN=FUBP1 PE=1 SV=3	2	94.04	32458.8	37769.4	22160.4	30796.2
MVP_HUMAN	Major vault protein OS=Homo sapiens GN=MVP PE=1 SV=4	2	99.77	13401.2	71071.7	6958.71	30477.2
VPS35_HUMAN	Vacuolar protein sorting-associated protein 35 OS=Homo sapiens GN=VPS35 PE=1 SV=2	5	206.91	41935.2	25256.6	24226	30472.6
PAI2_HUMAN	Plasminogen activator inhibitor 2 OS=Homo sapiens GN=SERPINB2 PE=1 SV=2	3	104.98	28208.9	32043.5	30850	30367.5
A2AP_HUMAN	Alpha-2-antiplasmin OS=Homo sapiens GN=SERPINF2 PE=1 SV=3	1	53.29	20306.9	45907.2	24781	30331.7
CALX_HUMAN	Calnexin OS=Homo sapiens GN=CANX PE=1 SV=2	4	142.68	30828.3	24071.4	35527.8	30142.5
DTNB_HUMAN	Dystrobrevin beta OS=Homo sapiens GN=DTNB PE=1 SV=1	1	20.65	89350.4	67.927	688.897	30035.8
RTN4_HUMAN	Reticulon-4 OS=Homo sapiens GN=RTN4 PE=1 SV=2	3	98.73	16108.3	44766.2	29008.4	29961
A4_HUMAN	Amyloid-beta A4 protein OS=Homo sapiens GN=APP PE=1 SV=3	3	134.8	13960.1	49068.6	26589.3	29872.7
ARC1B_HUMAN	Actin-related protein 2/3 complex subunit 1B OS=Homo sapiens GN=ARPC1B PE=1 SV=3	4	164.12	20774.8	35587	32531.1	29631
MX1_HUMAN;MX2_HUMAN	Interferon-induced GTP-binding protein Mx1 OS=Homo sapiens GN=MX1 PE=1 SV=4	3	103.39	12006.4	48877.1	27634.2	29505.9
NUCKS_HUMAN	Nuclear ubiquitous casein and cyclin-dependent kinase substrate 1 OS=Homo sapiens GN=NUCKS1 PE=1 SV=1	1	54.89	30149.5	25118.3	32547.3	29271.7
TCPA_HUMAN	T-complex protein 1 subunit alpha OS=Homo sapiens GN=TCP1 PE=1 SV=1	4	186.04	27139.4	23335	36715.7	29063.4
PSA3_HUMAN	Proteasome subunit alpha type-3 OS=Homo sapiens GN=PSMA3 PE=1 SV=2	3	103.08	52910.3	14654.7	19443.6	29002.8
GLGB_HUMAN	1,4-alpha-glucan-branching enzyme OS=Homo sapiens GN=GBE1 PE=1 SV=3	4	134.7	25519.5	39539.7	21463.5	28840.9
KALRN_HUMAN	Kalirin OS=Homo sapiens GN=KALRN PE=1 SV=2	1	23.31	8826.45	54025.1	22581	28477.5
DNS2A_HUMAN	Deoxyribonuclease-2-alpha OS=Homo sapiens GN=DNASE2 PE=1 SV=2	1	49.07	19269.5	37316	28776.9	28454.1
CADH6_HUMAN	Cadherin-6 OS=Homo sapiens GN=CDH6 PE=1 SV=1	4	151.92	22925.1	35990.2	26419.1	28444.8
TPA_HUMAN	Tissue-type plasminogen activator OS=Homo sapiens GN=PLAT PE=1 SV=1	1	35.26	25356.6	17269.1	42601.9	28409.2
PSB3_HUMAN	Proteasome subunit beta type-3 OS=Homo sapiens GN=PSMB3 PE=1 SV=2	2	74.38	21053.7	47586.3	16312.2	28317.4
DCD_HUMAN	Dermcidin OS=Homo sapiens GN=DCD PE=1 SV=2	1	29.29	37074.8	32753.5	14242.8	28023.7
CAB45_HUMAN	45 kDa calcium-binding protein OS=Homo sapiens GN=SDF4 PE=1 SV=1	2	109.06	15564.6	42486	25781.8	27944.2
MOT10_HUMAN	Monocarboxylate transporter 10 OS=Homo sapiens GN=SLC16A10 PE=1 SV=1	1	26.58	41846.5	2180.78	39749.7	27925.7
ZN550_HUMAN	Zinc finger protein 550 OS=Homo sapiens GN=ZNF550 PE=1 SV=2	2	64.69	24578.3	23104.5	35993.4	27892.1
ECHA_HUMAN	Trifunctional enzyme subunit alpha, mitochondrial OS=Homo sapiens GN=HADHA PE=1 SV=2	5	158.9	24867.7	15341.1	41276	27161.6
PGM1_HUMAN	Phosphoglucomutase-1 OS=Homo sapiens GN=PGM1 PE=1 SV=3	3	73.58	10053.1	66926.4	3890.57	26956.7
NB5R3_HUMAN	NADH-cytochrome b5 reductase 3 OS=Homo sapiens GN=CYB5R3 PE=1 SV=3	4	167.9	12764.3	56350.9	8600.27	25905.2
NUP50_HUMAN	Nuclear pore complex protein Nup50 OS=Homo sapiens GN=NUP50 PE=1 SV=2	1	25.44	13297.6	48176.6	15687.3	25720.5
MEP1A_HUMAN	Meprin A subunit alpha OS=Homo sapiens GN=MEP1A PE=1 SV=2	1	23.53	10396	47578.6	18186.1	25386.9
NIBL1_HUMAN	Niban-like protein 1 OS=Homo sapiens GN=FAM129B PE=1 SV=3	3	117.96	23559.6	25286.1	26428.9	25091.5
TARA_HUMAN	TRIO and F-actin-binding protein OS=Homo sapiens GN=TRIOBP PE=1 SV=3	1	22.37	20989.6	10707.6	43031.1	24909.4
SEM3B_HUMAN	Semaphorin-3B OS=Homo sapiens GN=SEMA3B PE=2 SV=1	1	67.21	8886.46	50430.6	15153.6	24823.6
SET_HUMAN;SETLP_HUMAN	Protein SET OS=Homo sapiens GN=SET PE=1 SV=3	2	114.46	20435.2	27272.7	26659.7	24789.2
SPHM_HUMAN	N-sulphoglucosamine sulphohydrolase OS=Homo sapiens GN=SGSH PE=1 SV=1	2	111.76	25011.5	26158.7	23090	24753.4
MGAT1_HUMAN	Alpha-1,3-mannosyl-glycoprotein 2-beta-N-acetylglucosaminyltransferase OS=Homo sapiens GN=MGAT1 PE=1 SV=2	1	25.59	18056	27566.5	28576.6	24733.1
AAPK1_HUMAN	5'-AMP-activated protein kinase catalytic subunit alpha-1 OS=Homo sapiens GN=PRKAA1 PE=1 SV=4	1	20.21	25417.5	1372.01	47040.7	24610
RS8_HUMAN	40S ribosomal protein S8 OS=Homo sapiens GN=RPS8 PE=1 SV=2	3	142.42	29377	25443.2	18379	24399.7
NP1L1_HUMAN	Nucleosome assembly protein 1-like 1 OS=Homo sapiens GN=NAP1L1 PE=1 SV=1	1	35.65	22065.1	40699	10105.9	24290
PTGDS_HUMAN	Prostaglandin-H2 D-isomerase OS=Homo sapiens GN=PTGDS PE=1 SV=1	2	95.62	17564	34692.8	20126.8	24127.9
SFRP1_HUMAN	Secreted frizzled-related protein 1 OS=Homo sapiens GN=SFRP1 PE=1 SV=1	3	85	5251.27	52888.4	14120.7	24086.8
RAP1A_HUMAN;RP1BL_HUMAN	Ras-related protein Rap-1A OS=Homo sapiens GN=RAP1A PE=1 SV=1	3	96.48	9861.78	46066.7	16248.3	24058.9
YD022_HUMAN	Putative uncharacterized protein FLJ45721 OS=Homo sapiens PE=5 SV=2	1	28.86	12337.9	39625.7	19966.4	23976.7
RCN1_HUMAN	Reticulocalbin-1 OS=Homo sapiens GN=RCN1 PE=1 SV=1	2	106.49	19265.8	25882.7	26511.9	23886.8
ZC3H3_HUMAN	Zinc finger CCCH domain-containing protein 3 OS=Homo sapiens GN=ZC3H3 PE=1 SV=3	1	25.55	37134.2	283.006	33986	23801.1
SRCRM_HUMAN	Scavenger receptor cysteine-rich domain-containing protein SCART1 OS=Homo sapiens PE=1 SV=2	1	22.87	17496.6	230.768	53341.1	23689.5
MYDGF_HUMAN	Myeloid-derived growth factor OS=Homo sapiens GN=MYDGF PE=1 SV=1	1	22.65	15558.6	40043.5	14949.2	23517.1
N42L2_HUMAN	NEDD4-binding protein 2-like 2 OS=Homo sapiens GN=N4BP2L2 PE=1 SV=1	1	32.99	18429.8	15486	36457.5	23457.8
AMPL_HUMAN	Cytosol aminopeptidase OS=Homo sapiens GN=LAP3 PE=1 SV=3	1	41.08	29920.2	13643.1	26694.9	23419.4
VAT1_HUMAN	Synaptic vesicle membrane protein VAT-1 homolog OS=Homo sapiens GN=VAT1 PE=1 SV=2	1	23.29	19219.9	39025.9	11154.5	23133.4
DSCAM_HUMAN	Down syndrome cell adhesion molecule OS=Homo sapiens GN=DSCAM PE=1 SV=2	1	34.36	66500.4	1809.17	659.417	22989.7
PRDX2_HUMAN	Peroxiredoxin-2 OS=Homo sapiens GN=PRDX2 PE=1 SV=5	4	195.8	18126.2	26163.4	23016.5	22435.3
TLN1_HUMAN	Talin-1 OS=Homo sapiens GN=TLN1 PE=1 SV=3	6	227.77	16551.9	27570.3	23091.7	22404.7
SCRIB_HUMAN	Protein scribble homolog OS=Homo sapiens GN=SCRIB PE=1 SV=4	1	50.87	31975.1	9204.92	25268.6	22149.5
ATS1_HUMAN	A disintegrin and metalloproteinase with thrombospondin motifs 1 OS=Homo sapiens GN=ADAMTS1 PE=1 SV=4	1	66.13	16014.9	8527.19	41799.3	22113.8
NTNG2_HUMAN	Netrin-G2 OS=Homo sapiens GN=NTNG2 PE=1 SV=2	1	24.98	22126	9957.26	34116.9	22066.7
CLH1_HUMAN;CLH2_HUMAN	Clathrin heavy chain 1 OS=Homo sapiens GN=CLTC PE=1 SV=5	3	151.92	18105.1	28691.1	19239.5	22011.9
HNRPD_HUMAN;ROAA_HUMAN	Heterogeneous nuclear ribonucleoprotein D0 OS=Homo sapiens GN=HNRNPD PE=1 SV=1	3	189.66	19192.1	31528.2	15009.6	21910
PSB5_HUMAN	Proteasome subunit beta type-5 OS=Homo sapiens GN=PSMB5 PE=1 SV=3	2	58.8	9105.67	39869.2	16735.3	21903.4
RAB1B_HUMAN;RAB1A_HUMAN;RAB1C_HUMAN	Ras-related protein Rab-1B OS=Homo sapiens GN=RAB1B PE=1 SV=1	3	137.73	14253.9	37705.6	13554.2	21837.9
FUBP2_HUMAN;FUBP3_HUMAN	Far upstream element-binding protein 2 OS=Homo sapiens GN=KHSRP PE=1 SV=4	3	129.28	25593	27623.8	11583	21599.9
RL15_HUMAN	60S ribosomal protein L15 OS=Homo sapiens GN=RPL15 PE=1 SV=2	1	36.53	7226.56	47217.2	9849.38	21431
ZBTB4_HUMAN	Zinc finger and BTB domain-containing protein 4 OS=Homo sapiens GN=ZBTB4 PE=1 SV=3	1	20.02	8334.25	7196.42	48741.5	21424
IQGA1_HUMAN	Ras GTPase-activating-like protein IQGAP1 OS=Homo sapiens GN=IQGAP1 PE=1 SV=1	4	188.34	14806.5	35288.3	14089.1	21394.6
TCPH_HUMAN	T-complex protein 1 subunit eta OS=Homo sapiens GN=CCT7 PE=1 SV=2	5	192.58	20382	14806.6	28980.1	21389.6
NDKB_HUMAN;NDK8_HUMAN	Nucleoside diphosphate kinase B OS=Homo sapiens GN=NME2 PE=1 SV=1	1	54.19	23964.4	25278.5	14530.9	21257.9
TLS1_HUMAN	Telomere length and silencing protein 1 homolog OS=Homo sapiens GN=C9orf78 PE=1 SV=1	1	22.43	14196.2	25315.1	23896.9	21136.1
COL12_HUMAN	Collectin-12 OS=Homo sapiens GN=COLEC12 PE=1 SV=3	2	74.03	24095	10073.7	28888	21018.9
ZN781_HUMAN	Zinc finger protein 781 OS=Homo sapiens GN=ZNF781 PE=2 SV=1	1	22.44	13750.9	12275.2	35883.3	20636.4
EGLN_HUMAN	Endoglin OS=Homo sapiens GN=ENG PE=1 SV=2	2	82.84	17165.6	31783.9	12196.2	20381.9
PTN_HUMAN	Pleiotrophin OS=Homo sapiens GN=PTN PE=1 SV=1	2	54.21	15533	33454	12081.9	20356.3
TGBR3_HUMAN	Transforming growth factor beta receptor type 3 OS=Homo sapiens GN=TGFBR3 PE=1 SV=3	3	153.58	15672.2	19951	25335.8	20319.7
PEPD_HUMAN	Xaa-Pro dipeptidase OS=Homo sapiens GN=PEPD PE=1 SV=3	6	250.08	8508.15	31093.7	20771.9	20124.6
ERAP1_HUMAN	Endoplasmic reticulum aminopeptidase 1 OS=Homo sapiens GN=ERAP1 PE=1 SV=3	1	47.31	6929.97	42446.1	10343.3	19906.4
TGM2_HUMAN	Protein-glutamine gamma-glutamyltransferase 2 OS=Homo sapiens GN=TGM2 PE=1 SV=2	4	156.99	18319.7	23136.7	18210	19888.8
KCD12_HUMAN;KCD16_HUMAN;KCTD8_HUMAN	BTB/POZ domain-containing protein KCTD12 OS=Homo sapiens GN=KCTD12 PE=1 SV=1	5	174.68	17159.1	24850.4	17483.5	19831
CALM1_HUMAN;CALL3_HUMAN	Calmodulin-1 OS=Homo sapiens GN=CALM1 PE=1 SV=1	2	53.3	11123.2	35210	12584.3	19639.2
ESPL1_HUMAN	Separin OS=Homo sapiens GN=ESPL1 PE=1 SV=3	1	23.44	19316	28215.9	11087.3	19539.7
SC31A_HUMAN	Protein transport protein Sec31A OS=Homo sapiens GN=SEC31A PE=1 SV=3	1	47.58	25445.5	21421.8	11751.4	19539.6
EHD2_HUMAN	EH domain-containing protein 2 OS=Homo sapiens GN=EHD2 PE=1 SV=2	3	117.71	18872.4	25477.3	14052.4	19467.4
MAMC2_HUMAN	MAM domain-containing protein 2 OS=Homo sapiens GN=MAMDC2 PE=2 SV=3	8	318.63	15502	28083.6	14304.4	19296.7
GRM1C_HUMAN	GRAM domain-containing protein 1C OS=Homo sapiens GN=GRAMD1C PE=1 SV=2	1	20.84	19114.7	13055.3	25198.4	19122.8
PTPRK_HUMAN	Receptor-type tyrosine-protein phosphatase kappa OS=Homo sapiens GN=PTPRK PE=1 SV=2	2	93.35	14846.1	32201.7	9945.38	18997.7
DNJA2_HUMAN	DnaJ homolog subfamily A member 2 OS=Homo sapiens GN=DNAJA2 PE=1 SV=1	1	45.54	16426.9	27091.5	12722.5	18747
UGPA_HUMAN	UTP--glucose-1-phosphate uridylyltransferase OS=Homo sapiens GN=UGP2 PE=1 SV=5	2	105.5	14652.8	28495.7	13022	18723.5
HPLN1_HUMAN;HPLN3_HUMAN	Hyaluronan and proteoglycan link protein 1 OS=Homo sapiens GN=HAPLN1 PE=2 SV=2	3	105.51	15374.3	21920.3	18767.5	18687.4
UBP24_HUMAN	Ubiquitin carboxyl-terminal hydrolase 24 OS=Homo sapiens GN=USP24 PE=1 SV=3	1	20.04	11959.8	16461.8	26750.2	18390.6
RL11_HUMAN	60S ribosomal protein L11 OS=Homo sapiens GN=RPL11 PE=1 SV=2	1	51.73	17629.2	26206.4	10901.9	18245.8
SERC_HUMAN	Phosphoserine aminotransferase OS=Homo sapiens GN=PSAT1 PE=1 SV=2	5	216.63	12810.4	23410.2	17666.2	17962.2
STOM_HUMAN;STML3_HUMAN	Erythrocyte band 7 integral membrane protein OS=Homo sapiens GN=STOM PE=1 SV=3	3	124.96	15171.1	19160.5	19534.9	17955.5
PSMD2_HUMAN	26S proteasome non-ATPase regulatory subunit 2 OS=Homo sapiens GN=PSMD2 PE=1 SV=3	3	159.6	13519.5	26582.6	13393	17831.7
TAF3_HUMAN	Transcription initiation factor TFIID subunit 3 OS=Homo sapiens GN=TAF3 PE=1 SV=1	1	23.58	24482.2	1813.13	26927	17740.8
MRC2_HUMAN	C-type mannose receptor 2 OS=Homo sapiens GN=MRC2 PE=1 SV=2	4	132.46	11758.7	19752.8	21530.2	17680.6
ZN638_HUMAN	Zinc finger protein 638 OS=Homo sapiens GN=ZNF638 PE=1 SV=2	1	45.07	9927.66	19517.3	23271.2	17572.1
SIK1_HUMAN	Serine/threonine-protein kinase SIK1 OS=Homo sapiens GN=SIK1 PE=1 SV=2	1	21.47	9894.19	29971.4	12741.1	17535.6
CBR1_HUMAN;CBR3_HUMAN	Carbonyl reductase [NADPH] 1 OS=Homo sapiens GN=CBR1 PE=1 SV=3	6	206.94	13377.6	25798.4	13155.1	17443.7
RAB14_HUMAN	Ras-related protein Rab-14 OS=Homo sapiens GN=RAB14 PE=1 SV=4	2	78.64	9888.98	24157.5	18003.7	17350.1
MED22_HUMAN	Mediator of RNA polymerase II transcription subunit 22 OS=Homo sapiens GN=MED22 PE=1 SV=2	1	21.38	26165.6	1579.88	24160.6	17302
CUTA_HUMAN	Protein CutA OS=Homo sapiens GN=CUTA PE=1 SV=2	1	22.12	19892.2	22236.8	9502.23	17210.4
DX39A_HUMAN	ATP-dependent RNA helicase DDX39A OS=Homo sapiens GN=DDX39A PE=1 SV=2	2	79.87	15806.1	19393.6	16160.8	17120.2
VINC_HUMAN	Vinculin OS=Homo sapiens GN=VCL PE=1 SV=4	4	156.68	17122.2	15929.8	18276.6	17109.6
COR1B_HUMAN	Coronin-1B OS=Homo sapiens GN=CORO1B PE=1 SV=1	4	123.28	10970.2	31443	8782.7	17065.3
ILF2_HUMAN	Interleukin enhancer-binding factor 2 OS=Homo sapiens GN=ILF2 PE=1 SV=2	2	102.93	15560.9	19103.9	16418.5	17027.8
SPAG7_HUMAN	Sperm-associated antigen 7 OS=Homo sapiens GN=SPAG7 PE=1 SV=2	1	28.9	28546.1	5688.7	16740.7	16991.8
MFAP2_HUMAN	Microfibrillar-associated protein 2 OS=Homo sapiens GN=MFAP2 PE=2 SV=1	2	45.46	18913.2	3620.96	28091.7	16875.3
1433G_HUMAN	14-3-3 protein gamma OS=Homo sapiens GN=YWHAG PE=1 SV=2	2	159.59	18289.3	15448.7	16825.2	16854.4
ATX2L_HUMAN	Ataxin-2-like protein OS=Homo sapiens GN=ATXN2L PE=1 SV=2	1	23.24	48669.9	381.183	1453.33	16834.8
PPIC_HUMAN	Peptidyl-prolyl cis-trans isomerase C OS=Homo sapiens GN=PPIC PE=1 SV=1	3	97.62	12055.6	25790.4	12328.9	16725
RAN_HUMAN	GTP-binding nuclear protein Ran OS=Homo sapiens GN=RAN PE=1 SV=3	1	32.37	13702.6	27354.1	8624.38	16560.3
GPNMB_HUMAN	Transmembrane glycoprotein NMB OS=Homo sapiens GN=GPNMB PE=1 SV=2	2	100.07	18779	16396.8	13829.6	16335.1
COFA1_HUMAN	Collagen alpha-1(XV) chain OS=Homo sapiens GN=COL15A1 PE=1 SV=2	4	164.7	7431.26	40181.9	1381.11	16331.4
CAP1_HUMAN;CAP2_HUMAN	Adenylyl cyclase-associated protein 1 OS=Homo sapiens GN=CAP1 PE=1 SV=5	5	198.25	9020.82	25806.6	13860.1	16229.2
MYPN_HUMAN	Myopalladin OS=Homo sapiens GN=MYPN PE=1 SV=2	1	21.84	6121.83	35920.8	6520.58	16187.7
ATG2A_HUMAN	Autophagy-related protein 2 homolog A OS=Homo sapiens GN=ATG2A PE=1 SV=3	1	30.8	23267.3	0	25104	16123.8
ANXA6_HUMAN	Annexin A6 OS=Homo sapiens GN=ANXA6 PE=1 SV=3	10	395.32	10654.3	27314.8	10346.7	16105.3
SERA_HUMAN	D-3-phosphoglycerate dehydrogenase OS=Homo sapiens GN=PHGDH PE=1 SV=4	5	237.24	17450.5	15573.5	14726.9	15916.9
DEST_HUMAN	Destrin OS=Homo sapiens GN=DSTN PE=1 SV=3	1	43.39	13842.9	22579.7	11065.3	15829.3
CD244_HUMAN	Natural killer cell receptor 2B4 OS=Homo sapiens GN=CD244 PE=1 SV=2	1	24.86	9547.18	23425.3	14505.5	15826
NTRI_HUMAN;OPCM_HUMAN	Neurotrimin OS=Homo sapiens GN=NTM PE=1 SV=1	2	57.59	19397.4	18451.5	9515.38	15788.1
NSD1_HUMAN	Histone-lysine N-methyltransferase, H3 lysine-36 and H4 lysine-20 specific OS=Homo sapiens GN=NSD1 PE=1 SV=1	1	20.79	23159.9	1978.22	22005.5	15714.5
SEP11_HUMAN	Septin-11 OS=Homo sapiens GN=SEPT11 PE=1 SV=3	1	59.87	4552.72	32920.8	9045.95	15506.5
HNRPQ_HUMAN	Heterogeneous nuclear ribonucleoprotein Q OS=Homo sapiens GN=SYNCRIP PE=1 SV=2	2	136.76	20568	16045	9893.27	15502.1
IGL1_HUMAN	Immunoglobulin lambda-1 light chain OS=Homo sapiens PE=1 SV=1	1	22.69	14076.7	21214.6	11042.2	15444.5
TXND5_HUMAN	Thioredoxin domain-containing protein 5 OS=Homo sapiens GN=TXNDC5 PE=1 SV=2	4	111.69	14268.5	25358.6	6642.54	15423.2
CO2_HUMAN	Complement C2 OS=Homo sapiens GN=C2 PE=1 SV=2	3	92.08	15693.7	16004.8	14473.9	15390.8
RS14_HUMAN	40S ribosomal protein S14 OS=Homo sapiens GN=RPS14 PE=1 SV=3	1	47.08	3445.75	31259.8	11193.3	15299.6
PGFRL_HUMAN	Platelet-derived growth factor receptor-like protein OS=Homo sapiens GN=PDGFRL PE=1 SV=1	2	61.26	8671.66	18379.3	18608.5	15219.8
PLST_HUMAN;PLSI_HUMAN;PLSL_HUMAN	Plastin-3 OS=Homo sapiens GN=PLS3 PE=1 SV=4	7	209.44	18196	14328.1	12861.2	15128.4
VGFR1_HUMAN	Vascular endothelial growth factor receptor 1 OS=Homo sapiens GN=FLT1 PE=1 SV=2	1	28.49	13941.3	14429.2	17006.9	15125.8
TR19L_HUMAN	Tumor necrosis factor receptor superfamily member 19L OS=Homo sapiens GN=RELT PE=1 SV=1	1	22.7	13309.5	4539.53	27348.6	15065.9
B4GA1_HUMAN	Beta-1,4-glucuronyltransferase 1 OS=Homo sapiens GN=B4GAT1 PE=1 SV=1	2	59.15	6409.58	23810.1	14682.5	14967.4
LMAN2_HUMAN	Vesicular integral-membrane protein VIP36 OS=Homo sapiens GN=LMAN2 PE=1 SV=1	3	98.09	6152.52	14416.6	23828.8	14799.3
EF1D_HUMAN	Elongation factor 1-delta OS=Homo sapiens GN=EEF1D PE=1 SV=5	3	126.56	6808.35	23448.9	13422.7	14560
TCPD_HUMAN	T-complex protein 1 subunit delta OS=Homo sapiens GN=CCT4 PE=1 SV=4	4	111.75	6311.72	20961.3	16375.4	14549.5
PRS7_HUMAN	26S proteasome regulatory subunit 7 OS=Homo sapiens GN=PSMC2 PE=1 SV=3	2	149.08	8987.3	23105.2	11259.1	14450.5
CDC42_HUMAN	Cell division control protein 42 homolog OS=Homo sapiens GN=CDC42 PE=1 SV=2	2	76.91	6386.41	27727.6	8574.52	14229.5
MICA3_HUMAN	[F-actin]-monooxygenase MICAL3 OS=Homo sapiens GN=MICAL3 PE=1 SV=2	1	20.13	1185.22	40664.6	630.962	14160.3
MAP1B_HUMAN;MAP1A_HUMAN	Microtubule-associated protein 1B OS=Homo sapiens GN=MAP1B PE=1 SV=2	3	175.88	6145.88	26232.1	9819.86	14065.9
STON2_HUMAN	Stonin-2 OS=Homo sapiens GN=STON2 PE=1 SV=1	1	59.43	6053.61	29222.2	6874.98	14050.3
PCDGK_HUMAN	Protocadherin gamma-C3 OS=Homo sapiens GN=PCDHGC3 PE=1 SV=1	1	31.17	14962.4	18358.4	8800.97	14040.6
MAP4_HUMAN	Microtubule-associated protein 4 OS=Homo sapiens GN=MAP4 PE=1 SV=3	1	31.04	10999.4	22817.2	8267.55	14028.1
GBB2_HUMAN	Guanine nucleotide-binding protein G(I)/G(S)/G(T) subunit beta-2 OS=Homo sapiens GN=GNB2 PE=1 SV=3	1	94.42	8189.65	16524.8	16976.6	13897
CLIP1_HUMAN	CAP-Gly domain-containing linker protein 1 OS=Homo sapiens GN=CLIP1 PE=1 SV=2	1	21.89	4722.57	30535.7	6340.31	13866.2
APOE_HUMAN	Apolipoprotein E OS=Homo sapiens GN=APOE PE=1 SV=1	1	31.08	345.679	38369.5	2534.52	13749.9
PTPRS_HUMAN	Receptor-type tyrosine-protein phosphatase S OS=Homo sapiens GN=PTPRS PE=1 SV=3	2	74.41	11837.3	17446.8	11643.8	13642.6
RPC1_HUMAN	DNA-directed RNA polymerase III subunit RPC1 OS=Homo sapiens GN=POLR3A PE=1 SV=2	1	40.77	33364.8	1047.88	6416.44	13609.7
CO7A1_HUMAN	Collagen alpha-1(VII) chain OS=Homo sapiens GN=COL7A1 PE=1 SV=2	1	32.57	13592.9	0	26966.6	13519.9
UBP14_HUMAN	Ubiquitin carboxyl-terminal hydrolase 14 OS=Homo sapiens GN=USP14 PE=1 SV=3	1	37.74	10460	14441.7	15339.9	13413.8
PCYOX_HUMAN	Prenylcysteine oxidase 1 OS=Homo sapiens GN=PCYOX1 PE=1 SV=3	2	67.87	13020	10875.6	15591.6	13162.4
CFAH_HUMAN	Complement factor H OS=Homo sapiens GN=CFH PE=1 SV=4	2	87.25	11853.6	6927.24	20401	13060.6
ZN423_HUMAN	Zinc finger protein 423 OS=Homo sapiens GN=ZNF423 PE=1 SV=1	1	27.94	16128.4	11810.7	11014.7	12984.6
ACSL4_HUMAN	Long-chain-fatty-acid--CoA ligase 4 OS=Homo sapiens GN=ACSL4 PE=1 SV=2	1	20.93	12350.2	22019.2	4379.86	12916.5
MED11_HUMAN	Mediator of RNA polymerase II transcription subunit 11 OS=Homo sapiens GN=MED11 PE=1 SV=2	1	27.15	11043.8	18842.5	8659.79	12848.7
1433E_HUMAN	14-3-3 protein epsilon OS=Homo sapiens GN=YWHAE PE=1 SV=1	3	212.41	8282.47	18962.7	11265.1	12836.8
TLN2_HUMAN	Talin-2 OS=Homo sapiens GN=TLN2 PE=1 SV=4	1	56.78	30194.8	6788.63	1103.24	12695.6
RHG01_HUMAN	Rho GTPase-activating protein 1 OS=Homo sapiens GN=ARHGAP1 PE=1 SV=1	2	75.51	9994.44	20080.2	7969.36	12681.3
RS6_HUMAN	40S ribosomal protein S6 OS=Homo sapiens GN=RPS6 PE=1 SV=1	2	69.6	4950.84	29317	3445.78	12571.2
RS21_HUMAN	40S ribosomal protein S21 OS=Homo sapiens GN=RPS21 PE=1 SV=1	1	26.33	10139.4	11.2537	27468.1	12539.6
DJB11_HUMAN	DnaJ homolog subfamily B member 11 OS=Homo sapiens GN=DNAJB11 PE=1 SV=1	3	93.92	11228.4	16862.9	9458.71	12516.7
EIF3B_HUMAN	Eukaryotic translation initiation factor 3 subunit B OS=Homo sapiens GN=EIF3B PE=1 SV=3	1	75.45	10576.8	16662.2	10178.1	12472.4
CNPD1_HUMAN	Protein CNPPD1 OS=Homo sapiens GN=CNPPD1 PE=2 SV=2	1	21.39	6149.52	19538	11716.9	12468.1
EXT2_HUMAN	Exostosin-2 OS=Homo sapiens GN=EXT2 PE=1 SV=1	1	32.77	10949.5	6985.63	19022.6	12319.2
EPDR1_HUMAN	Mammalian ependymin-related protein 1 OS=Homo sapiens GN=EPDR1 PE=1 SV=2	1	46.6	7197.18	20729.1	8601.17	12175.8
NOG1_HUMAN	Nucleolar GTP-binding protein 1 OS=Homo sapiens GN=GTPBP4 PE=1 SV=3	1	26.86	7469.24	18905	9824.3	12066.2
GALT2_HUMAN	Polypeptide N-acetylgalactosaminyltransferase 2 OS=Homo sapiens GN=GALNT2 PE=1 SV=1	2	56.84	10985.2	3185.03	21881.5	12017.2
GBRE_HUMAN	Gamma-aminobutyric acid receptor subunit epsilon OS=Homo sapiens GN=GABRE PE=2 SV=2	1	20.41	10140.6	17785.8	8111.63	12012.7
GPDM_HUMAN	Glycerol-3-phosphate dehydrogenase, mitochondrial OS=Homo sapiens GN=GPD2 PE=1 SV=3	2	54.06	5390.57	26600.6	4011.39	12000.9
CCD40_HUMAN	Coiled-coil domain-containing protein 40 OS=Homo sapiens GN=CCDC40 PE=2 SV=2	1	23.77	13593.3	2026.26	20353.2	11990.9
SRSF3_HUMAN	Serine/arginine-rich splicing factor 3 OS=Homo sapiens GN=SRSF3 PE=1 SV=1	1	44.22	10881.6	20099	4835	11938.5
COPD_HUMAN	Coatomer subunit delta OS=Homo sapiens GN=ARCN1 PE=1 SV=1	2	96.37	8946.75	6587.53	20183.7	11906
HDGF_HUMAN	Hepatoma-derived growth factor OS=Homo sapiens GN=HDGF PE=1 SV=1	1	21.29	11806.7	11885.3	11876.2	11856.1
PKCB1_HUMAN	Protein kinase C-binding protein 1 OS=Homo sapiens GN=ZMYND8 PE=1 SV=2	1	20.74	9423.76	13107.9	12905.2	11812.3
SRSF2_HUMAN	Serine/arginine-rich splicing factor 2 OS=Homo sapiens GN=SRSF2 PE=1 SV=4	1	37.43	6379.12	16571.9	12426.8	11792.6
EFTU_HUMAN	Elongation factor Tu, mitochondrial OS=Homo sapiens GN=TUFM PE=1 SV=2	3	82.78	7304.34	6553.08	21501.6	11786.3
COPG1_HUMAN;COPG2_HUMAN	Coatomer subunit gamma-1 OS=Homo sapiens GN=COPG1 PE=1 SV=1	3	175.08	8214.85	21176.8	5703.74	11698.5
INT3_HUMAN	Integrator complex subunit 3 OS=Homo sapiens GN=INTS3 PE=1 SV=1	1	28.37	31588	1824.62	1591.78	11668.1
OBAS1_HUMAN	Putative uncharacterized protein OBSCN-AS1 OS=Homo sapiens GN=OBSCN-AS1 PE=5 SV=1	1	52.11	0	28635.3	6317.98	11651.1
AATM_HUMAN	Aspartate aminotransferase, mitochondrial OS=Homo sapiens GN=GOT2 PE=1 SV=3	5	217.71	14792.1	7171.08	12807.9	11590.3
ACADV_HUMAN	Very long-chain specific acyl-CoA dehydrogenase, mitochondrial OS=Homo sapiens GN=ACADVL PE=1 SV=1	2	41.91	15045.2	2595.19	17021	11553.8
CDAC1_HUMAN	Cytidine and dCMP deaminase domain-containing protein 1 OS=Homo sapiens GN=CDADC1 PE=2 SV=1	1	21.84	9382.49	15397.2	9653.34	11477.7
PSB6_HUMAN	Proteasome subunit beta type-6 OS=Homo sapiens GN=PSMB6 PE=1 SV=4	1	38.76	6355.01	23651.4	4397.24	11467.9
PTN23_HUMAN	Tyrosine-protein phosphatase non-receptor type 23 OS=Homo sapiens GN=PTPN23 PE=1 SV=1	1	38.44	13612.1	1469.39	19150.8	11410.8
CCD51_HUMAN	Coiled-coil domain-containing protein 51 OS=Homo sapiens GN=CCDC51 PE=1 SV=2	1	21.66	6254.04	27725	159.925	11379.7
STC2_HUMAN	Stanniocalcin-2 OS=Homo sapiens GN=STC2 PE=1 SV=1	2	134.81	9679.78	5027.1	18563	11090
T106B_HUMAN	Transmembrane protein 106B OS=Homo sapiens GN=TMEM106B PE=1 SV=2	1	23.93	4971.24	25527	2712.27	11070.2
COMP_HUMAN	Cartilage oligomeric matrix protein OS=Homo sapiens GN=COMP PE=1 SV=2	2	85.68	7990.8	19614.6	5589.21	11064.9
UBP5_HUMAN	Ubiquitin carboxyl-terminal hydrolase 5 OS=Homo sapiens GN=USP5 PE=1 SV=2	2	66.55	4108.97	19481.8	9588.83	11059.9
PRELP_HUMAN	Prolargin OS=Homo sapiens GN=PRELP PE=1 SV=1	2	83.51	7276.16	5314.82	20217.4	10936.1
TCPB_HUMAN	T-complex protein 1 subunit beta OS=Homo sapiens GN=CCT2 PE=1 SV=4	2	135.27	6548.73	21544.6	4516.71	10870
PAIRB_HUMAN	Plasminogen activator inhibitor 1 RNA-binding protein OS=Homo sapiens GN=SERBP1 PE=1 SV=2	1	64.07	11725.8	16750.3	4060.44	10845.5
DNA2_HUMAN	DNA replication ATP-dependent helicase/nuclease DNA2 OS=Homo sapiens GN=DNA2 PE=1 SV=3	1	24.3	8745.7	10965.5	12309.2	10673.4
NEUS_HUMAN	Neuroserpin OS=Homo sapiens GN=SERPINI1 PE=1 SV=1	2	65.37	10341.4	19675.7	1725.86	10581
TCPZ_HUMAN	T-complex protein 1 subunit zeta OS=Homo sapiens GN=CCT6A PE=1 SV=3	1	28.37	8728.72	15241.3	7618.2	10529.4
ARP2_HUMAN	Actin-related protein 2 OS=Homo sapiens GN=ACTR2 PE=1 SV=1	2	81.46	9244.09	14252.5	8076.6	10524.4
IBP3_HUMAN	Insulin-like growth factor-binding protein 3 OS=Homo sapiens GN=IGFBP3 PE=1 SV=2	4	142.77	8869.75	11184	11471.8	10508.5
RL27A_HUMAN	60S ribosomal protein L27a OS=Homo sapiens GN=RPL27A PE=1 SV=2	1	38.23	13341.8	6264.4	11746	10450.7
QOR_HUMAN	Quinone oxidoreductase OS=Homo sapiens GN=CRYZ PE=1 SV=1	1	28.48	8036.36	18222.3	4833.33	10364
RS2_HUMAN	40S ribosomal protein S2 OS=Homo sapiens GN=RPS2 PE=1 SV=2	3	101.82	9154.02	12784.6	9060.21	10332.9
RCN3_HUMAN	Reticulocalbin-3 OS=Homo sapiens GN=RCN3 PE=1 SV=1	1	75.58	9271.63	15724.5	5876.29	10290.8
G6PD_HUMAN	Glucose-6-phosphate 1-dehydrogenase OS=Homo sapiens GN=G6PD PE=1 SV=4	2	118.84	3829.54	17235.2	9721.54	10262.1
PKP2_HUMAN	Plakophilin-2 OS=Homo sapiens GN=PKP2 PE=1 SV=2	1	30.61	5872.99	7404.45	17453	10243.5
SEPT2_HUMAN	Septin-2 OS=Homo sapiens GN=SEPT2 PE=1 SV=1	4	167.51	7244.16	12918.9	10448	10203.7
RAI1_HUMAN	Retinoic acid-induced protein 1 OS=Homo sapiens GN=RAI1 PE=1 SV=2	1	23.98	13177.4	1480.19	15756.6	10138.1
PSG5_HUMAN	Pregnancy-specific beta-1-glycoprotein 5 OS=Homo sapiens GN=PSG5 PE=1 SV=3	1	222.87	4845.88	20766.1	4765.09	10125.7
GSTM3_HUMAN	Glutathione S-transferase Mu 3 OS=Homo sapiens GN=GSTM3 PE=1 SV=3	1	24.89	0	30237.9	18.9615	10085.6
MYO1C_HUMAN	Unconventional myosin-Ic OS=Homo sapiens GN=MYO1C PE=1 SV=4	1	24.72	2373.22	12226.2	15557.4	10052.3
HNRPM_HUMAN	Heterogeneous nuclear ribonucleoprotein M OS=Homo sapiens GN=HNRNPM PE=1 SV=3	2	73.47	10430.7	10150.5	9501.99	10027.7
PCBP2_HUMAN	Poly(rC)-binding protein 2 OS=Homo sapiens GN=PCBP2 PE=1 SV=1	1	78.78	7661.11	17111.4	5143.99	9972.16
OMD_HUMAN	Osteomodulin OS=Homo sapiens GN=OMD PE=1 SV=1	2	78.05	20238.4	3526.33	6061.74	9942.15
UD3A1_HUMAN	UDP-glucuronosyltransferase 3A1 OS=Homo sapiens GN=UGT3A1 PE=2 SV=1	1	26.81	4985.2	9997.98	14841.1	9941.44
TWF1_HUMAN	Twinfilin-1 OS=Homo sapiens GN=TWF1 PE=1 SV=3	1	22.78	7904.78	13458.5	8307.83	9890.38
ITIH5_HUMAN	Inter-alpha-trypsin inhibitor heavy chain H5 OS=Homo sapiens GN=ITIH5 PE=2 SV=2	3	124.36	4258.85	24308.6	1049.34	9872.27
IGF2_HUMAN	Insulin-like growth factor II OS=Homo sapiens GN=IGF2 PE=1 SV=1	1	33.98	3579.97	22920.1	2982.82	9827.63
MY18B_HUMAN	Unconventional myosin-XVIIIb OS=Homo sapiens GN=MYO18B PE=1 SV=1	1	21.95	8933.35	11614.3	8540.25	9695.95
ASPH_HUMAN	Aspartyl/asparaginyl beta-hydroxylase OS=Homo sapiens GN=ASPH PE=1 SV=3	2	108.63	8722.01	15641	4646.8	9669.92
ELN_HUMAN	Elastin OS=Homo sapiens GN=ELN PE=1 SV=3	1	36.37	15633.2	12293	899.908	9608.69
FREM3_HUMAN	FRAS1-related extracellular matrix protein 3 OS=Homo sapiens GN=FREM3 PE=3 SV=2	1	32.48	6019.04	17679.2	5060.01	9586.1
PAPP1_HUMAN	Pappalysin-1 OS=Homo sapiens GN=PAPPA PE=1 SV=3	1	36.91	10613.4	9909.82	8147.41	9556.88
TBB2A_HUMAN	Tubulin beta-2A chain OS=Homo sapiens GN=TUBB2A PE=1 SV=1	1	463.87	19849.1	760.335	7990.51	9533.31
PRS23_HUMAN	Serine protease 23 OS=Homo sapiens GN=PRSS23 PE=1 SV=1	2	64.88	3025.34	6150.93	19343.7	9506.66
ERP44_HUMAN;LIS1_HUMAN	Endoplasmic reticulum resident protein 44 OS=Homo sapiens GN=ERP44 PE=1 SV=1	3	136.62	7139.7	12064.9	9089.39	9431.34
BGAL_HUMAN	Beta-galactosidase OS=Homo sapiens GN=GLB1 PE=1 SV=2	2	89.01	6850.44	12114.5	9291.55	9418.82
IDHC_HUMAN;IDHP_HUMAN	Isocitrate dehydrogenase [NADP] cytoplasmic OS=Homo sapiens GN=IDH1 PE=1 SV=2	3	102.43	6470.28	14380.4	7366.08	9405.59
NFASC_HUMAN	Neurofascin OS=Homo sapiens GN=NFASC PE=1 SV=4	3	120.06	10320.3	11604.2	6205.05	9376.53
EMSY_HUMAN	BRCA2-interacting transcriptional repressor EMSY OS=Homo sapiens GN=EMSY PE=1 SV=2	1	23.13	2471.26	23665.4	1989	9375.22
RD23B_HUMAN	UV excision repair protein RAD23 homolog B OS=Homo sapiens GN=RAD23B PE=1 SV=1	1	32.43	6272.02	11717.1	10110.1	9366.41
H4_HUMAN	Histone H4 OS=Homo sapiens GN=HIST1H4A PE=1 SV=2	2	60.48	7245.85	12784.6	7896.38	9308.92
IF5A1_HUMAN;IF5AL_HUMAN	Eukaryotic translation initiation factor 5A-1 OS=Homo sapiens GN=EIF5A PE=1 SV=2	2	78.18	8328.02	12856.3	6710.68	9298.34
LEG3_HUMAN	Galectin-3 OS=Homo sapiens GN=LGALS3 PE=1 SV=5	2	66.86	5437.14	17007.1	5297.95	9247.41
SC24D_HUMAN	Protein transport protein Sec24D OS=Homo sapiens GN=SEC24D PE=1 SV=2	1	36.58	3586.9	17016.4	7028.34	9210.55
PSA2_HUMAN	Proteasome subunit alpha type-2 OS=Homo sapiens GN=PSMA2 PE=1 SV=2	1	54.48	5190.32	11409.8	10911.1	9170.44
CAZA1_HUMAN	F-actin-capping protein subunit alpha-1 OS=Homo sapiens GN=CAPZA1 PE=1 SV=3	1	106.92	2721.49	10074.2	14669.2	9154.96
CNN2_HUMAN	Calponin-2 OS=Homo sapiens GN=CNN2 PE=1 SV=4	1	68.58	5693.05	19590.2	1962.33	9081.86
SYDC_HUMAN	Aspartate--tRNA ligase, cytoplasmic OS=Homo sapiens GN=DARS PE=1 SV=2	3	158.56	6701.06	9388.73	11106.9	9065.57
LRC15_HUMAN	Leucine-rich repeat-containing protein 15 OS=Homo sapiens GN=LRRC15 PE=2 SV=2	2	75.6	6964.75	4615.17	15469	9016.31
2AAA_HUMAN	Serine/threonine-protein phosphatase 2A 65 kDa regulatory subunit A alpha isoform OS=Homo sapiens GN=PPP2R1A PE=1 SV=4	1	32.99	7209.57	848.219	18972.2	9009.99
ADHX_HUMAN	Alcohol dehydrogenase class-3 OS=Homo sapiens GN=ADH5 PE=1 SV=4	2	52.29	10706.6	6021.91	10084.3	8937.59
SRCRL_HUMAN	Soluble scavenger receptor cysteine-rich domain-containing protein SSC5D OS=Homo sapiens GN=SSC5D PE=1 SV=3	1	38.28	9011.64	6367.78	11401.9	8927.1
SYWC_HUMAN	Tryptophan--tRNA ligase, cytoplasmic OS=Homo sapiens GN=WARS PE=1 SV=2	5	227.2	6508.01	18062	2150.91	8906.96
NR0B1_HUMAN	Nuclear receptor subfamily 0 group B member 1 OS=Homo sapiens GN=NR0B1 PE=1 SV=2	1	21.21	5733.95	14767.6	5733.91	8745.17
ZNF26_HUMAN	Zinc finger protein 26 OS=Homo sapiens GN=ZNF26 PE=1 SV=3	1	32.24	11431.5	1428.46	13333.1	8731.02
COBA1_HUMAN	Collagen alpha-1(XI) chain OS=Homo sapiens GN=COL11A1 PE=1 SV=4	1	60.66	3267.18	14879	8035.32	8727.17
ADA10_HUMAN	Disintegrin and metalloproteinase domain-containing protein 10 OS=Homo sapiens GN=ADAM10 PE=1 SV=1	3	116.01	10243	10809.3	4986.22	8679.5
CATS_HUMAN	Cathepsin S OS=Homo sapiens GN=CTSS PE=1 SV=3	1	42.75	4654.9	14487.3	6694.51	8612.22
GOLM1_HUMAN	Golgi membrane protein 1 OS=Homo sapiens GN=GOLM1 PE=1 SV=1	3	94.62	11066	4650.69	10020	8578.88
APAF_HUMAN	Apoptotic protease-activating factor 1 OS=Homo sapiens GN=APAF1 PE=1 SV=2	1	23.44	6768.33	7604.7	11353.5	8575.51
GRN_HUMAN	Granulins OS=Homo sapiens GN=GRN PE=1 SV=2	1	24.94	11738.6	7521.04	6348.22	8535.96
SEPR_HUMAN	Prolyl endopeptidase FAP OS=Homo sapiens GN=FAP PE=1 SV=5	4	144.51	9859.36	10264.3	5465.06	8529.59
FERM1_HUMAN	Fermitin family homolog 1 OS=Homo sapiens GN=FERMT1 PE=1 SV=1	1	22.42	18064.2	4377.71	2544	8328.65
SIAE_HUMAN	Sialate O-acetylesterase OS=Homo sapiens GN=SIAE PE=1 SV=1	1	27.05	6878.95	10920.6	7093.47	8297.69
RAC1_HUMAN	Ras-related C3 botulinum toxin substrate 1 OS=Homo sapiens GN=RAC1 PE=1 SV=1	1	46.07	10109.5	6882.08	7614.39	8201.98
PDK2_HUMAN	[Pyruvate dehydrogenase (acetyl-transferring)] kinase isozyme 2, mitochondrial OS=Homo sapiens GN=PDK2 PE=1 SV=2	1	21.11	3883.5	13265.5	7386.93	8178.64
CELR1_HUMAN	Cadherin EGF LAG seven-pass G-type receptor 1 OS=Homo sapiens GN=CELSR1 PE=1 SV=1	1	20.85	9595.71	8730.23	6198.78	8174.91
ZN362_HUMAN	Zinc finger protein 362 OS=Homo sapiens GN=ZNF362 PE=1 SV=1	1	31.62	5110.97	622.498	18769.7	8167.73
FLRT2_HUMAN	Leucine-rich repeat transmembrane protein FLRT2 OS=Homo sapiens GN=FLRT2 PE=1 SV=1	3	116.86	7864.25	8647.38	7892.94	8134.86
IF4B_HUMAN	Eukaryotic translation initiation factor 4B OS=Homo sapiens GN=EIF4B PE=1 SV=2	2	80.42	5445.21	13115	5759.9	8106.7
GSHR_HUMAN	Glutathione reductase, mitochondrial OS=Homo sapiens GN=GSR PE=1 SV=2	2	60.41	8727.47	7470.09	8082.69	8093.42
AP2M1_HUMAN	AP-2 complex subunit mu OS=Homo sapiens GN=AP2M1 PE=1 SV=2	3	93.87	5048.78	14469.5	4592.41	8036.89
PD1L2_HUMAN	Programmed cell death 1 ligand 2 OS=Homo sapiens GN=PDCD1LG2 PE=1 SV=2	2	72.71	7772.28	14712	1592.13	8025.47
S3TC1_HUMAN	SH3 domain and tetratricopeptide repeat-containing protein 1 OS=Homo sapiens GN=SH3TC1 PE=1 SV=3	1	26.09	1132.91	13633.1	9178.48	7981.49
AMPB_HUMAN	Aminopeptidase B OS=Homo sapiens GN=RNPEP PE=1 SV=2	1	26.08	13533.2	3538.8	6664.67	7912.23
ML12A_HUMAN	Myosin regulatory light chain 12A OS=Homo sapiens GN=MYL12A PE=1 SV=2	1	40.06	4242.65	15095.8	4314.28	7884.26
PFD5_HUMAN	Prefoldin subunit 5 OS=Homo sapiens GN=PFDN5 PE=1 SV=2	1	25.7	4957.63	8754.54	9909.27	7873.81
MORC3_HUMAN	MORC family CW-type zinc finger protein 3 OS=Homo sapiens GN=MORC3 PE=1 SV=3	1	23.83	10054	1825.53	11561.1	7813.56
AMPN_HUMAN	Aminopeptidase N OS=Homo sapiens GN=ANPEP PE=1 SV=4	2	90.13	6632.67	9167.57	7576.33	7792.19
DDX3X_HUMAN;DDX3Y_HUMAN	ATP-dependent RNA helicase DDX3X OS=Homo sapiens GN=DDX3X PE=1 SV=3	2	98.96	10430.8	7177.26	5723.65	7777.25
ARPC5_HUMAN	Actin-related protein 2/3 complex subunit 5 OS=Homo sapiens GN=ARPC5 PE=1 SV=3	1	38.02	6574.37	12335.3	4383.19	7764.27
F10A1_HUMAN	Hsc70-interacting protein OS=Homo sapiens GN=ST13 PE=1 SV=2	2	64.61	3426.49	2762.7	16637.3	7608.84
TEX2_HUMAN	Testis-expressed protein 2 OS=Homo sapiens GN=TEX2 PE=1 SV=2	1	31.01	11997.6	7732.98	3080.27	7603.63
H15_HUMAN	Histone H1.5 OS=Homo sapiens GN=HIST1H1B PE=1 SV=3	2	68.53	8874.68	6456.74	7248.28	7526.57
S22AP_HUMAN	Solute carrier family 22 member 25 OS=Homo sapiens GN=SLC22A25 PE=2 SV=2	1	33.84	8456.02	316.571	13796	7522.85
CUBN_HUMAN	Cubilin OS=Homo sapiens GN=CUBN PE=1 SV=5	1	23.95	3426.19	2528.01	16461.5	7471.88
DPP3_HUMAN	Dipeptidyl peptidase 3 OS=Homo sapiens GN=DPP3 PE=1 SV=2	1	32.75	7858.02	7812.72	6739.8	7470.18
IF6_HUMAN	Eukaryotic translation initiation factor 6 OS=Homo sapiens GN=EIF6 PE=1 SV=1	1	20.96	1693.76	15206.9	5199.19	7366.61
INHBA_HUMAN	Inhibin beta A chain OS=Homo sapiens GN=INHBA PE=1 SV=2	1	48.66	2353.49	16168.6	3557.13	7359.74
DHE3_HUMAN	Glutamate dehydrogenase 1, mitochondrial OS=Homo sapiens GN=GLUD1 PE=1 SV=2	1	24.12	6467.04	3028.08	12535.7	7343.62
SUMO2_HUMAN	Small ubiquitin-related modifier 2 OS=Homo sapiens GN=SUMO2 PE=1 SV=3	1	29.23	8851.71	8766.74	4369.03	7329.16
FAM9B_HUMAN	Protein FAM9B OS=Homo sapiens GN=FAM9B PE=1 SV=1	1	27.47	3539.22	479.297	17845.2	7287.92
RBM10_HUMAN	RNA-binding protein 10 OS=Homo sapiens GN=RBM10 PE=1 SV=3	1	21.53	5330.08	251.455	16209.4	7263.64
VITRN_HUMAN	Vitrin OS=Homo sapiens GN=VIT PE=2 SV=1	2	77.8	2375.12	13063.3	6187.32	7208.6
ARPC2_HUMAN	Actin-related protein 2/3 complex subunit 2 OS=Homo sapiens GN=ARPC2 PE=1 SV=1	2	64.18	6640.39	5809.73	9152.79	7200.97
GRM2A_HUMAN	GRAM domain-containing protein 2A OS=Homo sapiens GN=GRAMD2A PE=1 SV=2	1	22.06	9153.07	5085.84	6715.35	6984.75
XRCC5_HUMAN	X-ray repair cross-complementing protein 5 OS=Homo sapiens GN=XRCC5 PE=1 SV=3	1	77.45	5254.2	10567	5110.63	6977.27
CE85L_HUMAN	Centrosomal protein of 85 kDa-like OS=Homo sapiens GN=CEP85L PE=1 SV=1	1	48.15	7799.12	6979.36	6078.01	6952.16
RISC_HUMAN	Retinoid-inducible serine carboxypeptidase OS=Homo sapiens GN=SCPEP1 PE=1 SV=1	1	52.8	816.861	15115.2	4899.86	6943.96
RUVB1_HUMAN	RuvB-like 1 OS=Homo sapiens GN=RUVBL1 PE=1 SV=1	4	129.66	6184.35	7297.62	7221.72	6901.23
ADT1_HUMAN;ADT4_HUMAN	ADP/ATP translocase 1 OS=Homo sapiens GN=SLC25A4 PE=1 SV=4	2	62	6059.16	8403.15	5821.16	6761.16
P5CS_HUMAN	Delta-1-pyrroline-5-carboxylate synthase OS=Homo sapiens GN=ALDH18A1 PE=1 SV=2	1	31.25	5060.65	480.393	14655.5	6732.18
RL5_HUMAN	60S ribosomal protein L5 OS=Homo sapiens GN=RPL5 PE=1 SV=3	1	50.15	12681.5	6048.49	1444.86	6724.96
SCRN1_HUMAN	Secernin-1 OS=Homo sapiens GN=SCRN1 PE=1 SV=2	1	47.68	5969.85	7994.71	6109.62	6691.39
RS25_HUMAN	40S ribosomal protein S25 OS=Homo sapiens GN=RPS25 PE=1 SV=1	1	44.54	3182.8	13020.1	3821.48	6674.8
RNH1_HUMAN	Ribonuclease H1 OS=Homo sapiens GN=RNASEH1 PE=1 SV=2	1	22.99	4899.59	3834.54	11122.2	6618.77
RL7_HUMAN	60S ribosomal protein L7 OS=Homo sapiens GN=RPL7 PE=1 SV=1	1	66.15	6860.34	8803.02	4008.1	6557.15
SFRP2_HUMAN	Secreted frizzled-related protein 2 OS=Homo sapiens GN=SFRP2 PE=1 SV=2	2	55.8	3057.05	1021.25	15497.8	6525.37
AN32B_HUMAN;AN32A_HUMAN	Acidic leucine-rich nuclear phosphoprotein 32 family member B OS=Homo sapiens GN=ANP32B PE=1 SV=1	2	90.54	3101.24	6371.88	9827.15	6433.42
POP1_HUMAN	Ribonucleases P/MRP protein subunit POP1 OS=Homo sapiens GN=POP1 PE=1 SV=2	2	65.49	4320.6	4723.72	10081.6	6375.3
PTBP1_HUMAN;PTBP3_HUMAN	Polypyrimidine tract-binding protein 1 OS=Homo sapiens GN=PTBP1 PE=1 SV=1	1	29.33	3344.79	9399.59	6282.12	6342.17
SON_HUMAN	Protein SON OS=Homo sapiens GN=SON PE=1 SV=4	1	22.23	3226.96	8630.79	7117.66	6325.14
UTP20_HUMAN	Small subunit processome component 20 homolog OS=Homo sapiens GN=UTP20 PE=1 SV=3	1	20.15	2206.45	14583.6	2091.48	6293.84
ARF4_HUMAN	ADP-ribosylation factor 4 OS=Homo sapiens GN=ARF4 PE=1 SV=3	2	101.29	6259.15	6093.94	6439.82	6264.31
SYT16_HUMAN	Synaptotagmin-16 OS=Homo sapiens GN=SYT16 PE=1 SV=2	1	22.09	2813.82	15433.1	453.54	6233.5
CC112_HUMAN	Coiled-coil domain-containing protein 112 OS=Homo sapiens GN=CCDC112 PE=1 SV=2	1	20.46	9754.44	6800.73	2119.82	6225
ACSL1_HUMAN	Long-chain-fatty-acid--CoA ligase 1 OS=Homo sapiens GN=ACSL1 PE=1 SV=1	1	25.81	8682.78	198.092	9588.85	6156.57
CD9_HUMAN	CD9 antigen OS=Homo sapiens GN=CD9 PE=1 SV=4	1	31.38	1920.92	11488.7	4549.36	5986.34
RS9_HUMAN	40S ribosomal protein S9 OS=Homo sapiens GN=RPS9 PE=1 SV=3	6	197.8	5574.16	6120.63	6017.03	5903.94
CO4A_HUMAN;CO4B_HUMAN	Complement C4-A OS=Homo sapiens GN=C4A PE=1 SV=2	4	150.06	5659.95	3526.54	8265.37	5817.29
YETS4_HUMAN	YEATS domain-containing protein 4 OS=Homo sapiens GN=YEATS4 PE=1 SV=1	1	27.77	1191.33	14616.4	1612.63	5806.78
METRL_HUMAN	Meteorin-like protein OS=Homo sapiens GN=METRNL PE=2 SV=1	1	26.48	2609.11	5903.09	8871.39	5794.53
RL17_HUMAN	60S ribosomal protein L17 OS=Homo sapiens GN=RPL17 PE=1 SV=3	1	25.12	5449.68	7214.09	4624.19	5762.65
DYH5_HUMAN	Dynein heavy chain 5, axonemal OS=Homo sapiens GN=DNAH5 PE=1 SV=3	1	21.15	7382.13	6130.87	3726.48	5746.49
ANAG_HUMAN	Alpha-N-acetylglucosaminidase OS=Homo sapiens GN=NAGLU PE=1 SV=2	2	87	11793.7	3735.16	1668.33	5732.4
EPCR_HUMAN	Endothelial protein C receptor OS=Homo sapiens GN=PROCR PE=1 SV=1	1	33.38	9100.37	2633.69	5422.49	5718.85
LMAN1_HUMAN	Protein ERGIC-53 OS=Homo sapiens GN=LMAN1 PE=1 SV=2	1	47.8	9609.36	1636.08	5852.78	5699.41
ENOG_HUMAN	Gamma-enolase OS=Homo sapiens GN=ENO2 PE=1 SV=3	1	117.17	4425.25	3493.61	9116.48	5678.45
ACPH_HUMAN	Acylamino-acid-releasing enzyme OS=Homo sapiens GN=APEH PE=1 SV=4	1	42.38	2452.48	12107.7	2388.46	5649.54
CYS1_HUMAN	Cystin-1 OS=Homo sapiens GN=CYS1 PE=1 SV=1	1	32.31	14455.3	2071.53	371.699	5632.83
EWS_HUMAN	RNA-binding protein EWS OS=Homo sapiens GN=EWSR1 PE=1 SV=1	1	39.37	3943.06	8922.47	4026.41	5630.65
DCR1C_HUMAN	Protein artemis OS=Homo sapiens GN=DCLRE1C PE=1 SV=2	1	26.1	6881.55	194.451	9778.96	5618.32
NQO1_HUMAN	NAD(P)H dehydrogenase [quinone] 1 OS=Homo sapiens GN=NQO1 PE=1 SV=1	2	82.44	3886.07	7790.29	5116.22	5597.53
ADRM1_HUMAN	Proteasomal ubiquitin receptor ADRM1 OS=Homo sapiens GN=ADRM1 PE=1 SV=2	1	50.91	7170.12	5791.66	3732.83	5564.87
RL18A_HUMAN	60S ribosomal protein L18a OS=Homo sapiens GN=RPL18A PE=1 SV=2	1	57.6	5146.82	1575.08	9898.65	5540.18
EXT1_HUMAN	Exostosin-1 OS=Homo sapiens GN=EXT1 PE=1 SV=2	1	25.09	7361.74	3695.89	5479.64	5512.42
SEPT9_HUMAN	Septin-9 OS=Homo sapiens GN=SEPT9 PE=1 SV=2	2	54.2	5796.04	6122.32	4486.13	5468.16
O5AC2_HUMAN	Olfactory receptor 5AC2 OS=Homo sapiens GN=OR5AC2 PE=3 SV=2	1	22.06	5534.32	5737.17	4825.05	5365.52
HSP13_HUMAN	Heat shock 70 kDa protein 13 OS=Homo sapiens GN=HSPA13 PE=1 SV=1	1	34	2973.75	8939.75	4021.05	5311.52
KAPCA_HUMAN;KAPCB_HUMAN	cAMP-dependent protein kinase catalytic subunit alpha OS=Homo sapiens GN=PRKACA PE=1 SV=2	2	62.49	4688.61	11177.1	66.5218	5310.73
ARSB_HUMAN	Arylsulfatase B OS=Homo sapiens GN=ARSB PE=1 SV=1	1	24.1	5717	3796.86	6364.55	5292.8
SPEE_HUMAN	Spermidine synthase OS=Homo sapiens GN=SRM PE=1 SV=1	1	25.46	9360.73	5397.41	1090.07	5282.74
1A03_HUMAN;1A01_HUMAN;1A11_HUMAN;1A23_HUMAN;1A80_HUMAN;HLAF_HUMAN;HLAH_HUMAN	HLA class I histocompatibility antigen, A-3 alpha chain OS=Homo sapiens GN=HLA-A PE=1 SV=2	1	295.76	11031.8	3574.65	1197.82	5268.1
SCNND_HUMAN	Amiloride-sensitive sodium channel subunit delta OS=Homo sapiens GN=SCNN1D PE=1 SV=2	1	22.43	1602.51	1495.73	12468.4	5188.88
CD59_HUMAN	CD59 glycoprotein OS=Homo sapiens GN=CD59 PE=1 SV=1	1	34.24	1995.91	9700.27	3752.86	5149.68
CCD80_HUMAN	Coiled-coil domain-containing protein 80 OS=Homo sapiens GN=CCDC80 PE=1 SV=1	3	139.2	4084.8	4509.11	6781.07	5125
GGH_HUMAN	Gamma-glutamyl hydrolase OS=Homo sapiens GN=GGH PE=1 SV=2	3	124.4	3286.14	3506.02	8555.76	5115.97
ANS1A_HUMAN	Ankyrin repeat and SAM domain-containing protein 1A OS=Homo sapiens GN=ANKS1A PE=1 SV=4	1	20.15	4874.88	7332.12	3058.48	5088.49
EZRI_HUMAN	Ezrin OS=Homo sapiens GN=EZR PE=1 SV=4	1	219.77	5582.69	4970.92	4613.71	5055.77
ARPC4_HUMAN	Actin-related protein 2/3 complex subunit 4 OS=Homo sapiens GN=ARPC4 PE=1 SV=3	1	27.87	2950.02	8546.24	3483.81	4993.35
AP1B1_HUMAN	AP-1 complex subunit beta-1 OS=Homo sapiens GN=AP1B1 PE=1 SV=2	1	61.71	2622.54	10213.4	2002.27	4946.07
MXRA8_HUMAN	Matrix remodeling-associated protein 8 OS=Homo sapiens GN=MXRA8 PE=1 SV=1	1	50.87	4864.3	4155.14	5759.77	4926.4
HMCN1_HUMAN	Hemicentin-1 OS=Homo sapiens GN=HMCN1 PE=1 SV=2	1	23.54	3887.63	1789.87	8994.53	4890.68
SAHH_HUMAN	Adenosylhomocysteinase OS=Homo sapiens GN=AHCY PE=1 SV=4	3	91.59	7548.73	2411.56	4668.4	4876.23
ANK3_HUMAN	Ankyrin-3 OS=Homo sapiens GN=ANK3 PE=1 SV=3	1	27.59	2529.75	1940.03	9593.26	4687.68
FA10_HUMAN	Coagulation factor X OS=Homo sapiens GN=F10 PE=1 SV=2	1	37.62	3351.99	6872.14	3780.2	4668.11
PLD3_HUMAN	Phospholipase D3 OS=Homo sapiens GN=PLD3 PE=1 SV=1	1	33.29	2767.74	8452.44	2752.65	4657.61
PGFRB_HUMAN	Platelet-derived growth factor receptor beta OS=Homo sapiens GN=PDGFRB PE=1 SV=1	1	39.2	3219.3	7737.86	2947.44	4634.86
GBB1_HUMAN;GBB3_HUMAN	Guanine nucleotide-binding protein G(I)/G(S)/G(T) subunit beta-1 OS=Homo sapiens GN=GNB1 PE=1 SV=3	1	86.78	5694.63	364.44	7809.51	4622.86
GAS8_HUMAN	Growth arrest-specific protein 8 OS=Homo sapiens GN=GAS8 PE=1 SV=1	1	22.52	3213.17	1871.39	8767.15	4617.24
CCD18_HUMAN	Coiled-coil domain-containing protein 18 OS=Homo sapiens GN=CCDC18 PE=1 SV=1	1	41.74	7060.42	73.2359	6716.2	4616.62
RRAS_HUMAN	Ras-related protein R-Ras OS=Homo sapiens GN=RRAS PE=1 SV=1	1	25.5	7664.74	1977.74	4156.81	4599.76
RS5_HUMAN	40S ribosomal protein S5 OS=Homo sapiens GN=RPS5 PE=1 SV=4	1	25.87	3982.7	5080.55	4702.05	4588.43
PARK7_HUMAN	Protein/nucleic acid deglycase DJ-1 OS=Homo sapiens GN=PARK7 PE=1 SV=2	1	27.34	2579.29	7138.9	4034.1	4584.1
PRS8_HUMAN	26S proteasome regulatory subunit 8 OS=Homo sapiens GN=PSMC5 PE=1 SV=1	1	94.63	4071.44	4724.52	4924.63	4573.53
MAEL_HUMAN	Protein maelstrom homolog OS=Homo sapiens GN=MAEL PE=1 SV=1	1	28.25	3984.99	3100.89	6587.84	4557.9
NASP_HUMAN	Nuclear autoantigenic sperm protein OS=Homo sapiens GN=NASP PE=1 SV=2	1	25.92	12745.4	443.927	460.116	4549.83
RS3A_HUMAN	40S ribosomal protein S3a OS=Homo sapiens GN=RPS3A PE=1 SV=2	3	103.04	4320.71	7992.67	1286.56	4533.31
GOSR1_HUMAN	Golgi SNAP receptor complex member 1 OS=Homo sapiens GN=GOSR1 PE=1 SV=1	1	31.11	2823.35	9941.22	688.562	4484.37
IGG1_HUMAN	Immunoglobulin gamma-1 heavy chain OS=Homo sapiens PE=1 SV=1	1	24.18	5346	2789.56	5280.97	4472.18
MACF1_HUMAN	Microtubule-actin cross-linking factor 1, isoforms 1/2/3/5 OS=Homo sapiens GN=MACF1 PE=1 SV=4	1	21.96	2159.96	5795.45	5255.22	4403.54
ANO1_HUMAN	Anoctamin-1 OS=Homo sapiens GN=ANO1 PE=1 SV=1	1	20	2367.93	5793.38	4964.53	4375.28
ACOC_HUMAN	Cytoplasmic aconitate hydratase OS=Homo sapiens GN=ACO1 PE=1 SV=3	1	33.54	7303.98	4908.52	857.024	4356.51
TRPM5_HUMAN	Transient receptor potential cation channel subfamily M member 5 OS=Homo sapiens GN=TRPM5 PE=2 SV=1	1	24.29	4766.5	1102.37	7179.55	4349.47
CC121_HUMAN	Coiled-coil domain-containing protein 121 OS=Homo sapiens GN=CCDC121 PE=1 SV=1	1	30.95	4492.39	2717.78	5828.05	4346.07
DCBD2_HUMAN	Discoidin, CUB and LCCL domain-containing protein 2 OS=Homo sapiens GN=DCBLD2 PE=1 SV=1	1	37.25	1428.28	10531	908.84	4289.37
HNRPR_HUMAN	Heterogeneous nuclear ribonucleoprotein R OS=Homo sapiens GN=HNRNPR PE=1 SV=1	1	97.63	4647.82	5526.47	2657.37	4277.22
ACTZ_HUMAN;ACTY_HUMAN	Alpha-centractin OS=Homo sapiens GN=ACTR1A PE=1 SV=1	2	88.78	1188.03	6719.32	4913.37	4273.58
HYOU1_HUMAN	Hypoxia up-regulated protein 1 OS=Homo sapiens GN=HYOU1 PE=1 SV=1	1	26.05	1628.14	10267.9	851.93	4249.33
ITIH3_HUMAN	Inter-alpha-trypsin inhibitor heavy chain H3 OS=Homo sapiens GN=ITIH3 PE=1 SV=2	1	42.06	3643.43	5901.65	3136.34	4227.14
EXOC7_HUMAN	Exocyst complex component 7 OS=Homo sapiens GN=EXOC7 PE=1 SV=3	1	23.21	2315.25	5491.16	4761.42	4189.28
GRID2_HUMAN	Glutamate receptor ionotropic, delta-2 OS=Homo sapiens GN=GRID2 PE=1 SV=2	1	24.31	975.819	2015.32	9501.89	4164.34
PRS10_HUMAN	26S proteasome regulatory subunit 10B OS=Homo sapiens GN=PSMC6 PE=1 SV=1	2	64.27	2275.61	9266.93	886.458	4143
P4HA2_HUMAN	Prolyl 4-hydroxylase subunit alpha-2 OS=Homo sapiens GN=P4HA2 PE=1 SV=1	1	21.5	4684.26	5948.15	1750.12	4127.51
EF1A2_HUMAN	Elongation factor 1-alpha 2 OS=Homo sapiens GN=EEF1A2 PE=1 SV=1	1	201.43	10329.7	733.631	1307.18	4123.52
H12_HUMAN;H11_HUMAN	Histone H1.2 OS=Homo sapiens GN=HIST1H1C PE=1 SV=2	2	81.09	6276.75	670.08	5404.57	4117.13
TRIM2_HUMAN	Tripartite motif-containing protein 2 OS=Homo sapiens GN=TRIM2 PE=1 SV=1	1	21.44	1040.45	223.911	10951.4	4071.92
UBP47_HUMAN	Ubiquitin carboxyl-terminal hydrolase 47 OS=Homo sapiens GN=USP47 PE=1 SV=3	1	29.91	3903.81	2603.65	5619.54	4042.33
C1QT5_HUMAN	Complement C1q tumor necrosis factor-related protein 5 OS=Homo sapiens GN=C1QTNF5 PE=1 SV=1	1	27.55	2351.27	7828.39	1500.15	3893.27
GSE1_HUMAN	Genetic suppressor element 1 OS=Homo sapiens GN=GSE1 PE=1 SV=3	1	25.59	1400.16	350.101	9920.6	3890.29
DDX46_HUMAN	Probable ATP-dependent RNA helicase DDX46 OS=Homo sapiens GN=DDX46 PE=1 SV=2	1	25.56	2762	4798.81	4109.9	3890.24
A1BG_HUMAN	Alpha-1B-glycoprotein OS=Homo sapiens GN=A1BG PE=1 SV=4	1	24.63	3373.06	1243.53	7017.88	3878.16
OST48_HUMAN	Dolichyl-diphosphooligosaccharide--protein glycosyltransferase 48 kDa subunit OS=Homo sapiens GN=DDOST PE=1 SV=4	2	110.9	9059.09	2227.11	327.415	3871.21
H10_HUMAN	Histone H1.0 OS=Homo sapiens GN=H1F0 PE=1 SV=3	1	39.54	1594.35	8828.38	954.55	3792.43
EHD1_HUMAN	EH domain-containing protein 1 OS=Homo sapiens GN=EHD1 PE=1 SV=2	1	33.63	3145.92	3302.13	4892.59	3780.21
PTGR1_HUMAN	Prostaglandin reductase 1 OS=Homo sapiens GN=PTGR1 PE=1 SV=2	2	67.3	2928.56	3920.83	4452.23	3767.21
DBF4B_HUMAN	Protein DBF4 homolog B OS=Homo sapiens GN=DBF4B PE=1 SV=1	1	24.88	1097.85	2680.88	7467.09	3748.61
CSPG4_HUMAN	Chondroitin sulfate proteoglycan 4 OS=Homo sapiens GN=CSPG4 PE=1 SV=2	1	34.07	4948.05	2946.96	3344.36	3746.45
TBA8_HUMAN	Tubulin alpha-8 chain OS=Homo sapiens GN=TUBA8 PE=1 SV=1	1	324.43	2565.99	2937.53	5616.55	3706.69
MTAP_HUMAN	S-methyl-5'-thioadenosine phosphorylase OS=Homo sapiens GN=MTAP PE=1 SV=2	1	30.1	2120.57	8494.78	395.814	3670.39
SRC8_HUMAN	Src substrate cortactin OS=Homo sapiens GN=CTTN PE=1 SV=2	1	24.42	7973.69	1955.1	1062.66	3663.82
RB11A_HUMAN	Ras-related protein Rab-11A OS=Homo sapiens GN=RAB11A PE=1 SV=3	1	25.97	2332.06	4746.12	3880.19	3652.79
HORN_HUMAN	Hornerin OS=Homo sapiens GN=HRNR PE=1 SV=2	1	21.39	2276.77	7116.73	1543.9	3645.8
S10A4_HUMAN	Protein S100-A4 OS=Homo sapiens GN=S100A4 PE=1 SV=1	1	22.12	566.745	8196.41	1879.41	3547.52
PRDX5_HUMAN	Peroxiredoxin-5, mitochondrial OS=Homo sapiens GN=PRDX5 PE=1 SV=4	2	61.34	4113.5	4915.32	1534.78	3521.2
FA81B_HUMAN	Protein FAM81B OS=Homo sapiens GN=FAM81B PE=1 SV=3	1	23.02	9712.77	146.119	641.675	3500.19
TXNL1_HUMAN	Thioredoxin-like protein 1 OS=Homo sapiens GN=TXNL1 PE=1 SV=3	1	36.77	5885.89	3326.19	1172.49	3461.53
TRFM_HUMAN	Melanotransferrin OS=Homo sapiens GN=MELTF PE=1 SV=2	1	28.3	8958.58	691.241	682.268	3444.03
RCBT1_HUMAN	RCC1 and BTB domain-containing protein 1 OS=Homo sapiens GN=RCBTB1 PE=1 SV=1	1	23.99	2301.3	166.08	7799.55	3422.31
CISY_HUMAN	Citrate synthase, mitochondrial OS=Homo sapiens GN=CS PE=1 SV=2	3	106.04	5319.58	1780.05	3092.73	3397.45
WDR75_HUMAN	WD repeat-containing protein 75 OS=Homo sapiens GN=WDR75 PE=1 SV=1	1	20.6	9895.83	8.78879	273.985	3392.87
WFS1_HUMAN	Wolframin OS=Homo sapiens GN=WFS1 PE=1 SV=2	1	26.93	503.424	8326.02	1321.68	3383.71
EIF3H_HUMAN	Eukaryotic translation initiation factor 3 subunit H OS=Homo sapiens GN=EIF3H PE=1 SV=1	1	45.84	2133.51	6702.68	1313.99	3383.39
ASCC3_HUMAN	Activating signal cointegrator 1 complex subunit 3 OS=Homo sapiens GN=ASCC3 PE=1 SV=3	1	21.3	4389.85	0	5722.19	3370.68
VDAC1_HUMAN;VDAC3_HUMAN	Voltage-dependent anion-selective channel protein 1 OS=Homo sapiens GN=VDAC1 PE=1 SV=2	4	136.04	3000.5	5928.04	1139.74	3356.09
ITPR2_HUMAN	Inositol 1,4,5-trisphosphate receptor type 2 OS=Homo sapiens GN=ITPR2 PE=1 SV=2	1	22.22	2140.64	4924.15	2944.63	3336.47
PGRC2_HUMAN;PGRC1_HUMAN	Membrane-associated progesterone receptor component 2 OS=Homo sapiens GN=PGRMC2 PE=1 SV=1	2	60.97	3814.97	2615.61	3502.44	3311.01
ETFB_HUMAN	Electron transfer flavoprotein subunit beta OS=Homo sapiens GN=ETFB PE=1 SV=3	2	74.29	961.154	6769.53	2098.95	3276.54
ARSA_HUMAN	Arylsulfatase A OS=Homo sapiens GN=ARSA PE=1 SV=3	1	62.8	1420.21	6757.81	1628.76	3268.92
GDIA_HUMAN	Rab GDP dissociation inhibitor alpha OS=Homo sapiens GN=GDI1 PE=1 SV=2	1	178.8	3172.6	2442.61	4166.54	3260.58
LRC4B_HUMAN	Leucine-rich repeat-containing protein 4B OS=Homo sapiens GN=LRRC4B PE=2 SV=3	1	22.71	4372.69	0	5385.81	3252.83
CAZA2_HUMAN	F-actin-capping protein subunit alpha-2 OS=Homo sapiens GN=CAPZA2 PE=1 SV=3	1	68.65	2408.33	3425.88	3904.57	3246.26
XAGE1_HUMAN	X antigen family member 1 OS=Homo sapiens GN=XAGE1A PE=1 SV=3	1	27.46	904.324	3101.06	5728.78	3244.72
IF2G_HUMAN	Eukaryotic translation initiation factor 2 subunit 3 OS=Homo sapiens GN=EIF2S3 PE=1 SV=3	1	21.41	2846.52	4249.14	2550.5	3215.39
UB2V1_HUMAN	Ubiquitin-conjugating enzyme E2 variant 1 OS=Homo sapiens GN=UBE2V1 PE=1 SV=2	1	21.15	1208.48	3676.72	4692.69	3192.63
PLIN3_HUMAN	Perilipin-3 OS=Homo sapiens GN=PLIN3 PE=1 SV=3	1	55.95	1526.23	6025.05	1962.37	3171.22
DDX17_HUMAN;DDX5_HUMAN	Probable ATP-dependent RNA helicase DDX17 OS=Homo sapiens GN=DDX17 PE=1 SV=2	2	70.75	2663.19	3774.56	3000.14	3145.97
RL13_HUMAN	60S ribosomal protein L13 OS=Homo sapiens GN=RPL13 PE=1 SV=4	2	66.27	3114.39	4077.44	2224.74	3138.86
NUCB2_HUMAN	Nucleobindin-2 OS=Homo sapiens GN=NUCB2 PE=1 SV=2	1	29.7	498.143	7389.78	1515.72	3134.55
RPN1_HUMAN	Dolichyl-diphosphooligosaccharide--protein glycosyltransferase subunit 1 OS=Homo sapiens GN=RPN1 PE=1 SV=1	2	70.18	3117.19	3564.03	2590.77	3090.66
AIFM1_HUMAN	Apoptosis-inducing factor 1, mitochondrial OS=Homo sapiens GN=AIFM1 PE=1 SV=1	2	58.28	2282.08	3610.08	3274.39	3055.52
PP2AA_HUMAN	Serine/threonine-protein phosphatase 2A catalytic subunit alpha isoform OS=Homo sapiens GN=PPP2CA PE=1 SV=1	1	23.85	2562.2	6072.35	446.671	3027.07
TSP3_HUMAN	Thrombospondin-3 OS=Homo sapiens GN=THBS3 PE=1 SV=1	2	136.47	2183.62	4981.38	1890.54	3018.51
NCOR1_HUMAN	Nuclear receptor corepressor 1 OS=Homo sapiens GN=NCOR1 PE=1 SV=2	1	27.26	1937.28	3827.33	3149.58	2971.39
HID1_HUMAN	Protein HID1 OS=Homo sapiens GN=HID1 PE=1 SV=1	1	40.4	4072.28	3291.73	1482.65	2948.88
AK1C1_HUMAN;AK1C2_HUMAN;AK1D1_HUMAN	Aldo-keto reductase family 1 member C1 OS=Homo sapiens GN=AKR1C1 PE=1 SV=1	2	68.35	5232.21	2188.58	1301.19	2907.33
DBNL_HUMAN	Drebrin-like protein OS=Homo sapiens GN=DBNL PE=1 SV=1	1	62.56	1902.46	4073.52	2693.2	2889.73
NOV_HUMAN	Protein NOV homolog OS=Homo sapiens GN=NOV PE=1 SV=1	3	169.82	4094.93	689.797	3832.03	2872.25
CPNE3_HUMAN;CPNE2_HUMAN	Copine-3 OS=Homo sapiens GN=CPNE3 PE=1 SV=1	2	70.08	2204.14	3173.71	3163.2	2847.02
OAF_HUMAN	Out at first protein homolog OS=Homo sapiens GN=OAF PE=2 SV=1	1	40.72	3080.27	2970.94	2354.51	2801.9
EIF3F_HUMAN	Eukaryotic translation initiation factor 3 subunit F OS=Homo sapiens GN=EIF3F PE=1 SV=1	1	41.13	3200.14	3506.83	1670.09	2792.35
MMP14_HUMAN	Matrix metalloproteinase-14 OS=Homo sapiens GN=MMP14 PE=1 SV=3	1	46.39	2930.23	1594.78	3834.53	2786.51
BACH_HUMAN	Cytosolic acyl coenzyme A thioester hydrolase OS=Homo sapiens GN=ACOT7 PE=1 SV=3	1	20.49	2528.65	3009.39	2777.58	2771.87
SYRC_HUMAN	Arginine--tRNA ligase, cytoplasmic OS=Homo sapiens GN=RARS PE=1 SV=2	1	23.05	1765.27	1833.94	4670.29	2756.5
GSTO1_HUMAN	Glutathione S-transferase omega-1 OS=Homo sapiens GN=GSTO1 PE=1 SV=2	1	32.85	3152.93	0	5059.42	2737.45
PLBL2_HUMAN	Putative phospholipase B-like 2 OS=Homo sapiens GN=PLBD2 PE=1 SV=2	4	127.26	3129.1	1961.53	3098.84	2729.83
ADAM9_HUMAN	Disintegrin and metalloproteinase domain-containing protein 9 OS=Homo sapiens GN=ADAM9 PE=1 SV=1	1	28.61	2230.59	4654.64	1296.1	2727.11
SLIT1_HUMAN	Slit homolog 1 protein OS=Homo sapiens GN=SLIT1 PE=2 SV=4	1	30.11	7822.44	67.3941	285.988	2725.28
NOE1_HUMAN	Noelin OS=Homo sapiens GN=OLFM1 PE=1 SV=4	1	36.53	1761.73	395.76	5851.54	2669.67
PSG4_HUMAN;PSG11_HUMAN	Pregnancy-specific beta-1-glycoprotein 4 OS=Homo sapiens GN=PSG4 PE=2 SV=3	2	261.38	2032.2	1822.6	4152.78	2669.19
GPC6_HUMAN	Glypican-6 OS=Homo sapiens GN=GPC6 PE=1 SV=1	2	65.61	1704.79	2847.11	3375.8	2642.57
CLAT_HUMAN	Choline O-acetyltransferase OS=Homo sapiens GN=CHAT PE=1 SV=4	1	23.42	4296.71	0	3582.93	2626.55
GRAK_HUMAN	Granzyme K OS=Homo sapiens GN=GZMK PE=1 SV=1	1	23.03	7794.87	19.0931	12.8923	2608.95
CNN3_HUMAN	Calponin-3 OS=Homo sapiens GN=CNN3 PE=1 SV=1	1	32.24	7349.92	0	398.667	2582.86
RAB10_HUMAN;RAB12_HUMAN;RAB13_HUMAN;RAB15_HUMAN;RAB43_HUMAN	Ras-related protein Rab-10 OS=Homo sapiens GN=RAB10 PE=1 SV=1	3	149.82	3687.43	698.233	3253.78	2546.48
PROS_HUMAN	Vitamin K-dependent protein S OS=Homo sapiens GN=PROS1 PE=1 SV=1	2	68.21	1974.42	4594.38	1057.46	2542.09
VAV3_HUMAN	Guanine nucleotide exchange factor VAV3 OS=Homo sapiens GN=VAV3 PE=1 SV=1	1	22.13	1211.86	2891.53	3146.16	2416.52
LAMA1_HUMAN;LAMA2_HUMAN	Laminin subunit alpha-1 OS=Homo sapiens GN=LAMA1 PE=1 SV=2	2	69.58	3966.91	2675.95	605.27	2416.04
CRIPT_HUMAN	Cysteine-rich PDZ-binding protein OS=Homo sapiens GN=CRIPT PE=1 SV=1	1	26.12	3078.75	1305.01	2863.17	2415.64
HINT1_HUMAN	Histidine triad nucleotide-binding protein 1 OS=Homo sapiens GN=HINT1 PE=1 SV=2	1	25.73	1732.42	3663.07	1846.53	2414.01
SYAC_HUMAN	Alanine--tRNA ligase, cytoplasmic OS=Homo sapiens GN=AARS PE=1 SV=2	1	27.16	2197.73	2126.76	2888.16	2404.22
LSM10_HUMAN	U7 snRNA-associated Sm-like protein LSm10 OS=Homo sapiens GN=LSM10 PE=1 SV=1	1	22.56	1013.01	5988.2	64.1093	2355.1
LRC40_HUMAN	Leucine-rich repeat-containing protein 40 OS=Homo sapiens GN=LRRC40 PE=1 SV=1	1	35.78	6937.84	0	0	2312.61
CRLF1_HUMAN	Cytokine receptor-like factor 1 OS=Homo sapiens GN=CRLF1 PE=1 SV=1	2	87.52	4642.03	1014.36	1255.55	2303.98
WNT7B_HUMAN	Protein Wnt-7b OS=Homo sapiens GN=WNT7B PE=2 SV=2	1	33.57	883.8	4340.16	1665.76	2296.58
ZN462_HUMAN	Zinc finger protein 462 OS=Homo sapiens GN=ZNF462 PE=1 SV=3	1	26.25	506.603	2438.49	3868.82	2271.3
MYPT1_HUMAN	Protein phosphatase 1 regulatory subunit 12A OS=Homo sapiens GN=PPP1R12A PE=1 SV=1	1	50.24	2218.55	2833.81	1707.39	2253.25
RL7A_HUMAN	60S ribosomal protein L7a OS=Homo sapiens GN=RPL7A PE=1 SV=2	1	38.5	1690.49	2036.07	3007.55	2244.7
PRDM1_HUMAN	PR domain zinc finger protein 1 OS=Homo sapiens GN=PRDM1 PE=1 SV=2	1	25.41	1559.88	7.80778	5153.33	2240.34
ITIH4_HUMAN	Inter-alpha-trypsin inhibitor heavy chain H4 OS=Homo sapiens GN=ITIH4 PE=1 SV=4	1	29.23	363.334	0	6341.15	2234.83
LAMA5_HUMAN	Laminin subunit alpha-5 OS=Homo sapiens GN=LAMA5 PE=1 SV=8	1	75.21	2021.32	1297.67	3322.13	2213.71
ITIH1_HUMAN	Inter-alpha-trypsin inhibitor heavy chain H1 OS=Homo sapiens GN=ITIH1 PE=1 SV=3	1	70.71	3028.12	125.797	3410.03	2187.98
HNRH3_HUMAN	Heterogeneous nuclear ribonucleoprotein H3 OS=Homo sapiens GN=HNRNPH3 PE=1 SV=2	1	33.86	1817.65	3100.98	1622.67	2180.43
FHR2_HUMAN	Complement factor H-related protein 2 OS=Homo sapiens GN=CFHR2 PE=1 SV=1	1	24.32	841.851	4044.28	1637.91	2174.68
RL18_HUMAN	60S ribosomal protein L18 OS=Homo sapiens GN=RPL18 PE=1 SV=2	1	49.42	1039.22	5130.1	343.825	2171.05
PDGFC_HUMAN	Platelet-derived growth factor C OS=Homo sapiens GN=PDGFC PE=1 SV=2	1	57.86	1624.79	616.774	4250.85	2164.14
OLA1_HUMAN	Obg-like ATPase 1 OS=Homo sapiens GN=OLA1 PE=1 SV=2	2	66.16	2645.01	1652.56	2154.67	2150.74
TCTP_HUMAN	Translationally-controlled tumor protein OS=Homo sapiens GN=TPT1 PE=1 SV=1	1	21.16	2746.02	1989.13	1674.71	2136.62
SAS6_HUMAN	Spindle assembly abnormal protein 6 homolog OS=Homo sapiens GN=SASS6 PE=1 SV=1	1	43.4	412.715	5026.95	830.272	2089.98
APOH_HUMAN	Beta-2-glycoprotein 1 OS=Homo sapiens GN=APOH PE=1 SV=3	1	38.05	1257.84	1145.24	3842.14	2081.74
SND1_HUMAN	Staphylococcal nuclease domain-containing protein 1 OS=Homo sapiens GN=SND1 PE=1 SV=1	1	44.45	3590.08	1759.36	867.944	2072.46
ANXA4_HUMAN	Annexin A4 OS=Homo sapiens GN=ANXA4 PE=1 SV=4	1	69.59	1730.22	2770.94	1589.08	2030.08
MTG2_HUMAN	Mitochondrial ribosome-associated GTPase 2 OS=Homo sapiens GN=MTG2 PE=1 SV=1	1	22.55	940.169	2525.48	2578.03	2014.56
BC11B_HUMAN	B-cell lymphoma/leukemia 11B OS=Homo sapiens GN=BCL11B PE=1 SV=1	2	41.29	1841.65	2714.18	1385.52	1980.45
KCC2D_HUMAN	Calcium/calmodulin-dependent protein kinase type II subunit delta OS=Homo sapiens GN=CAMK2D PE=1 SV=3	1	57.67	1736.82	2293.33	1907.9	1979.35
TPM3_HUMAN;TPM1_HUMAN	Tropomyosin alpha-3 chain OS=Homo sapiens GN=TPM3 PE=1 SV=2	1	104.02	789.125	757.559	4372.24	1972.98
AAAT_HUMAN	Neutral amino acid transporter B(0) OS=Homo sapiens GN=SLC1A5 PE=1 SV=2	2	88.52	1090.26	2198.29	2500.19	1929.58
CLCF1_HUMAN	Cardiotrophin-like cytokine factor 1 OS=Homo sapiens GN=CLCF1 PE=1 SV=1	1	21.61	1453.05	0	4271.61	1908.22
TICN1_HUMAN	Testican-1 OS=Homo sapiens GN=SPOCK1 PE=1 SV=1	1	43.33	91.1318	5358.78	237.003	1895.64
F13A_HUMAN	Coagulation factor XIII A chain OS=Homo sapiens GN=F13A1 PE=1 SV=4	1	41.85	1958.53	907.583	2819.91	1895.34
MYOF_HUMAN	Myoferlin OS=Homo sapiens GN=MYOF PE=1 SV=1	2	57.14	1980.07	1817.56	1879.44	1892.36
HNRDL_HUMAN	Heterogeneous nuclear ribonucleoprotein D-like OS=Homo sapiens GN=HNRNPDL PE=1 SV=3	1	137.52	1507.65	2297.43	1802.6	1869.23
NOP56_HUMAN	Nucleolar protein 56 OS=Homo sapiens GN=NOP56 PE=1 SV=4	1	20.99	2197.16	638.269	2740.88	1858.77
PSD11_HUMAN	26S proteasome non-ATPase regulatory subunit 11 OS=Homo sapiens GN=PSMD11 PE=1 SV=3	1	29.64	1218.9	3474.41	879.322	1857.54
SNX9_HUMAN	Sorting nexin-9 OS=Homo sapiens GN=SNX9 PE=1 SV=1	1	48.56	2543.28	1565.41	1421.21	1843.3
NAGK_HUMAN	N-acetyl-D-glucosamine kinase OS=Homo sapiens GN=NAGK PE=1 SV=4	1	66.91	649.845	3362.7	1508.12	1840.22
PCKGM_HUMAN	Phosphoenolpyruvate carboxykinase [GTP], mitochondrial OS=Homo sapiens GN=PCK2 PE=1 SV=3	2	62.65	2094.05	2867.62	550.061	1837.25
KINH_HUMAN	Kinesin-1 heavy chain OS=Homo sapiens GN=KIF5B PE=1 SV=1	1	61.04	0	5252.06	203.397	1818.49
ADCL2_HUMAN	Arylacetamide deacetylase-like 2 OS=Homo sapiens GN=AADACL2 PE=2 SV=3	1	21.65	1164.81	186.875	4095.95	1815.88
SBDS_HUMAN	Ribosome maturation protein SBDS OS=Homo sapiens GN=SBDS PE=1 SV=4	1	50.95	330.466	572.19	4453.76	1785.47
KLH21_HUMAN	Kelch-like protein 21 OS=Homo sapiens GN=KLHL21 PE=1 SV=4	1	23.98	1661.95	925.384	2709.33	1765.56
MFAP4_HUMAN	Microfibril-associated glycoprotein 4 OS=Homo sapiens GN=MFAP4 PE=1 SV=2	3	138.46	62.043	4640.84	541.792	1748.23
HMGA1_HUMAN	High mobility group protein HMG-I/HMG-Y OS=Homo sapiens GN=HMGA1 PE=1 SV=3	1	30.16	2825.22	1308.15	1090.81	1741.39
P4HA1_HUMAN	Prolyl 4-hydroxylase subunit alpha-1 OS=Homo sapiens GN=P4HA1 PE=1 SV=2	1	47.87	336.072	1424.65	3431.22	1730.65
MOXD1_HUMAN	DBH-like monooxygenase protein 1 OS=Homo sapiens GN=MOXD1 PE=1 SV=1	1	23.32	3091.73	820.968	1247.47	1720.06
ATX2_HUMAN	Ataxin-2 OS=Homo sapiens GN=ATXN2 PE=1 SV=2	1	27.77	3262.88	525.878	1346.35	1711.7
GBB4_HUMAN	Guanine nucleotide-binding protein subunit beta-4 OS=Homo sapiens GN=GNB4 PE=1 SV=3	1	73.57	578.558	4538.07	0	1705.54
MRP2_HUMAN	Canalicular multispecific organic anion transporter 1 OS=Homo sapiens GN=ABCC2 PE=1 SV=3	1	25.26	4836.91	0	278.771	1705.23
CYBP_HUMAN	Calcyclin-binding protein OS=Homo sapiens GN=CACYBP PE=1 SV=2	1	21.04	876.92	2488.83	1748.2	1704.65
CRTC3_HUMAN	CREB-regulated transcription coactivator 3 OS=Homo sapiens GN=CRTC3 PE=1 SV=2	1	21.82	1126.66	5.81036	3976.45	1702.97
APOL2_HUMAN	Apolipoprotein L2 OS=Homo sapiens GN=APOL2 PE=1 SV=1	2	80.66	1101.48	2833.25	1155.27	1696.67
VASP_HUMAN	Vasodilator-stimulated phosphoprotein OS=Homo sapiens GN=VASP PE=1 SV=3	1	40.25	1680.45	2685.95	711.873	1692.76
FIBIN_HUMAN	Fin bud initiation factor homolog OS=Homo sapiens GN=FIBIN PE=1 SV=1	1	29.08	1236.61	2642.83	1082.63	1654.02
ILEU_HUMAN	Leukocyte elastase inhibitor OS=Homo sapiens GN=SERPINB1 PE=1 SV=1	1	32.87	3812.32	0	1078.89	1630.4
IMDH2_HUMAN	Inosine-5'-monophosphate dehydrogenase 2 OS=Homo sapiens GN=IMPDH2 PE=1 SV=2	1	29.09	1759.19	843.182	2251.74	1618.04
MET16_HUMAN	U6 small nuclear RNA (adenine-(43)-N(6))-methyltransferase OS=Homo sapiens GN=METTL16 PE=1 SV=2	1	27.27	2843.3	304.353	1685.31	1610.99
SNIP1_HUMAN	Smad nuclear-interacting protein 1 OS=Homo sapiens GN=SNIP1 PE=1 SV=1	1	23.24	1074.93	1225.89	2527.98	1609.6
TTLL5_HUMAN	Tubulin polyglutamylase TTLL5 OS=Homo sapiens GN=TTLL5 PE=1 SV=3	1	25.92	23.6341	3788.72	999.638	1604
ZCH13_HUMAN	Zinc finger CCHC domain-containing protein 13 OS=Homo sapiens GN=ZCCHC13 PE=1 SV=1	1	26.47	1563.69	440.949	2774.25	1592.96
LNX1_HUMAN	E3 ubiquitin-protein ligase LNX OS=Homo sapiens GN=LNX1 PE=1 SV=1	1	20.71	259.416	0	4316.73	1525.38
DDR1_HUMAN	Epithelial discoidin domain-containing receptor 1 OS=Homo sapiens GN=DDR1 PE=1 SV=1	1	44.78	1646.35	1609.22	1244.42	1500
RECQ1_HUMAN	ATP-dependent DNA helicase Q1 OS=Homo sapiens GN=RECQL PE=1 SV=3	1	20.26	2563.8	500.773	1263.73	1442.77
PSA4_HUMAN	Proteasome subunit alpha type-4 OS=Homo sapiens GN=PSMA4 PE=1 SV=1	1	21.08	657.513	991.609	2643.08	1430.73
TEAD3_HUMAN	Transcriptional enhancer factor TEF-5 OS=Homo sapiens GN=TEAD3 PE=1 SV=2	1	21.81	0	7.26873	4281.48	1429.58
RL10A_HUMAN	60S ribosomal protein L10a OS=Homo sapiens GN=RPL10A PE=1 SV=2	1	47.47	1233.57	1638.15	1346.81	1406.18
NEUR1_HUMAN	Sialidase-1 OS=Homo sapiens GN=NEU1 PE=1 SV=1	2	105.32	329.35	2569.87	1297.44	1398.89
RHOA_HUMAN;RHOC_HUMAN	Transforming protein RhoA OS=Homo sapiens GN=RHOA PE=1 SV=1	2	57.97	432.599	561.419	3187.42	1393.81
ATL1_HUMAN	ADAMTS-like protein 1 OS=Homo sapiens GN=ADAMTSL1 PE=1 SV=4	1	35.14	1081.34	1078.09	2007.83	1389.09
CRYL1_HUMAN	Lambda-crystallin homolog OS=Homo sapiens GN=CRYL1 PE=1 SV=3	1	23.62	0	227.244	3923.15	1383.47
CD151_HUMAN	CD151 antigen OS=Homo sapiens GN=CD151 PE=1 SV=3	1	20.08	1441.22	2093.38	539.513	1358.04
ENAM_HUMAN	Enamelin OS=Homo sapiens GN=ENAM PE=1 SV=3	1	27.68	3365.7	707.688	0.0694803	1357.82
CPNE1_HUMAN	Copine-1 OS=Homo sapiens GN=CPNE1 PE=1 SV=1	2	79.69	1495.59	2068.83	458.453	1340.96
RS23_HUMAN	40S ribosomal protein S23 OS=Homo sapiens GN=RPS23 PE=1 SV=3	1	38.29	1140.43	2424.42	451.72	1338.86
ADCK1_HUMAN	Uncharacterized aarF domain-containing protein kinase 1 OS=Homo sapiens GN=ADCK1 PE=2 SV=2	1	23.2	1604.82	364.755	2043.45	1337.67
OR4L1_HUMAN	Olfactory receptor 4L1 OS=Homo sapiens GN=OR4L1 PE=3 SV=1	1	29.87	1449.3	129.855	2401.12	1326.76
RL24_HUMAN	60S ribosomal protein L24 OS=Homo sapiens GN=RPL24 PE=1 SV=1	1	30.33	0	3591.87	362.065	1317.98
PPCE_HUMAN	Prolyl endopeptidase OS=Homo sapiens GN=PREP PE=1 SV=2	1	32.5	1305.22	1272.42	1322.33	1299.99
FAM3C_HUMAN	Protein FAM3C OS=Homo sapiens GN=FAM3C PE=1 SV=1	1	42.45	1136.42	111.68	2574.05	1274.05
CLN5_HUMAN	Ceroid-lipofuscinosis neuronal protein 5 OS=Homo sapiens GN=CLN5 PE=1 SV=2	1	23.96	1759.81	0	2001.59	1253.8
E41L2_HUMAN	Band 4.1-like protein 2 OS=Homo sapiens GN=EPB41L2 PE=1 SV=1	1	26.69	966.866	1692.97	1016.95	1225.59
TPC1_HUMAN	Two pore calcium channel protein 1 OS=Homo sapiens GN=TPCN1 PE=1 SV=3	1	22.46	3654.54	0	0	1218.18
IF4G2_HUMAN	Eukaryotic translation initiation factor 4 gamma 2 OS=Homo sapiens GN=EIF4G2 PE=1 SV=1	1	31.88	1450.12	358.403	1837.39	1215.3
DDAH1_HUMAN	N(G),N(G)-dimethylarginine dimethylaminohydrolase 1 OS=Homo sapiens GN=DDAH1 PE=1 SV=3	1	21.69	692.419	2460.85	383.229	1178.83
SPSY_HUMAN	Spermine synthase OS=Homo sapiens GN=SMS PE=1 SV=2	1	34.37	772.38	1777	955.528	1168.3
OLFL1_HUMAN	Olfactomedin-like protein 1 OS=Homo sapiens GN=OLFML1 PE=1 SV=2	1	72.39	1440.48	1829.53	218.927	1162.98
PUR6_HUMAN	Multifunctional protein ADE2 OS=Homo sapiens GN=PAICS PE=1 SV=3	2	99.45	891.742	1439.51	1157.13	1162.8
AP2A1_HUMAN	AP-2 complex subunit alpha-1 OS=Homo sapiens GN=AP2A1 PE=1 SV=3	1	24.99	67.8806	3096.58	307.815	1157.43
CA123_HUMAN	UPF0587 protein C1orf123 OS=Homo sapiens GN=C1orf123 PE=1 SV=1	1	37.66	278.963	1601.1	1565.65	1148.57
ZFR2_HUMAN	Zinc finger RNA-binding protein 2 OS=Homo sapiens GN=ZFR2 PE=2 SV=3	1	24.21	291.41	648.075	2464.44	1134.64
AMBP_HUMAN	Protein AMBP OS=Homo sapiens GN=AMBP PE=1 SV=1	1	23.89	1442.07	195.128	1736.86	1124.69
LAMP1_HUMAN	Lysosome-associated membrane glycoprotein 1 OS=Homo sapiens GN=LAMP1 PE=1 SV=3	3	125.07	3014.63	30.0432	196.915	1080.53
OR2B3_HUMAN	Putative olfactory receptor 2B3 OS=Homo sapiens GN=OR2B3 PE=3 SV=1	1	23.74	331.971	43.5505	2836.74	1070.75
ERP29_HUMAN	Endoplasmic reticulum resident protein 29 OS=Homo sapiens GN=ERP29 PE=1 SV=4	1	41.55	0	3205.64	0	1068.55
SEPT7_HUMAN;SEP14_HUMAN	Septin-7 OS=Homo sapiens GN=SEPT7 PE=1 SV=2	1	91.57	1077.78	346.446	1764.25	1062.82
ESYT1_HUMAN	Extended synaptotagmin-1 OS=Homo sapiens GN=ESYT1 PE=1 SV=1	2	60.77	549.373	1649.4	978.038	1058.94
ETHE1_HUMAN	Persulfide dioxygenase ETHE1, mitochondrial OS=Homo sapiens GN=ETHE1 PE=1 SV=2	1	52.69	2077.51	1098.07	0	1058.53
PA1B2_HUMAN	Platelet-activating factor acetylhydrolase IB subunit beta OS=Homo sapiens GN=PAFAH1B2 PE=1 SV=1	1	40.62	246.66	2895.41	0	1047.36
CXL17_HUMAN	C-X-C motif chemokine 17 OS=Homo sapiens GN=CXCL17 PE=1 SV=1	1	30.83	3122.94	0	0	1040.98
GFPT1_HUMAN	Glutamine--fructose-6-phosphate aminotransferase [isomerizing] 1 OS=Homo sapiens GN=GFPT1 PE=1 SV=3	1	30.34	1077.64	1742.61	288.305	1036.18
PTPRG_HUMAN	Receptor-type tyrosine-protein phosphatase gamma OS=Homo sapiens GN=PTPRG PE=1 SV=4	1	33.77	2625.77	476.917	0	1034.23
DYH1_HUMAN	Dynein heavy chain 1, axonemal OS=Homo sapiens GN=DNAH1 PE=1 SV=4	1	35.84	935.11	570.569	1534.1	1013.26
B4GT4_HUMAN	Beta-1,4-galactosyltransferase 4 OS=Homo sapiens GN=B4GALT4 PE=1 SV=1	1	28.43	914.921	14.6131	2093.09	1007.54
PLCD4_HUMAN	1-phosphatidylinositol 4,5-bisphosphate phosphodiesterase delta-4 OS=Homo sapiens GN=PLCD4 PE=2 SV=1	1	24.36	2794.15	0	211.772	1001.97
CRCC2_HUMAN	Putative ciliary rootlet coiled-coil protein 2 OS=Homo sapiens GN=CROCC2 PE=5 SV=3	1	25.45	1497.79	0	1467.88	988.555
AL7A1_HUMAN	Alpha-aminoadipic semialdehyde dehydrogenase OS=Homo sapiens GN=ALDH7A1 PE=1 SV=5	1	20.18	0	2630.83	296.97	975.932
SMYD5_HUMAN	SET and MYND domain-containing protein 5 OS=Homo sapiens GN=SMYD5 PE=1 SV=2	1	21.81	331.011	583.52	1986.25	966.926
RS7_HUMAN	40S ribosomal protein S7 OS=Homo sapiens GN=RPS7 PE=1 SV=1	1	47.77	444.169	1144.51	1279.48	956.053
TETN_HUMAN	Tetranectin OS=Homo sapiens GN=CLEC3B PE=1 SV=3	1	23.01	576.342	1660.72	607.39	948.151
PCD18_HUMAN	Protocadherin-18 OS=Homo sapiens GN=PCDH18 PE=2 SV=3	1	24.1	1370.96	1088.86	372.407	944.075
EST1A_HUMAN	Telomerase-binding protein EST1A OS=Homo sapiens GN=SMG6 PE=1 SV=2	1	22.49	2820.93	0	0	940.31
PVR_HUMAN	Poliovirus receptor OS=Homo sapiens GN=PVR PE=1 SV=2	1	24.22	731.716	1406.76	679.086	939.187
ETFA_HUMAN	Electron transfer flavoprotein subunit alpha, mitochondrial OS=Homo sapiens GN=ETFA PE=1 SV=1	1	44.82	1317.63	50.071	1430.05	932.583
RBBP4_HUMAN	Histone-binding protein RBBP4 OS=Homo sapiens GN=RBBP4 PE=1 SV=3	1	38.2	1549.03	206.908	1040.6	932.179
FBX42_HUMAN	F-box only protein 42 OS=Homo sapiens GN=FBXO42 PE=1 SV=1	1	37.07	2605.88	0	153.302	919.728
MXRA7_HUMAN	Matrix-remodeling-associated protein 7 OS=Homo sapiens GN=MXRA7 PE=1 SV=1	1	28.08	1830.8	920.043	0	916.946
GLYM_HUMAN	Serine hydroxymethyltransferase, mitochondrial OS=Homo sapiens GN=SHMT2 PE=1 SV=3	1	21.15	980.852	1164.56	603.812	916.408
MK13_HUMAN	Mitogen-activated protein kinase 13 OS=Homo sapiens GN=MAPK13 PE=1 SV=1	1	27.49	2237.87	330.468	165.114	911.15
TIGAR_HUMAN	Fructose-2,6-bisphosphatase TIGAR OS=Homo sapiens GN=TIGAR PE=1 SV=1	1	23.96	1145.29	600.966	953.295	899.851
ADK_HUMAN	Adenosine kinase OS=Homo sapiens GN=ADK PE=1 SV=2	1	25.84	0	2549.74	62.6644	870.803
MSH3_HUMAN	DNA mismatch repair protein Msh3 OS=Homo sapiens GN=MSH3 PE=1 SV=4	1	23.27	2611.04	0	0	870.346
RL14_HUMAN	60S ribosomal protein L14 OS=Homo sapiens GN=RPL14 PE=1 SV=4	1	70.12	208.059	1082.87	1288.68	859.869
FIBB_HUMAN	Fibrinogen beta chain OS=Homo sapiens GN=FGB PE=1 SV=2	1	31.12	701.431	1070.79	765.673	845.964
ANGL4_HUMAN	Angiopoietin-related protein 4 OS=Homo sapiens GN=ANGPTL4 PE=1 SV=2	1	30.15	944.898	1101.77	478.707	841.791
CRK_HUMAN	Adapter molecule crk OS=Homo sapiens GN=CRK PE=1 SV=2	1	66.25	992.339	405.346	1101.09	832.926
CAV1_HUMAN	Caveolin-1 OS=Homo sapiens GN=CAV1 PE=1 SV=4	1	32.2	2415.19	0	26.235	813.81
IPO5_HUMAN	Importin-5 OS=Homo sapiens GN=IPO5 PE=1 SV=4	1	27.05	4.51457	2350.09	21.2215	791.941
SQOR_HUMAN	Sulfide:quinone oxidoreductase, mitochondrial OS=Homo sapiens GN=SQOR PE=1 SV=1	1	49.84	885.173	724.147	750.078	786.466
BASI_HUMAN	Basigin OS=Homo sapiens GN=BSG PE=1 SV=2	1	33.48	368.833	501.984	1418.92	763.246
ASPG_HUMAN	N(4)-(beta-N-acetylglucosaminyl)-L-asparaginase OS=Homo sapiens GN=AGA PE=1 SV=2	1	48.89	1020.36	201.758	991.397	737.84
RGMB_HUMAN	RGM domain family member B OS=Homo sapiens GN=RGMB PE=1 SV=3	1	26.52	247.435	1439.29	492.19	726.306
SEM3C_HUMAN	Semaphorin-3C OS=Homo sapiens GN=SEMA3C PE=2 SV=2	1	33.29	0	2106.97	0	702.324
FGF2_HUMAN	Fibroblast growth factor 2 OS=Homo sapiens GN=FGF2 PE=1 SV=3	1	23.82	735.492	349.148	948.891	677.844
CH3L1_HUMAN	Chitinase-3-like protein 1 OS=Homo sapiens GN=CHI3L1 PE=1 SV=2	1	22.85	0	1838.92	145.723	661.549
SIR6_HUMAN	NAD-dependent protein deacetylase sirtuin-6 OS=Homo sapiens GN=SIRT6 PE=1 SV=2	1	34.49	6.86505	1380.75	573.489	653.701
CLU_HUMAN	Clustered mitochondria protein homolog OS=Homo sapiens GN=CLUH PE=1 SV=2	1	21.99	343.456	84.9868	1513.19	647.211
NAGAB_HUMAN	Alpha-N-acetylgalactosaminidase OS=Homo sapiens GN=NAGA PE=1 SV=2	1	36	0	941.114	986.183	642.432
TARSH_HUMAN	Target of Nesh-SH3 OS=Homo sapiens GN=ABI3BP PE=1 SV=1	1	29.4	260.915	89.6625	1412.66	587.744
LPAR1_HUMAN	Lysophosphatidic acid receptor 1 OS=Homo sapiens GN=LPAR1 PE=1 SV=3	1	54.32	326.586	0	1414.11	580.23
RET4_HUMAN	Retinol-binding protein 4 OS=Homo sapiens GN=RBP4 PE=1 SV=3	2	62.33	358.517	809.263	546.438	571.406
ASNA_HUMAN	ATPase ASNA1 OS=Homo sapiens GN=ASNA1 PE=1 SV=2	1	24.67	919.283	80.2003	685.01	561.498
PP1A_HUMAN	Serine/threonine-protein phosphatase PP1-alpha catalytic subunit OS=Homo sapiens GN=PPP1CA PE=1 SV=1	2	65.84	1320.44	230.551	121.33	557.439
RALYL_HUMAN;RALY_HUMAN	RNA-binding Raly-like protein OS=Homo sapiens GN=RALYL PE=1 SV=2	1	38.21	1476.71	147.821	0	541.51
MSH2_HUMAN	DNA mismatch repair protein Msh2 OS=Homo sapiens GN=MSH2 PE=1 SV=1	1	24.19	290.58	653.816	636.948	527.115
1B44_HUMAN	HLA class I histocompatibility antigen, B-44 alpha chain OS=Homo sapiens GN=HLA-B PE=1 SV=1	1	215.07	86.3787	1343.77	114.054	514.734
FBXW8_HUMAN	F-box/WD repeat-containing protein 8 OS=Homo sapiens GN=FBXW8 PE=1 SV=2	1	24.08	322.351	206.326	1015.48	514.718
THIM_HUMAN	3-ketoacyl-CoA thiolase, mitochondrial OS=Homo sapiens GN=ACAA2 PE=1 SV=2	1	41.4	928.342	259.375	355.011	514.243
AKA12_HUMAN	A-kinase anchor protein 12 OS=Homo sapiens GN=AKAP12 PE=1 SV=4	1	30.22	0	1006.67	495.939	500.871
RAB2A_HUMAN	Ras-related protein Rab-2A OS=Homo sapiens GN=RAB2A PE=1 SV=1	1	24.13	461.628	547.123	483.587	497.446
NDKA_HUMAN	Nucleoside diphosphate kinase A OS=Homo sapiens GN=NME1 PE=1 SV=1	1	51.03	739.471	0	745.481	494.984
S4A5_HUMAN	Electrogenic sodium bicarbonate cotransporter 4 OS=Homo sapiens GN=SLC4A5 PE=2 SV=2	1	26.57	585.515	400.183	482.153	489.284
CC136_HUMAN	Coiled-coil domain-containing protein 136 OS=Homo sapiens GN=CCDC136 PE=1 SV=3	1	23.69	322.631	906.734	218.625	482.663
THIL_HUMAN	Acetyl-CoA acetyltransferase, mitochondrial OS=Homo sapiens GN=ACAT1 PE=1 SV=1	1	58.06	551.697	680.67	207.463	479.943
DECR_HUMAN	2,4-dienoyl-CoA reductase, mitochondrial OS=Homo sapiens GN=DECR1 PE=1 SV=1	1	35.83	244.008	968.863	226.028	479.633
LMNB2_HUMAN	Lamin-B2 OS=Homo sapiens GN=LMNB2 PE=1 SV=4	1	106.18	1039.05	0	389.307	476.118
C1QT3_HUMAN	Complement C1q tumor necrosis factor-related protein 3 OS=Homo sapiens GN=C1QTNF3 PE=1 SV=1	2	64.63	404.079	27.9527	954.056	462.029
BIEA_HUMAN	Biliverdin reductase A OS=Homo sapiens GN=BLVRA PE=1 SV=2	1	37.59	106.67	1101.57	174.334	460.859
BTAF1_HUMAN	TATA-binding protein-associated factor 172 OS=Homo sapiens GN=BTAF1 PE=1 SV=2	1	34.1	998.284	0	334.982	444.422
LKHA4_HUMAN	Leukotriene A-4 hydrolase OS=Homo sapiens GN=LTA4H PE=1 SV=2	1	26.81	769.349	361.903	198.451	443.234
TTI2_HUMAN	TELO2-interacting protein 2 OS=Homo sapiens GN=TTI2 PE=1 SV=1	1	21.67	71.9352	1060.14	188.45	440.175
QCR1_HUMAN	Cytochrome b-c1 complex subunit 1, mitochondrial OS=Homo sapiens GN=UQCRC1 PE=1 SV=3	1	24.1	367.316	568.677	377.174	437.722
DFNA5_HUMAN	Non-syndromic hearing impairment protein 5 OS=Homo sapiens GN=DFNA5 PE=1 SV=2	1	36.25	601.476	0	704.118	435.198
SF3B2_HUMAN	Splicing factor 3B subunit 2 OS=Homo sapiens GN=SF3B2 PE=1 SV=2	1	32.88	0	1284.73	0	428.245
PSD12_HUMAN	26S proteasome non-ATPase regulatory subunit 12 OS=Homo sapiens GN=PSMD12 PE=1 SV=3	1	62.12	108.553	1152.05	0.470081	420.358
ASM3A_HUMAN	Acid sphingomyelinase-like phosphodiesterase 3a OS=Homo sapiens GN=SMPDL3A PE=1 SV=2	1	23.09	642.362	572.477	0	404.946
PUR9_HUMAN	Bifunctional purine biosynthesis protein PURH OS=Homo sapiens GN=ATIC PE=1 SV=3	1	53.38	544.569	389.474	266.284	400.109
SYLM_HUMAN	Probable leucine--tRNA ligase, mitochondrial OS=Homo sapiens GN=LARS2 PE=1 SV=2	1	22.4	783.413	248.99	0	344.134
SARDH_HUMAN	Sarcosine dehydrogenase, mitochondrial OS=Homo sapiens GN=SARDH PE=1 SV=1	1	24.2	371.075	527.648	100.302	333.008
FUCO2_HUMAN	Plasma alpha-L-fucosidase OS=Homo sapiens GN=FUCA2 PE=1 SV=2	1	36.97	717.549	0	224.115	313.888
PSMD5_HUMAN	26S proteasome non-ATPase regulatory subunit 5 OS=Homo sapiens GN=PSMD5 PE=1 SV=3	1	30.2	406.498	471.406	56.2404	311.381
XPOT_HUMAN	Exportin-T OS=Homo sapiens GN=XPOT PE=1 SV=2	1	32.11	0	431.146	447.63	292.925
NEXN_HUMAN	Nexilin OS=Homo sapiens GN=NEXN PE=1 SV=1	1	20.37	612.952	1.01341	241.485	285.15
SDCB1_HUMAN	Syntenin-1 OS=Homo sapiens GN=SDCBP PE=1 SV=1	1	68.66	584.462	0	256.262	280.241
IF172_HUMAN	Intraflagellar transport protein 172 homolog OS=Homo sapiens GN=IFT172 PE=1 SV=2	1	24.65	532.313	0	306.288	279.534
VP26A_HUMAN	Vacuolar protein sorting-associated protein 26A OS=Homo sapiens GN=VPS26A PE=1 SV=2	1	31.67	0	24.7511	784.758	269.836
OFD1_HUMAN	Oral-facial-digital syndrome 1 protein OS=Homo sapiens GN=OFD1 PE=1 SV=1	1	24.86	5.43018	526.717	235.339	255.829
FUMH_HUMAN	Fumarate hydratase, mitochondrial OS=Homo sapiens GN=FH PE=1 SV=3	1	34.59	0	741.67	2.58314	248.084
BGLR_HUMAN	Beta-glucuronidase OS=Homo sapiens GN=GUSB PE=1 SV=2	1	24.64	126.475	284.689	318.231	243.132
IMA1_HUMAN	Importin subunit alpha-1 OS=Homo sapiens GN=KPNA2 PE=1 SV=1	1	53.04	1.2019	681.521	0	227.574
UBAC1_HUMAN	Ubiquitin-associated domain-containing protein 1 OS=Homo sapiens GN=UBAC1 PE=1 SV=1	1	27.59	50.4473	460.746	166.412	225.869
ANPRC_HUMAN	Atrial natriuretic peptide receptor 3 OS=Homo sapiens GN=NPR3 PE=1 SV=2	2	68.47	195.393	358.791	117.261	223.815
OSMR_HUMAN	Oncostatin-M-specific receptor subunit beta OS=Homo sapiens GN=OSMR PE=1 SV=1	1	22.16	335.829	0	334.413	223.414
MICU1_HUMAN	Calcium uptake protein 1, mitochondrial OS=Homo sapiens GN=MICU1 PE=1 SV=1	1	26.78	149.587	205.743	314.033	223.121
NCBP2_HUMAN	Nuclear cap-binding protein subunit 2 OS=Homo sapiens GN=NCBP2 PE=1 SV=1	1	25.74	663.931	0	0	221.31
UBFL1_HUMAN	Upstream-binding factor 1-like protein 1 OS=Homo sapiens GN=UBTFL1 PE=3 SV=1	1	22.4	0	297.949	293.323	197.091
CA094_HUMAN	Uncharacterized protein C1orf94 OS=Homo sapiens GN=C1orf94 PE=1 SV=2	1	33.36	320.664	26.8862	182.181	176.577
THBG_HUMAN	Thyroxine-binding globulin OS=Homo sapiens GN=SERPINA7 PE=1 SV=2	1	65.74	114.207	0	378.873	164.36
ILK_HUMAN	Integrin-linked protein kinase OS=Homo sapiens GN=ILK PE=1 SV=2	1	31.3	209.633	199.291	77.4229	162.116
COQ5_HUMAN	2-methoxy-6-polyprenyl-1,4-benzoquinol methylase, mitochondrial OS=Homo sapiens GN=COQ5 PE=1 SV=2	1	23.77	45.819	0	407.083	150.967
PZP_HUMAN	Pregnancy zone protein OS=Homo sapiens GN=PZP PE=1 SV=4	1	79.05	0	290.249	150.611	146.953
ST1B1_HUMAN	Sulfotransferase family cytosolic 1B member 1 OS=Homo sapiens GN=SULT1B1 PE=1 SV=2	1	25.29	413.842	0	0	137.947
T3HPD_HUMAN	Trans-3-hydroxy-L-proline dehydratase OS=Homo sapiens GN=L3HYPDH PE=1 SV=2	1	26.83	135.204	0	240.063	125.089
BRE1B_HUMAN	E3 ubiquitin-protein ligase BRE1B OS=Homo sapiens GN=RNF40 PE=1 SV=4	1	21.69	63.9463	8.98471	297.041	123.324
COMT_HUMAN	Catechol O-methyltransferase OS=Homo sapiens GN=COMT PE=1 SV=2	1	22.63	0	0	289.642	96.5474
DHB4_HUMAN	Peroxisomal multifunctional enzyme type 2 OS=Homo sapiens GN=HSD17B4 PE=1 SV=3	1	34.27	0	278.474	0	92.8246
MSMB_HUMAN	Beta-microseminoprotein OS=Homo sapiens GN=MSMB PE=1 SV=1	1	21.84	6.54756	268.749	0	91.7654
FAAA_HUMAN	Fumarylacetoacetase OS=Homo sapiens GN=FAH PE=1 SV=2	2	63.57	269.258	0.84214	0.0851247	90.0619
SAE1_HUMAN	SUMO-activating enzyme subunit 1 OS=Homo sapiens GN=SAE1 PE=1 SV=1	1	52.87	0	0	234.134	78.0448
PK1L3_HUMAN	Polycystic kidney disease protein 1-like 3 OS=Homo sapiens GN=PKD1L3 PE=1 SV=1	1	22.22	185.744	18.2619	2.18001	68.7285
PTHR_HUMAN	Parathyroid hormone-related protein OS=Homo sapiens GN=PTHLH PE=1 SV=1	1	36.87	102.311	0	83.8685	62.0599
FBRL_HUMAN	rRNA 2'-O-methyltransferase fibrillarin OS=Homo sapiens GN=FBL PE=1 SV=2	1	31.28	168.362	0	0	56.1205
MMP10_HUMAN	Stromelysin-2 OS=Homo sapiens GN=MMP10 PE=1 SV=1	1	210.98	110.226	20.9014	0.576138	43.9012
SULF2_HUMAN	Extracellular sulfatase Sulf-2 OS=Homo sapiens GN=SULF2 PE=1 SV=1	1	22.91	108.206	0	0	36.0686
ERF1_HUMAN	Eukaryotic peptide chain release factor subunit 1 OS=Homo sapiens GN=ETF1 PE=1 SV=3	1	39.7	101.071	0	0	33.6905
SDHA_HUMAN	Succinate dehydrogenase [ubiquinone] flavoprotein subunit, mitochondrial OS=Homo sapiens GN=SDHA PE=1 SV=2	1	47.46	30.5423	47.9866	0	26.1763
PRS6A_HUMAN	26S proteasome regulatory subunit 6A OS=Homo sapiens GN=PSMC3 PE=1 SV=3	1	36.65	0	0	27.9343	9.31142
TENX_HUMAN	Tenascin-X OS=Homo sapiens GN=TNXB PE=1 SV=4	2	55.07	0	0	13.7526	4.58421
ODO2_HUMAN	Dihydrolipoyllysine-residue succinyltransferase component of 2-oxoglutarate dehydrogenase complex, mitochondrial OS=Homo sapiens GN=DLST PE=1 SV=4	1	30.62	0.193426	0.225928	0	0.139784

## Sheet: ERS-PAT2
				ERS-FAM2
Accession	Description	Peptides used for quantitation	Confidence score	Surn_ERS_FAM2_1_01	Surn_ERS_FAM2_2_01	Surn_ERS_FAM3_3_01	Average Abundance
MMP1_HUMAN	Interstitial collagenase OS=Homo sapiens GN=MMP1 PE=1 SV=3	29	1487.43	7.35474e+07	6.98212e+06	7.20188e+07	5.08494e+07
FINC_HUMAN	Fibronectin OS=Homo sapiens GN=FN1 PE=1 SV=4	59	3015.54	3.45099e+07	2.8941e+07	3.491e+07	3.2787e+07
CO1A2_HUMAN	Collagen alpha-2(I) chain OS=Homo sapiens GN=COL1A2 PE=1 SV=7	78	4061.73	1.57826e+07	4.29095e+07	3.70865e+07	3.19262e+07
MMP2_HUMAN;MMP11_HUMAN	72 kDa type IV collagenase OS=Homo sapiens GN=MMP2 PE=1 SV=2	36	1715.92	1.68109e+07	1.35534e+07	2.48285e+07	1.83976e+07
PCOC1_HUMAN	Procollagen C-endopeptidase enhancer 1 OS=Homo sapiens GN=PCOLCE PE=1 SV=2	19	962.47	9.04308e+06	1.17929e+07	1.70756e+07	1.26372e+07
TIMP1_HUMAN	Metalloproteinase inhibitor 1 OS=Homo sapiens GN=TIMP1 PE=1 SV=1	9	446.08	1.48425e+07	9.53166e+06	1.08698e+07	1.1748e+07
C1R_HUMAN;C1RL_HUMAN	Complement C1r subcomponent OS=Homo sapiens GN=C1R PE=1 SV=2	29	1511.67	8.82837e+06	6.30383e+06	1.46548e+07	9.92898e+06
TSP1_HUMAN;RHG35_HUMAN	Thrombospondin-1 OS=Homo sapiens GN=THBS1 PE=1 SV=2	40	2186.63	9.09686e+06	9.15889e+06	1.04163e+07	9.55735e+06
PGS2_HUMAN	Decorin OS=Homo sapiens GN=DCN PE=1 SV=1	21	1002.48	8.2496e+06	8.69518e+06	8.81227e+06	8.58568e+06
FBLN1_HUMAN	Fibulin-1 OS=Homo sapiens GN=FBLN1 PE=1 SV=4	21	1126.34	6.16413e+06	6.6521e+06	1.16401e+07	8.15211e+06
COCA1_HUMAN	Collagen alpha-1(XII) chain OS=Homo sapiens GN=COL12A1 PE=1 SV=2	70	3196.23	1.06683e+07	6.4213e+06	6.6591e+06	7.91625e+06
CO1A1_HUMAN	Collagen alpha-1(I) chain OS=Homo sapiens GN=COL1A1 PE=1 SV=5	43	1992.32	4.41938e+06	8.68091e+06	7.69695e+06	6.93241e+06
C1S_HUMAN	Complement C1s subcomponent OS=Homo sapiens GN=C1S PE=1 SV=1	29	1436.16	6.93537e+06	4.64813e+06	8.11252e+06	6.56534e+06
GDN_HUMAN	Glia-derived nexin OS=Homo sapiens GN=SERPINE2 PE=1 SV=1	19	959.15	6.97014e+06	6.28187e+06	5.74336e+06	6.33179e+06
IBP7_HUMAN	Insulin-like growth factor-binding protein 7 OS=Homo sapiens GN=IGFBP7 PE=1 SV=1	16	796.77	4.31221e+06	6.62996e+06	7.77438e+06	6.23885e+06
CO6A1_HUMAN	Collagen alpha-1(VI) chain OS=Homo sapiens GN=COL6A1 PE=1 SV=3	28	1347.67	5.23776e+06	5.89332e+06	5.40294e+06	5.51134e+06
BGH3_HUMAN	Transforming growth factor-beta-induced protein ig-h3 OS=Homo sapiens GN=TGFBI PE=1 SV=1	25	1167.75	8.83988e+06	4.56201e+06	2.65566e+06	5.35251e+06
SPRC_HUMAN	SPARC OS=Homo sapiens GN=SPARC PE=1 SV=1	13	543.92	1.52291e+06	5.67873e+06	3.99119e+06	3.73095e+06
MMP3_HUMAN	Stromelysin-1 OS=Homo sapiens GN=MMP3 PE=1 SV=2	18	971.32	3.92864e+06	2.32314e+06	4.8937e+06	3.71516e+06
QSOX1_HUMAN	Sulfhydryl oxidase 1 OS=Homo sapiens GN=QSOX1 PE=1 SV=3	28	1410.62	3.32029e+06	3.76852e+06	4.06472e+06	3.71784e+06
CO6A2_HUMAN	Collagen alpha-2(VI) chain OS=Homo sapiens GN=COL6A2 PE=1 SV=4	23	1091.94	3.35862e+06	3.72544e+06	4.00041e+06	3.69483e+06
TSP2_HUMAN	Thrombospondin-2 OS=Homo sapiens GN=THBS2 PE=1 SV=2	27	1601.45	5.27803e+06	2.70238e+06	2.49409e+06	3.4915e+06
PEDF_HUMAN	Pigment epithelium-derived factor OS=Homo sapiens GN=SERPINF1 PE=1 SV=4	14	737.18	2.40971e+06	2.42545e+06	5.5814e+06	3.47219e+06
ALBU_HUMAN	Serum albumin OS=Homo sapiens GN=ALB PE=1 SV=2	6	288.15	5.03352e+06	4.65318e+06	343896	3.34353e+06
CO6A3_HUMAN	Collagen alpha-3(VI) chain OS=Homo sapiens GN=COL6A3 PE=1 SV=5	59	2724.17	3.50055e+06	2.65325e+06	3.76876e+06	3.30752e+06
VIME_HUMAN;AINX_HUMAN;DESM_HUMAN;GFAP_HUMAN;PERI_HUMAN	Vimentin OS=Homo sapiens GN=VIM PE=1 SV=4	41	2000.4	1.56769e+06	3.00581e+06	5.09519e+06	3.2229e+06
CATB_HUMAN	Cathepsin B OS=Homo sapiens GN=CTSB PE=1 SV=3	14	635.3	3.84724e+06	2.06717e+06	3.53037e+06	3.14826e+06
PTX3_HUMAN;AN30A_HUMAN	Pentraxin-related protein PTX3 OS=Homo sapiens GN=PTX3 PE=1 SV=3	15	901.14	2.92675e+06	1.8564e+06	2.01013e+06	2.26443e+06
TRFL_HUMAN	Lactotransferrin OS=Homo sapiens GN=LTF PE=1 SV=6	4	150.05	3.5062e+06	2.67518e+06	199394	2.12692e+06
G3P_HUMAN;G3PT_HUMAN	Glyceraldehyde-3-phosphate dehydrogenase OS=Homo sapiens GN=GAPDH PE=1 SV=3	11	553.01	719963	2.31742e+06	3.29398e+06	2.11045e+06
FETUA_HUMAN	Alpha-2-HS-glycoprotein OS=Homo sapiens GN=AHSG PE=1 SV=1	3	215.83	3.14791e+06	1.85961e+06	1.04664e+06	2.01806e+06
ACTB_HUMAN;ACTBL_HUMAN;ACTBM_HUMAN;POTEE_HUMAN;POTEF_HUMAN;POTEI_HUMAN	Actin, cytoplasmic 1 OS=Homo sapiens GN=ACTB PE=1 SV=1	6	848.99	799064	1.94336e+06	3.28325e+06	2.00856e+06
MASP1_HUMAN	Mannan-binding lectin serine protease 1 OS=Homo sapiens GN=MASP1 PE=1 SV=3	7	380.95	3.37225e+06	1.621e+06	940183	1.97781e+06
SERPH_HUMAN	Serpin H1 OS=Homo sapiens GN=SERPINH1 PE=1 SV=2	13	611.7	2.20782e+06	1.85557e+06	1.75833e+06	1.94057e+06
LMNA_HUMAN;LMNB1_HUMAN	Prelamin-A/C OS=Homo sapiens GN=LMNA PE=1 SV=1	37	1803.18	756657	1.57577e+06	3.42389e+06	1.91877e+06
KPYM_HUMAN;KPYR_HUMAN	Pyruvate kinase PKM OS=Homo sapiens GN=PKM PE=1 SV=4	18	898.65	693793	1.71357e+06	2.94988e+06	1.78575e+06
FLNA_HUMAN;FLNB_HUMAN	Filamin-A OS=Homo sapiens GN=FLNA PE=1 SV=4	44	1872	773044	1.42445e+06	3.08462e+06	1.7607e+06
CO3_HUMAN	Complement C3 OS=Homo sapiens GN=C3 PE=1 SV=2	55	2612.93	2.89023e+06	874894	544163	1.43643e+06
TENA_HUMAN	Tenascin OS=Homo sapiens GN=TNC PE=1 SV=3	21	1039.02	1.72964e+06	1.17856e+06	1.17571e+06	1.3613e+06
GELS_HUMAN	Gelsolin OS=Homo sapiens GN=GSN PE=1 SV=1	17	742.45	973073	1.05768e+06	1.53526e+06	1.18867e+06
GRP78_HUMAN	78 kDa glucose-regulated protein OS=Homo sapiens GN=HSPA5 PE=1 SV=2	21	1136.91	679327	1.09931e+06	1.75592e+06	1.17818e+06
POF1B_HUMAN	Protein POF1B OS=Homo sapiens GN=POF1B PE=1 SV=3	1	22.84	2.5552e+06	757317	84129.5	1.13222e+06
CO3A1_HUMAN	Collagen alpha-1(III) chain OS=Homo sapiens GN=COL3A1 PE=1 SV=4	19	855.62	666789	1.39305e+06	1.08761e+06	1.04915e+06
TIMP2_HUMAN	Metalloproteinase inhibitor 2 OS=Homo sapiens GN=TIMP2 PE=1 SV=2	8	361.17	603380	887160	1.46176e+06	984099
LAMB2_HUMAN	Laminin subunit beta-2 OS=Homo sapiens GN=LAMB2 PE=1 SV=2	27	1297.31	893738	900016	1.14162e+06	978457
CTHR1_HUMAN	Collagen triple helix repeat-containing protein 1 OS=Homo sapiens GN=CTHRC1 PE=1 SV=1	6	246.26	1.09113e+06	611782	1.20144e+06	968118
CFAB_HUMAN	Complement factor B OS=Homo sapiens GN=CFB PE=1 SV=2	24	1086	1.73776e+06	520246	523146	927050
HTRA1_HUMAN	Serine protease HTRA1 OS=Homo sapiens GN=HTRA1 PE=1 SV=1	11	437.8	562308	1.06007e+06	1.11698e+06	913117
MFGM_HUMAN	Lactadherin OS=Homo sapiens GN=MFGE8 PE=1 SV=2	14	834.19	695179	1.0119e+06	976431	894503
HSP74_HUMAN	Heat shock 70 kDa protein 4 OS=Homo sapiens GN=HSPA4 PE=1 SV=4	2	67.84	954712	1.50655e+06	104933	855399
ENOA_HUMAN;ENOB_HUMAN	Alpha-enolase OS=Homo sapiens GN=ENO1 PE=1 SV=2	12	628.78	369695	709022	1.45105e+06	843255
PGBM_HUMAN	Basement membrane-specific heparan sulfate proteoglycan core protein OS=Homo sapiens GN=HSPG2 PE=1 SV=4	22	988.07	862648	742499	854732	819960
IBP2_HUMAN	Insulin-like growth factor-binding protein 2 OS=Homo sapiens GN=IGFBP2 PE=1 SV=2	7	322.57	756383	677515	868977	767625
CLUS_HUMAN	Clusterin OS=Homo sapiens GN=CLU PE=1 SV=1	12	578.27	534770	667758	1.02607e+06	742866
LG3BP_HUMAN	Galectin-3-binding protein OS=Homo sapiens GN=LGALS3BP PE=1 SV=1	13	681.34	981468	500327	714397	732064
LEG1_HUMAN	Galectin-1 OS=Homo sapiens GN=LGALS1 PE=1 SV=2	8	341.81	489003	646074	1.01119e+06	715422
ENPL_HUMAN;ENPLL_HUMAN	Endoplasmin OS=Homo sapiens GN=HSP90B1 PE=1 SV=1	23	1121.52	389633	606886	1.13945e+06	711989
CALU_HUMAN	Calumenin OS=Homo sapiens GN=CALU PE=1 SV=2	10	409.12	470876	738884	897636	702466
ANXA5_HUMAN	Annexin A5 OS=Homo sapiens GN=ANXA5 PE=1 SV=2	13	522.91	651010	748780	663197	687662
RF1M_HUMAN	Peptide chain release factor 1, mitochondrial OS=Homo sapiens GN=MTRF1 PE=1 SV=2	1	20.85	1.23315e+06	188347	610726	677409
NID2_HUMAN;LRP8_HUMAN	Nidogen-2 OS=Homo sapiens GN=NID2 PE=1 SV=3	17	747.36	1.13623e+06	477760	408516	674170
ITIH2_HUMAN	Inter-alpha-trypsin inhibitor heavy chain H2 OS=Homo sapiens GN=ITIH2 PE=1 SV=2	5	201.54	1.22179e+06	736503	58723.7	672340
LDHA_HUMAN;LDH6A_HUMAN	L-lactate dehydrogenase A chain OS=Homo sapiens GN=LDHA PE=1 SV=2	10	657.56	248724	518018	1.19836e+06	655032
PAI1_HUMAN	Plasminogen activator inhibitor 1 OS=Homo sapiens GN=SERPINE1 PE=1 SV=1	6	330.22	633013	759272	536247	642844
SRPX_HUMAN	Sushi repeat-containing protein SRPX OS=Homo sapiens GN=SRPX PE=1 SV=1	9	367.24	804415	552450	546032	634299
ANXA2_HUMAN;AXA2L_HUMAN	Annexin A2 OS=Homo sapiens GN=ANXA2 PE=1 SV=2	13	755.74	208495	621368	1.00276e+06	610873
HSP7C_HUMAN;HSP72_HUMAN	Heat shock cognate 71 kDa protein OS=Homo sapiens GN=HSPA8 PE=1 SV=1	15	1090.52	285160	548070	926211	586480
ANGL2_HUMAN;ANGL1_HUMAN;ANGL6_HUMAN	Angiopoietin-related protein 2 OS=Homo sapiens GN=ANGPTL2 PE=1 SV=1	11	521.1	547367	741353	436038	574919
FBLN3_HUMAN	EGF-containing fibulin-like extracellular matrix protein 1 OS=Homo sapiens GN=EFEMP1 PE=1 SV=2	9	399.51	380154	639795	696714	572221
OVOS1_HUMAN	Ovostatin homolog 1 OS=Homo sapiens GN=OVOS1 PE=2 SV=2	1	22.79	974890	694491	45618.6	571667
CATZ_HUMAN	Cathepsin Z OS=Homo sapiens GN=CTSZ PE=1 SV=1	7	302.45	642885	550782	453763	549143
LAMC1_HUMAN	Laminin subunit gamma-1 OS=Homo sapiens GN=LAMC1 PE=1 SV=3	15	702.19	585131	495546	551877	544185
BAG2_HUMAN	BAG family molecular chaperone regulator 2 OS=Homo sapiens GN=BAG2 PE=1 SV=1	3	114.92	1.09875e+06	354302	102103	518387
FBLN5_HUMAN	Fibulin-5 OS=Homo sapiens GN=FBLN5 PE=1 SV=1	5	224.02	369839	531419	625553	508937
GPC1_HUMAN	Glypican-1 OS=Homo sapiens GN=GPC1 PE=1 SV=2	7	254.58	269240	413097	817019	499785
ALDOA_HUMAN	Fructose-bisphosphate aldolase A OS=Homo sapiens GN=ALDOA PE=1 SV=2	11	574.38	292825	385467	790808	489700
FKB10_HUMAN;CABP7_HUMAN	Peptidyl-prolyl cis-trans isomerase FKBP10 OS=Homo sapiens GN=FKBP10 PE=1 SV=1	9	335.34	256150	509221	655797	473723
AEBP1_HUMAN	Adipocyte enhancer-binding protein 1 OS=Homo sapiens GN=AEBP1 PE=1 SV=1	10	446.23	510965	361112	489816	453964
SODE_HUMAN	Extracellular superoxide dismutase [Cu-Zn] OS=Homo sapiens GN=SOD3 PE=1 SV=2	7	333.45	430279	337703	586428	451470
TBB5_HUMAN;TBB1_HUMAN;TBB2B_HUMAN;TBB8L_HUMAN	Tubulin beta chain OS=Homo sapiens GN=TUBB PE=1 SV=2	3	693.63	137508	342546	700950	393668
EDIL3_HUMAN	EGF-like repeat and discoidin I-like domain-containing protein 3 OS=Homo sapiens GN=EDIL3 PE=1 SV=1	7	252.74	443076	454447	259053	385525
PDIA3_HUMAN	Protein disulfide-isomerase A3 OS=Homo sapiens GN=PDIA3 PE=1 SV=4	13	543.28	205485	360360	582492	382779
FSTL1_HUMAN	Follistatin-related protein 1 OS=Homo sapiens GN=FSTL1 PE=1 SV=1	10	453.72	256760	453833	429051	379881
FBLN4_HUMAN	EGF-containing fibulin-like extracellular matrix protein 2 OS=Homo sapiens GN=EFEMP2 PE=1 SV=3	4	167.06	336296	360985	439304	378862
ZN362_HUMAN	Zinc finger protein 362 OS=Homo sapiens GN=ZNF362 PE=1 SV=1	1	31.62	22946	989818	99915.2	370893
TPIS_HUMAN	Triosephosphate isomerase OS=Homo sapiens GN=TPI1 PE=1 SV=3	9	413.4	193029	260514	649232	367592
OLFL3_HUMAN	Olfactomedin-like protein 3 OS=Homo sapiens GN=OLFML3 PE=2 SV=1	11	506.87	356251	337829	407064	367048
CALR_HUMAN	Calreticulin OS=Homo sapiens GN=CALR PE=1 SV=1	8	392.52	114079	297116	645640	352278
LOXL2_HUMAN	Lysyl oxidase homolog 2 OS=Homo sapiens GN=LOXL2 PE=1 SV=1	10	390.12	237150	516723	301009	351627
PXDN_HUMAN	Peroxidasin homolog OS=Homo sapiens GN=PXDN PE=1 SV=2	15	631.15	511510	294457	241058	349009
PLOD1_HUMAN;ARHGI_HUMAN	Procollagen-lysine,2-oxoglutarate 5-dioxygenase 1 OS=Homo sapiens GN=PLOD1 PE=1 SV=2	7	299.98	389398	357825	297358	348193
PPIB_HUMAN	Peptidyl-prolyl cis-trans isomerase B OS=Homo sapiens GN=PPIB PE=1 SV=2	6	285.99	281412	287832	461807	343684
PROF1_HUMAN	Profilin-1 OS=Homo sapiens GN=PFN1 PE=1 SV=2	5	217.36	128324	325450	546482	333419
HEXB_HUMAN	Beta-hexosaminidase subunit beta OS=Homo sapiens GN=HEXB PE=1 SV=3	9	321.58	358296	236483	402329	332369
HS90B_HUMAN;H90B2_HUMAN;H90B3_HUMAN;H90B4_HUMAN;HS904_HUMAN	Heat shock protein HSP 90-beta OS=Homo sapiens GN=HSP90AB1 PE=1 SV=4	12	884.06	414303	269414	278372	320696
INP4B_HUMAN	Type II inositol 3,4-bisphosphate 4-phosphatase OS=Homo sapiens GN=INPP4B PE=2 SV=4	1	20.95	438922	477977	34915.5	317272
IC1_HUMAN	Plasma protease C1 inhibitor OS=Homo sapiens GN=SERPING1 PE=1 SV=2	4	162.27	314796	300646	330931	315458
HEXA_HUMAN	Beta-hexosaminidase subunit alpha OS=Homo sapiens GN=HEXA PE=1 SV=2	9	376.37	327413	241231	373973	314206
LAMA4_HUMAN	Laminin subunit alpha-4 OS=Homo sapiens GN=LAMA4 PE=1 SV=4	12	426.35	290232	289158	355761	311717
GAS6_HUMAN	Growth arrest-specific protein 6 OS=Homo sapiens GN=GAS6 PE=1 SV=2	8	404.75	292052	283802	332375	302743
CATL1_HUMAN	Cathepsin L1 OS=Homo sapiens GN=CTSL PE=1 SV=2	2	89.63	514148	170919	218778	301282
CSPG2_HUMAN	Versican core protein OS=Homo sapiens GN=VCAN PE=1 SV=3	8	319.28	432696	196512	259284	296164
HMGC2_HUMAN	3-hydroxymethyl-3-methylglutaryl-CoA lyase, cytoplasmic OS=Homo sapiens GN=HMGCLL1 PE=1 SV=3	1	28.09	221109	370547	286814	292823
PGS1_HUMAN	Biglycan OS=Homo sapiens GN=BGN PE=1 SV=2	5	206.3	243587	357542	258595	286575
CATD_HUMAN	Cathepsin D OS=Homo sapiens GN=CTSD PE=1 SV=1	6	229.57	372579	219743	246416	279579
GNS_HUMAN	N-acetylglucosamine-6-sulfatase OS=Homo sapiens GN=GNS PE=1 SV=3	5	192.92	356246	195459	280110	277272
CO5A1_HUMAN	Collagen alpha-1(V) chain OS=Homo sapiens GN=COL5A1 PE=1 SV=3	6	190.89	240446	310550	277939	276312
TERA_HUMAN;KATL2_HUMAN	Transitional endoplasmic reticulum ATPase OS=Homo sapiens GN=VCP PE=1 SV=4	13	577.69	400546	155746	254972	270421
ENPP2_HUMAN	Ectonucleotide pyrophosphatase/phosphodiesterase family member 2 OS=Homo sapiens GN=ENPP2 PE=1 SV=3	4	157.9	278172	312529	218413	269705
TKT_HUMAN	Transketolase OS=Homo sapiens GN=TKT PE=1 SV=3	11	465.54	129848	171126	501093	267356
VASN_HUMAN	Vasorin OS=Homo sapiens GN=VASN PE=1 SV=1	7	392.02	201317	254810	327909	261345
EF2_HUMAN	Elongation factor 2 OS=Homo sapiens GN=EEF2 PE=1 SV=4	15	579.13	110455	241189	429505	260383
PDIA1_HUMAN	Protein disulfide-isomerase OS=Homo sapiens GN=P4HB PE=1 SV=3	10	526.11	137464	227735	384212	249804
FBLN2_HUMAN	Fibulin-2 OS=Homo sapiens GN=FBLN2 PE=1 SV=2	10	496.07	161994	139942	443598	248511
CD166_HUMAN	CD166 antigen OS=Homo sapiens GN=ALCAM PE=1 SV=2	5	203.11	493758	91645.2	156917	247440
LDHB_HUMAN	L-lactate dehydrogenase B chain OS=Homo sapiens GN=LDHB PE=1 SV=2	6	359.55	116209	186462	436225	246298
CATK_HUMAN	Cathepsin K OS=Homo sapiens GN=CTSK PE=1 SV=1	6	230.93	164168	174308	393055	243844
RS27A_HUMAN	Ubiquitin-40S ribosomal protein S27a OS=Homo sapiens GN=RPS27A PE=1 SV=2	3	75.5	98697.7	243665	387999	243454
ANT3_HUMAN	Antithrombin-III OS=Homo sapiens GN=SERPINC1 PE=1 SV=1	2	120.07	150094	409046	162979	240706
PLOD3_HUMAN	Procollagen-lysine,2-oxoglutarate 5-dioxygenase 3 OS=Homo sapiens GN=PLOD3 PE=1 SV=1	9	431.76	217468	215365	281470	238101
PPGB_HUMAN	Lysosomal protective protein OS=Homo sapiens GN=CTSA PE=1 SV=2	5	182.74	241471	234877	221491	232613
EF1A1_HUMAN	Elongation factor 1-alpha 1 OS=Homo sapiens GN=EEF1A1 PE=1 SV=1	2	328.88	18649.9	241920	401156	220575
GPNMB_HUMAN	Transmembrane glycoprotein NMB OS=Homo sapiens GN=GPNMB PE=1 SV=2	2	100.07	117069	138322	370936	208776
FBN1_HUMAN	Fibrillin-1 OS=Homo sapiens GN=FBN1 PE=1 SV=3	7	286.72	116950	233288	259552	203263
GDIR1_HUMAN	Rho GDP-dissociation inhibitor 1 OS=Homo sapiens GN=ARHGDIA PE=1 SV=3	2	93.05	146891	151664	306112	201556
SODC_HUMAN	Superoxide dismutase [Cu-Zn] OS=Homo sapiens GN=SOD1 PE=1 SV=2	6	252.21	114617	178216	309315	200716
CSTN1_HUMAN	Calsyntenin-1 OS=Homo sapiens GN=CLSTN1 PE=1 SV=1	7	259.54	190056	185984	217468	197836
KIF2C_HUMAN	Kinesin-like protein KIF2C OS=Homo sapiens GN=KIF2C PE=1 SV=2	1	21.74	100377	233662	252585	195541
DKK3_HUMAN	Dickkopf-related protein 3 OS=Homo sapiens GN=DKK3 PE=1 SV=2	4	204.75	173245	202959	200372	192192
LAMB1_HUMAN	Laminin subunit beta-1 OS=Homo sapiens GN=LAMB1 PE=1 SV=2	10	341.45	238236	140005	192017	190086
TGFB1_HUMAN	Transforming growth factor beta-1 OS=Homo sapiens GN=TGFB1 PE=1 SV=2	4	133.14	154894	202848	209997	189246
AHNK_HUMAN	Neuroblast differentiation-associated protein AHNAK OS=Homo sapiens GN=AHNAK PE=1 SV=2	11	424.78	191498	151483	222066	188349
LOXL1_HUMAN	Lysyl oxidase homolog 1 OS=Homo sapiens GN=LOXL1 PE=1 SV=2	6	232.04	220100	183903	155559	186521
NPIA1_HUMAN	Nuclear pore complex-interacting protein family member A1 OS=Homo sapiens GN=NPIPA1 PE=2 SV=3	1	23.96	301398	54874.7	198991	185088
NUCL_HUMAN	Nucleolin OS=Homo sapiens GN=NCL PE=1 SV=3	12	490.07	98431.2	169925	278170	182175
PLTP_HUMAN	Phospholipid transfer protein OS=Homo sapiens GN=PLTP PE=1 SV=1	6	262.73	112096	151903	281287	181762
NPC2_HUMAN	Epididymal secretory protein E1 OS=Homo sapiens GN=NPC2 PE=1 SV=1	3	107.8	205527	156175	173206	178303
SVEP1_HUMAN	Sushi, von Willebrand factor type A, EGF and pentraxin domain-containing protein 1 OS=Homo sapiens GN=SVEP1 PE=1 SV=3	8	321.23	250695	138695	141017	176802
PGK1_HUMAN;PGK2_HUMAN	Phosphoglycerate kinase 1 OS=Homo sapiens GN=PGK1 PE=1 SV=3	8	357.75	82479.6	156918	290271	176556
CPXM2_HUMAN	Inactive carboxypeptidase-like protein X2 OS=Homo sapiens GN=CPXM2 PE=2 SV=3	7	330.16	278051	101925	136297	172091
GRP75_HUMAN	Stress-70 protein, mitochondrial OS=Homo sapiens GN=HSPA9 PE=1 SV=2	12	605.22	28609.1	143241	342641	171497
THY1_HUMAN	Thy-1 membrane glycoprotein OS=Homo sapiens GN=THY1 PE=1 SV=2	3	166.47	67892.9	217806	225553	170418
HS90A_HUMAN;HS902_HUMAN;HS905_HUMAN;XPP3_HUMAN	Heat shock protein HSP 90-alpha OS=Homo sapiens GN=HSP90AA1 PE=1 SV=5	6	623.67	99004.8	136488	245077	160190
PODN_HUMAN	Podocan OS=Homo sapiens GN=PODN PE=1 SV=2	11	413.55	76614.5	134198	262958	157924
POSTN_HUMAN	Periostin OS=Homo sapiens GN=POSTN PE=1 SV=2	15	707.5	82551.3	121792	268171	157505
MDHM_HUMAN	Malate dehydrogenase, mitochondrial OS=Homo sapiens GN=MDH2 PE=1 SV=3	8	317.65	31692.3	120682	311250	154541
FSCN1_HUMAN	Fascin OS=Homo sapiens GN=FSCN1 PE=1 SV=3	10	374.22	70579.3	142463	245283	152775
SPON2_HUMAN	Spondin-2 OS=Homo sapiens GN=SPON2 PE=1 SV=3	3	133.89	51758.3	180017	222838	151538
WNT5A_HUMAN	Protein Wnt-5a OS=Homo sapiens GN=WNT5A PE=1 SV=2	6	334.65	139724	167941	143251	150305
PRDX1_HUMAN	Peroxiredoxin-1 OS=Homo sapiens GN=PRDX1 PE=1 SV=1	4	263.23	67016.6	138315	241778	149036
CD44_HUMAN	CD44 antigen OS=Homo sapiens GN=CD44 PE=1 SV=3	6	287.71	159061	132456	155579	149032
DAG1_HUMAN	Dystroglycan OS=Homo sapiens GN=DAG1 PE=1 SV=2	3	111.86	184774	120332	139527	148211
B3A4_HUMAN	Anion exchange protein 4 OS=Homo sapiens GN=SLC4A9 PE=2 SV=2	1	20.97	112014	120230	209035	147093
B4GT1_HUMAN;B4GT5_HUMAN	Beta-1,4-galactosyltransferase 1 OS=Homo sapiens GN=B4GALT1 PE=1 SV=5	6	208.66	150368	145396	145306	147023
RINI_HUMAN	Ribonuclease inhibitor OS=Homo sapiens GN=RNH1 PE=1 SV=2	9	458.13	27408.7	142418	267881	145903
TR11B_HUMAN	Tumor necrosis factor receptor superfamily member 11B OS=Homo sapiens GN=TNFRSF11B PE=1 SV=3	4	168.5	140675	134487	162189	145784
LYOX_HUMAN	Protein-lysine 6-oxidase OS=Homo sapiens GN=LOX PE=1 SV=2	5	203.82	120768	159234	149695	143232
NET1_HUMAN	Netrin-1 OS=Homo sapiens GN=NTN1 PE=1 SV=2	4	156.61	106307	106439	209086	140611
TRFE_HUMAN	Serotransferrin OS=Homo sapiens GN=TF PE=1 SV=3	2	43.7	178761	214842	26683.7	140096
KLH15_HUMAN	Kelch-like protein 15 OS=Homo sapiens GN=KLHL15 PE=1 SV=2	1	23.7	131206	106325	182134	139888
TPP1_HUMAN	Tripeptidyl-peptidase 1 OS=Homo sapiens GN=TPP1 PE=1 SV=2	4	241.85	195793	106868	108399	137020
PLEC_HUMAN;EPIPL_HUMAN	Plectin OS=Homo sapiens GN=PLEC PE=1 SV=3	18	711	66663.5	116205	227365	136745
5NTD_HUMAN	5'-nucleotidase OS=Homo sapiens GN=NT5E PE=1 SV=1	7	309.53	128910	118744	153206	133620
CC171_HUMAN	Coiled-coil domain-containing protein 171 OS=Homo sapiens GN=CCDC171 PE=2 SV=1	2	54.74	164396	146583	84640	131873
STC1_HUMAN	Stanniocalcin-1 OS=Homo sapiens GN=STC1 PE=1 SV=1	2	82.6	160961	121048	113092	131700
ANXA1_HUMAN	Annexin A1 OS=Homo sapiens GN=ANXA1 PE=1 SV=2	10	439.04	73087.1	124594	194331	130671
DSG4_HUMAN	Desmoglein-4 OS=Homo sapiens GN=DSG4 PE=1 SV=1	1	21.76	263955	111946	8333.85	128078
GCNT3_HUMAN	Beta-1,3-galactosyl-O-glycosyl-glycoprotein beta-1,6-N-acetylglucosaminyltransferase 3 OS=Homo sapiens GN=GCNT3 PE=2 SV=1	1	23.45	182730	171384	27966.4	127360
TSG6_HUMAN	Tumor necrosis factor-inducible gene 6 protein OS=Homo sapiens GN=TNFAIP6 PE=1 SV=2	5	234.22	95508.6	119993	163974	126492
FBN2_HUMAN	Fibrillin-2 OS=Homo sapiens GN=FBN2 PE=1 SV=3	6	275.79	124060	135090	109990	123047
PPIA_HUMAN;PAL4A_HUMAN	Peptidyl-prolyl cis-trans isomerase A OS=Homo sapiens GN=PPIA PE=1 SV=2	7	239.04	43021.3	127369	196059	122150
LUM_HUMAN	Lumican OS=Homo sapiens GN=LUM PE=1 SV=2	7	378.84	82008.1	151327	132523	121953
ECM1_HUMAN	Extracellular matrix protein 1 OS=Homo sapiens GN=ECM1 PE=1 SV=2	5	186.4	112734	96653.7	151819	120402
CASP2_HUMAN	Caspase-2 OS=Homo sapiens GN=CASP2 PE=1 SV=2	1	21.56	82960.9	133515	136209	117562
FMOD_HUMAN	Fibromodulin OS=Homo sapiens GN=FMOD PE=1 SV=2	2	114.69	112914	58711.1	179570	117065
VTNC_HUMAN	Vitronectin OS=Homo sapiens GN=VTN PE=1 SV=1	1	52.83	140091	75150.8	135504	116915
UFO_HUMAN	Tyrosine-protein kinase receptor UFO OS=Homo sapiens GN=AXL PE=1 SV=3	3	143.43	133608	122072	93710.3	116463
ATPA_HUMAN	ATP synthase subunit alpha, mitochondrial OS=Homo sapiens GN=ATP5A1 PE=1 SV=1	11	444.81	13872.5	117253	217423	116183
EMIL1_HUMAN	EMILIN-1 OS=Homo sapiens GN=EMILIN1 PE=1 SV=3	8	331.32	117670	67284.1	157356	114103
TBX3_HUMAN	T-box transcription factor TBX3 OS=Homo sapiens GN=TBX3 PE=1 SV=4	1	26.21	31665.7	117465	191968	113700
ROA2_HUMAN	Heterogeneous nuclear ribonucleoproteins A2/B1 OS=Homo sapiens GN=HNRNPA2B1 PE=1 SV=2	8	300.51	17417.7	91173.1	227222	111938
LRP1_HUMAN	Prolow-density lipoprotein receptor-related protein 1 OS=Homo sapiens GN=LRP1 PE=1 SV=2	8	274.68	107024	86037	140213	111091
TB182_HUMAN	182 kDa tankyrase-1-binding protein OS=Homo sapiens GN=TNKS1BP1 PE=1 SV=4	2	53.78	164829	83633.3	84234.7	110899
ACTN1_HUMAN;ACTN3_HUMAN	Alpha-actinin-1 OS=Homo sapiens GN=ACTN1 PE=1 SV=2	8	915.57	63416.5	82548.6	184896	110287
FETA_HUMAN	Alpha-fetoprotein OS=Homo sapiens GN=AFP PE=1 SV=1	2	80.93	116190	127598	83411.8	109067
PTGDS_HUMAN	Prostaglandin-H2 D-isomerase OS=Homo sapiens GN=PTGDS PE=1 SV=1	2	95.62	50601.6	35149.7	241211	108988
HSPB1_HUMAN	Heat shock protein beta-1 OS=Homo sapiens GN=HSPB1 PE=1 SV=2	7	352.7	53798.2	86768.6	181862	107476
IBP5_HUMAN	Insulin-like growth factor-binding protein 5 OS=Homo sapiens GN=IGFBP5 PE=1 SV=1	4	139.86	93862.6	97701.8	123605	105056
TUT7_HUMAN	Terminal uridylyltransferase 7 OS=Homo sapiens GN=ZCCHC6 PE=1 SV=1	1	61.07	128656	74327.4	109773	104252
MA1A1_HUMAN	Mannosyl-oligosaccharide 1,2-alpha-mannosidase IA OS=Homo sapiens GN=MAN1A1 PE=1 SV=3	5	225.47	111588	85666.2	114053	103769
A2MG_HUMAN	Alpha-2-macroglobulin OS=Homo sapiens GN=A2M PE=1 SV=3	2	94.41	161185	135495	13363.4	103348
SFRP4_HUMAN	Secreted frizzled-related protein 4 OS=Homo sapiens GN=SFRP4 PE=1 SV=2	3	182.56	66147.8	136624	106102	102958
WDR1_HUMAN	WD repeat-containing protein 1 OS=Homo sapiens GN=WDR1 PE=1 SV=4	5	182.4	37829.7	114606	154542	102326
PKHA6_HUMAN	Pleckstrin homology domain-containing family A member 6 OS=Homo sapiens GN=PLEKHA6 PE=1 SV=4	1	22.76	7756.49	118232	179628	101872
GARS_HUMAN	Glycine--tRNA ligase OS=Homo sapiens GN=GARS PE=1 SV=3	5	240.61	162205	43744.2	97812.1	101254
ARP3_HUMAN	Actin-related protein 3 OS=Homo sapiens GN=ACTR3 PE=1 SV=3	3	67.32	15917.4	87486.8	195133	99512.3
CLIC1_HUMAN	Chloride intracellular channel protein 1 OS=Homo sapiens GN=CLIC1 PE=1 SV=4	6	234.47	46210.8	100886	149246	98780.7
NID1_HUMAN	Nidogen-1 OS=Homo sapiens GN=NID1 PE=1 SV=3	9	331.69	119073	70446.8	105510	98343.2
ATPB_HUMAN	ATP synthase subunit beta, mitochondrial OS=Homo sapiens GN=ATP5B PE=1 SV=3	7	361.39	20660.3	87469	182500	96876.5
TBA1B_HUMAN;TBA4A_HUMAN	Tubulin alpha-1B chain OS=Homo sapiens GN=TUBA1B PE=1 SV=1	1	568.26	19874.9	61987.2	206613	96158.3
AMD_HUMAN	Peptidyl-glycine alpha-amidating monooxygenase OS=Homo sapiens GN=PAM PE=1 SV=2	5	193.83	130595	72893.8	84917.4	96135.4
NR0B1_HUMAN	Nuclear receptor subfamily 0 group B member 1 OS=Homo sapiens GN=NR0B1 PE=1 SV=2	1	21.21	200661	72838.5	13615.7	95705.1
PDIA4_HUMAN	Protein disulfide-isomerase A4 OS=Homo sapiens GN=PDIA4 PE=1 SV=2	10	431.44	56935	71377.3	157675	95329
GDIB_HUMAN	Rab GDP dissociation inhibitor beta OS=Homo sapiens GN=GDI2 PE=1 SV=2	5	403.02	19535.2	80698.3	183083	94438.9
CO5A2_HUMAN;CO2A1_HUMAN	Collagen alpha-2(V) chain OS=Homo sapiens GN=COL5A2 PE=1 SV=3	8	259.89	63679.5	129648	85463.4	92930.4
CEMIP_HUMAN	Cell migration-inducing and hyaluronan-binding protein OS=Homo sapiens GN=CEMIP PE=1 SV=2	4	174.83	109560	82493.9	86567.3	92873.8
SMRD2_HUMAN	SWI/SNF-related matrix-associated actin-dependent regulator of chromatin subfamily D member 2 OS=Homo sapiens GN=SMARCD2 PE=1 SV=3	1	20.46	60677.7	105928	110279	92294.9
P3H1_HUMAN	Prolyl 3-hydroxylase 1 OS=Homo sapiens GN=P3H1 PE=1 SV=2	6	234.89	63445.5	94423.7	118793	92220.8
PTK7_HUMAN	Inactive tyrosine-protein kinase 7 OS=Homo sapiens GN=PTK7 PE=1 SV=2	3	106.59	54783.7	72638.5	147757	91726.4
ACTA_HUMAN	Actin, aortic smooth muscle OS=Homo sapiens GN=ACTA2 PE=1 SV=1	2	634.58	53311.7	73712.3	147321	91448.3
CBPE_HUMAN	Carboxypeptidase E OS=Homo sapiens GN=CPE PE=1 SV=1	9	328.11	82179.3	106407	85357	91314.4
SHRM3_HUMAN	Protein Shroom3 OS=Homo sapiens GN=SHROOM3 PE=1 SV=2	2	61.5	46430.4	131208	90992.9	89543.8
RSSA_HUMAN	40S ribosomal protein SA OS=Homo sapiens GN=RPSA PE=1 SV=4	3	126.05	10769.1	79130.3	177926	89275.1
GANAB_HUMAN	Neutral alpha-glucosidase AB OS=Homo sapiens GN=GANAB PE=1 SV=3	11	348.3	34848.7	97287.5	135242	89125.9
SHOC2_HUMAN	Leucine-rich repeat protein SHOC-2 OS=Homo sapiens GN=SHOC2 PE=1 SV=2	1	39.38	175547	32458.3	51889.6	86631.7
TGBR3_HUMAN	Transforming growth factor beta receptor type 3 OS=Homo sapiens GN=TGFBR3 PE=1 SV=3	3	153.58	69096.6	88699.7	100864	86220.1
CD14_HUMAN	Monocyte differentiation antigen CD14 OS=Homo sapiens GN=CD14 PE=1 SV=2	5	181.66	150820	34692	72508.9	86007.1
DPP2_HUMAN	Dipeptidyl peptidase 2 OS=Homo sapiens GN=DPP7 PE=1 SV=3	6	234.1	88408.6	64711.8	104236	85785.6
SPON1_HUMAN	Spondin-1 OS=Homo sapiens GN=SPON1 PE=1 SV=2	4	147.01	138839	41798.2	75798.8	85478.8
DPYL2_HUMAN	Dihydropyrimidinase-related protein 2 OS=Homo sapiens GN=DPYSL2 PE=1 SV=1	3	174.75	18952.2	64141.5	168581	83891.6
CAPZB_HUMAN	F-actin-capping protein subunit beta OS=Homo sapiens GN=CAPZB PE=1 SV=4	3	122.84	91745	62936.6	96314.8	83665.4
CBPQ_HUMAN	Carboxypeptidase Q OS=Homo sapiens GN=CPQ PE=1 SV=1	4	173.68	99970	68585.3	80141.4	82898.9
ACTN4_HUMAN;SPTN4_HUMAN	Alpha-actinin-4 OS=Homo sapiens GN=ACTN4 PE=1 SV=2	13	1021.7	34548.7	74341.9	139073	82654.6
GLCM_HUMAN	Glucosylceramidase OS=Homo sapiens GN=GBA PE=1 SV=3	4	184.77	56337	78706.3	112822	82621.8
FUCO_HUMAN	Tissue alpha-L-fucosidase OS=Homo sapiens GN=FUCA1 PE=1 SV=4	1	78.46	222260	9046.83	10770	80692.3
SPB6_HUMAN;SPB8_HUMAN	Serpin B6 OS=Homo sapiens GN=SERPINB6 PE=1 SV=3	5	152.6	36052.6	69090.6	134736	79959.7
BMP1_HUMAN;TLL2_HUMAN	Bone morphogenetic protein 1 OS=Homo sapiens GN=BMP1 PE=1 SV=2	7	238.41	88815.4	75721.5	72929	79155.3
PDIA6_HUMAN	Protein disulfide-isomerase A6 OS=Homo sapiens GN=PDIA6 PE=1 SV=1	5	350.38	40281	65017.7	129805	78367.8
HNRPK_HUMAN	Heterogeneous nuclear ribonucleoprotein K OS=Homo sapiens GN=HNRNPK PE=1 SV=1	5	247.77	15475.3	73833.2	145306	78204.7
GREM1_HUMAN;GREM2_HUMAN	Gremlin-1 OS=Homo sapiens GN=GREM1 PE=1 SV=1	3	127.13	104748	66998.2	61548.5	77764.9
6PGD_HUMAN	6-phosphogluconate dehydrogenase, decarboxylating OS=Homo sapiens GN=PGD PE=1 SV=3	7	268.01	24576.4	67921.5	137453	76650.3
NPTX1_HUMAN	Neuronal pentraxin-1 OS=Homo sapiens GN=NPTX1 PE=2 SV=2	6	257.37	158457	30612.8	36692.3	75253.9
TFR1_HUMAN	Transferrin receptor protein 1 OS=Homo sapiens GN=TFRC PE=1 SV=2	7	252.98	48406.2	83034.3	94164.1	75201.5
COR1C_HUMAN	Coronin-1C OS=Homo sapiens GN=CORO1C PE=1 SV=1	7	413.1	34753.7	58989	130918	74886.9
COF1_HUMAN;COF2_HUMAN	Cofilin-1 OS=Homo sapiens GN=CFL1 PE=1 SV=3	3	87.48	38763.9	78363.9	105865	74331
PEBP1_HUMAN	Phosphatidylethanolamine-binding protein 1 OS=Homo sapiens GN=PEBP1 PE=1 SV=3	3	152.44	25311.6	52200.5	144562	74024.6
SERC_HUMAN	Phosphoserine aminotransferase OS=Homo sapiens GN=PSAT1 PE=1 SV=2	5	216.63	18792.2	64640.9	137182	73538.4
TBB4B_HUMAN;TBB4A_HUMAN;TBB8_HUMAN	Tubulin beta-4B chain OS=Homo sapiens GN=TUBB4B PE=1 SV=1	2	558.53	31926.1	64165.6	122337	72809.6
COEA1_HUMAN	Collagen alpha-1(XIV) chain OS=Homo sapiens GN=COL14A1 PE=1 SV=3	6	234.43	121515	37021.7	59429.4	72655.5
CADH6_HUMAN	Cadherin-6 OS=Homo sapiens GN=CDH6 PE=1 SV=1	4	151.92	71711.5	85294.6	60474.1	72493.4
FLNC_HUMAN	Filamin-C OS=Homo sapiens GN=FLNC PE=1 SV=3	9	393.6	47172.5	58079.5	112082	72444.7
FST_HUMAN	Follistatin OS=Homo sapiens GN=FST PE=1 SV=2	5	223.39	67045.7	64125.6	84142.4	71771.2
MOES_HUMAN;RADI_HUMAN	Moesin OS=Homo sapiens GN=MSN PE=1 SV=3	5	353.54	24037.5	58396.2	131194	71209.1
CD109_HUMAN	CD109 antigen OS=Homo sapiens GN=CD109 PE=1 SV=2	6	257.79	79687.6	52140.8	80607.9	70812.1
CAD13_HUMAN	Cadherin-13 OS=Homo sapiens GN=CDH13 PE=1 SV=1	4	164.39	60981.6	69291.7	81235.5	70502.9
TARA_HUMAN	TRIO and F-actin-binding protein OS=Homo sapiens GN=TRIOBP PE=1 SV=3	1	22.37	52825.7	85112.2	72547.8	70161.9
MDHC_HUMAN	Malate dehydrogenase, cytoplasmic OS=Homo sapiens GN=MDH1 PE=1 SV=4	4	146.52	32072.5	45497.4	131751	69773.5
CAPG_HUMAN	Macrophage-capping protein OS=Homo sapiens GN=CAPG PE=1 SV=2	4	166.24	25757.5	83287.7	98822.1	69289.1
RACK1_HUMAN	Receptor of activated protein C kinase 1 OS=Homo sapiens GN=RACK1 PE=1 SV=3	3	101.93	58724.7	61760.2	86536.6	69007.2
LTBP1_HUMAN	Latent-transforming growth factor beta-binding protein 1 OS=Homo sapiens GN=LTBP1 PE=1 SV=4	4	171.45	128233	29180.9	46407	67940.2
ROA1_HUMAN;RA1L2_HUMAN	Heterogeneous nuclear ribonucleoprotein A1 OS=Homo sapiens GN=HNRNPA1 PE=1 SV=5	4	178.23	8323.22	54962.2	140010	67765
ASAH1_HUMAN	Acid ceramidase OS=Homo sapiens GN=ASAH1 PE=1 SV=5	3	115.3	80769.1	59994.2	61007.3	67256.8
UGDH_HUMAN	UDP-glucose 6-dehydrogenase OS=Homo sapiens GN=UGDH PE=1 SV=1	9	316.03	19605.1	68053.9	112392	66683.7
IBP4_HUMAN	Insulin-like growth factor-binding protein 4 OS=Homo sapiens GN=IGFBP4 PE=1 SV=2	3	88.77	61703.8	67066.8	67280.1	65350.2
MYH9_HUMAN;MYH10_HUMAN;MYH11_HUMAN;MYH14_HUMAN	Myosin-9 OS=Homo sapiens GN=MYH9 PE=1 SV=4	11	520.5	22947.2	49652	123172	65257.1
RTN4_HUMAN	Reticulon-4 OS=Homo sapiens GN=RTN4 PE=1 SV=2	3	98.73	14341.1	85351.5	95718.3	65136.9
EF1G_HUMAN	Elongation factor 1-gamma OS=Homo sapiens GN=EEF1G PE=1 SV=3	6	297.33	20910.2	60938.4	113377	65075.3
HS71L_HUMAN	Heat shock 70 kDa protein 1-like OS=Homo sapiens GN=HSPA1L PE=1 SV=2	1	452.58	23648.9	74665.8	96700.7	65005.1
CYTC_HUMAN	Cystatin-C OS=Homo sapiens GN=CST3 PE=1 SV=1	1	36.52	59898.1	71288.7	61202.6	64129.8
NUCB1_HUMAN	Nucleobindin-1 OS=Homo sapiens GN=NUCB1 PE=1 SV=4	5	233.37	64853.1	56348.2	70194.2	63798.5
CLIC4_HUMAN	Chloride intracellular channel protein 4 OS=Homo sapiens GN=CLIC4 PE=1 SV=4	3	150.63	43573.2	47217.7	97140.7	62643.9
RLA0_HUMAN;RLA0L_HUMAN	60S acidic ribosomal protein P0 OS=Homo sapiens GN=RPLP0 PE=1 SV=1	6	269.98	17192.6	59563.4	110902	62552.7
RENR_HUMAN	Renin receptor OS=Homo sapiens GN=ATP6AP2 PE=1 SV=2	4	137.33	61618.5	67779.1	57946.6	62448.1
IF4A1_HUMAN;IF4A3_HUMAN	Eukaryotic initiation factor 4A-I OS=Homo sapiens GN=EIF4A1 PE=1 SV=1	6	252.14	18665.7	55981.1	112417	62354.6
CLC11_HUMAN	C-type lectin domain family 11 member A OS=Homo sapiens GN=CLEC11A PE=1 SV=1	5	192.62	58643.9	63778.7	64396.8	62273.1
CH60_HUMAN	60 kDa heat shock protein, mitochondrial OS=Homo sapiens GN=HSPD1 PE=1 SV=2	8	315.78	20665.4	59436.3	105815	61972.2
PICAL_HUMAN	Phosphatidylinositol-binding clathrin assembly protein OS=Homo sapiens GN=PICALM PE=1 SV=2	1	31.81	164728	7472.42	12082.5	61427.6
FKBP9_HUMAN	Peptidyl-prolyl cis-trans isomerase FKBP9 OS=Homo sapiens GN=FKBP9 PE=1 SV=2	3	86.52	30194.4	62565.3	91458.5	61406.1
TGFB2_HUMAN	Transforming growth factor beta-2 OS=Homo sapiens GN=TGFB2 PE=1 SV=1	5	199.97	40245.2	68818	69423.7	59495.6
1433Z_HUMAN	14-3-3 protein zeta/delta OS=Homo sapiens GN=YWHAZ PE=1 SV=1	5	354.93	15898.2	48468.2	113590	59318.7
RS3_HUMAN	40S ribosomal protein S3 OS=Homo sapiens GN=RPS3 PE=1 SV=2	5	255.58	31557.1	39574.4	106815	59315.6
PCP_HUMAN	Lysosomal Pro-X carboxypeptidase OS=Homo sapiens GN=PRCP PE=1 SV=1	2	57.91	32408.8	64475	79191.9	58691.9
1433T_HUMAN;1433B_HUMAN	14-3-3 protein theta OS=Homo sapiens GN=YWHAQ PE=1 SV=1	5	433.56	24284.8	54515.6	97119.3	58639.9
B2MG_HUMAN	Beta-2-microglobulin OS=Homo sapiens GN=B2M PE=1 SV=1	2	74.01	63641.7	48627	62838.1	58368.9
FAM9B_HUMAN	Protein FAM9B OS=Homo sapiens GN=FAM9B PE=1 SV=1	1	27.47	85381.4	66684	21880.8	57982.1
CDAC1_HUMAN	Cytidine and dCMP deaminase domain-containing protein 1 OS=Homo sapiens GN=CDADC1 PE=2 SV=1	1	21.84	138708	6221.55	28567.5	57832.3
ADA10_HUMAN	Disintegrin and metalloproteinase domain-containing protein 10 OS=Homo sapiens GN=ADAM10 PE=1 SV=1	3	116.01	50930.4	63646	58706.2	57760.9
GSTP1_HUMAN	Glutathione S-transferase P OS=Homo sapiens GN=GSTP1 PE=1 SV=2	3	149.6	27792.4	53188.3	89870.3	56950.3
LYAG_HUMAN	Lysosomal alpha-glucosidase OS=Homo sapiens GN=GAA PE=1 SV=4	2	111.63	77123.1	39942.2	53015.6	56693.6
CAP1_HUMAN;CAP2_HUMAN	Adenylyl cyclase-associated protein 1 OS=Homo sapiens GN=CAP1 PE=1 SV=5	5	198.25	14467.3	55455.7	99852.2	56591.8
KALRN_HUMAN	Kalirin OS=Homo sapiens GN=KALRN PE=1 SV=2	1	23.31	117216	46339.2	5179.17	56244.9
G6PI_HUMAN;SIX5_HUMAN	Glucose-6-phosphate isomerase OS=Homo sapiens GN=GPI PE=1 SV=4	3	75.61	20634.1	42617.1	102392	55214.3
CSF1_HUMAN	Macrophage colony-stimulating factor 1 OS=Homo sapiens GN=CSF1 PE=1 SV=2	1	28.11	52987	51839.6	60260.8	55029.2
PRDX3_HUMAN	Thioredoxin-dependent peroxide reductase, mitochondrial OS=Homo sapiens GN=PRDX3 PE=1 SV=3	4	148.87	25707.4	51572.6	86810.4	54696.8
HNRH1_HUMAN;HNRH2_HUMAN;HNRPF_HUMAN	Heterogeneous nuclear ribonucleoprotein H OS=Homo sapiens GN=HNRNPH1 PE=1 SV=4	4	177.37	23001.7	50095.3	90603.2	54566.7
4F2_HUMAN	4F2 cell-surface antigen heavy chain OS=Homo sapiens GN=SLC3A2 PE=1 SV=3	5	212.45	52929.6	52047.1	57890.5	54289.1
GNAI2_HUMAN;GNA12_HUMAN;GNAI1_HUMAN	Guanine nucleotide-binding protein G(i) subunit alpha-2 OS=Homo sapiens GN=GNAI2 PE=1 SV=3	5	182.34	13339	59910.3	89004.4	54084.6
GLU2B_HUMAN	Glucosidase 2 subunit beta OS=Homo sapiens GN=PRKCSH PE=1 SV=2	2	97.18	100137	24451.3	36582.7	53723.8
MLH1_HUMAN	DNA mismatch repair protein Mlh1 OS=Homo sapiens GN=MLH1 PE=1 SV=1	2	51.11	20397.3	98349.5	42206.4	53651.1
SC23A_HUMAN;SC23B_HUMAN	Protein transport protein Sec23A OS=Homo sapiens GN=SEC23A PE=1 SV=2	4	139.96	51935.8	37026	70910.7	53290.9
GCSP_HUMAN	Glycine dehydrogenase (decarboxylating), mitochondrial OS=Homo sapiens GN=GLDC PE=1 SV=2	1	22.17	73413.3	26520.4	57737	52556.9
ZN423_HUMAN	Zinc finger protein 423 OS=Homo sapiens GN=ZNF423 PE=1 SV=1	1	27.94	44352.2	79950.4	32800.6	52367.7
MARCS_HUMAN	Myristoylated alanine-rich C-kinase substrate OS=Homo sapiens GN=MARCKS PE=1 SV=4	5	234.89	18164.2	46788.3	90739.1	51897.2
A2AP_HUMAN	Alpha-2-antiplasmin OS=Homo sapiens GN=SERPINF2 PE=1 SV=3	1	53.29	66592.5	80395.2	8665.28	51884.4
THIO_HUMAN	Thioredoxin OS=Homo sapiens GN=TXN PE=1 SV=3	4	113.21	50337.1	35743	66586.2	50888.7
ZN550_HUMAN	Zinc finger protein 550 OS=Homo sapiens GN=ZNF550 PE=1 SV=2	2	64.69	85984.2	26674.3	39499.1	50719.2
NPM_HUMAN	Nucleophosmin OS=Homo sapiens GN=NPM1 PE=1 SV=2	5	219.99	23105.9	43287.9	82848.9	49747.6
IMB1_HUMAN	Importin subunit beta-1 OS=Homo sapiens GN=KPNB1 PE=1 SV=2	4	203.71	11369	49084.7	87784.2	49412.6
MXRA5_HUMAN	Matrix-remodeling-associated protein 5 OS=Homo sapiens GN=MXRA5 PE=1 SV=3	8	375.64	65226.6	35367	47431.1	49341.5
SFRP1_HUMAN	Secreted frizzled-related protein 1 OS=Homo sapiens GN=SFRP1 PE=1 SV=1	3	85	60457.1	51930.5	34767	49051.5
ADHX_HUMAN	Alcohol dehydrogenase class-3 OS=Homo sapiens GN=ADH5 PE=1 SV=4	2	52.29	34095.1	60493	52102.6	48896.9
PEPD_HUMAN	Xaa-Pro dipeptidase OS=Homo sapiens GN=PEPD PE=1 SV=3	6	250.08	29740.5	38705.1	78087.3	48844.3
SHPRH_HUMAN	E3 ubiquitin-protein ligase SHPRH OS=Homo sapiens GN=SHPRH PE=1 SV=2	1	52.73	48070.3	56825	41015.1	48636.8
KS6A6_HUMAN	Ribosomal protein S6 kinase alpha-6 OS=Homo sapiens GN=RPS6KA6 PE=1 SV=1	1	26.59	129073	3509.8	12309.4	48297.5
NB5R3_HUMAN	NADH-cytochrome b5 reductase 3 OS=Homo sapiens GN=CYB5R3 PE=1 SV=3	4	167.9	17938.5	35769.4	90879.7	48195.9
TLN2_HUMAN	Talin-2 OS=Homo sapiens GN=TLN2 PE=1 SV=4	1	56.78	131228	9577.09	1560.07	47455.1
PAMR1_HUMAN	Inactive serine protease PAMR1 OS=Homo sapiens GN=PAMR1 PE=1 SV=1	4	153.37	56372.3	24601.8	59427.1	46800.4
HBA_HUMAN	Hemoglobin subunit alpha OS=Homo sapiens GN=HBA1 PE=1 SV=2	4	120.19	38017.7	66235.8	35840.5	46698
MOT10_HUMAN	Monocarboxylate transporter 10 OS=Homo sapiens GN=SLC16A10 PE=1 SV=1	1	26.58	60435.4	36498.2	42913.4	46615.7
CO9_HUMAN	Complement component C9 OS=Homo sapiens GN=C9 PE=1 SV=2	2	109.51	67774.2	39917.4	32139.1	46610.2
SRPX2_HUMAN	Sushi repeat-containing protein SRPX2 OS=Homo sapiens GN=SRPX2 PE=1 SV=1	2	68.43	33308	48316.3	57993.4	46539.2
NSMA2_HUMAN	Sphingomyelin phosphodiesterase 3 OS=Homo sapiens GN=SMPD3 PE=1 SV=1	1	24.61	32928.2	44927.9	60403.8	46086.6
APOA1_HUMAN	Apolipoprotein A-I OS=Homo sapiens GN=APOA1 PE=1 SV=1	1	37.35	22365.6	70675	42899.6	45313.4
PENK_HUMAN	Proenkephalin-A OS=Homo sapiens GN=PENK PE=1 SV=1	7	366.83	101628	14486.6	19038.7	45051.1
AAPK1_HUMAN	5'-AMP-activated protein kinase catalytic subunit alpha-1 OS=Homo sapiens GN=PRKAA1 PE=1 SV=4	1	20.21	100245	7792.63	25028.8	44355.5
LARP1_HUMAN	La-related protein 1 OS=Homo sapiens GN=LARP1 PE=1 SV=2	1	27.26	96445.4	14362.4	21463.4	44090.4
LTBP2_HUMAN	Latent-transforming growth factor beta-binding protein 2 OS=Homo sapiens GN=LTBP2 PE=1 SV=3	6	234.51	47255.7	46115.5	37766.1	43712.4
PLST_HUMAN;PLSI_HUMAN;PLSL_HUMAN	Plastin-3 OS=Homo sapiens GN=PLS3 PE=1 SV=4	7	209.44	8729.14	39154	81907.4	43263.5
SYWC_HUMAN	Tryptophan--tRNA ligase, cytoplasmic OS=Homo sapiens GN=WARS PE=1 SV=2	5	227.2	46095.3	20286.1	63059.8	43147
ZC3H3_HUMAN	Zinc finger CCCH domain-containing protein 3 OS=Homo sapiens GN=ZC3H3 PE=1 SV=3	1	25.55	55963.2	22853.8	50236.2	43017.7
RS4X_HUMAN;RS4Y1_HUMAN;RS4Y2_HUMAN	40S ribosomal protein S4, X isoform OS=Homo sapiens GN=RPS4X PE=1 SV=2	4	194.33	38242	30917	59191.5	42783.5
ARC1B_HUMAN	Actin-related protein 2/3 complex subunit 1B OS=Homo sapiens GN=ARPC1B PE=1 SV=3	4	164.12	13013.1	35669.2	77295.5	41992.6
CALX_HUMAN	Calnexin OS=Homo sapiens GN=CANX PE=1 SV=2	4	142.68	35319.7	33239.4	56939.5	41832.9
CAB45_HUMAN	45 kDa calcium-binding protein OS=Homo sapiens GN=SDF4 PE=1 SV=1	2	109.06	25171.2	52374.2	47853.9	41799.8
RS8_HUMAN	40S ribosomal protein S8 OS=Homo sapiens GN=RPS8 PE=1 SV=2	3	142.42	15719.2	31297.6	78172.9	41729.9
PRDX6_HUMAN	Peroxiredoxin-6 OS=Homo sapiens GN=PRDX6 PE=1 SV=3	5	210.66	44480.3	35490.8	44989.9	41653.6
CALD1_HUMAN	Caldesmon OS=Homo sapiens GN=CALD1 PE=1 SV=3	9	427.41	38521.2	28152.5	58144.5	41606.1
SODM_HUMAN	Superoxide dismutase [Mn], mitochondrial OS=Homo sapiens GN=SOD2 PE=1 SV=2	4	190.05	62748.7	14729.8	43001.7	40160.1
PDC6I_HUMAN	Programmed cell death 6-interacting protein OS=Homo sapiens GN=PDCD6IP PE=1 SV=1	7	339.15	14915.2	34370.7	70299.2	39861.7
PLOD2_HUMAN	Procollagen-lysine,2-oxoglutarate 5-dioxygenase 2 OS=Homo sapiens GN=PLOD2 PE=1 SV=2	4	221.9	35451.1	47256.7	35966.5	39558.1
PCBP1_HUMAN;PCBP3_HUMAN	Poly(rC)-binding protein 1 OS=Homo sapiens GN=PCBP1 PE=1 SV=2	3	166.28	24307.1	37693.8	56011.8	39337.6
SERA_HUMAN	D-3-phosphoglycerate dehydrogenase OS=Homo sapiens GN=PHGDH PE=1 SV=4	5	237.24	9434.87	32746.1	75155.1	39112
MYL6_HUMAN;MYL6B_HUMAN	Myosin light polypeptide 6 OS=Homo sapiens GN=MYL6 PE=1 SV=2	5	171.55	27858.6	25146.1	64025.4	39010
ACADV_HUMAN	Very long-chain specific acyl-CoA dehydrogenase, mitochondrial OS=Homo sapiens GN=ACADVL PE=1 SV=1	2	41.91	26806.4	57757.9	29334.2	37966.1
MAMC2_HUMAN	MAM domain-containing protein 2 OS=Homo sapiens GN=MAMDC2 PE=2 SV=3	8	318.63	30811.9	39014.8	42446.8	37424.5
NEGR1_HUMAN	Neuronal growth regulator 1 OS=Homo sapiens GN=NEGR1 PE=1 SV=3	2	75.62	29631	40147.8	42405.7	37394.8
IBP3_HUMAN	Insulin-like growth factor-binding protein 3 OS=Homo sapiens GN=IGFBP3 PE=1 SV=2	4	142.77	28642.7	25355.9	58128.6	37375.7
MRC2_HUMAN	C-type mannose receptor 2 OS=Homo sapiens GN=MRC2 PE=1 SV=2	4	132.46	23176.9	22915.5	65714	37268.8
A4_HUMAN	Amyloid-beta A4 protein OS=Homo sapiens GN=APP PE=1 SV=3	3	134.8	48695.9	18528.3	44238	37154.1
GGH_HUMAN	Gamma-glutamyl hydrolase OS=Homo sapiens GN=GGH PE=1 SV=2	3	124.4	14171.8	49273.9	44520.7	35988.8
AMPL_HUMAN	Cytosol aminopeptidase OS=Homo sapiens GN=LAP3 PE=1 SV=3	1	41.08	55038.6	36397.8	14648.9	35361.8
CATF_HUMAN	Cathepsin F OS=Homo sapiens GN=CTSF PE=1 SV=1	3	128.64	68292.3	17374.1	19498.1	35054.8
TCPE_HUMAN	T-complex protein 1 subunit epsilon OS=Homo sapiens GN=CCT5 PE=1 SV=1	4	166.11	35093.5	24824.2	44682.8	34866.8
ANXA6_HUMAN	Annexin A6 OS=Homo sapiens GN=ANXA6 PE=1 SV=3	10	395.32	9723.52	35376	59475.6	34858.4
ATX2_HUMAN	Ataxin-2 OS=Homo sapiens GN=ATXN2 PE=1 SV=2	1	27.77	9487.38	82522.7	12517.3	34842.5
GRM1C_HUMAN	GRAM domain-containing protein 1C OS=Homo sapiens GN=GRAMD1C PE=1 SV=2	1	20.84	101840	775.526	1268.41	34627.9
VDAC2_HUMAN	Voltage-dependent anion-selective channel protein 2 OS=Homo sapiens GN=VDAC2 PE=1 SV=2	5	172.22	10906	29733.2	60463.4	33700.9
BTD_HUMAN	Biotinidase OS=Homo sapiens GN=BTD PE=1 SV=2	2	99.61	28288.5	36629.3	34491	33136.3
MVD1_HUMAN	Diphosphomevalonate decarboxylase OS=Homo sapiens GN=MVD PE=1 SV=1	1	20.85	70752.7	15883.6	12146.5	32927.6
CCBE1_HUMAN	Collagen and calcium-binding EGF domain-containing protein 1 OS=Homo sapiens GN=CCBE1 PE=1 SV=1	2	89.34	19762.1	46688.4	31362.5	32604.3
ANO1_HUMAN	Anoctamin-1 OS=Homo sapiens GN=ANO1 PE=1 SV=1	1	20	64317.5	27028.5	6389.5	32578.5
TCPQ_HUMAN	T-complex protein 1 subunit theta OS=Homo sapiens GN=CCT8 PE=1 SV=4	4	196.86	24776.6	24323.2	48614.6	32571.4
NTRI_HUMAN;OPCM_HUMAN	Neurotrimin OS=Homo sapiens GN=NTM PE=1 SV=1	2	57.59	35475.1	34452.3	27237.9	32388.5
MED22_HUMAN	Mediator of RNA polymerase II transcription subunit 22 OS=Homo sapiens GN=MED22 PE=1 SV=2	1	21.38	10465.8	30875.6	55577.6	32306.3
UBA1_HUMAN	Ubiquitin-like modifier-activating enzyme 1 OS=Homo sapiens GN=UBA1 PE=1 SV=3	5	274.67	8963.82	24561.7	62959.1	32161.5
RBM10_HUMAN	RNA-binding protein 10 OS=Homo sapiens GN=RBM10 PE=1 SV=3	1	21.53	58420.4	31537.4	6250.4	32069.4
FRPD3_HUMAN	FERM and PDZ domain-containing protein 3 OS=Homo sapiens GN=FRMPD3 PE=2 SV=2	1	26.93	52985.4	17548.9	25168.2	31900.8
HNRPC_HUMAN;HNRC1_HUMAN	Heterogeneous nuclear ribonucleoproteins C1/C2 OS=Homo sapiens GN=HNRNPC PE=1 SV=4	5	230.65	7015.11	23407.2	64732.5	31718.3
MYDGF_HUMAN	Myeloid-derived growth factor OS=Homo sapiens GN=MYDGF PE=1 SV=1	1	22.65	28564.5	31716.7	34871.5	31717.6
CKAP4_HUMAN	Cytoskeleton-associated protein 4 OS=Homo sapiens GN=CKAP4 PE=1 SV=2	8	466.72	8943.63	29422.3	56761.1	31709
TRXR1_HUMAN	Thioredoxin reductase 1, cytoplasmic OS=Homo sapiens GN=TXNRD1 PE=1 SV=3	6	198.66	27615.1	23033.9	43372.6	31340.5
TLS1_HUMAN	Telomere length and silencing protein 1 homolog OS=Homo sapiens GN=C9orf78 PE=1 SV=1	1	22.43	46716.3	42135.2	4428.84	31093.5
C1QT1_HUMAN	Complement C1q tumor necrosis factor-related protein 1 OS=Homo sapiens GN=C1QTNF1 PE=1 SV=1	1	73.46	67330.2	10833.6	14601.3	30921.7
TALDO_HUMAN	Transaldolase OS=Homo sapiens GN=TALDO1 PE=1 SV=2	4	140.6	10306.1	27973	54044.3	30774.4
WDR11_HUMAN	WD repeat-containing protein 11 OS=Homo sapiens GN=WDR11 PE=1 SV=1	1	23.76	6412.27	48471.8	37387.7	30757.3
PRGC2_HUMAN	Peroxisome proliferator-activated receptor gamma coactivator 1-beta OS=Homo sapiens GN=PPARGC1B PE=1 SV=2	1	31.74	52586.1	19177.6	19194	30319.2
AATM_HUMAN	Aspartate aminotransferase, mitochondrial OS=Homo sapiens GN=GOT2 PE=1 SV=3	5	217.71	2100.2	20060.6	68062.3	30074.3
CCD80_HUMAN	Coiled-coil domain-containing protein 80 OS=Homo sapiens GN=CCDC80 PE=1 SV=1	3	139.2	15179.2	45637.1	27711.6	29509.3
DPYL3_HUMAN;DPYS_HUMAN	Dihydropyrimidinase-related protein 3 OS=Homo sapiens GN=DPYSL3 PE=1 SV=1	4	186.05	4106.27	20410.1	63347.6	29288
GLGB_HUMAN	1,4-alpha-glucan-branching enzyme OS=Homo sapiens GN=GBE1 PE=1 SV=3	4	134.7	19302	20134.9	48352.9	29263.2
PCYOX_HUMAN	Prenylcysteine oxidase 1 OS=Homo sapiens GN=PCYOX1 PE=1 SV=3	2	67.87	35453.1	36057.9	15916.7	29142.6
GRM2A_HUMAN	GRAM domain-containing protein 2A OS=Homo sapiens GN=GRAMD2A PE=1 SV=2	1	22.06	61416.1	22311.4	2795.51	28841
CAN2_HUMAN	Calpain-2 catalytic subunit OS=Homo sapiens GN=CAPN2 PE=1 SV=6	6	159.78	7343.49	20552.6	58466.5	28787.5
RD23B_HUMAN	UV excision repair protein RAD23 homolog B OS=Homo sapiens GN=RAD23B PE=1 SV=1	1	32.43	26959.4	36986.4	21938	28627.9
RCN1_HUMAN	Reticulocalbin-1 OS=Homo sapiens GN=RCN1 PE=1 SV=1	2	106.49	13187.3	31297.4	41377.7	28620.8
NPNT_HUMAN	Nephronectin OS=Homo sapiens GN=NPNT PE=2 SV=3	1	23.14	84440.9	550.852	795.494	28595.8
VPS35_HUMAN	Vacuolar protein sorting-associated protein 35 OS=Homo sapiens GN=VPS35 PE=1 SV=2	5	206.91	11861.9	19726.5	53912.1	28500.2
SRSF1_HUMAN	Serine/arginine-rich splicing factor 1 OS=Homo sapiens GN=SRSF1 PE=1 SV=2	6	211.44	17983	24884.4	42420.9	28429.4
HID1_HUMAN	Protein HID1 OS=Homo sapiens GN=HID1 PE=1 SV=1	1	40.4	14364.2	28771.7	42090.7	28408.9
CBR1_HUMAN;CBR3_HUMAN	Carbonyl reductase [NADPH] 1 OS=Homo sapiens GN=CBR1 PE=1 SV=3	6	206.94	6030.3	23450.4	53542.8	27674.5
CD248_HUMAN	Endosialin OS=Homo sapiens GN=CD248 PE=1 SV=1	3	69.55	21037.1	21541.4	39976.7	27518.4
PRDX2_HUMAN	Peroxiredoxin-2 OS=Homo sapiens GN=PRDX2 PE=1 SV=5	4	195.8	4793.05	21820.6	55113.7	27242.4
SEPR_HUMAN	Prolyl endopeptidase FAP OS=Homo sapiens GN=FAP PE=1 SV=5	4	144.51	43733.7	10643.6	27319.9	27232.4
MED16_HUMAN	Mediator of RNA polymerase II transcription subunit 16 OS=Homo sapiens GN=MED16 PE=1 SV=2	1	22.41	27238.2	29852.2	24468.5	27186.3
XRCC6_HUMAN	X-ray repair cross-complementing protein 6 OS=Homo sapiens GN=XRCC6 PE=1 SV=2	4	155	10949.2	28381.7	41725.4	27018.8
SPHM_HUMAN	N-sulphoglucosamine sulphohydrolase OS=Homo sapiens GN=SGSH PE=1 SV=1	2	111.76	33062.8	19536.1	27427.9	26675.6
RAP1A_HUMAN;RP1BL_HUMAN	Ras-related protein Rap-1A OS=Homo sapiens GN=RAP1A PE=1 SV=1	3	96.48	16334.8	36583.2	27107.8	26675.3
STC2_HUMAN	Stanniocalcin-2 OS=Homo sapiens GN=STC2 PE=1 SV=1	2	134.81	29965.8	25161	24706.3	26611
TCPG_HUMAN	T-complex protein 1 subunit gamma OS=Homo sapiens GN=CCT3 PE=1 SV=4	6	228.88	9485.48	21081.8	48866	26477.8
MFAP2_HUMAN	Microfibrillar-associated protein 2 OS=Homo sapiens GN=MFAP2 PE=2 SV=1	2	45.46	14027.4	31350.2	33593.9	26323.8
CLH1_HUMAN;CLH2_HUMAN	Clathrin heavy chain 1 OS=Homo sapiens GN=CLTC PE=1 SV=5	3	151.92	11938.1	25656.1	41292.3	26295.5
NDKB_HUMAN;NDK8_HUMAN	Nucleoside diphosphate kinase B OS=Homo sapiens GN=NME2 PE=1 SV=1	1	54.19	67963.8	3279.47	7501.32	26248.2
CO2_HUMAN	Complement C2 OS=Homo sapiens GN=C2 PE=1 SV=2	3	92.08	28597.4	13514	36503.4	26204.9
TSP3_HUMAN	Thrombospondin-3 OS=Homo sapiens GN=THBS3 PE=1 SV=1	2	136.47	25213.5	15680.8	37594.7	26163
TAGL2_HUMAN	Transgelin-2 OS=Homo sapiens GN=TAGLN2 PE=1 SV=3	3	95.16	21868.4	17073.4	39067.8	26003.2
PCDA9_HUMAN	Protocadherin alpha-9 OS=Homo sapiens GN=PCDHA9 PE=2 SV=1	1	24.15	63522.3	9860.15	3927.28	25769.9
ECHA_HUMAN	Trifunctional enzyme subunit alpha, mitochondrial OS=Homo sapiens GN=HADHA PE=1 SV=2	5	158.9	20554.2	15251.2	40808.8	25538.1
ANTR1_HUMAN	Anthrax toxin receptor 1 OS=Homo sapiens GN=ANTXR1 PE=1 SV=2	1	33.83	38301	20315.1	17723.9	25446.7
COGA1_HUMAN	Collagen alpha-1(XVI) chain OS=Homo sapiens GN=COL16A1 PE=1 SV=2	3	87.57	28625.6	23585	24021.3	25410.7
PLBL2_HUMAN	Putative phospholipase B-like 2 OS=Homo sapiens GN=PLBD2 PE=1 SV=2	4	127.26	30309.7	18391.9	26848	25183.2
LMAN2_HUMAN	Vesicular integral-membrane protein VIP36 OS=Homo sapiens GN=LMAN2 PE=1 SV=1	3	98.09	19273.8	20171.4	36072	25172.4
COFA1_HUMAN	Collagen alpha-1(XV) chain OS=Homo sapiens GN=COL15A1 PE=1 SV=2	4	164.7	9919.64	36428.4	28880.8	25076.3
1433E_HUMAN	14-3-3 protein epsilon OS=Homo sapiens GN=YWHAE PE=1 SV=1	3	212.41	16604.5	18588.7	39540.1	24911.1
NUCKS_HUMAN	Nuclear ubiquitous casein and cyclin-dependent kinase substrate 1 OS=Homo sapiens GN=NUCKS1 PE=1 SV=1	1	54.89	43516.1	15248.4	15813.4	24859.3
CO4A_HUMAN;CO4B_HUMAN	Complement C4-A OS=Homo sapiens GN=C4A PE=1 SV=2	4	150.06	34033.6	33043.9	7266.25	24781.2
HNRPD_HUMAN;ROAA_HUMAN	Heterogeneous nuclear ribonucleoprotein D0 OS=Homo sapiens GN=HNRNPD PE=1 SV=1	3	189.66	624.387	19293.2	54220.3	24712.6
SET_HUMAN;SETLP_HUMAN	Protein SET OS=Homo sapiens GN=SET PE=1 SV=3	2	114.46	11279	18977.4	43409.2	24555.2
MK_HUMAN	Midkine OS=Homo sapiens GN=MDK PE=1 SV=1	2	75.04	17651	24345.3	31642.7	24546.3
1433F_HUMAN	14-3-3 protein eta OS=Homo sapiens GN=YWHAH PE=1 SV=4	2	145.9	19656.1	28113	25565.7	24444.9
DCD_HUMAN	Dermcidin OS=Homo sapiens GN=DCD PE=1 SV=2	1	29.29	41509.5	19197.9	12048.8	24252
HNRPU_HUMAN	Heterogeneous nuclear ribonucleoprotein U OS=Homo sapiens GN=HNRNPU PE=1 SV=6	2	118.42	4604.45	11971.6	56111.4	24229.2
KCD12_HUMAN;KCD16_HUMAN;KCTD8_HUMAN	BTB/POZ domain-containing protein KCTD12 OS=Homo sapiens GN=KCTD12 PE=1 SV=1	5	174.68	4072.82	16976.5	50407.1	23818.8
LSAMP_HUMAN	Limbic system-associated membrane protein OS=Homo sapiens GN=LSAMP PE=1 SV=2	1	32.45	28756.6	29002.1	13261.4	23673.4
RL23_HUMAN	60S ribosomal protein L23 OS=Homo sapiens GN=RPL23 PE=1 SV=1	1	21.22	8594.12	24928.9	36281.3	23268.1
TRIM2_HUMAN	Tripartite motif-containing protein 2 OS=Homo sapiens GN=TRIM2 PE=1 SV=1	1	21.44	6000.82	28490.9	34195.8	22895.9
PGFRL_HUMAN	Platelet-derived growth factor receptor-like protein OS=Homo sapiens GN=PDGFRL PE=1 SV=1	2	61.26	6790.55	32527	26636	21984.5
RAB1B_HUMAN;RAB1A_HUMAN;RAB1C_HUMAN	Ras-related protein Rab-1B OS=Homo sapiens GN=RAB1B PE=1 SV=1	3	137.73	5944.08	23494.1	35641.8	21693.3
SRCRM_HUMAN	Scavenger receptor cysteine-rich domain-containing protein SCART1 OS=Homo sapiens PE=1 SV=2	1	22.87	58193	4922.45	1746.43	21620.6
GSE1_HUMAN	Genetic suppressor element 1 OS=Homo sapiens GN=GSE1 PE=1 SV=3	1	25.59	1617.34	42793.7	19984.6	21465.2
ITIH5_HUMAN	Inter-alpha-trypsin inhibitor heavy chain H5 OS=Homo sapiens GN=ITIH5 PE=2 SV=2	3	124.36	24697.4	13349.7	26151	21399.4
MEP1A_HUMAN	Meprin A subunit alpha OS=Homo sapiens GN=MEP1A PE=1 SV=2	1	23.53	10948	30539.1	22396.7	21294.6
LAMP1_HUMAN	Lysosome-associated membrane glycoprotein 1 OS=Homo sapiens GN=LAMP1 PE=1 SV=3	3	125.07	2566.97	19421.5	41793.3	21260.6
SCRIB_HUMAN	Protein scribble homolog OS=Homo sapiens GN=SCRIB PE=1 SV=4	1	50.87	8971.33	29661.9	25054.9	21229.4
PRELP_HUMAN	Prolargin OS=Homo sapiens GN=PRELP PE=1 SV=1	2	83.51	17758.2	15497.1	29496.1	20917.1
SYDC_HUMAN	Aspartate--tRNA ligase, cytoplasmic OS=Homo sapiens GN=DARS PE=1 SV=2	3	158.56	20756.5	17879.1	23946.9	20860.8
TAGL_HUMAN	Transgelin OS=Homo sapiens GN=TAGLN PE=1 SV=4	4	159.85	9952.19	26494.9	25843.6	20763.6
BICL1_HUMAN	BICD family-like cargo adapter 1 OS=Homo sapiens GN=BICDL1 PE=2 SV=2	1	20.82	11942.9	26123.5	23816.9	20627.7
ENOG_HUMAN	Gamma-enolase OS=Homo sapiens GN=ENO2 PE=1 SV=3	1	117.17	25054.7	29167.8	7495.39	20572.6
G6PD_HUMAN	Glucose-6-phosphate 1-dehydrogenase OS=Homo sapiens GN=G6PD PE=1 SV=4	2	118.84	4199.45	18238.4	39094.2	20510.7
CSRP1_HUMAN	Cysteine and glycine-rich protein 1 OS=Homo sapiens GN=CSRP1 PE=1 SV=3	1	33.92	7846.01	21471.3	32090.6	20469.3
TCPH_HUMAN	T-complex protein 1 subunit eta OS=Homo sapiens GN=CCT7 PE=1 SV=2	5	192.58	2387.22	18202.2	40750.3	20446.6
IDHC_HUMAN;IDHP_HUMAN	Isocitrate dehydrogenase [NADP] cytoplasmic OS=Homo sapiens GN=IDH1 PE=1 SV=2	3	102.43	7336.78	16429.8	36216.5	19994.4
COPB2_HUMAN	Coatomer subunit beta' OS=Homo sapiens GN=COPB2 PE=1 SV=2	4	160.35	8071.69	15507.9	36395.5	19991.7
VDAC1_HUMAN;VDAC3_HUMAN	Voltage-dependent anion-selective channel protein 1 OS=Homo sapiens GN=VDAC1 PE=1 SV=2	4	136.04	2576.94	21319.7	35701.4	19866
STOM_HUMAN;STML3_HUMAN	Erythrocyte band 7 integral membrane protein OS=Homo sapiens GN=STOM PE=1 SV=3	3	124.96	19149.1	13492.4	26898.1	19846.5
AMPN_HUMAN	Aminopeptidase N OS=Homo sapiens GN=ANPEP PE=1 SV=4	2	90.13	22035.2	13685	23702.9	19807.7
HBB_HUMAN;HBE_HUMAN;HBG1_HUMAN	Hemoglobin subunit beta OS=Homo sapiens GN=HBB PE=1 SV=2	2	70.81	22212	26734.6	10375.1	19773.9
NAMPT_HUMAN	Nicotinamide phosphoribosyltransferase OS=Homo sapiens GN=NAMPT PE=1 SV=1	3	125.31	10640.7	10896.6	37447.4	19661.5
TXND5_HUMAN	Thioredoxin domain-containing protein 5 OS=Homo sapiens GN=TXNDC5 PE=1 SV=2	4	111.69	7965.05	14807.3	35801.6	19524.6
PDGFD_HUMAN	Platelet-derived growth factor D OS=Homo sapiens GN=PDGFD PE=1 SV=1	2	125.39	11427.5	16985	30111.6	19508
NEUR1_HUMAN	Sialidase-1 OS=Homo sapiens GN=NEU1 PE=1 SV=1	2	105.32	16478.1	23479	18565.4	19507.5
STAT1_HUMAN	Signal transducer and activator of transcription 1-alpha/beta OS=Homo sapiens GN=STAT1 PE=1 SV=2	4	157.46	13196.7	14123.7	31180.4	19500.3
IGL1_HUMAN	Immunoglobulin lambda-1 light chain OS=Homo sapiens PE=1 SV=1	1	22.69	16623.3	26563.8	14949.3	19378.8
BGAL_HUMAN	Beta-galactosidase OS=Homo sapiens GN=GLB1 PE=1 SV=2	2	89.01	12330	21793.8	23859.3	19327.7
TLN1_HUMAN	Talin-1 OS=Homo sapiens GN=TLN1 PE=1 SV=3	6	227.77	11673.3	17809	28272.1	19251.5
ADAM9_HUMAN	Disintegrin and metalloproteinase domain-containing protein 9 OS=Homo sapiens GN=ADAM9 PE=1 SV=1	1	28.61	26724.7	14285.5	16607.1	19205.8
NFASC_HUMAN	Neurofascin OS=Homo sapiens GN=NFASC PE=1 SV=4	3	120.06	6863.37	18660	31998.1	19173.8
PSA6_HUMAN	Proteasome subunit alpha type-6 OS=Homo sapiens GN=PSMA6 PE=1 SV=1	2	93.03	9908.06	15838.4	31552.7	19099.7
ERP44_HUMAN;LIS1_HUMAN	Endoplasmic reticulum resident protein 44 OS=Homo sapiens GN=ERP44 PE=1 SV=1	3	136.62	8630.68	20595	27964.7	19063.5
IBP6_HUMAN	Insulin-like growth factor-binding protein 6 OS=Homo sapiens GN=IGFBP6 PE=1 SV=1	1	23.59	21239	16457.6	19480.7	19059.1
TBB2A_HUMAN	Tubulin beta-2A chain OS=Homo sapiens GN=TUBB2A PE=1 SV=1	1	463.87	23607.2	11782.7	21589.4	18993.1
CNPD1_HUMAN	Protein CNPPD1 OS=Homo sapiens GN=CNPPD1 PE=2 SV=2	1	21.39	9500.32	30110.4	17201.8	18937.5
PTPRK_HUMAN	Receptor-type tyrosine-protein phosphatase kappa OS=Homo sapiens GN=PTPRK PE=1 SV=2	2	93.35	24463.8	12228.6	19389.8	18694.1
TRY3_HUMAN	Trypsin-3 OS=Homo sapiens GN=PRSS3 PE=1 SV=2	1	61.36	33587.9	10253.7	11761.1	18534.2
EFTU_HUMAN	Elongation factor Tu, mitochondrial OS=Homo sapiens GN=TUFM PE=1 SV=2	3	82.78	8274.76	10944.8	35451.4	18223.6
DEST_HUMAN	Destrin OS=Homo sapiens GN=DSTN PE=1 SV=3	1	43.39	9568.89	21040.4	23844.7	18151.3
SEPT2_HUMAN	Septin-2 OS=Homo sapiens GN=SEPT2 PE=1 SV=1	4	167.51	2733.91	11997.1	39703.8	18144.9
CO6_HUMAN	Complement component C6 OS=Homo sapiens GN=C6 PE=1 SV=3	1	43.97	16627	22981.3	14668.7	18092.3
MFAP4_HUMAN	Microfibril-associated glycoprotein 4 OS=Homo sapiens GN=MFAP4 PE=1 SV=2	3	138.46	12644.4	6854.67	34248.5	17915.8
C1QT5_HUMAN	Complement C1q tumor necrosis factor-related protein 5 OS=Homo sapiens GN=C1QTNF5 PE=1 SV=1	1	27.55	14448.6	14218.3	25026.1	17897.7
IQGA1_HUMAN	Ras GTPase-activating-like protein IQGAP1 OS=Homo sapiens GN=IQGAP1 PE=1 SV=1	4	188.34	3501.09	15054	34987.5	17847.5
DDR1_HUMAN	Epithelial discoidin domain-containing receptor 1 OS=Homo sapiens GN=DDR1 PE=1 SV=1	1	44.78	4191.76	20356.1	28890.2	17812.7
RPC1_HUMAN	DNA-directed RNA polymerase III subunit RPC1 OS=Homo sapiens GN=POLR3A PE=1 SV=2	1	40.77	47038.1	4506.66	1857.89	17800.9
DHE3_HUMAN	Glutamate dehydrogenase 1, mitochondrial OS=Homo sapiens GN=GLUD1 PE=1 SV=2	1	24.12	11862.8	16281.4	24502.6	17549
DYH8_HUMAN	Dynein heavy chain 8, axonemal OS=Homo sapiens GN=DNAH8 PE=1 SV=2	1	26.24	30085.8	6390.7	14666.6	17047.7
FHR2_HUMAN	Complement factor H-related protein 2 OS=Homo sapiens GN=CFHR2 PE=1 SV=1	1	24.32	3948.56	20549	26516.4	17004.7
ANAG_HUMAN	Alpha-N-acetylglucosaminidase OS=Homo sapiens GN=NAGLU PE=1 SV=2	2	87	15915.6	13404.7	21294.1	16871.4
SEM3B_HUMAN	Semaphorin-3B OS=Homo sapiens GN=SEMA3B PE=2 SV=1	1	67.21	10193.1	17393.3	22889.6	16825.3
PZP_HUMAN	Pregnancy zone protein OS=Homo sapiens GN=PZP PE=1 SV=4	1	79.05	18119.6	29462.5	2536.23	16706.1
SPAG7_HUMAN	Sperm-associated antigen 7 OS=Homo sapiens GN=SPAG7 PE=1 SV=2	1	28.9	24398.4	11739.5	13903.2	16680.4
ILF2_HUMAN	Interleukin enhancer-binding factor 2 OS=Homo sapiens GN=ILF2 PE=1 SV=2	2	102.93	1090.03	10705.4	37913.4	16569.6
HS71A_HUMAN;HSP77_HUMAN	Heat shock 70 kDa protein 1A OS=Homo sapiens GN=HSPA1A PE=1 SV=1	3	609.04	17332.4	8728.42	23521.4	16527.4
DNS2A_HUMAN	Deoxyribonuclease-2-alpha OS=Homo sapiens GN=DNASE2 PE=1 SV=2	1	49.07	34602.1	7286.16	7517.6	16468.6
CAVN1_HUMAN	Caveolae-associated protein 1 OS=Homo sapiens GN=CAVIN1 PE=1 SV=1	4	307.83	10754	15159.5	23015.3	16309.6
HPLN1_HUMAN;HPLN3_HUMAN	Hyaluronan and proteoglycan link protein 1 OS=Homo sapiens GN=HAPLN1 PE=2 SV=2	3	105.51	5921.63	23362.6	19536	16273.4
RL5_HUMAN	60S ribosomal protein L5 OS=Homo sapiens GN=RPL5 PE=1 SV=3	1	50.15	29047.9	4473.59	15287.5	16269.7
VAV3_HUMAN	Guanine nucleotide exchange factor VAV3 OS=Homo sapiens GN=VAV3 PE=1 SV=1	1	22.13	16237.6	29779.3	2554.93	16190.6
VINC_HUMAN	Vinculin OS=Homo sapiens GN=VCL PE=1 SV=4	4	156.68	14878.6	8900.83	24588.7	16122.7
GBB1_HUMAN;GBB3_HUMAN	Guanine nucleotide-binding protein G(I)/G(S)/G(T) subunit beta-1 OS=Homo sapiens GN=GNB1 PE=1 SV=3	1	86.78	19941.2	14189.1	13749.7	15960
FNDC1_HUMAN	Fibronectin type III domain-containing protein 1 OS=Homo sapiens GN=FNDC1 PE=2 SV=4	4	203.48	34360.4	4997.02	7986.41	15781.3
TCPD_HUMAN	T-complex protein 1 subunit delta OS=Homo sapiens GN=CCT4 PE=1 SV=4	4	111.75	3392.74	17698.8	25704.2	15598.6
ARP2_HUMAN	Actin-related protein 2 OS=Homo sapiens GN=ACTR2 PE=1 SV=1	2	81.46	5251.33	14712.9	26817.5	15593.9
TPA_HUMAN	Tissue-type plasminogen activator OS=Homo sapiens GN=PLAT PE=1 SV=1	1	35.26	29777.2	14545.9	2265.47	15529.5
NQO1_HUMAN	NAD(P)H dehydrogenase [quinone] 1 OS=Homo sapiens GN=NQO1 PE=1 SV=1	2	82.44	2900.71	15393.9	27587.8	15294.1
UGPA_HUMAN	UTP--glucose-1-phosphate uridylyltransferase OS=Homo sapiens GN=UGP2 PE=1 SV=5	2	105.5	4733.52	12875.3	28038	15215.6
CD244_HUMAN	Natural killer cell receptor 2B4 OS=Homo sapiens GN=CD244 PE=1 SV=2	1	24.86	8289.95	24407.7	12903.8	15200.5
CALM1_HUMAN;CALL3_HUMAN	Calmodulin-1 OS=Homo sapiens GN=CALM1 PE=1 SV=1	2	53.3	9086.78	15410.2	21069.7	15188.9
NIBL1_HUMAN	Niban-like protein 1 OS=Homo sapiens GN=FAM129B PE=1 SV=3	3	117.96	9885.03	16145.4	19471.8	15167.4
MOXD1_HUMAN	DBH-like monooxygenase protein 1 OS=Homo sapiens GN=MOXD1 PE=1 SV=1	1	23.32	18501.4	12145.3	14654.6	15100.4
PSG4_HUMAN;PSG11_HUMAN	Pregnancy-specific beta-1-glycoprotein 4 OS=Homo sapiens GN=PSG4 PE=2 SV=3	2	261.38	18264.9	24292.1	2656.73	15071.3
PSB1_HUMAN	Proteasome subunit beta type-1 OS=Homo sapiens GN=PSMB1 PE=1 SV=2	2	78.41	8962.32	9153.09	26981.1	15032.2
PROS_HUMAN	Vitamin K-dependent protein S OS=Homo sapiens GN=PROS1 PE=1 SV=1	2	68.21	10891.3	13519.3	20620.5	15010.4
LEG3_HUMAN	Galectin-3 OS=Homo sapiens GN=LGALS3 PE=1 SV=5	2	66.86	8203.5	9610.15	27060.8	14958.1
CISY_HUMAN	Citrate synthase, mitochondrial OS=Homo sapiens GN=CS PE=1 SV=2	3	106.04	2744.57	13696.1	28416.4	14952.4
PSB5_HUMAN	Proteasome subunit beta type-5 OS=Homo sapiens GN=PSMB5 PE=1 SV=3	2	58.8	6336.77	23713.4	14682.6	14910.9
CFAH_HUMAN	Complement factor H OS=Homo sapiens GN=CFH PE=1 SV=4	2	87.25	17673.7	11594.8	15290.6	14853.1
DDX46_HUMAN	Probable ATP-dependent RNA helicase DDX46 OS=Homo sapiens GN=DDX46 PE=1 SV=2	1	25.56	4515.95	16629.1	23264.5	14803.2
TGM2_HUMAN	Protein-glutamine gamma-glutamyltransferase 2 OS=Homo sapiens GN=TGM2 PE=1 SV=2	4	156.99	2514.97	15966.3	25804.5	14762
MXRA8_HUMAN	Matrix remodeling-associated protein 8 OS=Homo sapiens GN=MXRA8 PE=1 SV=1	1	50.87	9582.36	17165.1	17304.3	14683.9
GSHR_HUMAN	Glutathione reductase, mitochondrial OS=Homo sapiens GN=GSR PE=1 SV=2	2	60.41	4236.6	10072.9	29480.2	14596.6
SAHH_HUMAN	Adenosylhomocysteinase OS=Homo sapiens GN=AHCY PE=1 SV=4	3	91.59	9427.05	16349.5	17987.5	14588
GPC6_HUMAN	Glypican-6 OS=Homo sapiens GN=GPC6 PE=1 SV=1	2	65.61	16996.8	10273.5	16143	14471.1
PTN_HUMAN	Pleiotrophin OS=Homo sapiens GN=PTN PE=1 SV=1	2	54.21	20010	10722.3	12578.1	14436.8
ILF3_HUMAN	Interleukin enhancer-binding factor 3 OS=Homo sapiens GN=ILF3 PE=1 SV=3	5	150.38	860.906	7236.25	35174.8	14424
CAD11_HUMAN	Cadherin-11 OS=Homo sapiens GN=CDH11 PE=2 SV=2	2	71.65	13784.1	10486.1	18681.3	14317.2
DJB11_HUMAN	DnaJ homolog subfamily B member 11 OS=Homo sapiens GN=DNAJB11 PE=1 SV=1	3	93.92	2361.42	19376.4	21199.3	14312.4
SEP11_HUMAN	Septin-11 OS=Homo sapiens GN=SEPT11 PE=1 SV=3	1	59.87	6425.89	12657.6	23661	14248.1
RHOA_HUMAN;RHOC_HUMAN	Transforming protein RhoA OS=Homo sapiens GN=RHOA PE=1 SV=1	2	57.97	1329.01	12467.1	28380.9	14059
SCRB2_HUMAN	Lysosome membrane protein 2 OS=Homo sapiens GN=SCARB2 PE=1 SV=2	1	37.89	10182.8	9918.93	21600.2	13900.7
IL6_HUMAN	Interleukin-6 OS=Homo sapiens GN=IL6 PE=1 SV=1	3	212.13	29306.4	5756.63	6063.6	13708.9
RAB5C_HUMAN;RAB5A_HUMAN	Ras-related protein Rab-5C OS=Homo sapiens GN=RAB5C PE=1 SV=2	3	171.49	2344.43	11783.9	26799.1	13642.5
HNRPQ_HUMAN	Heterogeneous nuclear ribonucleoprotein Q OS=Homo sapiens GN=SYNCRIP PE=1 SV=2	2	136.76	5505.25	9377.88	25806.7	13563.3
COPD_HUMAN	Coatomer subunit delta OS=Homo sapiens GN=ARCN1 PE=1 SV=1	2	96.37	2284.08	12945.2	25320.7	13516.6
PRS23_HUMAN	Serine protease 23 OS=Homo sapiens GN=PRSS23 PE=1 SV=1	2	64.88	10055.7	17763.3	12150.6	13323.2
HMCN1_HUMAN	Hemicentin-1 OS=Homo sapiens GN=HMCN1 PE=1 SV=2	1	23.54	18451.1	18852.6	2361.91	13221.9
FLRT2_HUMAN	Leucine-rich repeat transmembrane protein FLRT2 OS=Homo sapiens GN=FLRT2 PE=1 SV=1	3	116.86	15014.6	9555.09	15077.6	13215.8
PPIC_HUMAN	Peptidyl-prolyl cis-trans isomerase C OS=Homo sapiens GN=PPIC PE=1 SV=1	3	97.62	14099.7	8834.83	16660	13198.2
TCPA_HUMAN	T-complex protein 1 subunit alpha OS=Homo sapiens GN=TCP1 PE=1 SV=1	4	186.04	7632.12	10032.4	21316.4	12993.6
NTNG2_HUMAN	Netrin-G2 OS=Homo sapiens GN=NTNG2 PE=1 SV=2	1	24.98	12536.7	19858	6569.61	12988.1
CAV1_HUMAN	Caveolin-1 OS=Homo sapiens GN=CAV1 PE=1 SV=4	1	32.2	1644.19	17283.5	20008.8	12978.9
INT3_HUMAN	Integrator complex subunit 3 OS=Homo sapiens GN=INTS3 PE=1 SV=1	1	28.37	33691.8	3027.63	2185.99	12968.5
DERM_HUMAN	Dermatopontin OS=Homo sapiens GN=DPT PE=1 SV=2	1	36.83	12635.8	12738.9	13347.1	12907.3
1433G_HUMAN	14-3-3 protein gamma OS=Homo sapiens GN=YWHAG PE=1 SV=2	2	159.59	2985.13	10345.8	24837.7	12722.9
ARPC2_HUMAN	Actin-related protein 2/3 complex subunit 2 OS=Homo sapiens GN=ARPC2 PE=1 SV=1	2	64.18	3168.3	9822.83	25092.8	12694.6
ELN_HUMAN	Elastin OS=Homo sapiens GN=ELN PE=1 SV=3	1	36.37	36464.8	604.792	899.908	12656.5
ROA3_HUMAN	Heterogeneous nuclear ribonucleoprotein A3 OS=Homo sapiens GN=HNRNPA3 PE=1 SV=2	3	117.07	1276.27	7238.47	29281.3	12598.7
EGLN_HUMAN	Endoglin OS=Homo sapiens GN=ENG PE=1 SV=2	2	82.84	24342.8	6035.15	7411.04	12596.3
OMD_HUMAN	Osteomodulin OS=Homo sapiens GN=OMD PE=1 SV=1	2	78.05	17029	8890.84	11292.4	12404.1
EPDR1_HUMAN	Mammalian ependymin-related protein 1 OS=Homo sapiens GN=EPDR1 PE=1 SV=2	1	46.6	17289.6	10525.1	9388.1	12400.9
SLIT1_HUMAN	Slit homolog 1 protein OS=Homo sapiens GN=SLIT1 PE=2 SV=4	1	30.11	31460.4	1452.84	4274.58	12395.9
A1BG_HUMAN	Alpha-1B-glycoprotein OS=Homo sapiens GN=A1BG PE=1 SV=4	1	24.63	20143.5	16691.3	346.94	12393.9
PSG5_HUMAN	Pregnancy-specific beta-1-glycoprotein 5 OS=Homo sapiens GN=PSG5 PE=1 SV=3	1	222.87	17387.7	13862.5	5917.86	12389.3
PD1L2_HUMAN	Programmed cell death 1 ligand 2 OS=Homo sapiens GN=PDCD1LG2 PE=1 SV=2	2	72.71	19159.7	11115.7	6714.66	12330
LOXL3_HUMAN	Lysyl oxidase homolog 3 OS=Homo sapiens GN=LOXL3 PE=1 SV=1	3	140.63	8532.28	11045.1	17294.1	12290.5
ALDOC_HUMAN	Fructose-bisphosphate aldolase C OS=Homo sapiens GN=ALDOC PE=1 SV=2	1	61.89	0	8042.46	28778.7	12273.7
UBP5_HUMAN	Ubiquitin carboxyl-terminal hydrolase 5 OS=Homo sapiens GN=USP5 PE=1 SV=2	2	66.55	18637.4	7561.84	10533.3	12244.2
ECHB_HUMAN	Trifunctional enzyme subunit beta, mitochondrial OS=Homo sapiens GN=HADHB PE=1 SV=3	3	84.28	2732.53	15167.3	18823.8	12241.2
APOE_HUMAN	Apolipoprotein E OS=Homo sapiens GN=APOE PE=1 SV=1	1	31.08	3341.3	9359.32	23759.8	12153.5
CO8B_HUMAN	Complement component C8 beta chain OS=Homo sapiens GN=C8B PE=1 SV=3	1	36.85	13438.8	11551.6	11059	12016.5
RS3A_HUMAN	40S ribosomal protein S3a OS=Homo sapiens GN=RPS3A PE=1 SV=2	3	103.04	617.792	8340.83	27011.1	11989.9
MRP2_HUMAN	Canalicular multispecific organic anion transporter 1 OS=Homo sapiens GN=ABCC2 PE=1 SV=3	1	25.26	31991.8	1714.39	2183.2	11963.1
PCKGM_HUMAN	Phosphoenolpyruvate carboxykinase [GTP], mitochondrial OS=Homo sapiens GN=PCK2 PE=1 SV=3	2	62.65	0	11667.3	23899.5	11855.6
RS2_HUMAN	40S ribosomal protein S2 OS=Homo sapiens GN=RPS2 PE=1 SV=2	3	101.82	1134.7	7806.34	26387.2	11776.1
SYTL5_HUMAN	Synaptotagmin-like protein 5 OS=Homo sapiens GN=SYTL5 PE=1 SV=1	1	26.22	615.232	33409.6	1020.02	11681.6
S4A5_HUMAN	Electrogenic sodium bicarbonate cotransporter 4 OS=Homo sapiens GN=SLC4A5 PE=2 SV=2	1	26.57	14186.5	19379.5	1248.94	11605
ARSB_HUMAN	Arylsulfatase B OS=Homo sapiens GN=ARSB PE=1 SV=1	1	24.1	13767.6	10628.8	10138	11511.5
RAN_HUMAN	GTP-binding nuclear protein Ran OS=Homo sapiens GN=RAN PE=1 SV=3	1	32.37	3711.45	8854.02	21782	11449.1
SFPQ_HUMAN;NONO_HUMAN	Splicing factor, proline- and glutamine-rich OS=Homo sapiens GN=SFPQ PE=1 SV=2	2	110.7	4643.94	6933.5	22763.4	11447
ANGP1_HUMAN	Angiopoietin-1 OS=Homo sapiens GN=ANGPT1 PE=1 SV=2	3	125.99	8002.58	16637.9	9594	11411.5
COR1B_HUMAN	Coronin-1B OS=Homo sapiens GN=CORO1B PE=1 SV=1	4	123.28	2445.85	6741.06	24992.7	11393.2
PCBP2_HUMAN	Poly(rC)-binding protein 2 OS=Homo sapiens GN=PCBP2 PE=1 SV=1	1	78.78	1526.92	11003.5	21572.2	11367.5
EHD1_HUMAN	EH domain-containing protein 1 OS=Homo sapiens GN=EHD1 PE=1 SV=2	1	33.63	6485.86	20433.1	7119.69	11346.2
SC31A_HUMAN	Protein transport protein Sec31A OS=Homo sapiens GN=SEC31A PE=1 SV=3	1	47.58	4063.43	10942.9	18968.3	11324.9
OSBL7_HUMAN	Oxysterol-binding protein-related protein 7 OS=Homo sapiens GN=OSBPL7 PE=1 SV=1	1	23.12	5968.91	19312.3	8191.95	11157.7
UD3A1_HUMAN	UDP-glucuronosyltransferase 3A1 OS=Homo sapiens GN=UGT3A1 PE=2 SV=1	1	26.81	10062	9379.29	13887.3	11109.5
SIK1_HUMAN	Serine/threonine-protein kinase SIK1 OS=Homo sapiens GN=SIK1 PE=1 SV=2	1	21.47	2616.16	12511.7	18182.7	11103.5
NOV_HUMAN	Protein NOV homolog OS=Homo sapiens GN=NOV PE=1 SV=1	3	169.82	3377.97	9916.18	20006.3	11100.1
GOLM1_HUMAN	Golgi membrane protein 1 OS=Homo sapiens GN=GOLM1 PE=1 SV=1	3	94.62	14366.1	9544.96	9342.36	11084.5
DX39A_HUMAN	ATP-dependent RNA helicase DDX39A OS=Homo sapiens GN=DDX39A PE=1 SV=2	2	79.87	670.15	8376.22	24013.1	11019.8
PAI2_HUMAN	Plasminogen activator inhibitor 2 OS=Homo sapiens GN=SERPINB2 PE=1 SV=2	3	104.98	10339.9	6543.61	16047.1	10976.9
EPCR_HUMAN	Endothelial protein C receptor OS=Homo sapiens GN=PROCR PE=1 SV=1	1	33.38	10088.8	9122.26	13513.2	10908.1
GBB2_HUMAN	Guanine nucleotide-binding protein G(I)/G(S)/G(T) subunit beta-2 OS=Homo sapiens GN=GNB2 PE=1 SV=3	1	94.42	3564.23	13451.1	15641.9	10885.7
FUBP1_HUMAN	Far upstream element-binding protein 1 OS=Homo sapiens GN=FUBP1 PE=1 SV=3	2	94.04	3372.32	8737.78	20479.9	10863.3
MAP1B_HUMAN;MAP1A_HUMAN	Microtubule-associated protein 1B OS=Homo sapiens GN=MAP1B PE=1 SV=2	3	175.88	289.241	12480.2	19482	10750.5
COL12_HUMAN	Collectin-12 OS=Homo sapiens GN=COLEC12 PE=1 SV=3	2	74.03	10928.9	10216.7	11070.1	10738.6
RCN3_HUMAN	Reticulocalbin-3 OS=Homo sapiens GN=RCN3 PE=1 SV=1	1	75.58	3401.46	12821.6	15811.2	10678.1
CDC42_HUMAN	Cell division control protein 42 homolog OS=Homo sapiens GN=CDC42 PE=1 SV=2	2	76.91	4293.08	12638.9	14864.2	10598.7
MMP14_HUMAN	Matrix metalloproteinase-14 OS=Homo sapiens GN=MMP14 PE=1 SV=3	1	46.39	2864.65	8231.08	20615.4	10570.4
PKP2_HUMAN	Plakophilin-2 OS=Homo sapiens GN=PKP2 PE=1 SV=2	1	30.61	20583.9	9771.49	1328.14	10561.2
MGAT1_HUMAN	Alpha-1,3-mannosyl-glycoprotein 2-beta-N-acetylglucosaminyltransferase OS=Homo sapiens GN=MGAT1 PE=1 SV=2	1	25.59	10694.7	13066.3	7854.19	10538.4
NP1L1_HUMAN	Nucleosome assembly protein 1-like 1 OS=Homo sapiens GN=NAP1L1 PE=1 SV=1	1	35.65	8491.29	7147.47	15932.5	10523.8
THBG_HUMAN	Thyroxine-binding globulin OS=Homo sapiens GN=SERPINA7 PE=1 SV=2	1	65.74	14900.4	16267.3	282.942	10483.6
RHG01_HUMAN	Rho GTPase-activating protein 1 OS=Homo sapiens GN=ARHGAP1 PE=1 SV=1	2	75.51	2441.39	9738.14	19159	10446.2
TAF3_HUMAN	Transcription initiation factor TFIID subunit 3 OS=Homo sapiens GN=TAF3 PE=1 SV=1	1	23.58	11818.9	9476.91	9820.12	10372
RUVB1_HUMAN	RuvB-like 1 OS=Homo sapiens GN=RUVBL1 PE=1 SV=1	4	129.66	3361.92	6295.09	21297.8	10318.3
MYOF_HUMAN	Myoferlin OS=Homo sapiens GN=MYOF PE=1 SV=1	2	57.14	1235.32	10311.3	19256.2	10267.6
F10A1_HUMAN	Hsc70-interacting protein OS=Homo sapiens GN=ST13 PE=1 SV=2	2	64.61	6510.82	5858.59	18082.7	10150.7
CAZA1_HUMAN	F-actin-capping protein subunit alpha-1 OS=Homo sapiens GN=CAPZA1 PE=1 SV=3	1	106.92	1977.88	10023.7	18349	10116.9
IF5A1_HUMAN;IF5AL_HUMAN	Eukaryotic translation initiation factor 5A-1 OS=Homo sapiens GN=EIF5A PE=1 SV=2	2	78.18	1717.08	10653.7	17750.7	10040.5
NAGAB_HUMAN	Alpha-N-acetylgalactosaminidase OS=Homo sapiens GN=NAGA PE=1 SV=2	1	36	10797.2	7842.2	11375.3	10004.9
P5CS_HUMAN	Delta-1-pyrroline-5-carboxylate synthase OS=Homo sapiens GN=ALDH18A1 PE=1 SV=2	1	31.25	4298.52	13350.5	12192.7	9947.24
PSA3_HUMAN	Proteasome subunit alpha type-3 OS=Homo sapiens GN=PSMA3 PE=1 SV=2	3	103.08	8923.08	5779.13	15065.6	9922.59
GALT2_HUMAN	Polypeptide N-acetylgalactosaminyltransferase 2 OS=Homo sapiens GN=GALNT2 PE=1 SV=1	2	56.84	10439.4	9174.29	10050.4	9888
UROK_HUMAN	Urokinase-type plasminogen activator OS=Homo sapiens GN=PLAU PE=1 SV=2	3	103.9	6951.25	9245.85	13324.7	9840.6
TCPZ_HUMAN	T-complex protein 1 subunit zeta OS=Homo sapiens GN=CCT6A PE=1 SV=3	1	28.37	9019.24	8309.25	12173.9	9834.13
CO8A1_HUMAN	Collagen alpha-1(VIII) chain OS=Homo sapiens GN=COL8A1 PE=1 SV=2	4	143.74	5547.05	11437.2	12136.2	9706.81
TRFM_HUMAN	Melanotransferrin OS=Homo sapiens GN=MELTF PE=1 SV=2	1	28.3	24676.5	1621.79	2438.37	9578.88
SRSF2_HUMAN	Serine/arginine-rich splicing factor 2 OS=Homo sapiens GN=SRSF2 PE=1 SV=4	1	37.43	12245.3	8023.27	8399.05	9555.88
ADT1_HUMAN;ADT4_HUMAN	ADP/ATP translocase 1 OS=Homo sapiens GN=SLC25A4 PE=1 SV=4	2	62	3821.8	8365.52	16292	9493.1
FERM1_HUMAN	Fermitin family homolog 1 OS=Homo sapiens GN=FERMT1 PE=1 SV=1	1	22.42	20602.9	2878.61	4891.45	9457.64
ACTZ_HUMAN;ACTY_HUMAN	Alpha-centractin OS=Homo sapiens GN=ACTR1A PE=1 SV=1	2	88.78	8166.47	5789.8	14369.5	9441.93
H2A1B_HUMAN;H2A1A_HUMAN	Histone H2A type 1-B/E OS=Homo sapiens GN=HIST1H2AB PE=1 SV=2	2	53.7	13.8049	6253.26	21874.5	9380.51
SFRP2_HUMAN	Secreted frizzled-related protein 2 OS=Homo sapiens GN=SFRP2 PE=1 SV=2	2	55.8	5333.16	10028.9	12729.9	9363.98
TCPB_HUMAN	T-complex protein 1 subunit beta OS=Homo sapiens GN=CCT2 PE=1 SV=4	2	135.27	965.504	5240.79	21761	9322.43
PRDX5_HUMAN	Peroxiredoxin-5, mitochondrial OS=Homo sapiens GN=PRDX5 PE=1 SV=4	2	61.34	10607.3	4538.38	12701	9282.22
PSB3_HUMAN	Proteasome subunit beta type-3 OS=Homo sapiens GN=PSMB3 PE=1 SV=2	2	74.38	2513.41	5472.9	19682	9222.77
AATC_HUMAN	Aspartate aminotransferase, cytoplasmic OS=Homo sapiens GN=GOT1 PE=1 SV=3	2	89.84	5432.92	6200.68	15833.7	9155.76
IGG1_HUMAN	Immunoglobulin gamma-1 heavy chain OS=Homo sapiens PE=1 SV=1	1	24.18	11984.8	7680.51	7783.03	9149.45
MMS19_HUMAN	MMS19 nucleotide excision repair protein homolog OS=Homo sapiens GN=MMS19 PE=1 SV=2	1	22.25	26226.3	826.762	373.046	9142.04
CUTA_HUMAN	Protein CutA OS=Homo sapiens GN=CUTA PE=1 SV=2	1	22.12	7339.56	8348.31	11473.4	9053.76
PGRC2_HUMAN;PGRC1_HUMAN	Membrane-associated progesterone receptor component 2 OS=Homo sapiens GN=PGRMC2 PE=1 SV=1	2	60.97	5430.72	8352.95	13316	9033.23
HNRPM_HUMAN	Heterogeneous nuclear ribonucleoprotein M OS=Homo sapiens GN=HNRNPM PE=1 SV=3	2	73.47	2568.12	8158.91	16314.6	9013.89
1A03_HUMAN;1A01_HUMAN;1A11_HUMAN;1A23_HUMAN;1A80_HUMAN;HLAF_HUMAN;HLAH_HUMAN	HLA class I histocompatibility antigen, A-3 alpha chain OS=Homo sapiens GN=HLA-A PE=1 SV=2	1	295.76	8518.59	5088.94	13320.2	8975.91
VGFR1_HUMAN	Vascular endothelial growth factor receptor 1 OS=Homo sapiens GN=FLT1 PE=1 SV=2	1	28.49	11051.5	8475.45	7215.42	8914.13
EMD_HUMAN	Emerin OS=Homo sapiens GN=EMD PE=1 SV=1	2	52.93	2967.96	6464.08	17039.3	8823.77
ITIH3_HUMAN	Inter-alpha-trypsin inhibitor heavy chain H3 OS=Homo sapiens GN=ITIH3 PE=1 SV=2	1	42.06	11444.7	9834.06	5047.27	8775.36
SQOR_HUMAN	Sulfide:quinone oxidoreductase, mitochondrial OS=Homo sapiens GN=SQOR PE=1 SV=1	1	49.84	1975.2	13041.7	11069.5	8695.47
PTPRS_HUMAN	Receptor-type tyrosine-protein phosphatase S OS=Homo sapiens GN=PTPRS PE=1 SV=3	2	74.41	9278.4	5423.73	11343	8681.71
CD9_HUMAN	CD9 antigen OS=Homo sapiens GN=CD9 PE=1 SV=4	1	31.38	3648.65	11196.6	11111.6	8652.28
RNH1_HUMAN	Ribonuclease H1 OS=Homo sapiens GN=RNASEH1 PE=1 SV=2	1	22.99	13719.5	11712	454.749	8628.77
BRE1B_HUMAN	E3 ubiquitin-protein ligase BRE1B OS=Homo sapiens GN=RNF40 PE=1 SV=4	1	21.69	8939.52	16184	534.433	8552.64
MYPN_HUMAN	Myopalladin OS=Homo sapiens GN=MYPN PE=1 SV=2	1	21.84	9056.32	7988.75	8273.03	8439.37
ATS1_HUMAN	A disintegrin and metalloproteinase with thrombospondin motifs 1 OS=Homo sapiens GN=ADAMTS1 PE=1 SV=4	1	66.13	3877.91	10876.1	10563.6	8439.22
FBX42_HUMAN	F-box only protein 42 OS=Homo sapiens GN=FBXO42 PE=1 SV=1	1	37.07	24954.2	340.843	20.2315	8438.41
ARF4_HUMAN	ADP-ribosylation factor 4 OS=Homo sapiens GN=ARF4 PE=1 SV=3	2	101.29	2113.58	9396.31	13544.5	8351.47
H2B1A_HUMAN	Histone H2B type 1-A OS=Homo sapiens GN=HIST1H2BA PE=1 SV=3	1	52.59	728.89	5409.78	18741.4	8293.35
AN32B_HUMAN;AN32A_HUMAN	Acidic leucine-rich nuclear phosphoprotein 32 family member B OS=Homo sapiens GN=ANP32B PE=1 SV=1	2	90.54	2361.35	6148.88	16272.7	8260.97
PGM1_HUMAN	Phosphoglucomutase-1 OS=Homo sapiens GN=PGM1 PE=1 SV=3	3	73.58	1974.38	7141.25	15572.5	8229.38
H3C_HUMAN	Histone H3.3C OS=Homo sapiens GN=H3F3C PE=1 SV=3	1	42.69	1739.26	5750.79	17168.3	8219.45
AK1C1_HUMAN;AK1C2_HUMAN;AK1D1_HUMAN	Aldo-keto reductase family 1 member C1 OS=Homo sapiens GN=AKR1C1 PE=1 SV=1	2	68.35	4260.52	5847.56	14273.3	8127.13
DCBD2_HUMAN	Discoidin, CUB and LCCL domain-containing protein 2 OS=Homo sapiens GN=DCBLD2 PE=1 SV=1	1	37.25	7498.98	6563.95	10265.1	8109.35
GRID2_HUMAN	Glutamate receptor ionotropic, delta-2 OS=Homo sapiens GN=GRID2 PE=1 SV=2	1	24.31	669.659	17093.7	6556.37	8106.57
ETHE1_HUMAN	Persulfide dioxygenase ETHE1, mitochondrial OS=Homo sapiens GN=ETHE1 PE=1 SV=2	1	52.69	169.48	9088.3	14888.9	8048.91
KCC2D_HUMAN	Calcium/calmodulin-dependent protein kinase type II subunit delta OS=Homo sapiens GN=CAMK2D PE=1 SV=3	1	57.67	5676.54	6678.65	11487.9	7947.7
DDX3X_HUMAN;DDX3Y_HUMAN	ATP-dependent RNA helicase DDX3X OS=Homo sapiens GN=DDX3X PE=1 SV=3	2	98.96	1639.73	6405.28	15406	7816.99
ARSA_HUMAN	Arylsulfatase A OS=Homo sapiens GN=ARSA PE=1 SV=3	1	62.8	5972.15	6666.11	10670.3	7769.51
ASPH_HUMAN	Aspartyl/asparaginyl beta-hydroxylase OS=Homo sapiens GN=ASPH PE=1 SV=3	2	108.63	6815.68	5059.67	11209.6	7694.97
RS9_HUMAN	40S ribosomal protein S9 OS=Homo sapiens GN=RPS9 PE=1 SV=3	6	197.8	1793.4	6074.3	15164.8	7677.5
PAPP1_HUMAN	Pappalysin-1 OS=Homo sapiens GN=PAPPA PE=1 SV=3	1	36.91	14090.5	3465.64	5460.48	7672.2
EXT2_HUMAN	Exostosin-2 OS=Homo sapiens GN=EXT2 PE=1 SV=1	1	32.77	5755.08	6567.77	10626.1	7649.64
FA10_HUMAN	Coagulation factor X OS=Homo sapiens GN=F10 PE=1 SV=2	1	37.62	16287	3738.11	2915.49	7646.86
FNBP4_HUMAN	Formin-binding protein 4 OS=Homo sapiens GN=FNBP4 PE=1 SV=3	1	21.03	2037.93	19085.6	1569.05	7564.2
RS21_HUMAN	40S ribosomal protein S21 OS=Homo sapiens GN=RPS21 PE=1 SV=1	1	26.33	22568.9	0.12293	45.5707	7538.2
RL11_HUMAN	60S ribosomal protein L11 OS=Homo sapiens GN=RPL11 PE=1 SV=2	1	51.73	1160.15	6947.48	14494.4	7534.01
AP2M1_HUMAN	AP-2 complex subunit mu OS=Homo sapiens GN=AP2M1 PE=1 SV=2	3	93.87	8286.67	3030.25	11265.3	7527.41
WNT7B_HUMAN	Protein Wnt-7b OS=Homo sapiens GN=WNT7B PE=2 SV=2	1	33.57	2790.73	10750.2	8624	7388.32
EF1D_HUMAN	Elongation factor 1-delta OS=Homo sapiens GN=EEF1D PE=1 SV=5	3	126.56	1740.96	5292.74	14997.7	7343.79
INHBA_HUMAN	Inhibin beta A chain OS=Homo sapiens GN=INHBA PE=1 SV=2	1	48.66	7979.26	7020.77	6959.94	7319.99
COMP_HUMAN	Cartilage oligomeric matrix protein OS=Homo sapiens GN=COMP PE=1 SV=2	2	85.68	12713.3	6822.36	2390.19	7308.62
OST48_HUMAN	Dolichyl-diphosphooligosaccharide--protein glycosyltransferase 48 kDa subunit OS=Homo sapiens GN=DDOST PE=1 SV=4	2	110.9	1709.94	6523.5	13646.6	7293.34
RS14_HUMAN	40S ribosomal protein S14 OS=Homo sapiens GN=RPS14 PE=1 SV=3	1	47.08	18.3907	6142.12	15659.6	7273.38
PDGFC_HUMAN	Platelet-derived growth factor C OS=Homo sapiens GN=PDGFC PE=1 SV=2	1	57.86	5159.63	5832.81	10663.7	7218.73
DNA2_HUMAN	DNA replication ATP-dependent helicase/nuclease DNA2 OS=Homo sapiens GN=DNA2 PE=1 SV=3	1	24.3	6422.59	6932.45	8063.51	7139.51
HPSE_HUMAN	Heparanase OS=Homo sapiens GN=HPSE PE=1 SV=2	1	21.68	21306	5.43653	0	7103.83
DDAH2_HUMAN	N(G),N(G)-dimethylarginine dimethylaminohydrolase 2 OS=Homo sapiens GN=DDAH2 PE=1 SV=1	2	49.54	8445.15	4201.54	8616.05	7087.58
H4_HUMAN	Histone H4 OS=Homo sapiens GN=HIST1H4A PE=1 SV=2	2	60.48	6150.96	960.623	14009.8	7040.45
MY18B_HUMAN	Unconventional myosin-XVIIIb OS=Homo sapiens GN=MYO18B PE=1 SV=1	1	21.95	10713	6426.03	3779.26	6972.75
AMPB_HUMAN	Aminopeptidase B OS=Homo sapiens GN=RNPEP PE=1 SV=2	1	26.08	1331.97	4972.09	14605.5	6969.85
GDIA_HUMAN	Rab GDP dissociation inhibitor alpha OS=Homo sapiens GN=GDI1 PE=1 SV=2	1	178.8	0	3924.62	16957	6960.53
SUMO2_HUMAN	Small ubiquitin-related modifier 2 OS=Homo sapiens GN=SUMO2 PE=1 SV=3	1	29.23	391.597	7161.11	13315.2	6955.98
ITIH1_HUMAN	Inter-alpha-trypsin inhibitor heavy chain H1 OS=Homo sapiens GN=ITIH1 PE=1 SV=3	1	70.71	11250.1	9013.56	439.422	6901.03
QOR_HUMAN	Quinone oxidoreductase OS=Homo sapiens GN=CRYZ PE=1 SV=1	1	28.48	3834.15	5201.65	11209.4	6748.41
F13A_HUMAN	Coagulation factor XIII A chain OS=Homo sapiens GN=F13A1 PE=1 SV=4	1	41.85	5977.74	8274.17	5884.72	6712.21
N42L2_HUMAN	NEDD4-binding protein 2-like 2 OS=Homo sapiens GN=N4BP2L2 PE=1 SV=1	1	32.99	692.465	5687.3	13389.1	6589.63
CSPG4_HUMAN	Chondroitin sulfate proteoglycan 4 OS=Homo sapiens GN=CSPG4 PE=1 SV=2	1	34.07	7986.14	5056.68	6691.72	6578.18
ASCC3_HUMAN	Activating signal cointegrator 1 complex subunit 3 OS=Homo sapiens GN=ASCC3 PE=1 SV=3	1	21.3	11260.9	5630.85	2802.5	6564.74
RAB14_HUMAN	Ras-related protein Rab-14 OS=Homo sapiens GN=RAB14 PE=1 SV=4	2	78.64	3895.42	6907.25	8664.68	6489.12
SRC8_HUMAN	Src substrate cortactin OS=Homo sapiens GN=CTTN PE=1 SV=2	1	24.42	1480.53	6013.93	11870.7	6455.04
COPG1_HUMAN;COPG2_HUMAN	Coatomer subunit gamma-1 OS=Homo sapiens GN=COPG1 PE=1 SV=1	3	175.08	3160.61	5092.84	11014.3	6422.59
DTNB_HUMAN	Dystrobrevin beta OS=Homo sapiens GN=DTNB PE=1 SV=1	1	20.65	12433.6	1395.8	5385.37	6404.92
MMP10_HUMAN	Stromelysin-2 OS=Homo sapiens GN=MMP10 PE=1 SV=1	1	210.98	0	2401.42	16807	6402.79
PTGR1_HUMAN	Prostaglandin reductase 1 OS=Homo sapiens GN=PTGR1 PE=1 SV=2	2	67.3	3716.11	3473.81	11967.5	6385.8
NCOR1_HUMAN	Nuclear receptor corepressor 1 OS=Homo sapiens GN=NCOR1 PE=1 SV=2	1	27.26	5777.44	11573.7	1770.79	6373.97
CELR1_HUMAN	Cadherin EGF LAG seven-pass G-type receptor 1 OS=Homo sapiens GN=CELSR1 PE=1 SV=1	1	20.85	8906.23	1724.78	8488.2	6373.07
SRCRL_HUMAN	Soluble scavenger receptor cysteine-rich domain-containing protein SSC5D OS=Homo sapiens GN=SSC5D PE=1 SV=3	1	38.28	7860.03	6412.9	4804.49	6359.14
VP26A_HUMAN	Vacuolar protein sorting-associated protein 26A OS=Homo sapiens GN=VPS26A PE=1 SV=2	1	31.67	645.796	3139.63	15291.2	6358.87
UTP20_HUMAN	Small subunit processome component 20 homolog OS=Homo sapiens GN=UTP20 PE=1 SV=3	1	20.15	14899.9	2605.79	1406.78	6304.16
RL17_HUMAN	60S ribosomal protein L17 OS=Homo sapiens GN=RPL17 PE=1 SV=3	1	25.12	479.277	4512.01	13888.1	6293.13
SIAE_HUMAN	Sialate O-acetylesterase OS=Homo sapiens GN=SIAE PE=1 SV=1	1	27.05	10098.2	3929.24	4827.98	6285.15
ZN462_HUMAN	Zinc finger protein 462 OS=Homo sapiens GN=ZNF462 PE=1 SV=3	1	26.25	5082.21	3899.11	9743.31	6241.54
CYS1_HUMAN	Cystin-1 OS=Homo sapiens GN=CYS1 PE=1 SV=1	1	32.31	15060.3	2350.07	1267.45	6225.95
PCDGF_HUMAN	Protocadherin gamma-B3 OS=Homo sapiens GN=PCDHGB3 PE=1 SV=4	1	29.92	2758.16	7642.42	8231.8	6210.79
CATS_HUMAN	Cathepsin S OS=Homo sapiens GN=CTSS PE=1 SV=3	1	42.75	12830.6	1881.4	3832.37	6181.47
MAEL_HUMAN	Protein maelstrom homolog OS=Homo sapiens GN=MAEL PE=1 SV=1	1	28.25	1094.58	4902.92	12537.6	6178.36
LMAN1_HUMAN	Protein ERGIC-53 OS=Homo sapiens GN=LMAN1 PE=1 SV=2	1	47.8	1309.97	6330.91	10750.2	6130.37
UBP14_HUMAN	Ubiquitin carboxyl-terminal hydrolase 14 OS=Homo sapiens GN=USP14 PE=1 SV=3	1	37.74	301.677	5689.86	12269.8	6087.12
SYNE2_HUMAN	Nesprin-2 OS=Homo sapiens GN=SYNE2 PE=1 SV=3	1	26.85	14707.3	1373.99	2008.52	6029.93
PP2AA_HUMAN	Serine/threonine-protein phosphatase 2A catalytic subunit alpha isoform OS=Homo sapiens GN=PPP2CA PE=1 SV=1	1	23.85	1811.19	6036.89	10232.7	6026.93
ACSL1_HUMAN	Long-chain-fatty-acid--CoA ligase 1 OS=Homo sapiens GN=ACSL1 PE=1 SV=1	1	25.81	7588.67	4434.36	6019.14	6014.06
RASD1_HUMAN	Dexamethasone-induced Ras-related protein 1 OS=Homo sapiens GN=RASD1 PE=1 SV=1	1	24.89	17254.7	708.701	0	5987.81
NRP1_HUMAN	Neuropilin-1 OS=Homo sapiens GN=NRP1 PE=1 SV=3	1	56.88	8164.65	3863.84	5828.88	5952.45
SEPT9_HUMAN	Septin-9 OS=Homo sapiens GN=SEPT9 PE=1 SV=2	2	54.2	709.653	4520.34	12483.5	5904.51
DNJA2_HUMAN	DnaJ homolog subfamily A member 2 OS=Homo sapiens GN=DNAJA2 PE=1 SV=1	1	45.54	12050.8	1655.71	3904.94	5870.47
THIM_HUMAN	3-ketoacyl-CoA thiolase, mitochondrial OS=Homo sapiens GN=ACAA2 PE=1 SV=2	1	41.4	652.048	4406.6	12527	5861.87
PSMD2_HUMAN	26S proteasome non-ATPase regulatory subunit 2 OS=Homo sapiens GN=PSMD2 PE=1 SV=3	3	159.6	711.016	7593.39	9264.79	5856.4
PGFRB_HUMAN	Platelet-derived growth factor receptor beta OS=Homo sapiens GN=PDGFRB PE=1 SV=1	1	39.2	6563.2	3993.19	7009.64	5855.34
CLIP1_HUMAN	CAP-Gly domain-containing linker protein 1 OS=Homo sapiens GN=CLIP1 PE=1 SV=2	1	21.89	14762.6	961.927	1713.67	5812.75
YETS4_HUMAN	YEATS domain-containing protein 4 OS=Homo sapiens GN=YEATS4 PE=1 SV=1	1	27.77	15044.5	1168.84	1188.55	5800.62
SEPT7_HUMAN;SEP14_HUMAN	Septin-7 OS=Homo sapiens GN=SEPT7 PE=1 SV=2	1	91.57	3058.21	5211.88	9040.63	5770.24
B4GA1_HUMAN	Beta-1,4-glucuronyltransferase 1 OS=Homo sapiens GN=B4GAT1 PE=1 SV=1	2	59.15	4703.35	6981.74	5594.02	5759.71
RS25_HUMAN	40S ribosomal protein S25 OS=Homo sapiens GN=RPS25 PE=1 SV=1	1	44.54	1826.76	5125.09	10202.6	5718.14
DCR1C_HUMAN	Protein artemis OS=Homo sapiens GN=DCLRE1C PE=1 SV=2	1	26.1	2515.51	5714.41	8822.43	5684.12
UB2V1_HUMAN	Ubiquitin-conjugating enzyme E2 variant 1 OS=Homo sapiens GN=UBE2V1 PE=1 SV=2	1	21.15	1763.67	4365.3	10919.2	5682.71
RL8_HUMAN	60S ribosomal protein L8 OS=Homo sapiens GN=RPL8 PE=1 SV=2	1	32.15	6269.72	3373.84	7165.15	5602.9
FUBP2_HUMAN;FUBP3_HUMAN	Far upstream element-binding protein 2 OS=Homo sapiens GN=KHSRP PE=1 SV=4	3	129.28	1727.22	4062.47	11014.5	5601.39
CNN2_HUMAN	Calponin-2 OS=Homo sapiens GN=CNN2 PE=1 SV=4	1	68.58	1178.81	2869.77	12669.7	5572.77
ISLR_HUMAN	Immunoglobulin superfamily containing leucine-rich repeat protein OS=Homo sapiens GN=ISLR PE=2 SV=1	2	84.53	2506.52	3528.16	10632.8	5555.83
TEAD3_HUMAN	Transcriptional enhancer factor TEF-5 OS=Homo sapiens GN=TEAD3 PE=1 SV=2	1	21.81	3553.37	12648.2	380.157	5527.24
PRDM1_HUMAN	PR domain zinc finger protein 1 OS=Homo sapiens GN=PRDM1 PE=1 SV=2	1	25.41	5883.68	10074.1	623.199	5527
LAMA5_HUMAN	Laminin subunit alpha-5 OS=Homo sapiens GN=LAMA5 PE=1 SV=8	1	75.21	4029.77	6330.5	6216.2	5525.49
PRS10_HUMAN	26S proteasome regulatory subunit 10B OS=Homo sapiens GN=PSMC6 PE=1 SV=1	2	64.27	2262.74	2826.04	11391.9	5493.55
EWS_HUMAN	RNA-binding protein EWS OS=Homo sapiens GN=EWSR1 PE=1 SV=1	1	39.37	2579.72	7826.05	5977.84	5461.2
MVP_HUMAN	Major vault protein OS=Homo sapiens GN=MVP PE=1 SV=4	2	99.77	1535.3	2242.61	12545.4	5441.11
EXT1_HUMAN	Exostosin-1 OS=Homo sapiens GN=EXT1 PE=1 SV=2	1	25.09	5133.03	5536.74	5634.21	5434.66
DBF4B_HUMAN	Protein DBF4 homolog B OS=Homo sapiens GN=DBF4B PE=1 SV=1	1	24.88	2014.09	6720.58	7541.24	5425.3
CNN3_HUMAN	Calponin-3 OS=Homo sapiens GN=CNN3 PE=1 SV=1	1	32.24	0	6864.88	9388.55	5417.81
BRE1A_HUMAN	E3 ubiquitin-protein ligase BRE1A OS=Homo sapiens GN=RNF20 PE=1 SV=2	1	23.61	0	4031.14	12215.6	5415.59
SDCB1_HUMAN	Syntenin-1 OS=Homo sapiens GN=SDCBP PE=1 SV=1	1	68.66	358.382	2585.61	13276.3	5406.77
MAP4_HUMAN	Microtubule-associated protein 4 OS=Homo sapiens GN=MAP4 PE=1 SV=3	1	31.04	1173.29	3912.27	11021.6	5369.06
SIAT6_HUMAN	CMP-N-acetylneuraminate-beta-1,4-galactoside alpha-2,3-sialyltransferase OS=Homo sapiens GN=ST3GAL3 PE=1 SV=1	1	22.76	15449.1	209.364	324.194	5327.54
RISC_HUMAN	Retinoid-inducible serine carboxypeptidase OS=Homo sapiens GN=SCPEP1 PE=1 SV=1	1	52.8	7592.85	3166.05	5139.97	5299.62
HSP13_HUMAN	Heat shock 70 kDa protein 13 OS=Homo sapiens GN=HSPA13 PE=1 SV=1	1	34	5592.62	4394.94	5886.11	5291.22
DSCAM_HUMAN	Down syndrome cell adhesion molecule OS=Homo sapiens GN=DSCAM PE=1 SV=2	1	34.36	12647.4	2004.98	1088.98	5247.12
ZNF26_HUMAN	Zinc finger protein 26 OS=Homo sapiens GN=ZNF26 PE=1 SV=3	1	32.24	6935.12	4657.75	4106.19	5233.02
PTN23_HUMAN	Tyrosine-protein phosphatase non-receptor type 23 OS=Homo sapiens GN=PTPN23 PE=1 SV=1	1	38.44	731.527	5324.44	9582.83	5212.93
ITIH4_HUMAN	Inter-alpha-trypsin inhibitor heavy chain H4 OS=Homo sapiens GN=ITIH4 PE=1 SV=4	1	29.23	10588.3	4620.22	383.607	5197.38
DKK1_HUMAN	Dickkopf-related protein 1 OS=Homo sapiens GN=DKK1 PE=1 SV=1	1	56.52	2753.83	6645.22	6159.02	5186.02
SPEE_HUMAN	Spermidine synthase OS=Homo sapiens GN=SRM PE=1 SV=1	1	25.46	4791.96	3511.65	7243.74	5182.45
PTBP1_HUMAN;PTBP3_HUMAN	Polypyrimidine tract-binding protein 1 OS=Homo sapiens GN=PTBP1 PE=1 SV=1	1	29.33	5634.52	3787.35	6123.13	5181.67
CC121_HUMAN	Coiled-coil domain-containing protein 121 OS=Homo sapiens GN=CCDC121 PE=1 SV=1	1	30.95	2179.46	7322.95	5948.03	5150.15
HNRPR_HUMAN	Heterogeneous nuclear ribonucleoprotein R OS=Homo sapiens GN=HNRNPR PE=1 SV=1	1	97.63	1076.36	3948.9	10415.1	5146.77
DLDH_HUMAN	Dihydrolipoyl dehydrogenase, mitochondrial OS=Homo sapiens GN=DLD PE=1 SV=2	1	48.96	1788.37	3595.45	10014.6	5132.81
AP1B1_HUMAN	AP-1 complex subunit beta-1 OS=Homo sapiens GN=AP1B1 PE=1 SV=2	1	61.71	685.696	3832.7	10760.4	5092.95
MSH2_HUMAN	DNA mismatch repair protein Msh2 OS=Homo sapiens GN=MSH2 PE=1 SV=1	1	24.19	7221.27	7954.3	55.5112	5077.03
IGF2_HUMAN	Insulin-like growth factor II OS=Homo sapiens GN=IGF2 PE=1 SV=1	1	33.98	2652.51	1247.1	11211.5	5037.02
CO7_HUMAN	Complement component C7 OS=Homo sapiens GN=C7 PE=1 SV=2	1	23.49	5303.74	8186.15	1602.34	5030.74
VITRN_HUMAN	Vitrin OS=Homo sapiens GN=VIT PE=2 SV=1	2	77.8	1675.46	6831.58	6555.89	5020.98
ILEU_HUMAN	Leukocyte elastase inhibitor OS=Homo sapiens GN=SERPINB1 PE=1 SV=1	1	32.87	2366.3	8097.31	4590.88	5018.16
PARK7_HUMAN	Protein/nucleic acid deglycase DJ-1 OS=Homo sapiens GN=PARK7 PE=1 SV=2	1	27.34	914.708	4253.17	9867.01	5011.63
EST1A_HUMAN	Telomerase-binding protein EST1A OS=Homo sapiens GN=SMG6 PE=1 SV=2	1	22.49	14978.4	0	0	4992.79
RL18A_HUMAN	60S ribosomal protein L18a OS=Homo sapiens GN=RPL18A PE=1 SV=2	1	57.6	3055.97	3026.97	8825.53	4969.49
VAT1_HUMAN	Synaptic vesicle membrane protein VAT-1 homolog OS=Homo sapiens GN=VAT1 PE=1 SV=2	1	23.29	12950.1	269.861	1576.95	4932.29
SMYD5_HUMAN	SET and MYND domain-containing protein 5 OS=Homo sapiens GN=SMYD5 PE=1 SV=2	1	21.81	48.9842	6498.66	8087.87	4878.5
THIL_HUMAN	Acetyl-CoA acetyltransferase, mitochondrial OS=Homo sapiens GN=ACAT1 PE=1 SV=1	1	58.06	89.3257	4008.48	10496.2	4864.65
P4HA2_HUMAN	Prolyl 4-hydroxylase subunit alpha-2 OS=Homo sapiens GN=P4HA2 PE=1 SV=1	1	21.5	969.162	12617.8	979.178	4855.37
KAPCA_HUMAN;KAPCB_HUMAN	cAMP-dependent protein kinase catalytic subunit alpha OS=Homo sapiens GN=PRKACA PE=1 SV=2	2	62.49	1567.07	3776.08	9198.89	4847.35
LAMA1_HUMAN;LAMA2_HUMAN	Laminin subunit alpha-1 OS=Homo sapiens GN=LAMA1 PE=1 SV=2	2	69.58	3599.61	4078.77	6516.32	4731.57
RAI1_HUMAN	Retinoic acid-induced protein 1 OS=Homo sapiens GN=RAI1 PE=1 SV=2	1	23.98	10496.5	966.84	2701.66	4721.67
MTAP_HUMAN	S-methyl-5'-thioadenosine phosphorylase OS=Homo sapiens GN=MTAP PE=1 SV=2	1	30.1	25.1568	2230.71	11778.5	4678.12
H15_HUMAN	Histone H1.5 OS=Homo sapiens GN=HIST1H1B PE=1 SV=3	2	68.53	1927.03	1534.83	10549.9	4670.57
METRL_HUMAN	Meteorin-like protein OS=Homo sapiens GN=METRNL PE=2 SV=1	1	26.48	1541.25	6165.18	6268.45	4658.29
PCDGK_HUMAN	Protocadherin gamma-C3 OS=Homo sapiens GN=PCDHGC3 PE=1 SV=1	1	31.17	4512.13	3085.44	6333.96	4643.84
CRTC3_HUMAN	CREB-regulated transcription coactivator 3 OS=Homo sapiens GN=CRTC3 PE=1 SV=2	1	21.82	2889.59	3266.75	7772.02	4642.79
NUCB2_HUMAN	Nucleobindin-2 OS=Homo sapiens GN=NUCB2 PE=1 SV=2	1	29.7	3021.05	4064.06	6825.98	4637.03
APOH_HUMAN	Beta-2-glycoprotein 1 OS=Homo sapiens GN=APOH PE=1 SV=3	1	38.05	3239.97	7518.74	2964.13	4574.28
PRS7_HUMAN	26S proteasome regulatory subunit 7 OS=Homo sapiens GN=PSMC2 PE=1 SV=3	2	149.08	899.316	5004.51	7771.11	4558.31
RS6_HUMAN	40S ribosomal protein S6 OS=Homo sapiens GN=RPS6 PE=1 SV=1	2	69.6	1286.53	3130.02	9064	4493.52
RL13_HUMAN	60S ribosomal protein L13 OS=Homo sapiens GN=RPL13 PE=1 SV=4	2	66.27	4353.95	3259.57	5844.29	4485.94
T106B_HUMAN	Transmembrane protein 106B OS=Homo sapiens GN=TMEM106B PE=1 SV=2	1	23.93	840.956	4450.32	8099.84	4463.71
COMT_HUMAN	Catechol O-methyltransferase OS=Homo sapiens GN=COMT PE=1 SV=2	1	22.63	220.906	5332.05	7798.35	4450.44
ZFR2_HUMAN	Zinc finger RNA-binding protein 2 OS=Homo sapiens GN=ZFR2 PE=2 SV=3	1	24.21	4784.24	4098.05	4373.04	4418.44
CPNE3_HUMAN;CPNE2_HUMAN	Copine-3 OS=Homo sapiens GN=CPNE3 PE=1 SV=1	2	70.08	189.559	3652.49	9399.96	4414
EHD2_HUMAN	EH domain-containing protein 2 OS=Homo sapiens GN=EHD2 PE=1 SV=2	3	117.71	4471	3386.52	5349.29	4402.27
PLD3_HUMAN	Phospholipase D3 OS=Homo sapiens GN=PLD3 PE=1 SV=1	1	33.29	1191	4576.56	7180.56	4316.04
OLA1_HUMAN	Obg-like ATPase 1 OS=Homo sapiens GN=OLA1 PE=1 SV=2	2	66.16	119.571	4535.05	8247.66	4300.76
BACH_HUMAN	Cytosolic acyl coenzyme A thioester hydrolase OS=Homo sapiens GN=ACOT7 PE=1 SV=3	1	20.49	0	4113.17	8784.59	4299.25
RAC1_HUMAN	Ras-related C3 botulinum toxin substrate 1 OS=Homo sapiens GN=RAC1 PE=1 SV=1	1	46.07	243.563	4990.38	7540.03	4257.99
CRYL1_HUMAN	Lambda-crystallin homolog OS=Homo sapiens GN=CRYL1 PE=1 SV=3	1	23.62	0	1379.22	11359.2	4246.15
DPP3_HUMAN	Dipeptidyl peptidase 3 OS=Homo sapiens GN=DPP3 PE=1 SV=2	1	32.75	968.626	2926.65	8712.83	4202.7
DDX17_HUMAN;DDX5_HUMAN	Probable ATP-dependent RNA helicase DDX17 OS=Homo sapiens GN=DDX17 PE=1 SV=2	2	70.75	2452.41	3529.41	6568.43	4183.42
RRAS_HUMAN	Ras-related protein R-Ras OS=Homo sapiens GN=RRAS PE=1 SV=1	1	25.5	2723.91	4012.65	5790.98	4175.85
UBP47_HUMAN	Ubiquitin carboxyl-terminal hydrolase 47 OS=Homo sapiens GN=USP47 PE=1 SV=3	1	29.91	5590.81	2551.46	4360.53	4167.6
CC112_HUMAN	Coiled-coil domain-containing protein 112 OS=Homo sapiens GN=CCDC112 PE=1 SV=2	1	20.46	6508.51	2257.92	3707.52	4157.98
MICU1_HUMAN	Calcium uptake protein 1, mitochondrial OS=Homo sapiens GN=MICU1 PE=1 SV=1	1	26.78	398.723	5221.05	6849.93	4156.57
FUMH_HUMAN	Fumarate hydratase, mitochondrial OS=Homo sapiens GN=FH PE=1 SV=3	1	34.59	151.081	3382.32	8892.35	4141.92
PTPRG_HUMAN	Receptor-type tyrosine-protein phosphatase gamma OS=Homo sapiens GN=PTPRG PE=1 SV=4	1	33.77	3493.34	3257.3	5394.84	4048.49
KINH_HUMAN	Kinesin-1 heavy chain OS=Homo sapiens GN=KIF5B PE=1 SV=1	1	61.04	935.126	9858.37	1301.09	4031.53
ZCH13_HUMAN	Zinc finger CCHC domain-containing protein 13 OS=Homo sapiens GN=ZCCHC13 PE=1 SV=1	1	26.47	2396.54	9437.74	246.221	4026.83
AL7A1_HUMAN	Alpha-aminoadipic semialdehyde dehydrogenase OS=Homo sapiens GN=ALDH7A1 PE=1 SV=5	1	20.18	0	3348.65	8675.64	4008.1
ACOXL_HUMAN	Acyl-coenzyme A oxidase-like protein OS=Homo sapiens GN=ACOXL PE=2 SV=3	1	28.77	5556.74	3350.01	3092.17	3999.64
PRDX4_HUMAN	Peroxiredoxin-4 OS=Homo sapiens GN=PRDX4 PE=1 SV=1	1	151.86	76.3116	3693.39	8224.4	3998.03
TETN_HUMAN	Tetranectin OS=Homo sapiens GN=CLEC3B PE=1 SV=3	1	23.01	5192.21	6180.38	570.72	3981.1
SYT16_HUMAN	Synaptotagmin-16 OS=Homo sapiens GN=SYT16 PE=1 SV=2	1	22.09	10028.4	309.367	1570.06	3969.27
NSD1_HUMAN	Histone-lysine N-methyltransferase, H3 lysine-36 and H4 lysine-20 specific OS=Homo sapiens GN=NSD1 PE=1 SV=1	1	20.79	725.964	5168.96	5855.81	3916.91
APAF_HUMAN	Apoptotic protease-activating factor 1 OS=Homo sapiens GN=APAF1 PE=1 SV=2	1	23.44	202.753	3668.2	7871.82	3914.26
MSMB_HUMAN	Beta-microseminoprotein OS=Homo sapiens GN=MSMB PE=1 SV=1	1	21.84	1137.5	882.595	9713.44	3911.18
ARPC5_HUMAN	Actin-related protein 2/3 complex subunit 5 OS=Homo sapiens GN=ARPC5 PE=1 SV=3	1	38.02	2352.18	2316.94	6977.85	3882.32
CA123_HUMAN	UPF0587 protein C1orf123 OS=Homo sapiens GN=C1orf123 PE=1 SV=1	1	37.66	684.317	2837	8066.91	3862.74
TEX2_HUMAN	Testis-expressed protein 2 OS=Homo sapiens GN=TEX2 PE=1 SV=2	1	31.01	5136.69	3314.18	3107.92	3852.93
GOSR1_HUMAN	Golgi SNAP receptor complex member 1 OS=Homo sapiens GN=GOSR1 PE=1 SV=1	1	31.11	10061	708.335	766.707	3845.34
FAAA_HUMAN	Fumarylacetoacetase OS=Homo sapiens GN=FAH PE=1 SV=2	2	63.57	885.776	2343.79	8254.95	3828.17
OAF_HUMAN	Out at first protein homolog OS=Homo sapiens GN=OAF PE=2 SV=1	1	40.72	2604.78	3676.53	5196.97	3826.09
SRSF3_HUMAN	Serine/arginine-rich splicing factor 3 OS=Homo sapiens GN=SRSF3 PE=1 SV=1	1	44.22	451.938	2990.22	7961.07	3801.08
CPNE1_HUMAN	Copine-1 OS=Homo sapiens GN=CPNE1 PE=1 SV=1	2	79.69	355.295	4136.8	6883.86	3791.98
PVR_HUMAN	Poliovirus receptor OS=Homo sapiens GN=PVR PE=1 SV=2	1	24.22	1160.28	4615.86	5520.12	3765.42
OLFL1_HUMAN	Olfactomedin-like protein 1 OS=Homo sapiens GN=OLFML1 PE=1 SV=2	1	72.39	1586.61	5506.34	4176.58	3756.51
SCRN1_HUMAN	Secernin-1 OS=Homo sapiens GN=SCRN1 PE=1 SV=2	1	47.68	5482.43	1297.01	4421.76	3733.73
CUBN_HUMAN	Cubilin OS=Homo sapiens GN=CUBN PE=1 SV=5	1	23.95	1525.46	3221.26	6351.18	3699.3
GSTO1_HUMAN	Glutathione S-transferase omega-1 OS=Homo sapiens GN=GSTO1 PE=1 SV=2	1	32.85	334.428	2636.84	8055.3	3675.52
CLN5_HUMAN	Ceroid-lipofuscinosis neuronal protein 5 OS=Homo sapiens GN=CLN5 PE=1 SV=2	1	23.96	4594.03	2968.81	3412.89	3658.58
ETFA_HUMAN	Electron transfer flavoprotein subunit alpha, mitochondrial OS=Homo sapiens GN=ETFA PE=1 SV=1	1	44.82	0	3118.38	7851.57	3656.65
CD59_HUMAN	CD59 glycoprotein OS=Homo sapiens GN=CD59 PE=1 SV=1	1	34.24	2035.51	4241.4	4627.66	3634.85
AMBP_HUMAN	Protein AMBP OS=Homo sapiens GN=AMBP PE=1 SV=1	1	23.89	5436.35	5071.3	396.285	3634.65
ML12A_HUMAN	Myosin regulatory light chain 12A OS=Homo sapiens GN=MYL12A PE=1 SV=2	1	40.06	605.463	3158.78	7132.43	3632.22
SEC13_HUMAN	Protein SEC13 homolog OS=Homo sapiens GN=SEC13 PE=1 SV=3	1	47.92	502.18	1612.65	8745.4	3620.08
RAB10_HUMAN;RAB12_HUMAN;RAB13_HUMAN;RAB15_HUMAN;RAB43_HUMAN	Ras-related protein Rab-10 OS=Homo sapiens GN=RAB10 PE=1 SV=1	3	149.82	1051.49	3575.96	6193.01	3606.82
AIFM1_HUMAN	Apoptosis-inducing factor 1, mitochondrial OS=Homo sapiens GN=AIFM1 PE=1 SV=1	2	58.28	857.367	2863.5	7065.87	3595.58
HDGF_HUMAN	Hepatoma-derived growth factor OS=Homo sapiens GN=HDGF PE=1 SV=1	1	21.29	748.328	1879.78	8127.89	3585.33
FA81B_HUMAN	Protein FAM81B OS=Homo sapiens GN=FAM81B PE=1 SV=3	1	23.02	1893.63	4333.41	4515.34	3580.79
ARPC4_HUMAN	Actin-related protein 2/3 complex subunit 4 OS=Homo sapiens GN=ARPC4 PE=1 SV=3	1	27.87	2775.45	2447.79	5450.55	3557.93
MED11_HUMAN	Mediator of RNA polymerase II transcription subunit 11 OS=Homo sapiens GN=MED11 PE=1 SV=2	1	27.15	4551.61	2772.25	3308.67	3544.18
CRLF1_HUMAN	Cytokine receptor-like factor 1 OS=Homo sapiens GN=CRLF1 PE=1 SV=1	2	87.52	7012.72	1762.46	1817.7	3530.96
PP1A_HUMAN	Serine/threonine-protein phosphatase PP1-alpha catalytic subunit OS=Homo sapiens GN=PPP1CA PE=1 SV=1	2	65.84	989.945	2447	7135.02	3523.99
TTLL5_HUMAN	Tubulin polyglutamylase TTLL5 OS=Homo sapiens GN=TTLL5 PE=1 SV=3	1	25.92	15.0208	6001.89	4536.13	3517.68
CAZA2_HUMAN	F-actin-capping protein subunit alpha-2 OS=Homo sapiens GN=CAPZA2 PE=1 SV=3	1	68.65	1501.53	2972.96	6043.38	3505.96
ATX2L_HUMAN	Ataxin-2-like protein OS=Homo sapiens GN=ATXN2L PE=1 SV=2	1	23.24	7323.52	0	3178.64	3500.72
MK13_HUMAN	Mitogen-activated protein kinase 13 OS=Homo sapiens GN=MAPK13 PE=1 SV=1	1	27.49	6277.09	3778.51	439.787	3498.46
2AAA_HUMAN	Serine/threonine-protein phosphatase 2A 65 kDa regulatory subunit A alpha isoform OS=Homo sapiens GN=PPP2R1A PE=1 SV=4	1	32.99	3275.8	3054.43	4116.32	3482.18
ZBTB4_HUMAN	Zinc finger and BTB domain-containing protein 4 OS=Homo sapiens GN=ZBTB4 PE=1 SV=3	1	20.02	4057.72	2131.2	4213.58	3467.5
TENX_HUMAN	Tenascin-X OS=Homo sapiens GN=TNXB PE=1 SV=4	2	55.07	1928.24	5285.34	3155.85	3456.48
C1QT3_HUMAN	Complement C1q tumor necrosis factor-related protein 3 OS=Homo sapiens GN=C1QTNF3 PE=1 SV=1	2	64.63	3539.83	4111.53	2717.16	3456.17
AAAT_HUMAN	Neutral amino acid transporter B(0) OS=Homo sapiens GN=SLC1A5 PE=1 SV=2	2	88.52	1165.23	4660.16	4538.13	3454.5
RL7_HUMAN	60S ribosomal protein L7 OS=Homo sapiens GN=RPL7 PE=1 SV=1	1	66.15	0	2081.68	8163.74	3415.14
CLAT_HUMAN	Choline O-acetyltransferase OS=Homo sapiens GN=CHAT PE=1 SV=4	1	23.42	16.9449	9448.68	708.936	3391.52
ERAP1_HUMAN	Endoplasmic reticulum aminopeptidase 1 OS=Homo sapiens GN=ERAP1 PE=1 SV=3	1	47.31	2261.57	3370.91	4328.57	3320.35
PSA2_HUMAN	Proteasome subunit alpha type-2 OS=Homo sapiens GN=PSMA2 PE=1 SV=2	1	54.48	459.754	2143.29	7240.36	3281.13
HINT1_HUMAN	Histidine triad nucleotide-binding protein 1 OS=Homo sapiens GN=HINT1 PE=1 SV=2	1	25.73	4615.06	2291.27	2927.05	3277.79
XAGE1_HUMAN	X antigen family member 1 OS=Homo sapiens GN=XAGE1A PE=1 SV=3	1	27.46	9028.17	622.241	126.706	3259.04
RL7A_HUMAN	60S ribosomal protein L7a OS=Homo sapiens GN=RPL7A PE=1 SV=2	1	38.5	90.8351	1409.41	8219.09	3239.78
GPDM_HUMAN	Glycerol-3-phosphate dehydrogenase, mitochondrial OS=Homo sapiens GN=GPD2 PE=1 SV=3	2	54.06	1445.98	2597.93	5589.32	3211.07
MET16_HUMAN	U6 small nuclear RNA (adenine-(43)-N(6))-methyltransferase OS=Homo sapiens GN=METTL16 PE=1 SV=2	1	27.27	814.559	2232.86	6515.58	3187.67
ZN781_HUMAN	Zinc finger protein 781 OS=Homo sapiens GN=ZNF781 PE=2 SV=1	1	22.44	2296.53	3117.05	4102.77	3172.12
RET4_HUMAN	Retinol-binding protein 4 OS=Homo sapiens GN=RBP4 PE=1 SV=3	2	62.33	6775.34	1786.68	927.704	3163.24
DFNA5_HUMAN	Non-syndromic hearing impairment protein 5 OS=Homo sapiens GN=DFNA5 PE=1 SV=2	1	36.25	688.016	1580.85	7218.72	3162.53
HNRDL_HUMAN	Heterogeneous nuclear ribonucleoprotein D-like OS=Homo sapiens GN=HNRNPDL PE=1 SV=3	1	137.52	121.454	3107.14	6256.96	3161.85
ETFB_HUMAN	Electron transfer flavoprotein subunit beta OS=Homo sapiens GN=ETFB PE=1 SV=3	2	74.29	3091.87	1495.66	4853.26	3146.93
SC24D_HUMAN	Protein transport protein Sec24D OS=Homo sapiens GN=SEC24D PE=1 SV=2	1	36.58	1237.34	2362.78	5786.69	3128.94
PSG1_HUMAN;PSG8_HUMAN	Pregnancy-specific beta-1-glycoprotein 1 OS=Homo sapiens GN=PSG1 PE=1 SV=1	1	177.63	1767.95	5169.38	2438.18	3125.17
ERF1_HUMAN	Eukaryotic peptide chain release factor subunit 1 OS=Homo sapiens GN=ETF1 PE=1 SV=3	1	39.7	320.259	2583.35	6433.72	3112.44
TPM3_HUMAN;TPM1_HUMAN	Tropomyosin alpha-3 chain OS=Homo sapiens GN=TPM3 PE=1 SV=2	1	104.02	608.392	4494.25	4214.14	3105.59
ATG2A_HUMAN	Autophagy-related protein 2 homolog A OS=Homo sapiens GN=ATG2A PE=1 SV=3	1	30.8	6246.99	1688.35	1318.66	3084.67
RB11A_HUMAN	Ras-related protein Rab-11A OS=Homo sapiens GN=RAB11A PE=1 SV=3	1	25.97	0	3397.3	5771.71	3056.34
IF2G_HUMAN	Eukaryotic translation initiation factor 2 subunit 3 OS=Homo sapiens GN=EIF2S3 PE=1 SV=3	1	21.41	172.812	2468.18	6420.85	3020.61
SARDH_HUMAN	Sarcosine dehydrogenase, mitochondrial OS=Homo sapiens GN=SARDH PE=1 SV=1	1	24.2	4833.48	422.777	3790.71	3015.65
S10A4_HUMAN	Protein S100-A4 OS=Homo sapiens GN=S100A4 PE=1 SV=1	1	22.12	2532.9	1905.37	4543.36	2993.87
RL27A_HUMAN	60S ribosomal protein L27a OS=Homo sapiens GN=RPL27A PE=1 SV=2	1	38.23	873.772	1402.55	6695.65	2990.66
ASPG_HUMAN	N(4)-(beta-N-acetylglucosaminyl)-L-asparaginase OS=Homo sapiens GN=AGA PE=1 SV=2	1	48.89	3045.81	3017.52	2823.77	2962.37
ESYT1_HUMAN	Extended synaptotagmin-1 OS=Homo sapiens GN=ESYT1 PE=1 SV=1	2	60.77	189.132	1350.16	7306.67	2948.65
SNX9_HUMAN	Sorting nexin-9 OS=Homo sapiens GN=SNX9 PE=1 SV=1	1	48.56	641.851	1395.14	6767.26	2934.75
BASI_HUMAN	Basigin OS=Homo sapiens GN=BSG PE=1 SV=2	1	33.48	286.61	4794.63	3717.66	2932.97
RGMB_HUMAN	RGM domain family member B OS=Homo sapiens GN=RGMB PE=1 SV=3	1	26.52	2318.17	3868.63	2552.71	2913.17
NOE1_HUMAN	Noelin OS=Homo sapiens GN=OLFM1 PE=1 SV=4	1	36.53	2636.45	2603.25	3445.47	2895.06
BC11B_HUMAN	B-cell lymphoma/leukemia 11B OS=Homo sapiens GN=BCL11B PE=1 SV=1	2	41.29	3075.79	2800	2808.51	2894.76
ANGL4_HUMAN	Angiopoietin-related protein 4 OS=Homo sapiens GN=ANGPTL4 PE=1 SV=2	1	30.15	1492.15	1608.26	5569.83	2890.08
FUCO2_HUMAN	Plasma alpha-L-fucosidase OS=Homo sapiens GN=FUCA2 PE=1 SV=2	1	36.97	2541.74	3587.9	2367.1	2832.25
OSMR_HUMAN	Oncostatin-M-specific receptor subunit beta OS=Homo sapiens GN=OSMR PE=1 SV=1	1	22.16	1115.55	3058.89	4272.25	2815.56
PRS8_HUMAN	26S proteasome regulatory subunit 8 OS=Homo sapiens GN=PSMC5 PE=1 SV=1	1	94.63	968.054	2381.25	5092.78	2814.03
FIBB_HUMAN	Fibrinogen beta chain OS=Homo sapiens GN=FGB PE=1 SV=2	1	31.12	3809.87	3372.23	1212.47	2798.19
WTIP_HUMAN	Wilms tumor protein 1-interacting protein OS=Homo sapiens GN=WTIP PE=1 SV=3	1	22.65	3765.98	3124.43	1498.06	2796.16
NEUS_HUMAN	Neuroserpin OS=Homo sapiens GN=SERPINI1 PE=1 SV=1	2	65.37	3772.27	1364.55	3208.75	2781.86
OR2B3_HUMAN	Putative olfactory receptor 2B3 OS=Homo sapiens GN=OR2B3 PE=3 SV=1	1	23.74	5487.33	2841.72	0	2776.35
ADRM1_HUMAN	Proteasomal ubiquitin receptor ADRM1 OS=Homo sapiens GN=ADRM1 PE=1 SV=2	1	50.91	3639.07	2455.3	1995.57	2696.65
SYAC_HUMAN	Alanine--tRNA ligase, cytoplasmic OS=Homo sapiens GN=AARS PE=1 SV=2	1	27.16	269.313	2046.77	5724.54	2680.21
ASM3A_HUMAN	Acid sphingomyelinase-like phosphodiesterase 3a OS=Homo sapiens GN=SMPDL3A PE=1 SV=2	1	23.09	3183.15	2168.49	2610.92	2654.19
CCD18_HUMAN	Coiled-coil domain-containing protein 18 OS=Homo sapiens GN=CCDC18 PE=1 SV=1	1	41.74	1024.01	3019.04	3873.21	2638.75
DDAH1_HUMAN	N(G),N(G)-dimethylarginine dimethylaminohydrolase 1 OS=Homo sapiens GN=DDAH1 PE=1 SV=3	1	21.69	1178.08	1919.68	4749.85	2615.87
FBXW8_HUMAN	F-box/WD repeat-containing protein 8 OS=Homo sapiens GN=FBXW8 PE=1 SV=2	1	24.08	2127.45	5179.17	536.556	2614.39
GLYM_HUMAN	Serine hydroxymethyltransferase, mitochondrial OS=Homo sapiens GN=SHMT2 PE=1 SV=3	1	21.15	2502.2	1196.62	4044.21	2581.01
S3TC1_HUMAN	SH3 domain and tetratricopeptide repeat-containing protein 1 OS=Homo sapiens GN=SH3TC1 PE=1 SV=3	1	26.09	184.721	2316.19	5220.63	2573.85
TCPR2_HUMAN	Tectonin beta-propeller repeat-containing protein 2 OS=Homo sapiens GN=TECPR2 PE=1 SV=4	1	28.85	7367.12	109.98	0	2492.37
RALYL_HUMAN;RALY_HUMAN	RNA-binding Raly-like protein OS=Homo sapiens GN=RALYL PE=1 SV=2	1	38.21	108.464	1618.22	5715.51	2480.73
BIEA_HUMAN	Biliverdin reductase A OS=Homo sapiens GN=BLVRA PE=1 SV=2	1	37.59	504.982	2482.03	4373.55	2453.52
RL15_HUMAN	60S ribosomal protein L15 OS=Homo sapiens GN=RPL15 PE=1 SV=2	1	36.53	685.387	2437.12	4214.89	2445.8
ZN638_HUMAN	Zinc finger protein 638 OS=Homo sapiens GN=ZNF638 PE=1 SV=2	1	45.07	1348.09	4137.8	1810.27	2432.05
MSH3_HUMAN	DNA mismatch repair protein Msh3 OS=Homo sapiens GN=MSH3 PE=1 SV=4	1	23.27	7291.89	0	0	2430.63
RL14_HUMAN	60S ribosomal protein L14 OS=Homo sapiens GN=RPL14 PE=1 SV=4	1	70.12	887.346	3540.99	2751.79	2393.38
NOP56_HUMAN	Nucleolar protein 56 OS=Homo sapiens GN=NOP56 PE=1 SV=4	1	20.99	3483.5	3170.43	490.006	2381.31
POP1_HUMAN	Ribonucleases P/MRP protein subunit POP1 OS=Homo sapiens GN=POP1 PE=1 SV=2	2	65.49	4625.62	869.467	1634.92	2376.67
CD151_HUMAN	CD151 antigen OS=Homo sapiens GN=CD151 PE=1 SV=3	1	20.08	1518.44	2749.26	2854.49	2374.06
P4HA1_HUMAN	Prolyl 4-hydroxylase subunit alpha-1 OS=Homo sapiens GN=P4HA1 PE=1 SV=2	1	47.87	369.651	938.448	5806.92	2371.67
SND1_HUMAN	Staphylococcal nuclease domain-containing protein 1 OS=Homo sapiens GN=SND1 PE=1 SV=1	1	44.45	793.41	2129.34	4129.78	2350.84
ASNA_HUMAN	ATPase ASNA1 OS=Homo sapiens GN=ASNA1 PE=1 SV=2	1	24.67	0	1351.35	5689.61	2346.99
NAGK_HUMAN	N-acetyl-D-glucosamine kinase OS=Homo sapiens GN=NAGK PE=1 SV=4	1	66.91	0.329245	1139.42	5733.72	2291.16
ITPR2_HUMAN	Inositol 1,4,5-trisphosphate receptor type 2 OS=Homo sapiens GN=ITPR2 PE=1 SV=2	1	22.22	397.344	1948.69	4493.53	2279.86
PUR6_HUMAN	Multifunctional protein ADE2 OS=Homo sapiens GN=PAICS PE=1 SV=3	2	99.45	232.944	684.19	5894.85	2270.66
LKHA4_HUMAN	Leukotriene A-4 hydrolase OS=Homo sapiens GN=LTA4H PE=1 SV=2	1	26.81	49.0558	1304.84	5355.84	2236.58
RABX5_HUMAN	Rab5 GDP/GTP exchange factor OS=Homo sapiens GN=RABGEF1 PE=1 SV=2	1	22.13	0	6524.14	108.193	2210.78
TCTP_HUMAN	Translationally-controlled tumor protein OS=Homo sapiens GN=TPT1 PE=1 SV=1	1	21.16	347.841	1760.68	4499.8	2202.77
ADK_HUMAN	Adenosine kinase OS=Homo sapiens GN=ADK PE=1 SV=2	1	25.84	0	2114.09	4477.31	2197.13
H12_HUMAN;H11_HUMAN	Histone H1.2 OS=Homo sapiens GN=HIST1H1C PE=1 SV=2	2	81.09	1293.98	857.841	4436.56	2196.13
XPOT_HUMAN	Exportin-T OS=Homo sapiens GN=XPOT PE=1 SV=2	1	32.11	0	1809.64	4771.24	2193.63
1B44_HUMAN	HLA class I histocompatibility antigen, B-44 alpha chain OS=Homo sapiens GN=HLA-B PE=1 SV=1	1	215.07	500.066	3127.79	2942.97	2190.28
S22AP_HUMAN	Solute carrier family 22 member 25 OS=Homo sapiens GN=SLC22A25 PE=2 SV=2	1	33.84	828.638	5584.78	154.802	2189.41
RPN1_HUMAN	Dolichyl-diphosphooligosaccharide--protein glycosyltransferase subunit 1 OS=Homo sapiens GN=RPN1 PE=1 SV=1	2	70.18	284.319	1571.94	4706.47	2187.58
DECR_HUMAN	2,4-dienoyl-CoA reductase, mitochondrial OS=Homo sapiens GN=DECR1 PE=1 SV=1	1	35.83	0	2190.16	4342.84	2177.67
SF3B2_HUMAN	Splicing factor 3B subunit 2 OS=Homo sapiens GN=SF3B2 PE=1 SV=2	1	32.88	0	3161.79	3330.41	2164.07
AP2A1_HUMAN	AP-2 complex subunit alpha-1 OS=Homo sapiens GN=AP2A1 PE=1 SV=3	1	24.99	0	1449.29	5035.5	2161.6
ACOC_HUMAN	Cytoplasmic aconitate hydratase OS=Homo sapiens GN=ACO1 PE=1 SV=3	1	33.54	0	1492	4927.14	2139.71
APOL2_HUMAN	Apolipoprotein L2 OS=Homo sapiens GN=APOL2 PE=1 SV=1	2	80.66	1778.73	2158.92	2449.8	2129.15
RECQ1_HUMAN	ATP-dependent DNA helicase Q1 OS=Homo sapiens GN=RECQL PE=1 SV=3	1	20.26	1180.84	1370.81	3814.16	2121.93
DBNL_HUMAN	Drebrin-like protein OS=Homo sapiens GN=DBNL PE=1 SV=1	1	62.56	512.003	2617.03	3176.84	2101.96
IMDH2_HUMAN	Inosine-5'-monophosphate dehydrogenase 2 OS=Homo sapiens GN=IMPDH2 PE=1 SV=2	1	29.09	178.102	2421.55	3669.83	2089.83
SYRC_HUMAN	Arginine--tRNA ligase, cytoplasmic OS=Homo sapiens GN=RARS PE=1 SV=2	1	23.05	510.55	2037.02	3677.19	2074.92
CC136_HUMAN	Coiled-coil domain-containing protein 136 OS=Homo sapiens GN=CCDC136 PE=1 SV=3	1	23.69	1260.39	2524.63	2380.9	2055.3
PLIN3_HUMAN	Perilipin-3 OS=Homo sapiens GN=PLIN3 PE=1 SV=3	1	55.95	0.796654	2986.96	3170.14	2052.63
ATL1_HUMAN	ADAMTS-like protein 1 OS=Homo sapiens GN=ADAMTSL1 PE=1 SV=4	1	35.14	3098.06	1163.95	1815.13	2025.71
GAS8_HUMAN	Growth arrest-specific protein 8 OS=Homo sapiens GN=GAS8 PE=1 SV=1	1	22.52	291.831	1668.35	4110.43	2023.54
PKCB1_HUMAN	Protein kinase C-binding protein 1 OS=Homo sapiens GN=ZMYND8 PE=1 SV=2	1	20.74	1745.44	803.41	3501.53	2016.79
PRS6A_HUMAN	26S proteasome regulatory subunit 6A OS=Homo sapiens GN=PSMC3 PE=1 SV=3	1	36.65	0	1663.72	4318.82	1994.18
GBB4_HUMAN	Guanine nucleotide-binding protein subunit beta-4 OS=Homo sapiens GN=GNB4 PE=1 SV=3	1	73.57	673.011	2578.5	2725.26	1992.26
ANS1A_HUMAN	Ankyrin repeat and SAM domain-containing protein 1A OS=Homo sapiens GN=ANKS1A PE=1 SV=4	1	20.15	52.6598	1744.92	4148.07	1981.89
TXNL1_HUMAN	Thioredoxin-like protein 1 OS=Homo sapiens GN=TXNL1 PE=1 SV=3	1	36.77	0	1736.43	4184.16	1973.53
FBRL_HUMAN	rRNA 2'-O-methyltransferase fibrillarin OS=Homo sapiens GN=FBL PE=1 SV=2	1	31.28	327.443	724.2	4826.2	1959.28
TWF1_HUMAN	Twinfilin-1 OS=Homo sapiens GN=TWF1 PE=1 SV=3	1	22.78	1584.28	1260.56	3011.74	1952.19
ACSL4_HUMAN	Long-chain-fatty-acid--CoA ligase 4 OS=Homo sapiens GN=ACSL4 PE=1 SV=2	1	20.93	3805.8	166.065	1823.99	1931.95
EIF3B_HUMAN	Eukaryotic translation initiation factor 3 subunit B OS=Homo sapiens GN=EIF3B PE=1 SV=3	1	75.45	1197.03	1311.8	3236.06	1914.96
CXL17_HUMAN	C-X-C motif chemokine 17 OS=Homo sapiens GN=CXCL17 PE=1 SV=1	1	30.83	2709.08	357.396	2627.38	1897.95
TRPM5_HUMAN	Transient receptor potential cation channel subfamily M member 5 OS=Homo sapiens GN=TRPM5 PE=2 SV=1	1	24.29	857.386	1767.43	2924.78	1849.86
BGLR_HUMAN	Beta-glucuronidase OS=Homo sapiens GN=GUSB PE=1 SV=2	1	24.64	424.589	2747.25	2340.77	1837.54
LPAR1_HUMAN	Lysophosphatidic acid receptor 1 OS=Homo sapiens GN=LPAR1 PE=1 SV=3	1	54.32	366.004	2327.57	2805.82	1833.13
PUR9_HUMAN	Bifunctional purine biosynthesis protein PURH OS=Homo sapiens GN=ATIC PE=1 SV=3	1	53.38	938.043	1328.7	3225.5	1830.75
UBAC1_HUMAN	Ubiquitin-associated domain-containing protein 1 OS=Homo sapiens GN=UBAC1 PE=1 SV=1	1	27.59	620.415	2127.32	2738.23	1828.65
PSD11_HUMAN	26S proteasome non-ATPase regulatory subunit 11 OS=Homo sapiens GN=PSMD11 PE=1 SV=3	1	29.64	21.8869	1240.8	4202.37	1821.68
NUP50_HUMAN	Nuclear pore complex protein Nup50 OS=Homo sapiens GN=NUP50 PE=1 SV=2	1	25.44	1056.05	1721.16	2650.59	1809.27
ADH1A_HUMAN	Alcohol dehydrogenase 1A OS=Homo sapiens GN=ADH1A PE=1 SV=2	1	29.19	0	537.847	4831.91	1789.92
RS5_HUMAN	40S ribosomal protein S5 OS=Homo sapiens GN=RPS5 PE=1 SV=4	1	25.87	3720.88	639.243	937.628	1765.92
RL18_HUMAN	60S ribosomal protein L18 OS=Homo sapiens GN=RPL18 PE=1 SV=2	1	49.42	603.951	1513.51	3171.43	1762.97
EMSY_HUMAN	BRCA2-interacting transcriptional repressor EMSY OS=Homo sapiens GN=EMSY PE=1 SV=2	1	23.13	968.69	2016.49	2277.54	1754.24
NOG1_HUMAN	Nucleolar GTP-binding protein 1 OS=Homo sapiens GN=GTPBP4 PE=1 SV=3	1	26.86	251.962	1336.76	3650.28	1746.33
LRC40_HUMAN	Leucine-rich repeat-containing protein 40 OS=Homo sapiens GN=LRRC40 PE=1 SV=1	1	35.78	2307.6	532.976	2386.46	1742.34
UBP24_HUMAN	Ubiquitin carboxyl-terminal hydrolase 24 OS=Homo sapiens GN=USP24 PE=1 SV=3	1	20.04	5061.78	51.3122	42.7781	1718.62
AGM1_HUMAN	Phosphoacetylglucosamine mutase OS=Homo sapiens GN=PGM3 PE=1 SV=1	1	36.71	0	1888.42	3230.35	1706.25
CRK_HUMAN	Adapter molecule crk OS=Homo sapiens GN=CRK PE=1 SV=2	1	66.25	0	860.588	4203.11	1687.9
ANK3_HUMAN	Ankyrin-3 OS=Homo sapiens GN=ANK3 PE=1 SV=3	1	27.59	1454.02	1656.93	1943.53	1684.83
HORN_HUMAN	Hornerin OS=Homo sapiens GN=HRNR PE=1 SV=2	1	21.39	1092.07	2999.41	950.441	1680.64
CRCC2_HUMAN	Putative ciliary rootlet coiled-coil protein 2 OS=Homo sapiens GN=CROCC2 PE=5 SV=3	1	25.45	512.314	1964.64	2553.12	1676.69
MYPT1_HUMAN	Protein phosphatase 1 regulatory subunit 12A OS=Homo sapiens GN=PPP1R12A PE=1 SV=1	1	50.24	689.487	987.771	3283.43	1653.56
RL10A_HUMAN	60S ribosomal protein L10a OS=Homo sapiens GN=RPL10A PE=1 SV=2	1	47.47	0	1718.37	3203.37	1640.58
PAIRB_HUMAN	Plasminogen activator inhibitor 1 RNA-binding protein OS=Homo sapiens GN=SERBP1 PE=1 SV=2	1	64.07	445.042	1400.6	3070.93	1638.86
HNRH3_HUMAN	Heterogeneous nuclear ribonucleoprotein H3 OS=Homo sapiens GN=HNRNPH3 PE=1 SV=2	1	33.86	213.526	796.82	3900.54	1636.96
RS7_HUMAN	40S ribosomal protein S7 OS=Homo sapiens GN=RPS7 PE=1 SV=1	1	47.77	366.843	1163.82	3351.49	1627.39
LRC15_HUMAN	Leucine-rich repeat-containing protein 15 OS=Homo sapiens GN=LRRC15 PE=2 SV=2	2	75.6	1574.22	1531.81	1706.65	1604.23
EIF3F_HUMAN	Eukaryotic translation initiation factor 3 subunit F OS=Homo sapiens GN=EIF3F PE=1 SV=1	1	41.13	1341.39	1221.72	2121.44	1561.52
COBA1_HUMAN	Collagen alpha-1(XI) chain OS=Homo sapiens GN=COL11A1 PE=1 SV=4	1	60.66	1172.71	782.986	2699.1	1551.6
PSA4_HUMAN	Proteasome subunit alpha type-4 OS=Homo sapiens GN=PSMA4 PE=1 SV=1	1	21.08	0	1238.49	3413.74	1550.74
SYLM_HUMAN	Probable leucine--tRNA ligase, mitochondrial OS=Homo sapiens GN=LARS2 PE=1 SV=2	1	22.4	805.54	316.769	3487.11	1536.47
RAB2A_HUMAN	Ras-related protein Rab-2A OS=Homo sapiens GN=RAB2A PE=1 SV=1	1	24.13	52.868	1568.76	2981.31	1534.31
ANPRC_HUMAN	Atrial natriuretic peptide receptor 3 OS=Homo sapiens GN=NPR3 PE=1 SV=2	2	68.47	665.336	3298.45	638.786	1534.19
EF1A2_HUMAN	Elongation factor 1-alpha 2 OS=Homo sapiens GN=EEF1A2 PE=1 SV=1	1	201.43	3221.25	681.195	634.975	1512.47
SULF2_HUMAN	Extracellular sulfatase Sulf-2 OS=Homo sapiens GN=SULF2 PE=1 SV=1	1	22.91	537.623	1839.85	2086.46	1487.98
RS23_HUMAN	40S ribosomal protein S23 OS=Homo sapiens GN=RPS23 PE=1 SV=3	1	38.29	0	400.225	4060.82	1487.02
OFD1_HUMAN	Oral-facial-digital syndrome 1 protein OS=Homo sapiens GN=OFD1 PE=1 SV=1	1	24.86	0.193398	1732.27	2704.35	1478.94
EZRI_HUMAN	Ezrin OS=Homo sapiens GN=EZR PE=1 SV=4	1	219.77	668.127	1024.88	2662.55	1451.85
ST1B1_HUMAN	Sulfotransferase family cytosolic 1B member 1 OS=Homo sapiens GN=SULT1B1 PE=1 SV=2	1	25.29	4316.16	0	0	1438.72
AKA12_HUMAN	A-kinase anchor protein 12 OS=Homo sapiens GN=AKAP12 PE=1 SV=4	1	30.22	0	495.371	3815.13	1436.83
IPO5_HUMAN	Importin-5 OS=Homo sapiens GN=IPO5 PE=1 SV=4	1	27.05	716.577	1458.41	2127.81	1434.27
XRCC5_HUMAN	X-ray repair cross-complementing protein 5 OS=Homo sapiens GN=XRCC5 PE=1 SV=3	1	77.45	36.1725	1121.74	3115.52	1424.48
SON_HUMAN	Protein SON OS=Homo sapiens GN=SON PE=1 SV=4	1	22.23	572.106	929.924	2661.58	1387.87
CORO6_HUMAN	Coronin-6 OS=Homo sapiens GN=CORO6 PE=1 SV=2	1	28.16	0	4043.55	109.906	1384.48
GRAK_HUMAN	Granzyme K OS=Homo sapiens GN=GZMK PE=1 SV=1	1	23.03	3745.86	153.849	233.963	1377.89
ANXA4_HUMAN	Annexin A4 OS=Homo sapiens GN=ANXA4 PE=1 SV=4	1	69.59	117.217	336.976	3576.67	1343.62
NDKA_HUMAN	Nucleoside diphosphate kinase A OS=Homo sapiens GN=NME1 PE=1 SV=1	1	51.03	0	709.238	3280.6	1329.95
CO5_HUMAN	Complement C5 OS=Homo sapiens GN=C5 PE=1 SV=4	1	60.1	1931.83	2025.99	0	1319.27
GRN_HUMAN	Granulins OS=Homo sapiens GN=GRN PE=1 SV=2	1	24.94	1583.66	709.655	1563.37	1285.56
CCD40_HUMAN	Coiled-coil domain-containing protein 40 OS=Homo sapiens GN=CCDC40 PE=2 SV=2	1	23.77	1504.53	630.749	1701.07	1278.78
ENAM_HUMAN	Enamelin OS=Homo sapiens GN=ENAM PE=1 SV=3	1	27.68	2432.19	930.141	469.624	1277.32
HYOU1_HUMAN	Hypoxia up-regulated protein 1 OS=Homo sapiens GN=HYOU1 PE=1 SV=1	1	26.05	132.461	1291.7	2313.27	1245.81
FGF2_HUMAN	Fibroblast growth factor 2 OS=Homo sapiens GN=FGF2 PE=1 SV=3	1	23.82	1449.47	454.163	1806.51	1236.71
FREM3_HUMAN	FRAS1-related extracellular matrix protein 3 OS=Homo sapiens GN=FREM3 PE=3 SV=2	1	32.48	1064.07	1506.78	1119.21	1230.02
PCD18_HUMAN	Protocadherin-18 OS=Homo sapiens GN=PCDH18 PE=2 SV=3	1	24.1	1002.51	761.172	1687.3	1150.33
RBBP4_HUMAN	Histone-binding protein RBBP4 OS=Homo sapiens GN=RBBP4 PE=1 SV=3	1	38.2	0	338.92	3107.65	1148.86
KLH21_HUMAN	Kelch-like protein 21 OS=Homo sapiens GN=KLHL21 PE=1 SV=4	1	23.98	1590.02	1523.36	310.323	1141.24
SBDS_HUMAN	Ribosome maturation protein SBDS OS=Homo sapiens GN=SBDS PE=1 SV=4	1	50.95	155.897	862.446	2392.9	1137.08
ILK_HUMAN	Integrin-linked protein kinase OS=Homo sapiens GN=ILK PE=1 SV=2	1	31.3	165.617	1401.71	1790.86	1119.4
PPCE_HUMAN	Prolyl endopeptidase OS=Homo sapiens GN=PREP PE=1 SV=2	1	32.5	211.965	1006.32	2064.44	1094.24
MYO1C_HUMAN	Unconventional myosin-Ic OS=Homo sapiens GN=MYO1C PE=1 SV=4	1	24.72	373.814	1873.4	998.706	1081.97
ESPL1_HUMAN	Separin OS=Homo sapiens GN=ESPL1 PE=1 SV=3	1	23.44	973.524	1186.32	1064	1074.62
FAM3C_HUMAN	Protein FAM3C OS=Homo sapiens GN=FAM3C PE=1 SV=1	1	42.45	641.969	840	1700.1	1060.69
MORC3_HUMAN	MORC family CW-type zinc finger protein 3 OS=Homo sapiens GN=MORC3 PE=1 SV=3	1	23.83	1498.58	1026.51	641.317	1055.47
OBAS1_HUMAN	Putative uncharacterized protein OBSCN-AS1 OS=Homo sapiens GN=OBSCN-AS1 PE=5 SV=1	1	52.11	967.277	963.388	1230.09	1053.58
MICA3_HUMAN	[F-actin]-monooxygenase MICAL3 OS=Homo sapiens GN=MICAL3 PE=1 SV=2	1	20.13	1152.82	1582.4	396.403	1043.87
MX1_HUMAN;MX2_HUMAN	Interferon-induced GTP-binding protein Mx1 OS=Homo sapiens GN=MX1 PE=1 SV=4	3	103.39	757.533	607.741	1695.21	1020.16
PFD5_HUMAN	Prefoldin subunit 5 OS=Homo sapiens GN=PFDN5 PE=1 SV=2	1	25.7	2103.1	202.325	752.473	1019.3
TPC1_HUMAN	Two pore calcium channel protein 1 OS=Homo sapiens GN=TPCN1 PE=1 SV=3	1	22.46	3034.43	0	0	1011.48
PSD12_HUMAN	26S proteasome non-ATPase regulatory subunit 12 OS=Homo sapiens GN=PSMD12 PE=1 SV=3	1	62.12	153.076	314.981	2508.42	992.16
FADS1_HUMAN	Fatty acid desaturase 1 OS=Homo sapiens GN=FADS1 PE=1 SV=3	1	24.29	2396.72	571.106	0	989.276
CYBP_HUMAN	Calcyclin-binding protein OS=Homo sapiens GN=CACYBP PE=1 SV=2	1	21.04	230.703	573.429	2150.06	984.729
ERP29_HUMAN	Endoplasmic reticulum resident protein 29 OS=Homo sapiens GN=ERP29 PE=1 SV=4	1	41.55	0	632.974	2299.75	977.574
PSMD5_HUMAN	26S proteasome non-ATPase regulatory subunit 5 OS=Homo sapiens GN=PSMD5 PE=1 SV=3	1	30.2	0	348.805	2531.38	960.061
LRC4B_HUMAN	Leucine-rich repeat-containing protein 4B OS=Homo sapiens GN=LRRC4B PE=2 SV=3	1	22.71	217.442	1120.98	1452.81	930.413
CA094_HUMAN	Uncharacterized protein C1orf94 OS=Homo sapiens GN=C1orf94 PE=1 SV=2	1	33.36	2265.98	169.648	315.692	917.106
WDR75_HUMAN	WD repeat-containing protein 75 OS=Homo sapiens GN=WDR75 PE=1 SV=1	1	20.6	2144.64	0	578.413	907.684
PA1B2_HUMAN	Platelet-activating factor acetylhydrolase IB subunit beta OS=Homo sapiens GN=PAFAH1B2 PE=1 SV=1	1	40.62	0	551.815	2151.72	901.179
MXRA7_HUMAN	Matrix-remodeling-associated protein 7 OS=Homo sapiens GN=MXRA7 PE=1 SV=1	1	28.08	327.507	682.343	1672.19	894.014
SAE1_HUMAN	SUMO-activating enzyme subunit 1 OS=Homo sapiens GN=SAE1 PE=1 SV=1	1	52.87	0	220.243	2446.91	889.051
EIF3H_HUMAN	Eukaryotic translation initiation factor 3 subunit H OS=Homo sapiens GN=EIF3H PE=1 SV=1	1	45.84	115.492	749.886	1793.84	886.408
AL1L1_HUMAN	Cytosolic 10-formyltetrahydrofolate dehydrogenase OS=Homo sapiens GN=ALDH1L1 PE=1 SV=2	1	23.2	0	730.708	1918.35	883.021
H10_HUMAN	Histone H1.0 OS=Homo sapiens GN=H1F0 PE=1 SV=3	1	39.54	159.082	150.852	2313.7	874.545
QCR1_HUMAN	Cytochrome b-c1 complex subunit 1, mitochondrial OS=Homo sapiens GN=UQCRC1 PE=1 SV=3	1	24.1	585.876	790.914	1163.64	846.811
VATA_HUMAN	V-type proton ATPase catalytic subunit A OS=Homo sapiens GN=ATP6V1A PE=1 SV=2	1	25.89	49.7518	449.471	2003.89	834.372
VASP_HUMAN	Vasodilator-stimulated phosphoprotein OS=Homo sapiens GN=VASP PE=1 SV=3	1	40.25	309.836	895.894	1279.07	828.266
WFS1_HUMAN	Wolframin OS=Homo sapiens GN=WFS1 PE=1 SV=2	1	26.93	614.38	536.422	1312.31	821.037
PSB6_HUMAN	Proteasome subunit beta type-6 OS=Homo sapiens GN=PSMB6 PE=1 SV=4	1	38.76	1173.07	0	1257.68	810.249
B4GT4_HUMAN	Beta-1,4-galactosyltransferase 4 OS=Homo sapiens GN=B4GALT4 PE=1 SV=1	1	28.43	751.016	1150.82	491.561	797.799
SPSY_HUMAN	Spermine synthase OS=Homo sapiens GN=SMS PE=1 SV=2	1	34.37	159.55	1238.65	988.387	795.53
IF172_HUMAN	Intraflagellar transport protein 172 homolog OS=Homo sapiens GN=IFT172 PE=1 SV=2	1	24.65	1150.55	297.696	932.35	793.533
DYH5_HUMAN	Dynein heavy chain 5, axonemal OS=Homo sapiens GN=DNAH5 PE=1 SV=3	1	21.15	614.232	485.848	1214.09	771.389
GSTM3_HUMAN	Glutathione S-transferase Mu 3 OS=Homo sapiens GN=GSTM3 PE=1 SV=3	1	24.89	133.272	402.464	1771.16	768.964
IF6_HUMAN	Eukaryotic translation initiation factor 6 OS=Homo sapiens GN=EIF6 PE=1 SV=1	1	20.96	515.205	340.585	1348.41	734.735
RL24_HUMAN	60S ribosomal protein L24 OS=Homo sapiens GN=RPL24 PE=1 SV=1	1	30.33	0	730.953	1460.4	730.449
YD022_HUMAN	Putative uncharacterized protein FLJ45721 OS=Homo sapiens PE=5 SV=2	1	28.86	325.623	546.427	1299.71	723.921
SEM3C_HUMAN	Semaphorin-3C OS=Homo sapiens GN=SEMA3C PE=2 SV=2	1	33.29	503.496	243.205	1411.55	719.419
TARSH_HUMAN	Target of Nesh-SH3 OS=Homo sapiens GN=ABI3BP PE=1 SV=1	1	29.4	888.607	661.339	595.905	715.284
GFPT1_HUMAN	Glutamine--fructose-6-phosphate aminotransferase [isomerizing] 1 OS=Homo sapiens GN=GFPT1 PE=1 SV=3	1	30.34	0	570.885	1522.73	697.871
ANGT_HUMAN	Angiotensinogen OS=Homo sapiens GN=AGT PE=1 SV=1	1	41.07	0	281.087	1705.66	662.25
MACF1_HUMAN	Microtubule-actin cross-linking factor 1, isoforms 1/2/3/5 OS=Homo sapiens GN=MACF1 PE=1 SV=4	1	21.96	618.459	771.382	483.328	624.39
SNIP1_HUMAN	Smad nuclear-interacting protein 1 OS=Homo sapiens GN=SNIP1 PE=1 SV=1	1	23.24	175.836	1019.43	675.478	623.581
IF4B_HUMAN	Eukaryotic translation initiation factor 4B OS=Homo sapiens GN=EIF4B PE=1 SV=2	2	80.42	37.8305	798.139	994.459	610.143
GBRE_HUMAN	Gamma-aminobutyric acid receptor subunit epsilon OS=Homo sapiens GN=GABRE PE=2 SV=2	1	20.41	1600.66	0	227.986	609.547
E41L2_HUMAN	Band 4.1-like protein 2 OS=Homo sapiens GN=EPB41L2 PE=1 SV=1	1	26.69	306.502	547.206	972.665	608.791
ADGB_HUMAN	Androglobin OS=Homo sapiens GN=ADGB PE=2 SV=3	1	24.22	239.528	552.918	908.317	566.921
CE85L_HUMAN	Centrosomal protein of 85 kDa-like OS=Homo sapiens GN=CEP85L PE=1 SV=1	1	48.15	921.46	216.348	512.054	549.954
NASP_HUMAN	Nuclear autoantigenic sperm protein OS=Homo sapiens GN=NASP PE=1 SV=2	1	25.92	314.502	480.355	846.039	546.965
IF4G2_HUMAN	Eukaryotic translation initiation factor 4 gamma 2 OS=Homo sapiens GN=EIF4G2 PE=1 SV=1	1	31.88	227.899	346.658	856.516	477.024
CCD51_HUMAN	Coiled-coil domain-containing protein 51 OS=Homo sapiens GN=CCDC51 PE=1 SV=2	1	21.66	433.786	571.947	424.371	476.702
SCNND_HUMAN	Amiloride-sensitive sodium channel subunit delta OS=Homo sapiens GN=SCNN1D PE=1 SV=2	1	22.43	899.689	204.61	242.061	448.786
FIBIN_HUMAN	Fin bud initiation factor homolog OS=Homo sapiens GN=FIBIN PE=1 SV=1	1	29.08	1147.17	74.4698	118.294	446.645
UBFL1_HUMAN	Upstream-binding factor 1-like protein 1 OS=Homo sapiens GN=UBTFL1 PE=3 SV=1	1	22.4	0	178.297	1071.64	416.647
OR4L1_HUMAN	Olfactory receptor 4L1 OS=Homo sapiens GN=OR4L1 PE=3 SV=1	1	29.87	370.056	537.901	331.273	413.077
ODO2_HUMAN	Dihydrolipoyllysine-residue succinyltransferase component of 2-oxoglutarate dehydrogenase complex, mitochondrial OS=Homo sapiens GN=DLST PE=1 SV=4	1	30.62	0	0	1189.89	396.629
CLU_HUMAN	Clustered mitochondria protein homolog OS=Homo sapiens GN=CLUH PE=1 SV=2	1	21.99	596.623	349.555	140.428	362.202
LMNB2_HUMAN	Lamin-B2 OS=Homo sapiens GN=LMNB2 PE=1 SV=4	1	106.18	122.743	189.521	771.118	361.127
T3HPD_HUMAN	Trans-3-hydroxy-L-proline dehydratase OS=Homo sapiens GN=L3HYPDH PE=1 SV=2	1	26.83	48.1464	264.28	655.863	322.763
CRIPT_HUMAN	Cysteine-rich PDZ-binding protein OS=Homo sapiens GN=CRIPT PE=1 SV=1	1	26.12	461.936	368.278	111.435	313.883
ADCK1_HUMAN	Uncharacterized aarF domain-containing protein kinase 1 OS=Homo sapiens GN=ADCK1 PE=2 SV=2	1	23.2	0	136.69	754.757	297.149
PLCD4_HUMAN	1-phosphatidylinositol 4,5-bisphosphate phosphodiesterase delta-4 OS=Homo sapiens GN=PLCD4 PE=2 SV=1	1	24.36	832.417	0	19.6972	284.038
PTHR_HUMAN	Parathyroid hormone-related protein OS=Homo sapiens GN=PTHLH PE=1 SV=1	1	36.87	98.9556	79.2146	600.505	259.559
IMA1_HUMAN	Importin subunit alpha-1 OS=Homo sapiens GN=KPNA2 PE=1 SV=1	1	53.04	0	616.494	161.015	259.17
SDHA_HUMAN	Succinate dehydrogenase [ubiquinone] flavoprotein subunit, mitochondrial OS=Homo sapiens GN=SDHA PE=1 SV=2	1	47.46	47.6758	88.1829	556.016	230.625
EXOC7_HUMAN	Exocyst complex component 7 OS=Homo sapiens GN=EXOC7 PE=1 SV=3	1	23.21	0	212.897	426.225	213.041
BTAF1_HUMAN	TATA-binding protein-associated factor 172 OS=Homo sapiens GN=BTAF1 PE=1 SV=2	1	34.1	558.885	0	0	186.295
DYH1_HUMAN	Dynein heavy chain 1, axonemal OS=Homo sapiens GN=DNAH1 PE=1 SV=4	1	35.84	0	89.6009	457.371	182.324
CLCF1_HUMAN	Cardiotrophin-like cytokine factor 1 OS=Homo sapiens GN=CLCF1 PE=1 SV=1	1	21.61	519.461	0	15.197	178.219
ADCL2_HUMAN	Arylacetamide deacetylase-like 2 OS=Homo sapiens GN=AADACL2 PE=2 SV=3	1	21.65	303.675	71.0681	137.997	170.913
NCBP2_HUMAN	Nuclear cap-binding protein subunit 2 OS=Homo sapiens GN=NCBP2 PE=1 SV=1	1	25.74	430.197	54.7613	0	161.653
ESM1_HUMAN	Endothelial cell-specific molecule 1 OS=Homo sapiens GN=ESM1 PE=1 SV=2	2	70.79	315.621	157.343	0	157.655
ACPH_HUMAN	Acylamino-acid-releasing enzyme OS=Homo sapiens GN=APEH PE=1 SV=4	1	42.38	0	3.78168	466.695	156.825
HMGA1_HUMAN	High mobility group protein HMG-I/HMG-Y OS=Homo sapiens GN=HMGA1 PE=1 SV=3	1	30.16	231.027	191.694	0	140.907
TICN1_HUMAN	Testican-1 OS=Homo sapiens GN=SPOCK1 PE=1 SV=1	1	43.33	136.064	0	279.442	138.502
SAS6_HUMAN	Spindle assembly abnormal protein 6 homolog OS=Homo sapiens GN=SASS6 PE=1 SV=1	1	43.4	167.589	16.5071	217.768	133.955
TR19L_HUMAN	Tumor necrosis factor receptor superfamily member 19L OS=Homo sapiens GN=RELT PE=1 SV=1	1	22.7	265.717	76.1044	53.8591	131.893
TTI2_HUMAN	TELO2-interacting protein 2 OS=Homo sapiens GN=TTI2 PE=1 SV=1	1	21.67	0	193.251	182.781	125.344
DHB4_HUMAN	Peroxisomal multifunctional enzyme type 2 OS=Homo sapiens GN=HSD17B4 PE=1 SV=3	1	34.27	0	0	374.019	124.673
SIR6_HUMAN	NAD-dependent protein deacetylase sirtuin-6 OS=Homo sapiens GN=SIRT6 PE=1 SV=2	1	34.49	114.205	90.1582	165.102	123.155
LSM10_HUMAN	U7 snRNA-associated Sm-like protein LSm10 OS=Homo sapiens GN=LSM10 PE=1 SV=1	1	22.56	285.483	33.5477	49.0002	122.677
TBA8_HUMAN	Tubulin alpha-8 chain OS=Homo sapiens GN=TUBA8 PE=1 SV=1	1	324.43	218.533	0.285059	139.046	119.288
MTG2_HUMAN	Mitochondrial ribosome-associated GTPase 2 OS=Homo sapiens GN=MTG2 PE=1 SV=1	1	22.55	0	0	201.039	67.0131
LNX1_HUMAN	E3 ubiquitin-protein ligase LNX OS=Homo sapiens GN=LNX1 PE=1 SV=1	1	20.71	0	0	199.125	66.3749
CH3L1_HUMAN	Chitinase-3-like protein 1 OS=Homo sapiens GN=CHI3L1 PE=1 SV=2	1	22.85	0	0	190.776	63.5919
PK1L3_HUMAN	Polycystic kidney disease protein 1-like 3 OS=Homo sapiens GN=PKD1L3 PE=1 SV=1	1	22.22	42.709	0.888553	144.712	62.7699
STON2_HUMAN	Stonin-2 OS=Homo sapiens GN=STON2 PE=1 SV=1	1	59.43	146.318	0	0	48.7727
CAN1_HUMAN	Calpain-1 catalytic subunit OS=Homo sapiens GN=CAPN1 PE=1 SV=1	1	27.33	0	0	141.157	47.0524
CO7A1_HUMAN	Collagen alpha-1(VII) chain OS=Homo sapiens GN=COL7A1 PE=1 SV=2	1	32.57	1.55353	0	108.583	36.7122
NEXN_HUMAN	Nexilin OS=Homo sapiens GN=NEXN PE=1 SV=1	1	20.37	67.4568	17.2015	16.1543	33.6042
COQ5_HUMAN	2-methoxy-6-polyprenyl-1,4-benzoquinol methylase, mitochondrial OS=Homo sapiens GN=COQ5 PE=1 SV=2	1	23.77	0	4.86136	5.43365	3.43167

## Sheet: ERS-PAT3
				ERS-FAM3
Accession	Description	Peptides used for quantitation	Confidence score	Surn_ERS_FAM3_1_01	Surn_ERS_FAM3_2_01	Surn_ERS_FAM3_3_01	Average Abundance
CO1A2_HUMAN	Collagen alpha-2(I) chain OS=Homo sapiens GN=COL1A2 PE=1 SV=7	78	4061.73	5.5713e+07	4.51239e+07	4.46029e+07	4.84799e+07
FINC_HUMAN	Fibronectin OS=Homo sapiens GN=FN1 PE=1 SV=4	59	3015.54	2.67814e+07	3.06756e+07	2.37965e+07	2.70845e+07
MMP2_HUMAN;MMP11_HUMAN	72 kDa type IV collagenase OS=Homo sapiens GN=MMP2 PE=1 SV=2	36	1715.92	1.76449e+07	1.70635e+07	1.96991e+07	1.81358e+07
TIMP1_HUMAN	Metalloproteinase inhibitor 1 OS=Homo sapiens GN=TIMP1 PE=1 SV=1	9	446.08	1.83396e+07	9.42724e+06	2.63867e+07	1.80512e+07
PGS2_HUMAN	Decorin OS=Homo sapiens GN=DCN PE=1 SV=1	21	1002.48	9.10926e+06	1.48235e+07	9.68021e+06	1.12043e+07
MMP1_HUMAN	Interstitial collagenase OS=Homo sapiens GN=MMP1 PE=1 SV=3	29	1487.43	1.47913e+07	8.60302e+06	9.10834e+06	1.08342e+07
BGH3_HUMAN	Transforming growth factor-beta-induced protein ig-h3 OS=Homo sapiens GN=TGFBI PE=1 SV=1	25	1167.75	6.88996e+06	1.29294e+07	7.58484e+06	9.13474e+06
PCOC1_HUMAN	Procollagen C-endopeptidase enhancer 1 OS=Homo sapiens GN=PCOLCE PE=1 SV=2	19	962.47	7.60363e+06	7.42167e+06	1.12353e+07	8.75355e+06
C1R_HUMAN;C1RL_HUMAN	Complement C1r subcomponent OS=Homo sapiens GN=C1R PE=1 SV=2	29	1511.67	8.61872e+06	5.50821e+06	8.38188e+06	7.50294e+06
CO1A1_HUMAN	Collagen alpha-1(I) chain OS=Homo sapiens GN=COL1A1 PE=1 SV=5	43	1992.32	7.68393e+06	6.8292e+06	7.40277e+06	7.3053e+06
TSP1_HUMAN;RHG35_HUMAN	Thrombospondin-1 OS=Homo sapiens GN=THBS1 PE=1 SV=2	40	2186.63	5.4092e+06	9.90335e+06	5.56888e+06	6.96048e+06
CO6A1_HUMAN	Collagen alpha-1(VI) chain OS=Homo sapiens GN=COL6A1 PE=1 SV=3	28	1347.67	7.55684e+06	6.10566e+06	6.94078e+06	6.86776e+06
QSOX1_HUMAN	Sulfhydryl oxidase 1 OS=Homo sapiens GN=QSOX1 PE=1 SV=3	28	1410.62	5.69621e+06	8.21414e+06	6.49342e+06	6.80126e+06
COCA1_HUMAN	Collagen alpha-1(XII) chain OS=Homo sapiens GN=COL12A1 PE=1 SV=2	70	3196.23	4.96673e+06	9.35171e+06	4.90672e+06	6.40839e+06
C1S_HUMAN	Complement C1s subcomponent OS=Homo sapiens GN=C1S PE=1 SV=1	29	1436.16	6.59582e+06	7.21085e+06	4.90984e+06	6.23884e+06
FBLN1_HUMAN	Fibulin-1 OS=Homo sapiens GN=FBLN1 PE=1 SV=4	21	1126.34	4.97643e+06	6.53148e+06	5.12699e+06	5.54497e+06
SPRC_HUMAN	SPARC OS=Homo sapiens GN=SPARC PE=1 SV=1	13	543.92	5.1087e+06	5.04628e+06	5.62763e+06	5.26087e+06
ALBU_HUMAN	Serum albumin OS=Homo sapiens GN=ALB PE=1 SV=2	6	288.15	1.09199e+06	1.02715e+07	2.42342e+06	4.59562e+06
CO6A3_HUMAN	Collagen alpha-3(VI) chain OS=Homo sapiens GN=COL6A3 PE=1 SV=5	59	2724.17	4.38528e+06	2.82382e+06	3.19242e+06	3.46717e+06
TSP2_HUMAN	Thrombospondin-2 OS=Homo sapiens GN=THBS2 PE=1 SV=2	27	1601.45	2.11471e+06	5.40157e+06	2.06023e+06	3.19217e+06
PEDF_HUMAN	Pigment epithelium-derived factor OS=Homo sapiens GN=SERPINF1 PE=1 SV=4	14	737.18	2.32046e+06	2.27547e+06	3.71149e+06	2.76914e+06
GRP78_HUMAN	78 kDa glucose-regulated protein OS=Homo sapiens GN=HSPA5 PE=1 SV=2	21	1136.91	2.86352e+06	2.0034e+06	2.88701e+06	2.58464e+06
GDN_HUMAN	Glia-derived nexin OS=Homo sapiens GN=SERPINE2 PE=1 SV=1	19	959.15	1.87642e+06	2.01428e+06	3.85948e+06	2.58339e+06
FLNA_HUMAN;FLNB_HUMAN	Filamin-A OS=Homo sapiens GN=FLNA PE=1 SV=4	44	1872	2.79195e+06	2.70457e+06	2.05446e+06	2.51699e+06
VIME_HUMAN;AINX_HUMAN;DESM_HUMAN;GFAP_HUMAN;PERI_HUMAN	Vimentin OS=Homo sapiens GN=VIM PE=1 SV=4	41	2000.4	2.92181e+06	2.73504e+06	1.83519e+06	2.49735e+06
CO3_HUMAN	Complement C3 OS=Homo sapiens GN=C3 PE=1 SV=2	55	2612.93	2.55602e+06	2.18782e+06	2.58916e+06	2.44434e+06
IBP7_HUMAN	Insulin-like growth factor-binding protein 7 OS=Homo sapiens GN=IGFBP7 PE=1 SV=1	16	796.77	1.72972e+06	2.49056e+06	2.67267e+06	2.29765e+06
TRFL_HUMAN	Lactotransferrin OS=Homo sapiens GN=LTF PE=1 SV=6	4	150.05	467695	4.59296e+06	1.75411e+06	2.27159e+06
G3P_HUMAN;G3PT_HUMAN	Glyceraldehyde-3-phosphate dehydrogenase OS=Homo sapiens GN=GAPDH PE=1 SV=3	11	553.01	2.32455e+06	2.01049e+06	2.40962e+06	2.24822e+06
CO6A2_HUMAN	Collagen alpha-2(VI) chain OS=Homo sapiens GN=COL6A2 PE=1 SV=4	23	1091.94	2.04487e+06	2.36087e+06	2.1839e+06	2.19655e+06
KPYM_HUMAN;KPYR_HUMAN	Pyruvate kinase PKM OS=Homo sapiens GN=PKM PE=1 SV=4	18	898.65	2.46721e+06	1.8224e+06	2.13021e+06	2.13994e+06
PTX3_HUMAN;AN30A_HUMAN	Pentraxin-related protein PTX3 OS=Homo sapiens GN=PTX3 PE=1 SV=3	15	901.14	1.39308e+06	1.38849e+06	3.45234e+06	2.07797e+06
ACTB_HUMAN;ACTBL_HUMAN;ACTBM_HUMAN;POTEE_HUMAN;POTEF_HUMAN;POTEI_HUMAN	Actin, cytoplasmic 1 OS=Homo sapiens GN=ACTB PE=1 SV=1	6	848.99	2.14256e+06	1.9148e+06	1.9209e+06	1.99276e+06
ENPL_HUMAN;ENPLL_HUMAN	Endoplasmin OS=Homo sapiens GN=HSP90B1 PE=1 SV=1	23	1121.52	2.14021e+06	860267	2.0852e+06	1.69523e+06
FETUA_HUMAN	Alpha-2-HS-glycoprotein OS=Homo sapiens GN=AHSG PE=1 SV=1	3	215.83	679773	2.69244e+06	1.68746e+06	1.68656e+06
CO3A1_HUMAN	Collagen alpha-1(III) chain OS=Homo sapiens GN=COL3A1 PE=1 SV=4	19	855.62	1.82212e+06	1.88659e+06	1.26339e+06	1.65737e+06
LMNA_HUMAN;LMNB1_HUMAN	Prelamin-A/C OS=Homo sapiens GN=LMNA PE=1 SV=1	37	1803.18	2.22131e+06	1.27357e+06	1.48066e+06	1.65851e+06
CATB_HUMAN	Cathepsin B OS=Homo sapiens GN=CTSB PE=1 SV=3	14	635.3	1.23481e+06	1.70867e+06	1.8696e+06	1.60436e+06
CFAB_HUMAN	Complement factor B OS=Homo sapiens GN=CFB PE=1 SV=2	24	1086	1.5948e+06	1.09005e+06	1.14928e+06	1.27804e+06
ENOA_HUMAN;ENOB_HUMAN	Alpha-enolase OS=Homo sapiens GN=ENO1 PE=1 SV=2	12	628.78	1.1004e+06	833666	1.49894e+06	1.14434e+06
TIMP2_HUMAN	Metalloproteinase inhibitor 2 OS=Homo sapiens GN=TIMP2 PE=1 SV=2	8	361.17	783047	1.18515e+06	1.0927e+06	1.0203e+06
ITIH2_HUMAN	Inter-alpha-trypsin inhibitor heavy chain H2 OS=Homo sapiens GN=ITIH2 PE=1 SV=2	5	201.54	303591	1.82095e+06	751781	958775
MASP1_HUMAN	Mannan-binding lectin serine protease 1 OS=Homo sapiens GN=MASP1 PE=1 SV=3	7	380.95	641501	1.76309e+06	460985	955191
LAMB2_HUMAN	Laminin subunit beta-2 OS=Homo sapiens GN=LAMB2 PE=1 SV=2	27	1297.31	1.05202e+06	804390	986788	947733
LEG1_HUMAN	Galectin-1 OS=Homo sapiens GN=LGALS1 PE=1 SV=2	8	341.81	1.09705e+06	999506	720282	938946
CLUS_HUMAN	Clusterin OS=Homo sapiens GN=CLU PE=1 SV=1	12	578.27	818956	985319	825942	876739
ALDOA_HUMAN	Fructose-bisphosphate aldolase A OS=Homo sapiens GN=ALDOA PE=1 SV=2	11	574.38	1.03287e+06	737640	771579	847364
ANXA5_HUMAN	Annexin A5 OS=Homo sapiens GN=ANXA5 PE=1 SV=2	13	522.91	750919	819403	895122	821815
HSP7C_HUMAN;HSP72_HUMAN	Heat shock cognate 71 kDa protein OS=Homo sapiens GN=HSPA8 PE=1 SV=1	15	1090.52	906320	893868	649423	816537
GELS_HUMAN	Gelsolin OS=Homo sapiens GN=GSN PE=1 SV=1	17	742.45	839372	819133	698608	785704
POF1B_HUMAN	Protein POF1B OS=Homo sapiens GN=POF1B PE=1 SV=3	1	22.84	226026	1.35056e+06	748627	775070
HSP74_HUMAN	Heat shock 70 kDa protein 4 OS=Homo sapiens GN=HSPA4 PE=1 SV=4	2	67.84	98027.1	1.34329e+06	859925	767082
SRPX_HUMAN	Sushi repeat-containing protein SRPX OS=Homo sapiens GN=SRPX PE=1 SV=1	9	367.24	590544	977919	527693	698718
LG3BP_HUMAN	Galectin-3-binding protein OS=Homo sapiens GN=LGALS3BP PE=1 SV=1	13	681.34	814029	607673	651125	690942
PGBM_HUMAN	Basement membrane-specific heparan sulfate proteoglycan core protein OS=Homo sapiens GN=HSPG2 PE=1 SV=4	22	988.07	690713	817233	513247	673731
POSTN_HUMAN	Periostin OS=Homo sapiens GN=POSTN PE=1 SV=2	15	707.5	799084	330121	840478	656561
MMP3_HUMAN	Stromelysin-1 OS=Homo sapiens GN=MMP3 PE=1 SV=2	18	971.32	712765	787130	460269	653388
LDHA_HUMAN;LDH6A_HUMAN	L-lactate dehydrogenase A chain OS=Homo sapiens GN=LDHA PE=1 SV=2	10	657.56	776831	372556	753310	634232
BAG2_HUMAN	BAG family molecular chaperone regulator 2 OS=Homo sapiens GN=BAG2 PE=1 SV=1	3	114.92	188408	1.35428e+06	296119	612937
TENA_HUMAN	Tenascin OS=Homo sapiens GN=TNC PE=1 SV=3	21	1039.02	405164	869819	545953	606979
TKT_HUMAN	Transketolase OS=Homo sapiens GN=TKT PE=1 SV=3	11	465.54	868518	423915	452523	581652
HTRA1_HUMAN	Serine protease HTRA1 OS=Homo sapiens GN=HTRA1 PE=1 SV=1	11	437.8	412556	391228	791170	531651
LAMC1_HUMAN	Laminin subunit gamma-1 OS=Homo sapiens GN=LAMC1 PE=1 SV=3	15	702.19	537321	485044	569491	530619
ANXA2_HUMAN;AXA2L_HUMAN	Annexin A2 OS=Homo sapiens GN=ANXA2 PE=1 SV=2	13	755.74	507759	411617	667652	529009
OVOS1_HUMAN	Ovostatin homolog 1 OS=Homo sapiens GN=OVOS1 PE=2 SV=2	1	22.79	98590.6	945598	532531	525573
IBP2_HUMAN	Insulin-like growth factor-binding protein 2 OS=Homo sapiens GN=IGFBP2 PE=1 SV=2	7	322.57	515846	569818	429294	504986
PPIB_HUMAN	Peptidyl-prolyl cis-trans isomerase B OS=Homo sapiens GN=PPIB PE=1 SV=2	6	285.99	498830	412785	578852	496822
PAI1_HUMAN	Plasminogen activator inhibitor 1 OS=Homo sapiens GN=SERPINE1 PE=1 SV=1	6	330.22	395715	471678	560173	475855
ANGL2_HUMAN;ANGL1_HUMAN;ANGL6_HUMAN	Angiopoietin-related protein 2 OS=Homo sapiens GN=ANGPTL2 PE=1 SV=1	11	521.1	378403	745115	298526	474015
NID2_HUMAN;LRP8_HUMAN	Nidogen-2 OS=Homo sapiens GN=NID2 PE=1 SV=3	17	747.36	333757	738051	315481	462430
PLOD1_HUMAN;ARHGI_HUMAN	Procollagen-lysine,2-oxoglutarate 5-dioxygenase 1 OS=Homo sapiens GN=PLOD1 PE=1 SV=2	7	299.98	407177	511079	401066	439774
HS90B_HUMAN;H90B2_HUMAN;H90B3_HUMAN;H90B4_HUMAN;HS904_HUMAN	Heat shock protein HSP 90-beta OS=Homo sapiens GN=HSP90AB1 PE=1 SV=4	12	884.06	611961	327624	367287	435624
TPIS_HUMAN	Triosephosphate isomerase OS=Homo sapiens GN=TPI1 PE=1 SV=3	9	413.4	629255	285788	385168	433404
CATZ_HUMAN	Cathepsin Z OS=Homo sapiens GN=CTSZ PE=1 SV=1	7	302.45	260397	571102	399860	410453
TBB5_HUMAN;TBB1_HUMAN;TBB2B_HUMAN;TBB8L_HUMAN	Tubulin beta chain OS=Homo sapiens GN=TUBB PE=1 SV=2	3	693.63	467318	335183	404696	402399
PDIA3_HUMAN	Protein disulfide-isomerase A3 OS=Homo sapiens GN=PDIA3 PE=1 SV=4	13	543.28	412357	311985	457793	394045
PROF1_HUMAN	Profilin-1 OS=Homo sapiens GN=PFN1 PE=1 SV=2	5	217.36	396571	315251	463848	391890
EDIL3_HUMAN	EGF-like repeat and discoidin I-like domain-containing protein 3 OS=Homo sapiens GN=EDIL3 PE=1 SV=1	7	252.74	204389	615729	347014	389044
CTHR1_HUMAN	Collagen triple helix repeat-containing protein 1 OS=Homo sapiens GN=CTHRC1 PE=1 SV=1	6	246.26	365396	547860	250776	388011
CALU_HUMAN	Calumenin OS=Homo sapiens GN=CALU PE=1 SV=2	10	409.12	205471	743842	212198	387170
CALR_HUMAN	Calreticulin OS=Homo sapiens GN=CALR PE=1 SV=1	8	392.52	254665	273082	630602	386117
SERPH_HUMAN	Serpin H1 OS=Homo sapiens GN=SERPINH1 PE=1 SV=2	13	611.7	349570	339932	459883	383128
INP4B_HUMAN	Type II inositol 3,4-bisphosphate 4-phosphatase OS=Homo sapiens GN=INPP4B PE=2 SV=4	1	20.95	65681.4	846293	229318	380431
TERA_HUMAN;KATL2_HUMAN	Transitional endoplasmic reticulum ATPase OS=Homo sapiens GN=VCP PE=1 SV=4	13	577.69	708620	212947	210909	377492
PLTP_HUMAN	Phospholipid transfer protein OS=Homo sapiens GN=PLTP PE=1 SV=1	6	262.73	368157	220576	536913	375216
MFGM_HUMAN	Lactadherin OS=Homo sapiens GN=MFGE8 PE=1 SV=2	14	834.19	223092	417183	479814	373363
LDHB_HUMAN	L-lactate dehydrogenase B chain OS=Homo sapiens GN=LDHB PE=1 SV=2	6	359.55	437503	220322	398028	351951
PXDN_HUMAN	Peroxidasin homolog OS=Homo sapiens GN=PXDN PE=1 SV=2	15	631.15	288189	421115	286052	331786
HEXB_HUMAN	Beta-hexosaminidase subunit beta OS=Homo sapiens GN=HEXB PE=1 SV=3	9	321.58	253759	268918	450133	324270
SODC_HUMAN	Superoxide dismutase [Cu-Zn] OS=Homo sapiens GN=SOD1 PE=1 SV=2	6	252.21	279024	325590	359372	321329
GRP75_HUMAN	Stress-70 protein, mitochondrial OS=Homo sapiens GN=HSPA9 PE=1 SV=2	12	605.22	396923	178182	387217	320774
MLH1_HUMAN	DNA mismatch repair protein Mlh1 OS=Homo sapiens GN=MLH1 PE=1 SV=1	2	51.11	158381	86345.2	685272	309999
HEXA_HUMAN	Beta-hexosaminidase subunit alpha OS=Homo sapiens GN=HEXA PE=1 SV=2	9	376.37	250289	195779	463778	303282
ZN362_HUMAN	Zinc finger protein 362 OS=Homo sapiens GN=ZNF362 PE=1 SV=1	1	31.62	3231.08	170593	723165	298996
RS27A_HUMAN	Ubiquitin-40S ribosomal protein S27a OS=Homo sapiens GN=RPS27A PE=1 SV=2	3	75.5	317039	260023	317571	298211
EF2_HUMAN	Elongation factor 2 OS=Homo sapiens GN=EEF2 PE=1 SV=4	15	579.13	395759	209345	256668	287257
FBLN4_HUMAN	EGF-containing fibulin-like extracellular matrix protein 2 OS=Homo sapiens GN=EFEMP2 PE=1 SV=3	4	167.06	287960	260133	312610	286901
FSTL1_HUMAN	Follistatin-related protein 1 OS=Homo sapiens GN=FSTL1 PE=1 SV=1	10	453.72	156505	357970	323602	279359
GNS_HUMAN	N-acetylglucosamine-6-sulfatase OS=Homo sapiens GN=GNS PE=1 SV=3	5	192.92	268644	303777	260642	277688
CATL1_HUMAN	Cathepsin L1 OS=Homo sapiens GN=CTSL PE=1 SV=2	2	89.63	224394	370320	222929	272548
CO5A1_HUMAN	Collagen alpha-1(V) chain OS=Homo sapiens GN=COL5A1 PE=1 SV=3	6	190.89	289535	291949	231022	270835
SYNE2_HUMAN	Nesprin-2 OS=Homo sapiens GN=SYNE2 PE=1 SV=3	1	26.85	243593	33823.5	522136	266518
CBPE_HUMAN	Carboxypeptidase E OS=Homo sapiens GN=CPE PE=1 SV=1	9	328.11	277579	224938	290862	264460
GPC1_HUMAN	Glypican-1 OS=Homo sapiens GN=GPC1 PE=1 SV=2	7	254.58	182601	316551	283125	260759
CO9_HUMAN	Complement component C9 OS=Homo sapiens GN=C9 PE=1 SV=2	2	109.51	207526	57057.7	514726	259770
GDIR1_HUMAN	Rho GDP-dissociation inhibitor 1 OS=Homo sapiens GN=ARHGDIA PE=1 SV=3	2	93.05	320046	205295	222541	249294
LOXL2_HUMAN	Lysyl oxidase homolog 2 OS=Homo sapiens GN=LOXL2 PE=1 SV=1	10	390.12	173530	250004	295223	239586
PDIA1_HUMAN	Protein disulfide-isomerase OS=Homo sapiens GN=P4HB PE=1 SV=3	10	526.11	232159	219740	264711	238870
PLOD3_HUMAN	Procollagen-lysine,2-oxoglutarate 5-dioxygenase 3 OS=Homo sapiens GN=PLOD3 PE=1 SV=1	9	431.76	218942	320348	174112	237801
RF1M_HUMAN	Peptide chain release factor 1, mitochondrial OS=Homo sapiens GN=MTRF1 PE=1 SV=2	1	20.85	261402	211888	219454	230915
PRDX1_HUMAN	Peroxiredoxin-1 OS=Homo sapiens GN=PRDX1 PE=1 SV=1	4	263.23	240833	218458	226568	228620
FBLN5_HUMAN	Fibulin-5 OS=Homo sapiens GN=FBLN5 PE=1 SV=1	5	224.02	208347	229566	242078	226664
FKB10_HUMAN;CABP7_HUMAN	Peptidyl-prolyl cis-trans isomerase FKBP10 OS=Homo sapiens GN=FKBP10 PE=1 SV=1	9	335.34	187080	354871	133823	225258
PGK1_HUMAN;PGK2_HUMAN	Phosphoglycerate kinase 1 OS=Homo sapiens GN=PGK1 PE=1 SV=3	8	357.75	201445	158605	300688	220246
HS90A_HUMAN;HS902_HUMAN;HS905_HUMAN;XPP3_HUMAN	Heat shock protein HSP 90-alpha OS=Homo sapiens GN=HSP90AA1 PE=1 SV=5	6	623.67	272371	198441	188265	219692
OLFL3_HUMAN	Olfactomedin-like protein 3 OS=Homo sapiens GN=OLFML3 PE=2 SV=1	11	506.87	233638	226398	193168	217735
HMGC2_HUMAN	3-hydroxymethyl-3-methylglutaryl-CoA lyase, cytoplasmic OS=Homo sapiens GN=HMGCLL1 PE=1 SV=3	1	28.09	73209	154499	422337	216682
AEBP1_HUMAN	Adipocyte enhancer-binding protein 1 OS=Homo sapiens GN=AEBP1 PE=1 SV=1	10	446.23	189747	254986	196316	213683
LAMA4_HUMAN	Laminin subunit alpha-4 OS=Homo sapiens GN=LAMA4 PE=1 SV=4	12	426.35	199113	173235	266256	212868
5NTD_HUMAN	5'-nucleotidase OS=Homo sapiens GN=NT5E PE=1 SV=1	7	309.53	214633	228781	193293	212236
CD166_HUMAN	CD166 antigen OS=Homo sapiens GN=ALCAM PE=1 SV=2	5	203.11	473734	81990.5	77436	211053
CSPG2_HUMAN	Versican core protein OS=Homo sapiens GN=VCAN PE=1 SV=3	8	319.28	236956	238718	157163	210946
VASN_HUMAN	Vasorin OS=Homo sapiens GN=VASN PE=1 SV=1	7	392.02	217115	248382	165723	210407
FBLN2_HUMAN	Fibulin-2 OS=Homo sapiens GN=FBLN2 PE=1 SV=2	10	496.07	180576	188249	244584	204470
CPXM2_HUMAN	Inactive carboxypeptidase-like protein X2 OS=Homo sapiens GN=CPXM2 PE=2 SV=3	7	330.16	270334	134792	203506	202877
FBN1_HUMAN	Fibrillin-1 OS=Homo sapiens GN=FBN1 PE=1 SV=3	7	286.72	138313	176891	285905	200370
PDIA4_HUMAN	Protein disulfide-isomerase A4 OS=Homo sapiens GN=PDIA4 PE=1 SV=2	10	431.44	262394	110313	226235	199647
LUM_HUMAN	Lumican OS=Homo sapiens GN=LUM PE=1 SV=2	7	378.84	176930	238209	170501	195213
FAM9B_HUMAN	Protein FAM9B OS=Homo sapiens GN=FAM9B PE=1 SV=1	1	27.47	155366	419014	6217.58	193533
TB182_HUMAN	182 kDa tankyrase-1-binding protein OS=Homo sapiens GN=TNKS1BP1 PE=1 SV=4	2	53.78	208318	289487	76999.7	191602
MDHM_HUMAN	Malate dehydrogenase, mitochondrial OS=Homo sapiens GN=MDH2 PE=1 SV=3	8	317.65	208506	61762.8	303896	191388
GPNMB_HUMAN	Transmembrane glycoprotein NMB OS=Homo sapiens GN=GPNMB PE=1 SV=2	2	100.07	182691	149726	232050	188155
GAS6_HUMAN	Growth arrest-specific protein 6 OS=Homo sapiens GN=GAS6 PE=1 SV=2	8	404.75	139661	272913	142233	184936
NUCL_HUMAN	Nucleolin OS=Homo sapiens GN=NCL PE=1 SV=3	12	490.07	224423	148482	181176	184694
LAMB1_HUMAN	Laminin subunit beta-1 OS=Homo sapiens GN=LAMB1 PE=1 SV=2	10	341.45	175037	163195	204601	180945
DSG4_HUMAN	Desmoglein-4 OS=Homo sapiens GN=DSG4 PE=1 SV=1	1	21.76	38624.9	406552	84761.7	176646
DKK3_HUMAN	Dickkopf-related protein 3 OS=Homo sapiens GN=DKK3 PE=1 SV=2	4	204.75	166335	238540	111216	172030
ENPP2_HUMAN	Ectonucleotide pyrophosphatase/phosphodiesterase family member 2 OS=Homo sapiens GN=ENPP2 PE=1 SV=3	4	157.9	150379	227558	136446	171461
CATD_HUMAN	Cathepsin D OS=Homo sapiens GN=CTSD PE=1 SV=1	6	229.57	147048	141870	224606	171175
B3A4_HUMAN	Anion exchange protein 4 OS=Homo sapiens GN=SLC4A9 PE=2 SV=2	1	20.97	155419	189457	168286	171054
CC171_HUMAN	Coiled-coil domain-containing protein 171 OS=Homo sapiens GN=CCDC171 PE=2 SV=1	2	54.74	71136.6	268616	172657	170803
FSCN1_HUMAN	Fascin OS=Homo sapiens GN=FSCN1 PE=1 SV=3	10	374.22	193713	118993	189315	167341
FMOD_HUMAN	Fibromodulin OS=Homo sapiens GN=FMOD PE=1 SV=2	2	114.69	167527	169632	154178	163779
TGFB1_HUMAN	Transforming growth factor beta-1 OS=Homo sapiens GN=TGFB1 PE=1 SV=2	4	133.14	155686	157685	175640	163004
PTGDS_HUMAN	Prostaglandin-H2 D-isomerase OS=Homo sapiens GN=PTGDS PE=1 SV=1	2	95.62	139796	65499.2	283875	163057
TSG6_HUMAN	Tumor necrosis factor-inducible gene 6 protein OS=Homo sapiens GN=TNFAIP6 PE=1 SV=2	5	234.22	114033	171390	192095	159173
CSTN1_HUMAN	Calsyntenin-1 OS=Homo sapiens GN=CLSTN1 PE=1 SV=1	7	259.54	136623	218012	120229	158288
CD44_HUMAN	CD44 antigen OS=Homo sapiens GN=CD44 PE=1 SV=3	6	287.71	161274	187948	123075	157432
AAPK1_HUMAN	5'-AMP-activated protein kinase catalytic subunit alpha-1 OS=Homo sapiens GN=PRKAA1 PE=1 SV=4	1	20.21	11041.4	436576	19884	155834
TRFE_HUMAN	Serotransferrin OS=Homo sapiens GN=TF PE=1 SV=3	2	43.7	27462.9	327280	111990	155578
ANXA1_HUMAN	Annexin A1 OS=Homo sapiens GN=ANXA1 PE=1 SV=2	10	439.04	97408.3	196482	171888	155259
TR11B_HUMAN	Tumor necrosis factor receptor superfamily member 11B OS=Homo sapiens GN=TNFRSF11B PE=1 SV=3	4	168.5	176527	175526	113070	155041
DAG1_HUMAN	Dystroglycan OS=Homo sapiens GN=DAG1 PE=1 SV=2	3	111.86	181376	179475	100802	153884
TUT7_HUMAN	Terminal uridylyltransferase 7 OS=Homo sapiens GN=ZCCHC6 PE=1 SV=1	1	61.07	160906	136497	160615	152672
EF1A1_HUMAN	Elongation factor 1-alpha 1 OS=Homo sapiens GN=EEF1A1 PE=1 SV=1	2	328.88	81173.7	43850.7	332742	152589
SVEP1_HUMAN	Sushi, von Willebrand factor type A, EGF and pentraxin domain-containing protein 1 OS=Homo sapiens GN=SVEP1 PE=1 SV=3	8	321.23	134302	215752	105753	151935
COEA1_HUMAN	Collagen alpha-1(XIV) chain OS=Homo sapiens GN=COL14A1 PE=1 SV=3	6	234.43	161529	178981	114805	151772
6PGD_HUMAN	6-phosphogluconate dehydrogenase, decarboxylating OS=Homo sapiens GN=PGD PE=1 SV=3	7	268.01	151553	75423.1	226739	151238
B4GT1_HUMAN;B4GT5_HUMAN	Beta-1,4-galactosyltransferase 1 OS=Homo sapiens GN=B4GALT1 PE=1 SV=5	6	208.66	116462	212999	112486	147316
FETA_HUMAN	Alpha-fetoprotein OS=Homo sapiens GN=AFP PE=1 SV=1	2	80.93	81282.9	258647	97043.6	145658
KLH15_HUMAN	Kelch-like protein 15 OS=Homo sapiens GN=KLHL15 PE=1 SV=2	1	23.7	119529	139119	171492	143380
PPGB_HUMAN	Lysosomal protective protein OS=Homo sapiens GN=CTSA PE=1 SV=2	5	182.74	75659.9	166900	186144	142901
KIF2C_HUMAN	Kinesin-like protein KIF2C OS=Homo sapiens GN=KIF2C PE=1 SV=2	1	21.74	71910.3	259682	91350	140981
ATPB_HUMAN	ATP synthase subunit beta, mitochondrial OS=Homo sapiens GN=ATP5B PE=1 SV=3	7	361.39	178028	80664.7	159490	139394
ATPA_HUMAN	ATP synthase subunit alpha, mitochondrial OS=Homo sapiens GN=ATP5A1 PE=1 SV=1	11	444.81	162759	80205.8	174550	139172
HSPB1_HUMAN	Heat shock protein beta-1 OS=Homo sapiens GN=HSPB1 PE=1 SV=2	7	352.7	168550	146929	94626.3	136702
PENK_HUMAN	Proenkephalin-A OS=Homo sapiens GN=PENK PE=1 SV=1	7	366.83	173330	155866	78661.7	135953
PPIA_HUMAN;PAL4A_HUMAN	Peptidyl-prolyl cis-trans isomerase A OS=Homo sapiens GN=PPIA PE=1 SV=2	7	239.04	105760	129941	167970	134557
CATK_HUMAN	Cathepsin K OS=Homo sapiens GN=CTSK PE=1 SV=1	6	230.93	97587.4	72251.8	232153	133997
WDR1_HUMAN	WD repeat-containing protein 1 OS=Homo sapiens GN=WDR1 PE=1 SV=4	5	182.4	168318	147157	82489.3	132655
GARS_HUMAN	Glycine--tRNA ligase OS=Homo sapiens GN=GARS PE=1 SV=3	5	240.61	219944	54206.8	110315	128155
DYH8_HUMAN	Dynein heavy chain 8, axonemal OS=Homo sapiens GN=DNAH8 PE=1 SV=2	1	26.24	92730.1	23326.1	261649	125902
SODM_HUMAN	Superoxide dismutase [Mn], mitochondrial OS=Homo sapiens GN=SOD2 PE=1 SV=2	4	190.05	178497	76442.7	120892	125277
PCDA9_HUMAN	Protocadherin alpha-9 OS=Homo sapiens GN=PCDHA9 PE=2 SV=1	1	24.15	9803.77	333781	32181.9	125255
IBP5_HUMAN	Insulin-like growth factor-binding protein 5 OS=Homo sapiens GN=IGFBP5 PE=1 SV=1	4	139.86	98018.1	186929	90591.1	125179
NPC2_HUMAN	Epididymal secretory protein E1 OS=Homo sapiens GN=NPC2 PE=1 SV=1	3	107.8	83157.6	161214	129862	124745
GCNT3_HUMAN	Beta-1,3-galactosyl-O-glycosyl-glycoprotein beta-1,6-N-acetylglucosaminyltransferase 3 OS=Homo sapiens GN=GCNT3 PE=2 SV=1	1	23.45	48856.9	177748	143834	123480
UFO_HUMAN	Tyrosine-protein kinase receptor UFO OS=Homo sapiens GN=AXL PE=1 SV=3	3	143.43	146273	144497	79147.3	123306
TPP1_HUMAN	Tripeptidyl-peptidase 1 OS=Homo sapiens GN=TPP1 PE=1 SV=2	4	241.85	101579	134111	131761	122483
VTNC_HUMAN	Vitronectin OS=Homo sapiens GN=VTN PE=1 SV=1	1	52.83	92677.2	98298.5	171652	120876
PAMR1_HUMAN	Inactive serine protease PAMR1 OS=Homo sapiens GN=PAMR1 PE=1 SV=1	4	153.37	177685	62752.7	117786	119408
ANT3_HUMAN	Antithrombin-III OS=Homo sapiens GN=SERPINC1 PE=1 SV=1	2	120.07	68181.6	126834	162571	119196
MA1A1_HUMAN	Mannosyl-oligosaccharide 1,2-alpha-mannosidase IA OS=Homo sapiens GN=MAN1A1 PE=1 SV=3	5	225.47	157914	124215	74320	118816
NET1_HUMAN	Netrin-1 OS=Homo sapiens GN=NTN1 PE=1 SV=2	4	156.61	79265.9	138876	137263	118469
SODE_HUMAN	Extracellular superoxide dismutase [Cu-Zn] OS=Homo sapiens GN=SOD3 PE=1 SV=2	7	333.45	99676.2	152158	99996.8	117277
TFR1_HUMAN	Transferrin receptor protein 1 OS=Homo sapiens GN=TFRC PE=1 SV=2	7	252.98	103871	156158	88057.2	116029
COR1C_HUMAN	Coronin-1C OS=Homo sapiens GN=CORO1C PE=1 SV=1	7	413.1	143788	96021.6	104574	114794
SHOC2_HUMAN	Leucine-rich repeat protein SHOC-2 OS=Homo sapiens GN=SHOC2 PE=1 SV=2	1	39.38	204936	52903.3	83718.2	113852
PDIA6_HUMAN	Protein disulfide-isomerase A6 OS=Homo sapiens GN=PDIA6 PE=1 SV=1	5	350.38	143040	65065.4	131825	113310
FBLN3_HUMAN	EGF-containing fibulin-like extracellular matrix protein 1 OS=Homo sapiens GN=EFEMP1 PE=1 SV=2	9	399.51	110595	122820	105476	112964
FBN2_HUMAN	Fibrillin-2 OS=Homo sapiens GN=FBN2 PE=1 SV=3	6	275.79	97771.6	149753	87355.8	111627
[truncated: 869 more rows]

## Sheet: ERS-PAT4
				ERS-FAM4
[truncated: 1,051 more rows]
