# Supplementary material for: Pathogenesis of Enamel-Renal Syndrome Associated Gingival Fibromatosis: A Proteomic Approach
Source: Front Endocrinol (Lausanne). 2021 Oct 29;12:752568. doi: 10.3389/fendo.2021.752568 (PMC8586505; doi:10.3389/fendo.2021.752568)
Supplement: Supplementary file 4 [file Table_3.xlsx]

## Sheet: Feuil1
	Accession	Description	ECM	EC Vesicles	Calcium	Complement	unknown function
	1433E_HUMAN	14-3-3 protein epsilon		X
	1433G_HUMAN	14-3-3 protein gamma		X
	1433T_HUMAN	14-3-3 protein theta		X
	1433Z_HUMAN	14-3-3 protein zeta/delta		X
	4F2_HUMAN	4F2 cell-surface antigen heavy chain		X
	5NTD_HUMAN	5'-nucleotidase		X
	6PGD_HUMAN	6-phosphogluconate dehydrogenase, decarboxylating		X
	A4_HUMAN	Amyloid-beta A4 protein	X
	AATM_HUMAN	Aspartate aminotransferase, mitochondrial		X
	ACTA_HUMAN	Actin, aortic smooth muscle		X
	ACTB_HUMAN	Actin, cytoplasmic 1		X
	ACTN1_HUMAN	Alpha-actinin-1		X
	ACTN4_HUMAN	Alpha-actinin-4		X
	ADA10_HUMAN	Disintegrin and metalloproteinase domain-containing protein 10	X
	AEBP1_HUMAN	Adipocyte enhancer-binding protein 1	X
	AHNK_HUMAN	Neuroblast differentiation-associated protein AHNAK		X
	ALBU_HUMAN	Serum albumin	X
	ALDOA_HUMAN	Fructose-bisphosphate aldolase A		X
	AMD_HUMAN	Peptidyl-glycine alpha-amidating monooxygenase		X
	ANGL2_HUMAN	Angiopoietin-related protein 2	X
	ANGP1_HUMAN	Angiopoietin-1	X
	ANT3_HUMAN	Antithrombin-III	X
	ANXA1_HUMAN	Annexin A1	X		X
	ANXA2_HUMAN	Annexin A2	X
	ANXA5_HUMAN	Annexin A5	X
	ANXA6_HUMAN	Annexin A6	X		X
	ATPA_HUMAN	ATP synthase subunit alpha, mitochondrial		X
	ATPB_HUMAN	ATP synthase subunit beta, mitochondrial					X
	B4GT1_HUMAN	Beta-1,4-galactosyltransferase 1		X
	BGH3_HUMAN	Transforming growth factor-beta-induced protein ig-h3	X
	BMP1_HUMAN	Bone morphogenetic protein 1	X
	C1R_HUMAN	Complement C1r subcomponent	X			X
	C1S_HUMAN	Complement C1s subcomponent	X			X
	CAD13_HUMAN	Cadherin-13		X
	CADH6_HUMAN	Cadherin-6					X
	CALD1_HUMAN	Caldesmon		X
	CALR_HUMAN	Calreticulin	X		X
	CALU_HUMAN	Calumenin	X		X
	CALX_HUMAN	Calnexin		X
	CAN2_HUMAN	Calpain-2 catalytic subunit		X
	CAPG_HUMAN	Macrophage-capping protein		X
	CAPZB_HUMAN	F-actin-capping protein subunit beta		X
	CATB_HUMAN	Cathepsin B	X
	CATD_HUMAN	Cathepsin D	X
	CATF_HUMAN	Cathepsin F	X
	CATK_HUMAN	Cathepsin K	X
	CATZ_HUMAN	Cathepsin Z	X
	CAVN1_HUMAN	Caveolae-associated protein 1					X
	CBPE_HUMAN	Carboxypeptidase E	X
	CBPQ_HUMAN	Carboxypeptidase Q	X
	CBR1_HUMAN	Carbonyl reductase [NADPH] 1		X
	CD109_HUMAN	CD109 antigen		X
	CD14_HUMAN	Monocyte differentiation antigen CD14		X
	CD166_HUMAN	CD166 antigen					X
	CD44_HUMAN	CD44 antigen		X
	CEMIP_HUMAN	Cell migration-inducing and hyaluronan-binding protein	X
	CFAB_HUMAN	Complement factor B	X			X
	CH60_HUMAN	60 kDa heat shock protein, mitochondrial					X
	CKAP4_HUMAN	Cytoskeleton-associated protein 4		X
	CLC11_HUMAN	C-type lectin domain family 11 member A	X
	CLH1_HUMAN	Clathrin heavy chain 1		X
	CLIC1_HUMAN	Chloride intracellular channel protein 1		X
	CLIC4_HUMAN	Chloride intracellular channel protein 4		X
	CLUS_HUMAN	Clusterin	X
	CO1A1_HUMAN	Collagen alpha-1(I) chain	X
	CO1A2_HUMAN	Collagen alpha-2(I) chain	X
	CO3_HUMAN	Complement C3	X			X
	CO3A1_HUMAN	Collagen alpha-1(III) chain	X
	CO4A_HUMAN	Complement C4-A	X			X
	CO5A1_HUMAN	Collagen alpha-1(V) chain	X
	CO5A2_HUMAN	Collagen alpha-2(V) chain	X
	CO6A1_HUMAN	Collagen alpha-1(VI) chain	X
	CO6A2_HUMAN	Collagen alpha-2(VI) chain	X
	CO6A3_HUMAN	Collagen alpha-3(VI) chain	X
	CO8A1_HUMAN	Collagen alpha-1(VIII) chain	X
	CO9_HUMAN	Complement component C9	X			X
	COCA1_HUMAN	Collagen alpha-1(XII) chain	X
	COEA1_HUMAN	Collagen alpha-1(XIV) chain	X
	COFA1_HUMAN	Collagen alpha-1(XV) chain	X
	COGA1_HUMAN	Collagen alpha-1(XVI) chain	X
	COPB2_HUMAN	Coatomer subunit beta'		X
	COPG1_HUMAN	Coatomer subunit gamma-1		X
	COR1C_HUMAN	Coronin-1C		X
	CPXM2_HUMAN	Inactive carboxypeptidase-like protein X2	X
	CSPG2_HUMAN	Versican core protein	X
	CSTN1_HUMAN	Calsyntenin-1					X
	CTHR1_HUMAN	Collagen triple helix repeat-containing protein 1	X
	DKK3_HUMAN	Dickkopf-related protein 3	X
	DPP2_HUMAN	Dipeptidyl peptidase 2	X
	DPYL2_HUMAN	Dihydropyrimidinase-related protein 2		X
	DPYL3_HUMAN	Dihydropyrimidinase-related protein 3		X
	ECHA_HUMAN	Trifunctional enzyme subunit alpha, mitochondrial					X
	ECM1_HUMAN	Extracellular matrix protein 1	X
	EDIL3_HUMAN	EGF-like repeat and discoidin I-like domain-containing protein 3	X
	EF1A1_HUMAN	Elongation factor 1-alpha 1		X
	EF1G_HUMAN	Elongation factor 1-gamma		X
	EF2_HUMAN	Elongation factor 2		X
	EMIL1_HUMAN	EMILIN-1	X
	ENOA_HUMAN	Alpha-enolase		X
	ENPL_HUMAN	Endoplasmin		X
	ENPP2_HUMAN	Ectonucleotide pyrophosphatase/phosphodiesterase family member 2	X
	FBLN1_HUMAN	Fibulin-1	X
	FBLN2_HUMAN	Fibulin-2	X
	FBLN3_HUMAN	EGF-containing fibulin-like extracellular matrix protein 1	X
	FBLN4_HUMAN	EGF-containing fibulin-like extracellular matrix protein 2	X
	FBLN5_HUMAN	Fibulin-5	X
	FBN1_HUMAN	Fibrillin-1	X
	FBN2_HUMAN	Fibrillin-2	X
	FETUA_HUMAN	Alpha-2-HS-glycoprotein	X		X
	FINC_HUMAN	Fibronectin OS	X
	FKB10_HUMAN	Peptidyl-prolyl cis-trans isomerase FKBP10		X
	FLNA_HUMAN	Filamin-A		X
	FLNC_HUMAN	Filamin-C		X
	FMOD_HUMAN	Fibromodulin	X
	FNDC1_HUMAN	Fibronectin type III domain-containing protein 1	X
	FSCN1_HUMAN	Fascin		X
	FST_HUMAN	Follistatin	X
	FSTL1_HUMAN	Follistatin-related protein 1	X
	G3P_HUMAN	Glyceraldehyde-3-phosphate dehydrogenase		X
	GANAB_HUMAN	Neutral alpha-glucosidase AB		X
	GARS_HUMAN	Glycine--tRNA ligase		X
	GAS6_HUMAN	Growth arrest-specific protein 6	X
	GDIB_HUMAN	Rab GDP dissociation inhibitor beta		X
	GDN_HUMAN	Glia-derived nexin	X
	GELS_HUMAN	Gelsolin					X
	GLCM_HUMAN	Glucosylceramidase		X
	GLGB_HUMAN	1,4-alpha-glucan-branching enzyme					X
	GNAI2_HUMAN	Guanine nucleotide-binding protein G(i) subunit alpha-2		X
	GNS_HUMAN	N-acetylglucosamine-6-sulfatase		X
	GPC1_HUMAN	Glypican-1	X
	GREM1_HUMAN	Gremlin-1	X
	GRP75_HUMAN	Stress-70 protein, mitochondrial		X
	GRP78_HUMAN	78 kDa glucose-regulated protein		X
	GSTP1_HUMAN	Glutathione S-transferase P		X
	HBA_HUMAN	Hemoglobin subunit alpha					X
	HEXA_HUMAN	Beta-hexosaminidase subunit alpha		X
	HEXB_HUMAN	Beta-hexosaminidase subunit beta		X
	HNRH1_HUMAN	Heterogeneous nuclear ribonucleoprotein H		X
	HNRPC_HUMAN	Heterogeneous nuclear ribonucleoproteins C1/C2		X
	HNRPD_HUMAN	Heterogeneous nuclear ribonucleoprotein D0		X
	HNRPK_HUMAN	Heterogeneous nuclear ribonucleoprotein K		X
	HS71A_HUMAN	Heat shock 70 kDa protein 1A					X
	HS90A_HUMAN	Heat shock protein HSP 90-alpha		X
	HS90B_HUMAN	Heat shock protein HSP 90-beta		X
	HSP7C_HUMAN	Heat shock cognate 71 kDa protein		X
	HSPB1_HUMAN	Heat shock protein beta-1		X
	HTRA1_HUMAN	Serine protease HTRA1	X
	IBP2_HUMAN	Insulin-like growth factor-binding protein 2	X
	IBP3_HUMAN	Insulin-like growth factor-binding protein 3	X
	IBP5_HUMAN	Insulin-like growth factor-binding protein 5	X
	IBP7_HUMAN	Insulin-like growth factor-binding protein 7	X
	IC1_HUMAN	Plasma protease C1 inhibitor	X
	IF4A1_HUMAN	Eukaryotic initiation factor 4A-I		X
	IL6_HUMAN	Interleukin-6	X
	ILF3_HUMAN	Interleukin enhancer-binding factor 3		X
	IMB1_HUMAN	Importin subunit beta-1		X
	IQGA1_HUMAN	Ras GTPase-activating-like protein IQGAP1
	ITIH2_HUMAN	Inter-alpha-trypsin inhibitor heavy chain H2	X
	ITIH5_HUMAN	Inter-alpha-trypsin inhibitor heavy chain H5	X
	KCD12_HUMAN	BTB/POZ domain-containing protein KCTD12					X
	KPYM_HUMAN	Pyruvate kinase		X
	LAMA4_HUMAN	Laminin subunit alpha-4	X
	LAMB1_HUMAN	Laminin subunit beta-1	X
	LAMB2_HUMAN	Laminin subunit beta-2	X
	LAMC1_HUMAN	Laminin subunit gamma-1	X
	LDHA_HUMAN	L-lactate dehydrogenase A chain		X
	LDHB_HUMAN	L-lactate dehydrogenase B chain		X
	LEG1_HUMAN	Galectin-1	X
	LG3BP_HUMAN	Galectin-3-binding protein	X
	LMNA_HUMAN	Prelamin-A/C		X
	LOXL1_HUMAN	Lysyl oxidase homolog 1	X
	LOXL2_HUMAN	Lysyl oxidase homolog 2	X
	LOXL3_HUMAN	Lysyl oxidase homolog 3	X
	LRP1_HUMAN	Prolow-density lipoprotein receptor-related protein 1		X
	LTBP1_HUMAN	Latent-transforming growth factor beta-binding protein 1	X
	LTBP2_HUMAN	Latent-transforming growth factor beta-binding protein 2	X
	LUM_HUMAN	Lumican	X
	LYOX_HUMAN	Protein-lysine 6-oxidase	X
	MA1A1_HUMAN	Mannosyl-oligosaccharide 1,2-alpha-mannosidase IA		X
	MAMC2_HUMAN	MAM domain-containing protein 2		X
	MAP1B_HUMAN	Microtubule-associated protein 1B					X
	MARCS_HUMAN	Myristoylated alanine-rich C-kinase substrate
	MASP1_HUMAN	Mannan-binding lectin serine protease 1	X
	MDHC_HUMAN	Malate dehydrogenase, cytoplasmic		X
	MDHM_HUMAN	Malate dehydrogenase, mitochondrial		X
	MFGM_HUMAN	Lactadherin	X
	MMP1_HUMAN	Interstitial collagenase	X
	MMP2_HUMAN	72 kDa type IV collagenase	X
	MMP3_HUMAN	Stromelysin-1	X
	MOES_HUMAN	Moesin		X
	MXRA5_HUMAN	Matrix-remodeling-associated protein 5	X
	MYH9_HUMAN	Myosin-9		X
	MYL6_HUMAN	Myosin light polypeptide 6		X
	NB5R3_HUMAN	NADH-cytochrome b5 reductase 3		X
	NET1_HUMAN	Netrin-1	X
	NID1_HUMAN	Nidogen-1	X
	NID2_HUMAN	Nidogen-2	X
	NOV_HUMAN	Protein NOV homolog		X
	NPM_HUMAN	Nucleophosmin		X
	NPTX1_HUMAN	Neuronal pentraxin-1		X
	NUCB1_HUMAN	Nucleobindin-1		X
	NUCL_HUMAN	Nucleolin		X
	OLFL3_HUMAN	Olfactomedin-like protein 3	X
	P3H1_HUMAN	Prolyl 3-hydroxylase 1	X
	PAI1_HUMAN	Plasminogen activator inhibitor 1	X
	PAMR1_HUMAN	Inactive serine protease PAMR1	X
	PCBP1_HUMAN	Poly(rC)-binding protein 1		X
	PCOC1_HUMAN	Procollagen C-endopeptidase enhancer 1	X
	PDC6I_HUMAN	Programmed cell death 6-interacting protein		X
	PDGFD_HUMAN	Platelet-derived growth factor D	X
	PDIA1_HUMAN	Protein disulfide-isomerase		X
	PDIA3_HUMAN	Protein disulfide-isomerase A3		X
	PDIA4_HUMAN	Protein disulfide-isomerase A4		X
	PDIA6_HUMAN	Protein disulfide-isomerase A6		X
	PEBP1_HUMAN	Phosphatidylethanolamine-binding protein 1		X
	PEDF_HUMAN	Pigment epithelium-derived factor	X
	PENK_HUMAN	Proenkephalin-A	X
	PEPD_HUMAN	Xaa-Pro dipeptidase		X
	PGBM_HUMAN	Basement membrane-specific heparan sulfate proteoglycan core protein	X
	PGK1_HUMAN	Phosphoglycerate kinase 1		X
	PGS1_HUMAN	Biglycan	X
	PGS2_HUMAN	Decorin	X
	PLEC_HUMAN	Plectin		X
	PLOD1_HUMAN	Procollagen-lysine,2-oxoglutarate 5-dioxygenase 1	X
	PLOD2_HUMAN	Procollagen-lysine,2-oxoglutarate 5-dioxygenase 2	X
	PLOD3_HUMAN	Procollagen-lysine,2-oxoglutarate 5-dioxygenase 3	X
	PLST_HUMAN	Plastin-3		X
	PLTP_HUMAN	Phospholipid transfer protein		X
	PODN_HUMAN	Podocan	X
	POSTN_HUMAN	Periostin	X
	PPGB_HUMAN	Lysosomal protective protein		X
	PPIA_HUMAN	Peptidyl-prolyl cis-trans isomerase A		X
	PPIB_HUMAN	Peptidyl-prolyl cis-trans isomerase B		X
	PRDX1_HUMAN	Peroxiredoxin-1		X
	PRDX2_HUMAN	Peroxiredoxin-2		X
	PRDX3_HUMAN	Thioredoxin-dependent peroxide reductase, mitochondrial		X
	PRDX6_HUMAN	Peroxiredoxin-6		X
	PROF1_HUMAN	Profilin-1		X
	PSG4_HUMAN	Pregnancy-specific beta-1-glycoprotein 4	X
	PSMD2_HUMAN	26S proteasome non-ATPase regulatory subunit 2		X
	PTX3_HUMAN	Pentraxin-related protein PTX3	X
	PXDN_HUMAN	Peroxidasin homolog	X
	QSOX1_HUMAN	Sulfhydryl oxidase 1	X
	RAB5C_HUMAN	Ras-related protein Rab-5C		X
	RENR_HUMAN	Renin receptor		X
	RINI_HUMAN	Ribonuclease inhibitor		X
	RLA0_HUMAN	60S acidic ribosomal protein P0		X
	ROA1_HUMAN	Heterogeneous nuclear ribonucleoprotein A1		X
	ROA2_HUMAN	Heterogeneous nuclear ribonucleoproteins A2/B1		X
	ROA3_HUMAN	Heterogeneous nuclear ribonucleoprotein A3		X
	RS3_HUMAN	40S ribosomal protein S3		X
	RS4X_HUMAN	40S ribosomal protein S4, X isoform		X
	RS8_HUMAN	40S ribosomal protein S8		X
	RS9_HUMAN	40S ribosomal protein S9		X
	RUVB1_HUMAN	RuvB-like 1		X
	SC23A_HUMAN	Protein transport protein Sec23A		X
	SEPT2_HUMAN	Septin-2
	SERA_HUMAN	D-3-phosphoglycerate dehydrogenase		X
	SERC_HUMAN	Phosphoserine aminotransferase		X
	SERPH_HUMAN	Serpin H1	X
	SFRP4_HUMAN	Secreted frizzled-related protein 4	X
	SODC_HUMAN	Superoxide dismutase [Cu-Zn]		X
	SODE_HUMAN	Extracellular superoxide dismutase [Cu-Zn]	X
	SODM_HUMAN	Superoxide dismutase [Mn], mitochondrial		X
	SPB6_HUMAN	Serpin B6	X
	SPON1_HUMAN	Spondin-1	X
	SPON2_HUMAN	Spondin-2	X
	SPRC_HUMAN	SPARC	X
	SRPX_HUMAN	Sushi repeat-containing protein SRPX	X
	SRSF1_HUMAN	Serine/arginine-rich splicing factor 1		X
	STAT1_HUMAN	Signal transducer and activator of transcription 1-alpha/beta		X
	STC2_HUMAN	Stanniocalcin-2	X		X
	SVEP1_HUMAN	Sushi, von Willebrand factor type A, EGF and pentraxin domain-containing protein 1	X
	TAGL_HUMAN	Transgelin		X
	TALDO_HUMAN	Transaldolase		X
	TBB4B_HUMAN	Tubulin beta-4B chain		X
	TBB5_HUMAN	Tubulin beta chain		X
	TCPA_HUMAN	T-complex protein 1 subunit alpha		X
	TCPB_HUMAN	T-complex protein 1 subunit beta		X
	TCPE_HUMAN	T-complex protein 1 subunit epsilon		X
	TCPG_HUMAN	T-complex protein 1 subunit gamma		X
	TCPH_HUMAN	T-complex protein 1 subunit eta		X
	TCPQ_HUMAN	T-complex protein 1 subunit theta		X
	TENA_HUMAN	Tenascin	X
	TERA_HUMAN	Transitional endoplasmic reticulum ATPase		X
	TFR1_HUMAN	Transferrin receptor protein 1		X
	TGBR3_HUMAN	Transforming growth factor beta receptor type 3		X
	TGFB1_HUMAN	Transforming growth factor beta-1	X
	TGFB2_HUMAN	Transforming growth factor beta-2	X
	TGM2_HUMAN	Protein-glutamine gamma-glutamyltransferase 2		X
	THY1_HUMAN	Thy-1 membrane glycoprotein
	TIMP1_HUMAN	Metalloproteinase inhibitor 1	X
	TIMP2_HUMAN	Metalloproteinase inhibitor 2	X
	TKT_HUMAN	Transketolase		X
	TLN1_HUMAN	Talin-1		X
	TPIS_HUMAN	Triosephosphate isomerase		X
	TPP1_HUMAN	Tripeptidyl-peptidase 1		X
	TR11B_HUMAN	Tumor necrosis factor receptor superfamily member 11B		X
	TRFL_HUMAN	Lactotransferrin	X
	TRXR1_HUMAN	Thioredoxin reductase 1, cytoplasmic		X
	TSG6_HUMAN	Tumor necrosis factor-inducible gene 6 protein	X
	TSP1_HUMAN	Thrombospondin-1	X
	TSP2_HUMAN	Thrombospondin-2	X
	UBA1_HUMAN	Ubiquitin-like modifier-activating enzyme 1		X
	UFO_HUMAN	Tyrosine-protein kinase receptor UFO		X
	UGDH_HUMAN	UDP-glucose 6-dehydrogenase		X
	VASN_HUMAN	Vasorin	X
	VDAC2_HUMAN	Voltage-dependent anion-selective channel protein 2		X
	VIME_HUMAN	Vimentin	X
	VINC_HUMAN	Vinculin		X
	VPS35_HUMAN	Vacuolar protein sorting-associated protein 35		X
	WDR1_HUMAN	WD repeat-containing protein 1		X
	WNT5A_HUMAN	Protein Wnt-5a	X
	XRCC6_HUMAN	X-ray repair cross-complementing protein 6					X
	1433F_HUMAN	14-3-3 protein eta		X
	A2MG_HUMAN	Alpha-2-macroglobulin	X
	AAAT_HUMAN	Neutral amino acid transporter B(0)		X
	AATC_HUMAN	Aspartate aminotransferase, cytoplasmic		X
	ACADV_HUMAN	Very long-chain specific acyl-CoA dehydrogenase, mitochondrial		X
	ACTZ_HUMAN	Alpha-centractin		X
	ADHX_HUMAN	Alcohol dehydrogenase class-3		X
	ADT1_HUMAN	ADP/ATP translocase 1		X
	AIFM1_HUMAN	Apoptosis-inducing factor 1, mitochondrial		X
	AK1C1_HUMAN	Aldo-keto reductase family 1 member C1		X
	AMPN_HUMAN	Aminopeptidase N		X
	AN32B_HUMAN	Acidic leucine-rich nuclear phosphoprotein 32 family member B		X
	ANAG_HUMAN	Alpha-N-acetylglucosaminidase		X
	ANPRC_HUMAN	Atrial natriuretic peptide receptor 3		X
	AP2M1_HUMAN	AP-2 complex subunit mu		X
	APOL2_HUMAN	Apolipoprotein L2		X
	ARP2_HUMAN	Actin-related protein 2		X
	ARP3_HUMAN	Actin-related protein 3		X
	ARPC2_HUMAN	Actin-related protein 2/3 complex subunit 2		X
	B2MG_HUMAN	Beta-2-microglobulin	X
	B4GA1_HUMAN	Beta-1,4-glucuronyltransferase 1		X
	BC11B_HUMAN	B-cell lymphoma/leukemia 11B		X
	BGAL_HUMAN	Beta-galactosidase		X
	BTD_HUMAN	Biotinidase		X
	C1QT3_HUMAN	Complement C1q tumor necrosis factor-related protein 3	X
	CAD11_HUMAN	Cadherin-11		X
	CALM1_HUMAN	Calmodulin-1		X
	CATL1_HUMAN	Cathepsin L1	X
	CC171_HUMAN	Coiled-coil domain-containing protein 171		X
	CCBE1_HUMAN	Collagen and calcium-binding EGF domain-containing protein 1	X
	CD248_HUMAN	Endosialin		X
	CDC42_HUMAN	Cell division control protein 42 homolog		X
	CFAH_HUMAN	Complement factor H	X			X
	CO2_HUMAN	Complement C2	X			X
	COF1_HUMAN	Cofilin-1		X
	COL12_HUMAN	Collectin-12	X
	COMP_HUMAN	Cartilage oligomeric matrix protein	X
	COPD_HUMAN	Coatomer subunit delta		X
	CPNE1_HUMAN	Copine-1		X
	CPNE3_HUMAN	Copine-3		X
	CRLF1_HUMAN	Cytokine receptor-like factor 1		X
	DDAH2_HUMAN	N(G),N(G)-dimethylarginine dimethylaminohydrolase 2		X
	DDX17_HUMAN	Probable ATP-dependent RNA helicase DDX17		X
	DDX3X_HUMAN	ATP-dependent RNA helicase DDX3X		X
	DJB11_HUMAN	DnaJ homolog subfamily B member 11		X
	DX39A_HUMAN	ATP-dependent RNA helicase DDX39A		X
	ECHB_HUMAN	Trifunctional enzyme subunit beta, mitochondrial		X
	EFTU_HUMAN	Elongation factor Tu, mitochondrial		X
	EGLN_HUMAN	Endoglin		X
	EMD_HUMAN	Emerin		X
	ESM1_HUMAN	Endothelial cell-specific molecule 1	X
	ESYT1_HUMAN	Extended synaptotagmin-1		X
	ETFB_HUMAN	Electron transfer flavoprotein subunit beta		X
	F10A1_HUMAN	Hsc70-interacting protein		X
	FAAA_HUMAN	Fumarylacetoacetase		X
	FETA_HUMAN	Alpha-fetoprotein	X
	FKBP9_HUMAN	Peptidyl-prolyl cis-trans isomerase FKBP9		X
	FUBP1_HUMAN	Far upstream element-binding protein 1		X
	G6PI_HUMAN	Glucose-6-phosphate isomerase		X
	GALT2_HUMAN	Polypeptide N-acetylgalactosaminyltransferase 2		X
	GBB1_HUMAN	Guanine nucleotide-binding protein G(I)/G(S)/G(T) subunit beta-1		X
	GDIR1_HUMAN	Rho GDP-dissociation inhibitor 1		X
	GLU2B_HUMAN	Glucosidase 2 subunit beta		X
	GOLM1_HUMAN	Golgi membrane protein 1		X
	GPC6_HUMAN	Glypican-6	X
	GPDM_HUMAN	Glycerol-3-phosphate dehydrogenase, mitochondrial		X
	GSHR_HUMAN	Glutathione reductase, mitochondrial		X
	H12_HUMAN	Histone H1.2		X
	H15_HUMAN	Histone H1.5		X
	H2A1B_HUMAN	Histone H2A type 1-B/E		X
	H2B1A_HUMAN	Histone H2B type 1-A		X
	H4_HUMAN	Histone H4		X
	HBB_HUMAN	Hemoglobin subunit beta		X
	HNRPM_HUMAN	Heterogeneous nuclear ribonucleoprotein M		X
	HNRPU_HUMAN	Heterogeneous nuclear ribonucleoprotein U		X
	HSP74_HUMAN	Heat shock 70 kDa protein 4		X
	IBP4_HUMAN	Insulin-like growth factor-binding protein 4	X
	IF4B_HUMAN	Eukaryotic translation initiation factor 4B		X
	IF5A1_HUMAN	Eukaryotic translation initiation factor 5A-1		X
	ISLR_HUMAN	Immunoglobulin superfamily containing leucine-rich repeat protein	X
	KAPCA_HUMAN	cAMP-dependent protein kinase catalytic subunit alpha		X
	LAMA1_HUMAN	Laminin subunit alpha-1	X
	LEG3_HUMAN	Galectin-3	X
	LMAN2_HUMAN	Vesicular integral-membrane protein VIP36		X
	LRC15_HUMAN	Leucine-rich repeat-containing protein 15		X
	MFAP2_HUMAN	Microfibrillar-associated protein 2		X
	MK_HUMAN	Midkine	X
	MLH1_HUMAN	DNA mismatch repair protein Mlh1		X
	MVP_HUMAN	Major vault protein		X
	MYOF_HUMAN	Myoferlin		X
	NAGK_HUMAN	N-acetyl-D-glucosamine kinase		X
	NDKB_HUMAN	Nucleoside diphosphate kinase B		X
	NEGR1_HUMAN	Neuronal growth regulator 1		X
	NEUS_HUMAN	Neuroserpin	X
	NQO1_HUMAN	NAD(P)H dehydrogenase [quinone] 1		X
	NTRI_HUMAN	Neurotrimin		X
	NUCKS_HUMAN	Nuclear ubiquitous casein and cyclin-dependent kinase substrate 1		X
	OBAS1_HUMAN	Putative uncharacterized protein OBSCN-AS1		X
	OLA1_HUMAN	Obg-like ATPase 1		X
	OLFL1_HUMAN	Olfactomedin-like protein 1	X
	OMD_HUMAN	Osteomodulin	X
	PCKGM_HUMAN	Phosphoenolpyruvate carboxykinase [GTP], mitochondrial		X
	PCP_HUMAN	Lysosomal Pro-X carboxypeptidase		X
	PCYOX_HUMAN	Prenylcysteine oxidase 1		X
	PD1L2_HUMAN	Programmed cell death 1 ligand 2		X
	PGFRL_HUMAN	Platelet-derived growth factor receptor-like protein		X
	PGM1_HUMAN	Phosphoglucomutase-1		X
	PGRC2_HUMAN	Membrane-associated progesterone receptor component 2		X
	POP1_HUMAN	Ribonucleases P/MRP protein subunit POP1		X
	PP1A_HUMAN	Serine/threonine-protein phosphatase PP1-alpha catalytic subunit		X
	PPIC_HUMAN	Peptidyl-prolyl cis-trans isomerase C		X
	PRDX4_HUMAN	Peroxiredoxin-4		X
	PRDX5_HUMAN	Peroxiredoxin-5, mitochondrial		X
	PRELP_HUMAN	Prolargin	X
	PROS_HUMAN	Vitamin K-dependent protein S	X			X
	PRS10_HUMAN	26S proteasome regulatory subunit 10B		X
	PRS23_HUMAN	Serine protease 23		X
	PSA6_HUMAN	Proteasome subunit alpha type-6		X
	PSB1_HUMAN	Proteasome subunit beta type-1		X
	PSB3_HUMAN	Proteasome subunit beta type-3		X
	PSB5_HUMAN	Proteasome subunit beta type-5		X
	PSG3_HUMAN	Pregnancy-specific beta-1-glycoprotein 3					X
	PTGDS_HUMAN	Prostaglandin-H2 D-isomerase		X
	PTGR1_HUMAN	Prostaglandin reductase 1		X
	PTN_HUMAN	Pleiotrophin	X
	PTPRK_HUMAN	Receptor-type tyrosine-protein phosphatase kappa		X
	PTPRS_HUMAN	Receptor-type tyrosine-protein phosphatase S		X
	PUR6_HUMAN	Multifunctional protein ADE2		X
	PUR9_HUMAN	Bifunctional purine biosynthesis protein PURH		X
	RAB10_HUMAN	Ras-related protein Rab-10		X
	RAB14_HUMAN	Ras-related protein Rab-14		X
	RAB1B_HUMAN	Ras-related protein Rab-1B		X
	RAP1A_HUMAN	Ras-related protein Rap-1A		X
	RET4_HUMAN	Retinol-binding protein 4	X
	RHG01_HUMAN	Rho GTPase-activating protein 1		X
	RHOA_HUMAN	Transforming protein RhoA		X
	RL13_HUMAN	60S ribosomal protein L13		X
	RPN1_HUMAN	Dolichyl-diphosphooligosaccharide--protein glycosyltransferase subunit 1		X
	RS27A_HUMAN	Ubiquitin-40S ribosomal protein S27a		X
	RS6_HUMAN	40S ribosomal protein S6		X
	RTN4_HUMAN	Reticulon-4		X
	SAHH_HUMAN	Adenosylhomocysteinase		X
	SEPT7_HUMAN	Septin-7		X
	SEPT9_HUMAN	Septin-9		X
	SFPQ_HUMAN	Splicing factor, proline- and glutamine-rich		X
	SFRP1_HUMAN	Secreted frizzled-related protein 1	X
	SFRP2_HUMAN	Secreted frizzled-related protein 2	X
	SHPRH_HUMAN	E3 ubiquitin-protein ligase SHPRH		X
	SHRM3_HUMAN	Protein Shroom3		X
	SRPX2_HUMAN	Sushi repeat-containing protein SRPX2	X
	STC1_HUMAN	Stanniocalcin-1	X		X
	TAGL2_HUMAN	Transgelin-2		X
	TB182_HUMAN	182 kDa tankyrase-1-binding protein		X
	TENX_HUMAN	Tenascin-X	X
	TRFE_HUMAN	Serotransferrin	X
	TSP3_HUMAN	Thrombospondin-3	X
	TUT7_HUMAN	Terminal uridylyltransferase 7		X
	UBP5_HUMAN	Ubiquitin carboxyl-terminal hydrolase 5		X
	VITRN_HUMAN	Vitrin	X
	ZN550_HUMAN	Zinc finger protein 550
One peptid	1A03_HUMAN	HLA class I histocompatibility antigen, A-3 alpha chain		X
	1B41_HUMAN	HLA class I histocompatibility antigen, B-41 alpha chain		X
	1C12_HUMAN	HLA class I histocompatibility antigen, Cw-12 alpha chain		X
	ARC1B_HUMAN	Actin-related protein 2/3 complex subunit 1B		X
	ARF4_HUMAN	ADP-ribosylation factor 4		X
	ASAH1_HUMAN	Acid ceramidase		X
	ASPH_HUMAN	Aspartyl/asparaginyl beta-hydroxylase		X
	BAG2_HUMAN	BAG family molecular chaperone regulator 2		X
	CAB45_HUMAN	45 kDa calcium-binding protein		X
	CAP1_HUMAN	Adenylyl cyclase-associated protein 1		X
	CAZA1_HUMAN	F-actin-capping protein subunit alpha-1		X
	CISY_HUMAN	Citrate synthase, mitochondrial		X
	COR1B_HUMAN	Coronin-1B		X
	DAG1_HUMAN	Dystroglycan		X
	EF1D_HUMAN	Elongation factor 1-delta		X
	EHD2_HUMAN	EH domain-containing protein 2		X
	ERP44_HUMAN	Endoplasmic reticulum resident protein 44		X
	FLRT2_HUMAN	Leucine-rich repeat transmembrane protein FLRT2		X
	FUBP2_HUMAN	Far upstream element-binding protein 2		X
	G6PD_HUMAN	Glucose-6-phosphate 1-dehydrogenase		X
	GGH_HUMAN	Gamma-glutamyl hydrolase		X
	GPNMB_HUMAN	Transmembrane glycoprotein NMB		X
	HNRPQ_HUMAN	Heterogeneous nuclear ribonucleoprotein Q		X
	HPLN1_HUMAN	Hyaluronan and proteoglycan link protein 1	X
	IDHC_HUMAN	Isocitrate dehydrogenase [NADP] cytoplasmic		X
	ILF2_HUMAN	Interleukin enhancer-binding factor 2		X
	LAMP1_HUMAN	Lysosome-associated membrane glycoprotein 1		X
	LYAG_HUMAN	Lysosomal alpha-glucosidase		X
	MFAP4_HUMAN	Microfibril-associated glycoprotein 4		X
	MRC2_HUMAN	C-type mannose receptor 2		X
	MX1_HUMAN	Interferon-induced GTP-binding protein Mx1		X
	NAMPT_HUMAN	Nicotinamide phosphoribosyltransferase		X
	NEUR1_HUMAN	Sialidase-1		X
	NFASC_HUMAN	Neurofascin		X
	NIBL1_HUMAN	Niban-like protein 1		X
	NPC2_HUMAN	Epididymal secretory protein E1	X
	OST48_HUMAN	Dolichyl-diphosphooligosaccharide--protein glycosyltransferase 48 kDa subunit		X
	PAI2_HUMAN	Plasminogen activator inhibitor 2	X
	PLBL2_HUMAN	Putative phospholipase B-like 2		X
	PRS7_HUMAN	26S proteasome regulatory subunit 7		X
	PSA3_HUMAN	Proteasome subunit alpha type-3		X
	PTK7_HUMAN	Inactive tyrosine-protein kinase 7		X
	RACK1_HUMAN	Receptor of activated protein C kinase 1		X
	RCN1_HUMAN	Reticulocalbin-1		X
	RS2_HUMAN	40S ribosomal protein S2		X
	RS3A_HUMAN	40S ribosomal protein S3a		X
	RSSA_HUMAN	40S ribosomal protein SA		X
	SEPR_HUMAN	Prolyl endopeptidase FAP	X
	SET_HUMAN	Protein SET		X
	SPHM_HUMAN	N-sulphoglucosamine sulphohydrolase		X
	STOM_HUMAN	Erythrocyte band 7 integral membrane protein		X
	SYDC_HUMAN	Aspartate--tRNA ligase, cytoplasmic		X
	SYWC_HUMAN	Tryptophan--tRNA ligase, cytoplasmic		X
	TBA1C_HUMAN	Tubulin alpha-1C chain		X
	TCPD_HUMAN	T-complex protein 1 subunit delta		X
	THIO_HUMAN	Thioredoxin		X
	TPM3_HUMAN	Tropomyosin alpha-3 chain		X
	TXND5_HUMAN	Thioredoxin domain-containing protein 5		X
	UGPA_HUMAN	UTP--glucose-1-phosphate uridylyltransferase		X
	UROK_HUMAN	Urokinase-type plasminogen activator	X
	VDAC1_HUMAN	Voltage-dependent anion-selective channel protein 1		X
