# Supplementary material for: Pathogenesis of Enamel-Renal Syndrome Associated Gingival Fibromatosis: A Proteomic Approach
Source: Front Endocrinol (Lausanne). 2021 Oct 29;12:752568. doi: 10.3389/fendo.2021.752568 (PMC8586505; doi:10.3389/fendo.2021.752568)
Supplement: Supplementary file 5 [file Table_4.xlsx]

## Sheet: GO Molecular Function
GO terms: Molecular Function
	ID	Name	pValue	FDR B&H	FDR B&Y	Bonferroni	Genes from Input	Genes in Annotation
1	GO:0005201	extracellular matrix structural constituent	7.382E-85	3.071E-82	2.030E-81	3.071E-82	62	185
2	GO:0005198	structural molecule activity	4.696E-46	9.768E-44	6.456E-43	1.954E-43	63	743
3	GO:0005518	collagen binding	8.911E-31	1.236E-28	8.167E-28	3.707E-28	24	82
4	GO:0005539	glycosaminoglycan binding	8.596E-26	8.940E-24	5.909E-23	3.576E-23	30	252
5	GO:0005102	signaling receptor binding	5.808E-24	4.833E-22	3.194E-21	2.416E-21	64	1842
6	GO:0002020	protease binding	1.035E-22	7.176E-21	4.743E-20	4.306E-20	31	350
7	GO:0008233	peptidase activity	2.736E-22	1.626E-20	1.075E-19	1.138E-19	44	868
8	GO:0005178	integrin binding	4.904E-22	2.550E-20	1.685E-19	2.040E-19	23	157
9	GO:0019838	growth factor binding	2.418E-21	1.118E-19	7.386E-19	1.006E-18	23	168
10	GO:0004175	endopeptidase activity	1.300E-20	5.407E-19	3.574E-18	5.407E-18	37	640
11	GO:0008201	heparin binding	2.650E-19	1.002E-17	6.623E-17	1.102E-16	22	181
12	GO:0008236	serine-type peptidase activity	3.455E-18	1.198E-16	7.915E-16	1.437E-15	25	289
13	GO:0017171	serine hydrolase activity	5.217E-18	1.669E-16	1.103E-15	2.170E-15	25	294
14	GO:1901681	sulfur compound binding	5.659E-18	1.682E-16	1.111E-15	2.354E-15	25	295
15	GO:0061134	peptidase regulator activity	7.145E-18	1.981E-16	1.310E-15	2.972E-15	23	238
16	GO:0004252	serine-type endopeptidase activity	9.937E-18	2.584E-16	1.707E-15	4.134E-15	24	271
17	GO:0044877	protein-containing complex binding	1.605E-17	3.855E-16	2.548E-15	6.675E-15	51	1565
18	GO:0030020	extracellular matrix structural constituent conferring tensile strength	1.668E-17	3.855E-16	2.548E-15	6.940E-15	13	42
19	GO:0061135	endopeptidase regulator activity	2.045E-17	4.478E-16	2.960E-15	8.508E-15	21	194
20	GO:0043394	proteoglycan binding	6.460E-17	1.344E-15	8.880E-15	2.687E-14	13	46
21	GO:0004866	endopeptidase inhibitor activity	9.187E-17	1.820E-15	1.203E-14	3.822E-14	20	182
22	GO:0030414	peptidase inhibitor activity	1.937E-16	3.662E-15	2.420E-14	8.056E-14	20	189
23	GO:0004867	serine-type endopeptidase inhibitor activity	4.971E-15	8.990E-14	5.942E-13	2.068E-12	15	98
24	GO:0001968	fibronectin binding	6.380E-15	1.106E-13	7.309E-13	2.654E-12	11	36
25	GO:0004857	enzyme inhibitor activity	7.188E-15	1.196E-13	7.905E-13	2.990E-12	25	400
26	GO:0050839	cell adhesion molecule binding	7.200E-14	1.152E-12	7.614E-12	2.995E-11	28	573
27	GO:0030021	extracellular matrix structural constituent conferring compression resistance	1.447E-13	2.230E-12	1.474E-11	6.021E-11	9	23
28	GO:0050840	extracellular matrix binding	2.284E-13	3.393E-12	2.243E-11	9.501E-11	12	64
29	GO:0005509	calcium ion binding	5.493E-13	7.880E-12	5.208E-11	2.285E-10	31	773
30	GO:0030023	extracellular matrix constituent conferring elasticity	9.432E-13	1.308E-11	8.644E-11	3.924E-10	7	11
31	GO:0097493	structural molecule activity conferring elasticity	4.835E-12	6.488E-11	4.288E-10	2.011E-9	7	13
32	GO:0030545	signaling receptor regulator activity	6.175E-11	8.028E-10	5.306E-9	2.569E-8	24	553
33	GO:0005520	insulin-like growth factor binding	8.881E-11	1.120E-9	7.399E-9	3.695E-8	8	29
34	GO:0048018	receptor ligand activity	2.001E-9	2.449E-8	1.618E-7	8.326E-7	21	501
35	GO:0030546	signaling receptor activator activity	2.305E-9	2.727E-8	1.802E-7	9.590E-7	21	505
36	GO:0031995	insulin-like growth factor II binding	2.360E-9	2.727E-8	1.802E-7	9.816E-7	5	8
37	GO:0004720	protein-lysine 6-oxidase activity	2.560E-8	2.879E-7	1.902E-6	1.065E-5	4	5
38	GO:0030234	enzyme regulator activity	4.017E-8	4.397E-7	2.906E-6	1.671E-5	32	1288
39	GO:0031994	insulin-like growth factor I binding	5.238E-8	5.448E-7	3.600E-6	2.179E-5	5	13
40	GO:0048407	platelet-derived growth factor binding	5.238E-8	5.448E-7	3.600E-6	2.179E-5	5	13
41	GO:0008083	growth factor activity	1.925E-7	1.953E-6	1.291E-5	8.008E-5	11	166
42	GO:0043236	laminin binding	3.936E-7	3.899E-6	2.577E-5	1.637E-4	6	34
43	GO:0033823	procollagen glucosyltransferase activity	6.191E-7	5.854E-6	3.869E-5	2.576E-4	3	3
44	GO:0008475	procollagen-lysine 5-dioxygenase activity	6.191E-7	5.854E-6	3.869E-5	2.576E-4	3	3
45	GO:0005507	copper ion binding	1.500E-6	1.387E-5	9.164E-5	6.240E-4	7	66
46	GO:0070815	peptidyl-lysine 5-dioxygenase activity	2.440E-6	2.207E-5	1.458E-4	1.015E-3	3	4
47	GO:0048029	monosaccharide binding	7.080E-6	6.267E-5	4.142E-4	2.945E-3	7	83
48	GO:0016641	oxidoreductase activity, acting on the CH-NH2 group of donors, oxygen as acceptor	8.658E-6	7.504E-5	4.959E-4	3.602E-3	4	16
49	GO:0008237	metallopeptidase activity	1.249E-5	1.060E-4	7.008E-4	5.196E-3	10	208
50	GO:0016638	oxidoreductase activity, acting on the CH-NH2 group of donors	2.244E-5	1.830E-4	1.210E-3	9.335E-3	4	20

## Sheet: GO Biological Process
Biological Process
	ID	Name	pValue	FDR B&H	FDR B&Y	Bonferroni	Genes from Input	Genes in Annotation
1	GO:0030198	extracellular matrix organization	3.792E-82	9.393E-79	8.384E-78	1.601E-78	76	431
2	GO:0043062	extracellular structure organization	4.581E-82	9.393E-79	8.384E-78	1.934E-78	76	432
3	GO:0045229	external encapsulating structure organization	6.673E-82	9.393E-79	8.384E-78	2.818E-78	76	434
4	GO:0022610	biological adhesion	1.685E-42	1.779E-39	1.588E-38	7.115E-39	79	1578
5	GO:0007155	cell adhesion	1.314E-41	1.110E-38	9.906E-38	5.549E-38	78	1571
6	GO:0030199	collagen fibril organization	3.530E-38	2.485E-35	2.218E-34	1.491E-34	26	63
7	GO:0001944	vasculature development	1.370E-27	8.265E-25	7.377E-24	5.785E-24	50	903
8	GO:0001568	blood vessel development	1.871E-26	9.209E-24	8.219E-23	7.900E-23	48	866
9	GO:0001501	skeletal system development	1.963E-26	9.209E-24	8.219E-23	8.288E-23	41	583
10	GO:0016477	cell migration	8.552E-25	3.611E-22	3.223E-21	3.611E-21	64	1812
11	GO:0032963	collagen metabolic process	5.786E-24	2.221E-21	1.983E-20	2.443E-20	23	133
12	GO:0031589	cell-substrate adhesion	1.494E-23	5.258E-21	4.693E-20	6.310E-20	33	397
13	GO:0072359	circulatory system development	3.063E-23	9.950E-21	8.881E-20	1.293E-19	54	1340
14	GO:0001503	ossification	2.021E-22	6.097E-20	5.442E-19	8.535E-19	34	466
15	GO:0043687	post-translational protein modification	2.174E-22	6.121E-20	5.463E-19	9.181E-19	31	366
16	GO:0035295	tube development	4.998E-22	1.319E-19	1.177E-18	2.111E-18	52	1310
17	GO:0009887	animal organ morphogenesis	6.577E-22	1.623E-19	1.448E-18	2.778E-18	51	1263
18	GO:0048514	blood vessel morphogenesis	6.917E-22	1.623E-19	1.448E-18	2.921E-18	41	768
19	GO:2000145	regulation of cell motility	7.396E-22	1.644E-19	1.467E-18	3.124E-18	49	1159
20	GO:0035239	tube morphogenesis	1.204E-21	2.541E-19	2.268E-18	5.083E-18	47	1068
21	GO:0030155	regulation of cell adhesion	1.319E-21	2.652E-19	2.367E-18	5.568E-18	42	827
22	GO:0030334	regulation of cell migration	2.690E-21	5.164E-19	4.609E-18	1.136E-17	47	1089
23	GO:0070848	response to growth factor	3.949E-21	7.251E-19	6.472E-18	1.668E-17	41	805
24	GO:0040012	regulation of locomotion	4.654E-21	8.189E-19	7.310E-18	1.965E-17	49	1210
25	GO:0051270	regulation of cellular component movement	1.847E-20	3.119E-18	2.784E-17	7.799E-17	49	1250
26	GO:0002576	platelet degranulation	5.724E-20	9.297E-18	8.298E-17	2.417E-16	20	129
27	GO:0051241	negative regulation of multicellular organismal process	5.018E-19	7.790E-17	6.953E-16	2.119E-15	48	1295
28	GO:0071363	cellular response to growth factor stimulus	5.165E-19	7.790E-17	6.953E-16	2.181E-15	38	775
29	GO:0061448	connective tissue development	6.557E-19	9.548E-17	8.522E-16	2.769E-15	26	306
30	GO:0085029	extracellular matrix assembly	8.980E-19	1.264E-16	1.128E-15	3.792E-15	14	46
31	GO:0001525	angiogenesis	1.242E-18	1.692E-16	1.510E-15	5.245E-15	35	658
32	GO:0042127	regulation of cell population proliferation	1.081E-17	1.427E-15	1.273E-14	4.565E-14	57	1973
33	GO:0007167	enzyme linked receptor protein signaling pathway	1.174E-17	1.503E-15	1.341E-14	4.960E-14	44	1168
34	GO:0010466	negative regulation of peptidase activity	1.217E-17	1.512E-15	1.349E-14	5.139E-14	24	279
35	GO:0009719	response to endogenous stimulus	1.284E-17	1.549E-15	1.383E-14	5.422E-14	54	1780
36	GO:0051216	cartilage development	1.781E-17	2.089E-15	1.865E-14	7.521E-14	22	224
37	GO:0010951	negative regulation of endopeptidase activity	5.417E-17	6.183E-15	5.519E-14	2.288E-13	23	266
38	GO:0048646	anatomical structure formation involved in morphogenesis	5.579E-17	6.200E-15	5.534E-14	2.356E-13	47	1395
39	GO:0009611	response to wounding	6.241E-17	6.758E-15	6.032E-14	2.635E-13	35	746
40	GO:0051346	negative regulation of hydrolase activity	1.210E-16	1.278E-14	1.140E-13	5.111E-13	29	494
41	GO:2000026	regulation of multicellular organismal development	2.055E-16	2.117E-14	1.890E-13	8.680E-13	50	1632
42	GO:0071495	cellular response to endogenous stimulus	2.349E-16	2.362E-14	2.108E-13	9.921E-13	48	1510
43	GO:0071559	response to transforming growth factor beta	3.364E-16	3.304E-14	2.949E-13	1.421E-12	23	289
44	GO:0097435	supramolecular fiber organization	4.061E-16	3.898E-14	3.479E-13	1.715E-12	35	793
45	GO:0022617	extracellular matrix disassembly	5.676E-16	5.327E-14	4.755E-13	2.397E-12	15	87
46	GO:0045861	negative regulation of proteolysis	1.290E-15	1.184E-13	1.057E-12	5.448E-12	25	379
47	GO:0010810	regulation of cell-substrate adhesion	1.739E-15	1.562E-13	1.394E-12	7.343E-12	21	246
48	GO:0042060	wound healing	1.983E-15	1.745E-13	1.557E-12	8.375E-12	30	594
49	GO:0071560	cellular response to transforming growth factor beta stimulus	2.350E-15	2.025E-13	1.808E-12	9.925E-12	22	282
50	GO:0046903	secretion	2.606E-15	2.201E-13	1.964E-12	1.100E-11	49	1672

## Sheet: GO Cellular Component
GO terms: Cellular Component
Applied Cut off pValue<0.001
	ID	Name	pValue	FDR B&H	FDR B&Y	Bonferroni	Genes from Input	Genes in Annotation
1	GO:0031012	extracellular matrix	5.962E-148	1.637E-145	1.058E-144	2.146E-145	122	633
2	GO:0030312	external encapsulating structure	9.095E-148	1.637E-145	1.058E-144	3.274E-145	122	635
3	GO:0062023	collagen-containing extracellular matrix	1.505E-147	1.806E-145	1.167E-144	5.417E-145	115	498
4	GO:0005788	endoplasmic reticulum lumen	3.938E-54	3.544E-52	2.291E-51	1.418E-51	53	323
5	GO:0005604	basement membrane	9.433E-38	6.792E-36	4.391E-35	3.396E-35	31	122
6	GO:0005581	collagen trimer	2.900E-25	1.740E-23	1.125E-22	1.044E-22	21	87
7	GO:0034774	secretory granule lumen	7.695E-23	3.957E-21	2.558E-20	2.770E-20	30	324
8	GO:0060205	cytoplasmic vesicle lumen	1.101E-22	4.956E-21	3.204E-20	3.965E-20	30	328
9	GO:0031983	vesicle lumen	1.315E-22	5.260E-21	3.401E-20	4.734E-20	30	330
10	GO:0031091	platelet alpha granule	1.522E-21	5.481E-20	3.543E-19	5.481E-19	19	92
11	GO:0030141	secretory granule	4.610E-21	1.509E-19	9.754E-19	1.660E-18	43	905
12	GO:0031093	platelet alpha granule lumen	2.059E-19	6.178E-18	3.994E-17	7.414E-17	16	67
13	GO:0099503	secretory vesicle	1.731E-18	4.794E-17	3.099E-16	6.232E-16	44	1113
14	GO:0043202	lysosomal lumen	9.865E-17	2.537E-15	1.640E-14	3.551E-14	16	96
15	GO:0005775	vacuolar lumen	6.632E-15	1.592E-13	1.029E-12	2.388E-12	18	174
16	GO:0005796	Golgi lumen	1.172E-14	2.638E-13	1.705E-12	4.220E-12	15	106
17	GO:0009986	cell surface	6.041E-14	1.279E-12	8.269E-12	2.175E-11	37	1053
18	GO:0005583	fibrillar collagen trimer	1.891E-12	3.583E-11	2.316E-10	6.807E-10	7	12
19	GO:0098643	banded collagen fibril	1.891E-12	3.583E-11	2.316E-10	6.807E-10	7	12
20	GO:0098644	complex of collagen trimers	3.669E-12	6.604E-11	4.269E-10	1.321E-9	8	21
21	GO:0043256	laminin complex	5.025E-10	8.615E-9	5.569E-8	1.809E-7	6	13
22	GO:0005764	lysosome	1.806E-9	2.827E-8	1.828E-7	6.503E-7	25	726
23	GO:0000323	lytic vacuole	1.806E-9	2.827E-8	1.828E-7	6.503E-7	25	726
24	GO:0072562	blood microparticle	4.171E-9	6.257E-8	4.045E-7	1.502E-6	12	148
25	GO:0070820	tertiary granule	1.334E-7	1.921E-6	1.242E-5	4.803E-5	11	164
26	GO:0005794	Golgi apparatus	1.757E-7	2.433E-6	1.573E-5	6.325E-5	36	1710
27	GO:1904724	tertiary granule lumen	3.584E-7	4.779E-6	3.089E-5	1.290E-4	7	55
28	GO:0043259	laminin-10 complex	5.742E-7	6.460E-6	4.176E-5	2.067E-4	3	3
29	GO:0043260	laminin-11 complex	5.742E-7	6.460E-6	4.176E-5	2.067E-4	3	3
30	GO:0005606	laminin-1 complex	5.742E-7	6.460E-6	4.176E-5	2.067E-4	3	3
31	GO:0005589	collagen type VI trimer	5.742E-7	6.460E-6	4.176E-5	2.067E-4	3	3
32	GO:0098647	collagen beaded filament	5.742E-7	6.460E-6	4.176E-5	2.067E-4	3	3
33	GO:0035580	specific granule lumen	8.271E-7	9.023E-6	5.833E-5	2.978E-4	7	62
34	GO:0031594	neuromuscular junction	1.646E-6	1.743E-5	1.127E-4	5.926E-4	8	98
35	GO:0001527	microfibril	2.191E-6	2.254E-5	1.457E-4	7.889E-4	4	12
36	GO:0005588	collagen type V trimer	2.264E-6	2.264E-5	1.464E-4	8.150E-4	3	4

## Sheet: PATHWAY
PATHWAY
	ID	Name	Source	pValue	FDR B&H	FDR B&Y	Bonferroni	Genes from Input	Genes in Annotation
1	M5889	Ensemble of genes encoding extracellular matrix and extracellular matrix-associated proteins	MSigDB C2 BIOCARTA (v7.3)	6.717E-135	6.153E-132	4.552E-131	6.153E-132	140	1026
2	M5884	Ensemble of genes encoding core extracellular matrix including ECM glycoproteins, collagens and proteoglycans	MSigDB C2 BIOCARTA (v7.3)	1.567E-85	7.177E-83	5.310E-82	1.435E-82	75	275
3	1270244	Extracellular matrix organization	BioSystems: REACTOME	2.416E-69	7.376E-67	5.457E-66	2.213E-66	67	298
4	M3008	Genes encoding structural ECM glycoproteins	MSigDB C2 BIOCARTA (v7.3)	1.949E-55	4.463E-53	3.301E-52	1.785E-52	51	196
5	M5885	Ensemble of genes encoding ECM-associated proteins including ECM-affilaited proteins, ECM regulators and secreted factors	MSigDB C2 BIOCARTA (v7.3)	1.738E-39	3.184E-37	2.355E-36	1.592E-36	65	751
6	M3468	Genes encoding enzymes and their regulators involved in the remodeling of the extracellular matrix	MSigDB C2 BIOCARTA (v7.3)	9.420E-30	1.438E-27	1.064E-26	8.629E-27	36	238
7	1270245	Collagen formation	BioSystems: REACTOME	5.373E-29	7.030E-27	5.201E-26	4.921E-26	26	93
8	M18	Beta1 integrin cell surface interactions	MSigDB C2 BIOCARTA (v7.3)	2.802E-28	3.208E-26	2.373E-25	2.566E-25	23	66
9	M7098	ECM-receptor interaction	MSigDB C2 BIOCARTA (v7.3)	5.997E-24	6.104E-22	4.515E-21	5.493E-21	22	84
10	1270256	ECM proteoglycans	BioSystems: REACTOME	4.440E-23	4.067E-21	3.009E-20	4.067E-20	19	57
11	1270246	Collagen biosynthesis and modifying enzymes	BioSystems: REACTOME	3.879E-21	3.230E-19	2.390E-18	3.553E-18	19	70
12	1270257	Degradation of the extracellular matrix	BioSystems: REACTOME	5.719E-21	4.087E-19	3.024E-18	5.239E-18	22	112
13	1270247	Assembly of collagen fibrils and other multimeric structures	BioSystems: REACTOME	5.801E-21	4.087E-19	3.024E-18	5.313E-18	18	60
14	M198	Syndecan-1-mediated signaling events	MSigDB C2 BIOCARTA (v7.3)	6.049E-20	3.958E-18	2.928E-17	5.541E-17	16	46
15	83068	ECM-receptor interaction	BioSystems: KEGG	1.067E-19	6.513E-18	4.818E-17	9.769E-17	19	82
16	1269367	Platelet degranulation	BioSystems: REACTOME	4.638E-18	2.655E-16	1.964E-15	4.248E-15	21	132
17	1269365	Response to elevated platelet cytosolic Ca2+	BioSystems: REACTOME	1.027E-17	5.534E-16	4.094E-15	9.408E-15	21	137
18	M160	Integrins in angiogenesis	MSigDB C2 BIOCARTA (v7.3)	1.149E-17	5.848E-16	4.326E-15	1.053E-14	17	74
19	M5887	Genes encoding structural components of basement membranes	MSigDB C2 BIOCARTA (v7.3)	1.238E-17	5.966E-16	4.414E-15	1.134E-14	14	40
20	1270251	Elastic fibre formation	BioSystems: REACTOME	2.761E-17	1.265E-15	9.356E-15	2.530E-14	14	42
21	M39565	miRNA targets in ECM and membrane receptors	MSigDB C2 BIOCARTA (v7.3)	4.053E-17	1.768E-15	1.308E-14	3.712E-14	14	43
22	M7253	Focal adhesion	MSigDB C2 BIOCARTA (v7.3)	2.024E-15	8.428E-14	6.235E-13	1.854E-12	22	199
23	M3005	Genes encoding collagen proteins	MSigDB C2 BIOCARTA (v7.3)	2.386E-15	9.501E-14	7.029E-13	2.185E-12	13	44
24	1470926	Collagen chain trimerization	BioSystems: REACTOME	6.268E-15	2.392E-13	1.770E-12	5.741E-12	13	47
25	P00034	Integrin signalling pathway	PantherDB	8.789E-15	3.220E-13	2.382E-12	8.051E-12	20	167
26	1270259	Collagen degradation	BioSystems: REACTOME	3.340E-14	1.177E-12	8.705E-12	3.059E-11	12	41
27	M53	Beta3 integrin cell surface interactions	MSigDB C2 BIOCARTA (v7.3)	6.354E-14	2.156E-12	1.595E-11	5.820E-11	12	43
28	M5882	Genes encoding proteoglycans	MSigDB C2 BIOCARTA (v7.3)	1.664E-13	5.443E-12	4.027E-11	1.524E-10	11	35
29	1269011	Diseases associated with glycosaminoglycan metabolism	BioSystems: REACTOME	2.048E-13	6.467E-12	4.784E-11	1.876E-10	10	26
30	1269010	Diseases of glycosylation	BioSystems: REACTOME	1.508E-12	4.605E-11	3.407E-10	1.382E-9	14	86
31	83067	Focal adhesion	BioSystems: KEGG	2.660E-12	7.861E-11	5.816E-10	2.437E-9	19	199
32	M39641	Inflammatory Response Pathway	MSigDB C2 BIOCARTA (v7.3)	3.321E-12	9.505E-11	7.032E-10	3.042E-9	10	33
33	1270253	Laminin interactions	BioSystems: REACTOME	6.968E-12	1.933E-10	1.430E-9	6.382E-9	9	25
34	167324	Amoebiasis	BioSystems: KEGG	7.175E-12	1.933E-10	1.430E-9	6.573E-9	14	96
35	M39719	Focal Adhesion-PI3K-Akt-mTOR-signaling pathway	MSigDB C2 BIOCARTA (v7.3)	1.659E-11	4.343E-10	3.213E-9	1.520E-8	22	309
36	1269340	Hemostasis	BioSystems: REACTOME	2.050E-11	5.217E-10	3.860E-9	1.878E-8	31	640
37	1269350	Platelet activation, signaling and aggregation	BioSystems: REACTOME	2.136E-11	5.288E-10	3.912E-9	1.957E-8	21	282
38	M39402	Focal Adhesion	MSigDB C2 BIOCARTA (v7.3)	3.311E-11	7.981E-10	5.904E-9	3.033E-8	18	202
39	692234	PI3K-Akt signaling pathway	BioSystems: KEGG	1.195E-10	2.806E-9	2.076E-8	1.094E-7	22	342
40	1270254	Non-integrin membrane-ECM interactions	BioSystems: REACTOME	1.280E-10	2.931E-9	2.168E-8	1.172E-7	10	46
41	M39736	PI3K-Akt Signaling Pathway	MSigDB C2 BIOCARTA (v7.3)	1.413E-10	3.157E-9	2.336E-8	1.295E-7	22	345
42	M39619	Senescence and Autophagy in Cancer	MSigDB C2 BIOCARTA (v7.3)	4.897E-10	1.068E-8	7.901E-8	4.486E-7	13	108
43	M39421	miR-509-3p alteration of YAP1/ECM axis	MSigDB C2 BIOCARTA (v7.3)	1.376E-9	2.931E-8	2.168E-7	1.260E-6	7	19
44	1270252	Molecules associated with elastic fibres	BioSystems: REACTOME	2.204E-9	4.588E-8	3.394E-7	2.019E-6	8	31
45	1268755	Regulation of Insulin-like Growth Factor (IGF) transport and uptake by Insulin-like Growth Factor Binding Proteins (IGFBPs)	BioSystems: REACTOME	3.112E-9	6.334E-8	4.686E-7	2.850E-6	7	21
46	M39870	Type I collagen synthesis in the context of Osteogenesis imperfecta	MSigDB C2 BIOCARTA (v7.3)	3.801E-9	7.568E-8	5.599E-7	3.481E-6	8	33
47	1269372	Dissolution of Fibrin Clot	BioSystems: REACTOME	4.279E-9	8.339E-8	6.169E-7	3.919E-6	6	13
48	172847	Protein digestion and absorption	BioSystems: KEGG	9.425E-9	1.799E-7	1.331E-6	8.634E-6	11	90
49	1270249	Crosslinking of collagen fibrils	BioSystems: REACTOME	2.793E-8	5.221E-7	3.862E-6	2.558E-5	5	9
50	1309217	Defective B3GALT6 causes EDSP2 and SEMDJL1	BioSystems: REACTOME	6.374E-8	1.123E-6	8.307E-6	5.839E-5	6	19
