# Supplementary material for: Pathogenesis of Enamel-Renal Syndrome Associated Gingival Fibromatosis: A Proteomic Approach
Source: Front Endocrinol (Lausanne). 2021 Oct 29;12:752568. doi: 10.3389/fendo.2021.752568 (PMC8586505; doi:10.3389/fendo.2021.752568)
Supplement: Supplementary file 8 [file Table_7.xlsx]

## Sheet: GO Molecular Function
GO terms Molecular Function
Apllied Cut Off pValue <0.01
	ID	Name	Source	pValue	FDR B&H	FDR B&Y	Bonferroni	Genes from Input	Genes in Annotation
1	GO:0005201	extracellular matrix structural constituent		1.034E-18	1.664E-16	9.423E-16	1.664E-16	13	185
2	GO:0005198	structural molecule activity		6.035E-11	4.858E-9	2.751E-8	9.717E-9	13	743
3	GO:0005518	collagen binding		3.912E-9	2.099E-7	1.189E-6	6.298E-7	6	82
4	GO:0030021	extracellular matrix structural constituent conferring compression resistance		5.264E-8	2.119E-6	1.199E-5	8.474E-6	4	23
5	GO:0030020	extracellular matrix structural constituent conferring tensile strength		6.509E-7	2.096E-5	1.187E-4	1.048E-4	4	42
6	GO:0005539	glycosaminoglycan binding		3.076E-6	8.255E-5	4.674E-4	4.953E-4	6	252
7	GO:0005178	integrin binding		5.476E-6	1.154E-4	6.536E-4	8.817E-4	5	157
8	GO:0004175	endopeptidase activity		6.964E-6	1.154E-4	6.536E-4	1.121E-3	8	640
9	GO:0008233	peptidase activity		7.582E-6	1.154E-4	6.536E-4	1.221E-3	9	868
10	GO:0008475	procollagen-lysine 5-dioxygenase activity		7.887E-6	1.154E-4	6.536E-4	1.270E-3	2	3
11	GO:0033823	procollagen glucosyltransferase activity		7.887E-6	1.154E-4	6.536E-4	1.270E-3	2	3
12	GO:0070815	peptidyl-lysine 5-dioxygenase activity		1.576E-5	2.114E-4	1.197E-3	2.537E-3	2	4
13	GO:0005102	signaling receptor binding		1.900E-5	2.306E-4	1.306E-3	3.059E-3	12	1842
14	GO:0002020	protease binding		2.005E-5	2.306E-4	1.306E-3	3.229E-3	6	350
15	GO:0044877	protein-containing complex binding		2.373E-5	2.547E-4	1.442E-3	3.821E-3	11	1565
16	GO:0043394	proteoglycan binding		5.884E-5	5.920E-4	3.352E-3	9.473E-3	3	4

## Sheet: GO Biological Process
GO terms Biological Process
Apllied Cut Off pValue <0.01
	ID	Name	Source	pValue	FDR B&H	FDR B&Y	Bonferroni	Genes from Input	Genes in Annotation
1	GO:0030198	extracellular matrix organization		2.093E-22	1.347E-19	1.080E-18	3.566E-19	18	431
2	GO:0043062	extracellular structure organization		2.182E-22	1.347E-19	1.080E-18	3.718E-19	18	432
3	GO:0045229	external encapsulating structure organization		2.372E-22	1.347E-19	1.080E-18	4.042E-19	18	434
4	GO:0007155	cell adhesion		2.324E-11	7.212E-9	5.782E-8	3.961E-8	17	1571
5	GO:0022610	biological adhesion		2.495E-11	7.212E-9	5.782E-8	4.251E-8	17	1578
6	GO:0001944	vasculature development		2.539E-11	7.212E-9	5.782E-8	4.327E-8	14	903
7	GO:0001525	angiogenesis		1.594E-10	3.881E-8	3.112E-7	2.717E-7	12	658
8	GO:0001568	blood vessel development		2.444E-10	5.206E-8	4.174E-7	4.165E-7	13	866
9	GO:0072359	circulatory system development		3.759E-10	7.117E-8	5.706E-7	6.405E-7	15	1340
10	GO:0048514	blood vessel morphogenesis		9.323E-10	1.589E-7	1.274E-6	1.589E-6	12	768
11	GO:0035239	tube morphogenesis		3.159E-9	4.772E-7	3.826E-6	5.382E-6	13	1068
12	GO:0035295	tube development		3.360E-9	4.772E-7	3.826E-6	5.726E-6	14	1310
13	GO:0030199	collagen fibril organization		4.721E-8	6.189E-6	4.962E-5	8.045E-5	5	63
14	GO:0016525	negative regulation of angiogenesis		2.128E-7	2.455E-5	1.968E-4	3.626E-4	6	166
15	GO:2000181	negative regulation of blood vessel morphogenesis		2.365E-7	2.455E-5	1.968E-4	4.030E-4	6	169
16	GO:0022617	extracellular matrix disassembly		2.416E-7	2.455E-5	1.968E-4	4.118E-4	5	87
17	GO:1901343	negative regulation of vasculature development		2.449E-7	2.455E-5	1.968E-4	4.173E-4	6	170
18	GO:0048646	anatomical structure formation involved in morphogenesis		6.869E-7	6.503E-5	5.214E-4	1.171E-3	12	1395
19	GO:0045765	regulation of angiogenesis		1.825E-6	1.637E-4	1.312E-3	3.110E-3	7	382
20	GO:1901342	regulation of vasculature development		2.024E-6	1.724E-4	1.383E-3	3.449E-3	7	388
21	GO:0010810	regulation of cell-substrate adhesion		2.125E-6	1.724E-4	1.383E-3	3.621E-3	6	246
22	GO:0031589	cell-substrate adhesion		2.356E-6	1.825E-4	1.463E-3	4.014E-3	7	397
23	GO:0006027	glycosaminoglycan catabolic process		2.705E-6	2.004E-4	1.607E-3	4.610E-3	4	62
24	GO:0010811	positive regulation of cell-substrate adhesion		3.054E-6	2.168E-4	1.739E-3	5.204E-3	5	145
25	GO:0006026	aminoglycan catabolic process		3.923E-6	2.674E-4	2.144E-3	6.685E-3	4	68

## Sheet: GO Cellular Component
GO terms Cellular Component
Apllied Cut Off pValue <0.01
	ID	Name	pValue	FDR B&H	FDR B&Y	Bonferroni	Genes from Input	Genes in Annotation
1	GO:0062023	collagen-containing extracellular matrix	1.185E-32	1.363E-30	7.261E-30	1.363E-30	24	498
2	GO:0031012	extracellular matrix	3.983E-32	1.653E-30	8.807E-30	4.580E-30	25	633
3	GO:0030312	external encapsulating structure	4.313E-32	1.653E-30	8.807E-30	4.960E-30	25	635
4	GO:0005604	basement membrane	1.918E-13	5.515E-12	2.938E-11	2.206E-11	9	122
5	GO:0005788	endoplasmic reticulum lumen	4.347E-11	9.997E-10	5.325E-9	4.999E-9	10	323
6	GO:0005581	collagen trimer	4.349E-9	8.336E-8	4.440E-7	5.002E-7	6	87
7	GO:0005589	collagen type VI trimer	7.237E-6	1.040E-4	5.541E-4	8.323E-4	2	3
8	GO:0098647	collagen beaded filament	7.237E-6	1.040E-4	5.541E-4	8.323E-4	2	3
9	GO:0031091	platelet alpha granule	1.297E-5	1.657E-4	8.825E-4	1.491E-3	4	92

## Sheet: Pathway
Pathway
Apllied Cut Off pValue <0.01
	ID	Name	Source	pValue	FDR B&H	FDR B&Y	Bonferroni	Genes from Input	Genes in Annotation
1	M5889	Ensemble of genes encoding extracellular matrix and extracellular matrix-associated proteins	MSigDB C2 BIOCARTA (v7.3)	8.027E-27	3.163E-24	2.073E-23	3.163E-24	27	1026
2	1270244	Extracellular matrix organization	BioSystems: REACTOME	4.102E-19	8.081E-17	5.297E-16	1.616E-16	16	298
3	M5884	Ensemble of genes encoding core extracellular matrix including ECM glycoproteins, collagens and proteoglycans	MSigDB C2 BIOCARTA (v7.3)	2.609E-16	3.427E-14	2.246E-13	1.028E-13	14	275
4	1270246	Collagen biosynthesis and modifying enzymes	BioSystems: REACTOME	1.655E-10	1.630E-8	1.069E-7	6.522E-8	7	70
5	1270245	Collagen formation	BioSystems: REACTOME	1.262E-9	9.948E-8	6.520E-7	4.974E-7	7	93
6	M5885	Ensemble of genes encoding ECM-associated proteins including ECM-affilaited proteins, ECM regulators and secreted factors	MSigDB C2 BIOCARTA (v7.3)	3.199E-9	2.101E-7	1.377E-6	1.260E-6	13	751
7	M160	Integrins in angiogenesis	MSigDB C2 BIOCARTA (v7.3)	1.380E-8	7.767E-7	5.091E-6	5.437E-6	6	74
8	M3468	Genes encoding enzymes and their regulators involved in the remodeling of the extracellular matrix	MSigDB C2 BIOCARTA (v7.3)	4.296E-8	2.116E-6	1.387E-5	1.693E-5	8	238
9	1270257	Degradation of the extracellular matrix	BioSystems: REACTOME	1.678E-7	7.347E-6	4.816E-5	6.613E-5	6	112
10	83068	ECM-receptor interaction	BioSystems: KEGG	1.048E-6	3.882E-5	2.545E-4	4.131E-4	5	82
11	M5882	Genes encoding proteoglycans	MSigDB C2 BIOCARTA (v7.3)	1.092E-6	3.882E-5	2.545E-4	4.304E-4	4	35
12	M7098	ECM-receptor interaction	MSigDB C2 BIOCARTA (v7.3)	1.182E-6	3.882E-5	2.545E-4	4.659E-4	5	84
13	M5887	Genes encoding structural components of basement membranes	MSigDB C2 BIOCARTA (v7.3)	1.892E-6	5.733E-5	3.758E-4	7.453E-4	4	40
14	M39565	miRNA targets in ECM and membrane receptors	MSigDB C2 BIOCARTA (v7.3)	2.542E-6	7.155E-5	4.690E-4	1.002E-3	4	43
15	M3005	Genes encoding collagen proteins	MSigDB C2 BIOCARTA (v7.3)	2.792E-6	7.334E-5	4.807E-4	1.100E-3	4	44
16	M198	Syndecan-1-mediated signaling events	MSigDB C2 BIOCARTA (v7.3)	3.346E-6	8.239E-5	5.400E-4	1.318E-3	4	46
17	1470926	Collagen chain trimerization	BioSystems: REACTOME	3.651E-6	8.462E-5	5.547E-4	1.439E-3	4	47
18	M3008	Genes encoding structural ECM glycoproteins	MSigDB C2 BIOCARTA (v7.3)	4.477E-6	9.800E-5	6.424E-4	1.764E-3	6	196
19	782000	Proteoglycans in cancer	BioSystems: KEGG	5.480E-6	1.136E-4	7.449E-4	2.159E-3	6	203
20	1270256	ECM proteoglycans	BioSystems: REACTOME	7.959E-6	1.568E-4	1.028E-3	3.136E-3	4	57
21	1270247	Assembly of collagen fibrils and other multimeric structures	BioSystems: REACTOME	9.778E-6	1.835E-4	1.203E-3	3.853E-3	4	60

## Sheet: Disease
Disease
Five most
	ID	Name	Source	pValue	FDR B&H	FDR B&Y	Bonferroni	Genes from Input	Genes in Annotation
1	C1519670	Tumor Angiogenesis	DisGeNET BeFree	1.276E-11	2.747E-8	2.267E-7	2.747E-8	14	822
2	C0271183	Severe myopia	DisGeNET BeFree	6.205E-11	6.679E-8	5.512E-7	1.336E-7	8	142
3	C0029408	Degenerative polyarthritis	DisGeNET BeFree	1.501E-10	1.077E-7	8.891E-7	3.232E-7	17	1694
4	C1511789	Desmoplastic	DisGeNET BeFree	7.274E-10	3.915E-7	3.231E-6	1.566E-6	7	117
5	C0239946	Fibrosis, Liver	DisGeNET BeFree	5.709E-9	2.458E-6	2.029E-5	1.229E-5	13	1075
