# Supplementary material for: Pathogenesis of Enamel-Renal Syndrome Associated Gingival Fibromatosis: A Proteomic Approach
Source: Front Endocrinol (Lausanne). 2021 Oct 29;12:752568. doi: 10.3389/fendo.2021.752568 (PMC8586505; doi:10.3389/fendo.2021.752568)
Supplement: Supplementary file 9 [file Table_8.xlsx]

## Sheet: GO Molecular Function
GO terms Molecular Function
Apllied Cut Off pValue <0.01
	ID	Name	Source	pValue	FDR B&H	FDR B&Y	Bonferroni	Genes from Input	Genes in Annotation
1	GO:0061135	endopeptidase regulator activity		3.019E-6	2.831E-4	1.549E-3	4.016E-4	4	194
2	GO:0005544	calcium-dependent phospholipid binding		4.549E-6	2.831E-4	1.549E-3	6.050E-4	3	60
3	GO:0061134	peptidase regulator activity		6.792E-6	2.831E-4	1.549E-3	9.033E-4	4	238
4	GO:0005539	glycosaminoglycan binding		8.514E-6	2.831E-4	1.549E-3	1.132E-3	4	252
5	GO:0004867	serine-type endopeptidase inhibitor activity		1.998E-5	5.027E-4	2.751E-3	2.658E-3	3	98
6	GO:0046790	virion binding		2.269E-5	5.027E-4	2.751E-3	3.017E-3	2	13
7	GO:0004859	phospholipase inhibitor activity		2.646E-5	5.027E-4	2.751E-3	3.519E-3	2	14
8	GO:0002020	protease binding		3.100E-5	5.153E-4	2.819E-3	4.123E-3	4	350
9	GO:0055102	lipase inhibitor activity		4.964E-5	6.946E-4	3.800E-3	6.602E-3	2	19
10	GO:0004857	enzyme inhibitor activity		5.223E-5	6.946E-4	3.800E-3	6.946E-3	4	400
11	GO:0015085	calcium ion transmembrane transporter activity		7.269E-5	8.789E-4	4.809E-3	9.668E-3	3	151
12	GO:0004866	endopeptidase inhibitor activity		1.265E-4	1.402E-3	7.671E-3	1.682E-2	3	182
10	GO:0010757	negative regulation of plasminogen activation		4.034E-6	4.900E-4	3.771E-3	4.978E-3	2	6
11	GO:0043086	negative regulation of catalytic activity		4.487E-6	4.900E-4	3.771E-3	5.537E-3	6	969
12	GO:0048608	reproductive structure development		4.931E-6	4.900E-4	3.771E-3	6.085E-3	5	530
13	GO:0061458	reproductive system development		5.162E-6	4.900E-4	3.771E-3	6.370E-3	5	535
14	GO:0030193	regulation of blood coagulation		7.304E-6	5.869E-4	4.517E-3	9.013E-3	3	73
15	GO:0070459	prolactin secretion		7.526E-6	5.869E-4	4.517E-3	9.287E-3	2	8
16	GO:1900046	regulation of hemostasis		7.610E-6	5.869E-4	4.517E-3	9.391E-3	3	74

## Sheet: GO Biological Process
GO terms Biological Process
Apllied Cut Off pValue <0.01
	ID	Name	pValue	FDR B&H	FDR B&Y	Bonferroni	Genes from Input	Genes in Annotation
1	GO:0030195	negative regulation of blood coagulation	1.480E-8	7.008E-6	5.336E-5	1.685E-5	4	54
2	GO:1900047	negative regulation of hemostasis	1.596E-8	7.008E-6	5.336E-5	1.816E-5	4	55
3	GO:0050819	negative regulation of coagulation	1.847E-8	7.008E-6	5.336E-5	2.102E-5	4	57
4	GO:0030198	extracellular matrix organization	3.832E-8	7.573E-6	5.767E-5	4.360E-5	6	431
5	GO:0043062	extracellular structure organization	3.885E-8	7.573E-6	5.767E-5	4.421E-5	6	432
6	GO:0045229	external encapsulating structure organization	3.993E-8	7.573E-6	5.767E-5	4.544E-5	6	434
7	GO:0030193	regulation of blood coagulation	5.068E-8	7.619E-6	5.801E-5	5.767E-5	4	73
8	GO:1900046	regulation of hemostasis	5.356E-8	7.619E-6	5.801E-5	6.095E-5	4	74
9	GO:0050818	regulation of coagulation	6.632E-8	8.386E-6	6.386E-5	7.548E-5	4	78
10	GO:0061045	negative regulation of wound healing	8.956E-8	1.019E-5	7.761E-5	1.019E-4	4	84
11	GO:1903035	negative regulation of response to wounding	2.123E-7	2.196E-5	1.672E-4	2.415E-4	4	104
12	GO:0061041	regulation of wound healing	8.287E-7	7.859E-5	5.984E-4	9.431E-4	4	146
13	GO:1903034	regulation of response to wounding	2.421E-6	2.119E-4	1.614E-3	2.755E-3	4	191
14	GO:0052405	negative regulation by host of symbiont molecular function	2.690E-6	2.187E-4	1.665E-3	3.061E-3	2	5
15	GO:0051346	negative regulation of hydrolase activity	3.496E-6	2.652E-4	2.019E-3	3.978E-3	5	494
16	GO:0010757	negative regulation of plasminogen activation	4.034E-6	2.869E-4	2.185E-3	4.591E-3	2	6
17	GO:0043086	negative regulation of catalytic activity	4.487E-6	2.957E-4	2.252E-3	5.106E-3	6	969
18	GO:0030199	collagen fibril organization	4.677E-6	2.957E-4	2.252E-3	5.323E-3	3	63
19	GO:0052428	modulation by host of symbiont molecular function	5.646E-6	3.059E-4	2.330E-3	6.425E-3	2	7
20	GO:0052204	negative regulation of molecular function in other organism involved in symbiotic interaction	5.646E-6	3.059E-4	2.330E-3	6.425E-3	2	7
21	GO:0044362	negative regulation of molecular function in other organism	5.646E-6	3.059E-4	2.330E-3	6.425E-3	2	7
22	GO:0060348	bone development	6.091E-6	3.151E-4	2.399E-3	6.932E-3	4	241
23	GO:0042060	wound healing	8.597E-6	4.234E-4	3.224E-3	9.783E-3	5	594

## Sheet: GO Cellular Component
GO terms Cellular Component
Apllied Cut Off pValue <0.01
	ID	Name	Source	pValue	FDR B&H	FDR B&Y	Bonferroni	Genes from Input	Genes in Annotation
1	GO:0031012	extracellular matrix		1.390E-12	7.580E-11	3.976E-10	1.474E-10	9	633
2	GO:0030312	external encapsulating structure		1.430E-12	7.580E-11	3.976E-10	1.516E-10	9	635
3	GO:0062023	collagen-containing extracellular matrix		1.943E-11	6.864E-10	3.601E-9	2.059E-9	8	498
4	GO:0042383	sarcolemma		1.849E-6	4.901E-5	2.571E-4	1.960E-4	4	179

## Sheet: Pathway
Pathway
Apllied Cut Off pValue <0.01
	ID	Name	Source	pValue	FDR B&H	FDR B&Y	Bonferroni	Genes from Input	Genes in Annotation
1	M5889	Ensemble of genes encoding extracellular matrix and extracellular matrix-associated proteins	MSigDB C2 BIOCARTA (v7.3)	5.768E-11	6.691E-9	3.569E-8	6.691E-9	10	1026
2	1269372	Dissolution of Fibrin Clot	BioSystems: REACTOME	1.114E-7	6.464E-6	3.449E-5	1.293E-5	3	13
3	M5885	Ensemble of genes encoding ECM-associated proteins including ECM-affilaited proteins, ECM regulators and secreted factors	MSigDB C2 BIOCARTA (v7.3)	4.082E-7	1.579E-5	8.422E-5	4.736E-5	7	751
4	M39355	Prostaglandin Synthesis and Regulation	MSigDB C2 BIOCARTA (v7.3)	5.452E-6	1.581E-4	8.435E-4	6.324E-4	3	45
5	1270244	Extracellular matrix organization	BioSystems: REACTOME	6.554E-5	1.520E-3	8.112E-3	7.602E-3	4	298

## Sheet: Disease
Disease
	ID	Name	Source	pValue	FDR B&H	FDR B&Y	Bonferroni	Genes from Input	Genes in Annotation
1	C1519670	Tumor Angiogenesis	DisGeNET BeFree	6.874E-8	8.847E-5	6.846E-4	8.847E-5	7	822
2	C0162872	Aortic Aneurysm, Thoracic	DisGeNET BeFree	8.077E-7	5.198E-4	4.022E-3	1.040E-3	3	34
3	C1800706	Idiopathic Pulmonary Fibrosis	DisGeNET BeFree	1.700E-6	5.997E-4	4.641E-3	2.188E-3	6	786
4	C0162810	Cicatrix, Hypertrophic	DisGeNET BeFree	2.470E-6	5.997E-4	4.641E-3	3.179E-3	4	184
5	C0018801	Heart failure	DisGeNET BeFree	2.478E-6	5.997E-4	4.641E-3	3.189E-3	7	1391
6	C0034069	Pulmonary Fibrosis	DisGeNET BeFree	2.796E-6	5.997E-4	4.641E-3	3.598E-3	6	856
7	C1836653	Ascending aortic dissection	DisGeNET BeFree	4.393E-6	7.212E-4	5.580E-3	5.654E-3	2	6
8	C1168401	Squamous cell carcinoma of the head and neck	DisGeNET BeFree	4.483E-6	7.212E-4	5.580E-3	5.769E-3	7	1519
9	C0018802	Congestive heart failure	DisGeNET BeFree	5.716E-6	8.174E-4	6.325E-3	7.357E-3	7	1575
